# Supplementary material
Source: publisher figshare collection journal article supplement (https://acs.figshare.com/ndownloader/files/3809512)
Supplement: Supplementary file 1 [file 3809512]

 
data_vbchem009_0m_a
 
_audit_creation_method            SHELXL-2014/6
_chemical_name_systematic         ?
_chemical_name_common             ?
_chemical_melting_point           ?
_chemical_formula_moiety          ?
_chemical_formula_sum
 'C H N O S' 
_chemical_formula_weight          75.09

loop_
 _atom_type_symbol
 _atom_type_description
 _atom_type_scat_dispersion_real
 _atom_type_scat_dispersion_imag
 _atom_type_scat_source
 'C'  'C'   0.0033   0.0016
 'International Tables Vol C Tables 4.2.6.8 and 6.1.1.4'
 'H'  'H'   0.0000   0.0000
 'International Tables Vol C Tables 4.2.6.8 and 6.1.1.4'
 'N'  'N'   0.0061   0.0033
 'International Tables Vol C Tables 4.2.6.8 and 6.1.1.4'
 'O'  'O'   0.0106   0.0060
 'International Tables Vol C Tables 4.2.6.8 and 6.1.1.4'
 'S'  'S'   0.1246   0.1234
 'International Tables Vol C Tables 4.2.6.8 and 6.1.1.4'
 
_space_group_crystal_system       monoclinic
_space_group_IT_number            15
_space_group_name_H-M_alt         'C 2/c'
_space_group_name_Hall            '-C 2yc'
 
_shelx_space_group_comment
;
The symmetry employed for this shelxl refinement is uniquely defined
by the following loop, which should always be used as a source of
symmetry information in preference to the above space-group names.
They are only intended as comments.
;
 
loop_
 _space_group_symop_operation_xyz
 'x, y, z'
 '-x, y, -z+1/2'
 'x+1/2, y+1/2, z'
 '-x+1/2, y+1/2, -z+1/2'
 '-x, -y, -z'
 'x, -y, z-1/2'
 '-x+1/2, -y+1/2, -z'
 'x+1/2, -y+1/2, z-1/2'
 
_cell_length_a                    23.1139(9)
_cell_length_b                    10.9419(5)
_cell_length_c                    15.7400(6)
_cell_angle_alpha                 90
_cell_angle_beta                  93.904(2)
_cell_angle_gamma                 90
_cell_volume                      3971.6(3)
_cell_formula_units_Z             52
_cell_measurement_temperature     296(2)
_cell_measurement_reflns_used     ?
_cell_measurement_theta_min       ?
_cell_measurement_theta_max       ?
 
_exptl_crystal_description        ?
_exptl_crystal_colour             ?
_exptl_crystal_density_meas       ?
_exptl_crystal_density_method     ?
_exptl_crystal_density_diffrn     1.633          
_exptl_crystal_F_000              1976
_exptl_transmission_factor_min    ?
_exptl_transmission_factor_max    ?
_exptl_crystal_size_max           ?
_exptl_crystal_size_mid           ?
_exptl_crystal_size_min           ?
_exptl_absorpt_coefficient_mu     0.781
_shelx_estimated_absorpt_T_min    ?
_shelx_estimated_absorpt_T_max    ?
_exptl_absorpt_correction_type    ?
_exptl_absorpt_correction_T_min   ?
_exptl_absorpt_correction_T_max   ?
_exptl_absorpt_process_details    ?
_exptl_absorpt_special_details    ?
_diffrn_ambient_temperature       296(2)
_diffrn_radiation_wavelength      0.71073
_diffrn_radiation_type            MoK\a
_diffrn_source                    ?
_diffrn_measurement_device_type   ?
_diffrn_measurement_method        ?
_diffrn_detector_area_resol_mean  ?
_diffrn_reflns_number             48025
_diffrn_reflns_av_unetI/netI      0.0280
_diffrn_reflns_av_R_equivalents   0.0482
_diffrn_reflns_limit_h_min        -30
_diffrn_reflns_limit_h_max        30
_diffrn_reflns_limit_k_min        -14
_diffrn_reflns_limit_k_max        14
_diffrn_reflns_limit_l_min        -20
_diffrn_reflns_limit_l_max        20
_diffrn_reflns_theta_min          1.766
_diffrn_reflns_theta_max          28.229
_diffrn_reflns_theta_full         25.242
_diffrn_measured_fraction_theta_max   0.999
_diffrn_measured_fraction_theta_full  0.999
_diffrn_reflns_Laue_measured_fraction_max    0.999
_diffrn_reflns_Laue_measured_fraction_full   0.999
_diffrn_reflns_point_group_measured_fraction_max   0.999
_diffrn_reflns_point_group_measured_fraction_full  0.999
_reflns_number_total              4900
_reflns_number_gt                 3344
_reflns_threshold_expression      'I > 2\s(I)'
_reflns_Friedel_coverage          0.000
_reflns_Friedel_fraction_max      .
_reflns_Friedel_fraction_full     .
 
_reflns_special_details
;
 Reflections were merged by SHELXL according to the crystal
 class for the calculation of statistics and refinement.
 
 _reflns_Friedel_fraction is defined as the number of unique
 Friedel pairs measured divided by the number that would be
 possible theoretically, ignoring centric projections and
 systematic absences.
;
 
_computing_data_collection        ?
_computing_cell_refinement        ?
_computing_data_reduction         ?
_computing_structure_solution     ?
_computing_structure_refinement 'SHELXL-2014/6 (Sheldrick, 2014)'
_computing_molecular_graphics     ?
_computing_publication_material   ?
_refine_special_details           ?
_refine_ls_structure_factor_coef  Fsqd
_refine_ls_matrix_type            full
_refine_ls_weighting_scheme       calc
_refine_ls_weighting_details
'w=1/[\s^2^(Fo^2^)+(0.1000P)^2^] where P=(Fo^2^+2Fc^2^)/3'
_atom_sites_solution_primary      ?
_atom_sites_solution_secondary    ?
_atom_sites_solution_hydrogens    geom
_refine_ls_hydrogen_treatment     constr
_refine_ls_extinction_method      none
_refine_ls_extinction_coef        .
_refine_ls_number_reflns          4900
_refine_ls_number_parameters      245
_refine_ls_number_restraints      0
_refine_ls_R_factor_all           0.1130
_refine_ls_R_factor_gt            0.0725
_refine_ls_wR_factor_ref          0.2479
_refine_ls_wR_factor_gt           0.2117
_refine_ls_goodness_of_fit_ref    1.700
_refine_ls_restrained_S_all       1.700
_refine_ls_shift/su_max           0.004
_refine_ls_shift/su_mean          0.000
 
loop_
 _atom_site_label
 _atom_site_type_symbol
 _atom_site_fract_x
 _atom_site_fract_y
 _atom_site_fract_z
 _atom_site_U_iso_or_equiv
 _atom_site_adp_type
 _atom_site_occupancy
 _atom_site_site_symmetry_order  
 _atom_site_calc_flag
 _atom_site_refinement_flags_posn
 _atom_site_refinement_flags_adp
 _atom_site_refinement_flags_occupancy
 _atom_site_disorder_assembly
 _atom_site_disorder_group
S1 S 0.42522(3) 0.30146(6) 0.44770(4) 0.0470(3) Uani 1 1 d . . . . .
O3 O 0.44450(9) 0.42198(18) 0.46744(12) 0.0585(5) Uani 1 1 d . . . . .
O4 O 0.38643(8) 0.2431(2) 0.50171(12) 0.0608(5) Uani 1 1 d . . . . .
N2 N 0.39316(9) 0.30133(19) 0.35028(13) 0.0449(5) Uani 1 1 d . . . . .
N1 N 0.38317(16) 0.7355(3) 0.2822(2) 0.0823(9) Uani 1 1 d . . . . .
O1 O 0.35794(16) 0.7517(3) 0.3458(2) 0.1111(10) Uani 1 1 d . . . . .
C13 C 0.40294(10) 0.4003(2) 0.29356(15) 0.0435(6) Uani 1 1 d . . . . .
C14 C 0.38744(11) 0.5180(2) 0.31472(16) 0.0466(6) Uani 1 1 d . . . . .
H14 H 0.3696 0.5339 0.3647 0.056 Uiso 1 1 calc R U . . .
C18 C 0.42873(12) 0.3786(3) 0.21763(16) 0.0537(7) Uani 1 1 d . . . . .
H18 H 0.4395 0.2996 0.2036 0.064 Uiso 1 1 calc R U . . .
C1 C 0.48436(11) 0.2058(2) 0.43593(16) 0.0481(6) Uani 1 1 d . . . . .
C15 C 0.39922(13) 0.6105(3) 0.25973(18) 0.0555(7) Uani 1 1 d . . . . .
C6 C 0.47366(12) 0.1045(3) 0.38342(18) 0.0543(7) Uani 1 1 d . . . . .
C8 C 0.38255(13) 0.1815(3) 0.31451(18) 0.0539(7) Uani 1 1 d . . . . .
C16 C 0.42447(14) 0.5904(3) 0.18360(18) 0.0612(8) Uani 1 1 d . . . . .
H16 H 0.4318 0.6549 0.1474 0.073 Uiso 1 1 calc R U . . .
C17 C 0.43821(14) 0.4740(3) 0.16337(18) 0.0608(8) Uani 1 1 d . . . . .
H17 H 0.4543 0.4585 0.1119 0.073 Uiso 1 1 calc R U . . .
C7 C 0.41924(14) 0.0910(3) 0.33379(19) 0.0607(7) Uani 1 1 d . . . . .
H7 H 0.4092 0.0133 0.3139 0.073 Uiso 1 1 calc R U . . .
C2 C 0.53686(13) 0.2267(3) 0.4804(2) 0.0620(8) Uani 1 1 d . . . . .
H2 H 0.5427 0.2959 0.5142 0.074 Uiso 1 1 calc R U . . .
C5 C 0.51923(16) 0.0203(3) 0.3787(2) 0.0726(9) Uani 1 1 d . . . . .
H5 H 0.5139 -0.0492 0.3451 0.087 Uiso 1 1 calc R U . . .
O2 O 0.3959(2) 0.8182(3) 0.2350(2) 0.1449(17) Uani 1 1 d . . . . .
C9 C 0.32804(15) 0.1701(3) 0.2574(2) 0.0751(10) Uani 1 1 d . . . . .
H9A H 0.3301 0.2267 0.2103 0.090 Uiso 1 1 calc R U . . .
H9B H 0.3260 0.0881 0.2339 0.090 Uiso 1 1 calc R U . . .
C3 C 0.58112(15) 0.1406(4) 0.4732(2) 0.0783(10) Uani 1 1 d . . . . .
H3 H 0.6170 0.1521 0.5024 0.094 Uiso 1 1 calc R U . . .
C4 C 0.57126(16) 0.0394(4) 0.4229(3) 0.0852(11) Uani 1 1 d . . . . .
H4 H 0.6008 -0.0175 0.4188 0.102 Uiso 1 1 calc R U . . .
C10 C 0.2749(2) 0.1941(8) 0.3000(4) 0.157(3) Uani 1 1 d . . . . .
H10A H 0.2421 0.1853 0.2586 0.188 Uiso 1 1 calc R U . . .
H10B H 0.2756 0.2784 0.3192 0.188 Uiso 1 1 calc R U . . .
C12 C 0.2380(6) 0.0270(9) 0.3829(7) 0.221(5) Uani 1 1 d . . . . .
H12A H 0.2588 -0.0358 0.3540 0.265 Uiso 1 1 calc R U . . .
H12B H 0.2032 0.0426 0.3465 0.265 Uiso 1 1 calc R U . . .
C11 C 0.2651(4) 0.1120(16) 0.3757(6) 0.295(8) Uani 1 1 d . . . . .
H11A H 0.3039 0.0874 0.3964 0.354 Uiso 1 1 calc R U . . .
H11B H 0.2519 0.1675 0.4185 0.354 Uiso 1 1 calc R U . . .
C19 C 0.2148(4) -0.0418(13) 0.4627(7) 0.256(7) Uani 1 1 d . . . . .
H19A H 0.1773 -0.0083 0.4740 0.307 Uiso 1 1 calc R U . . .
H19B H 0.2093 -0.1274 0.4484 0.307 Uiso 1 1 calc R U . . .
C20 C 0.2469(4) -0.0345(13) 0.5281(8) 0.320(9) Uani 1 1 d . . . . .
H20A H 0.2863 -0.0493 0.5149 0.480 Uiso 1 1 calc R U . . .
H20B H 0.2356 -0.0944 0.5684 0.480 Uiso 1 1 calc R U . . .
H20C H 0.2440 0.0457 0.5522 0.480 Uiso 1 1 calc R U . . .
 
loop_
 _atom_site_aniso_label
 _atom_site_aniso_U_11
 _atom_site_aniso_U_22
 _atom_site_aniso_U_33
 _atom_site_aniso_U_23
 _atom_site_aniso_U_13
 _atom_site_aniso_U_12
S1 0.0631(4) 0.0481(5) 0.0301(4) 0.0003(3) 0.0062(3) -0.0016(3)
O3 0.0830(12) 0.0501(12) 0.0418(10) -0.0086(9) 0.0000(9) -0.0020(10)
O4 0.0736(12) 0.0702(14) 0.0405(10) 0.0082(9) 0.0171(9) -0.0001(10)
N2 0.0597(11) 0.0414(13) 0.0334(10) -0.0020(9) 0.0028(9) -0.0038(9)
N1 0.135(3) 0.0464(17) 0.0636(18) -0.0054(15) -0.0038(18) -0.0024(17)
O1 0.173(3) 0.0663(18) 0.097(2) -0.0138(17) 0.033(2) 0.0296(19)
C13 0.0529(13) 0.0438(15) 0.0339(12) 0.0011(11) 0.0021(10) 0.0012(11)
C14 0.0584(13) 0.0435(15) 0.0383(12) -0.0024(11) 0.0076(10) 0.0005(11)
C18 0.0691(15) 0.0553(18) 0.0373(13) -0.0037(12) 0.0081(11) 0.0120(13)
C1 0.0592(14) 0.0499(17) 0.0360(12) 0.0114(11) 0.0099(10) 0.0034(11)
C15 0.0752(16) 0.0399(15) 0.0502(15) -0.0020(12) -0.0044(13) -0.0043(13)
C6 0.0712(16) 0.0439(16) 0.0492(15) 0.0093(13) 0.0150(13) 0.0025(13)
C8 0.0730(17) 0.0426(16) 0.0458(15) -0.0048(12) 0.0011(13) -0.0098(13)
C16 0.089(2) 0.0548(19) 0.0401(14) 0.0114(13) 0.0072(13) -0.0101(15)
C17 0.0845(19) 0.063(2) 0.0369(14) 0.0075(13) 0.0178(13) 0.0042(15)
C7 0.0885(19) 0.0396(16) 0.0543(17) -0.0017(13) 0.0074(14) -0.0075(14)
C2 0.0646(16) 0.072(2) 0.0495(16) 0.0112(15) 0.0025(13) -0.0023(14)
C5 0.098(2) 0.0507(19) 0.071(2) 0.0107(16) 0.0211(18) 0.0144(16)
O2 0.287(5) 0.0435(16) 0.108(3) 0.0080(16) 0.042(3) -0.021(2)
C9 0.090(2) 0.066(2) 0.066(2) -0.0048(17) -0.0143(18) -0.0197(17)
C3 0.0680(18) 0.095(3) 0.072(2) 0.025(2) 0.0032(16) 0.0072(19)
C4 0.080(2) 0.091(3) 0.087(3) 0.031(2) 0.023(2) 0.024(2)
C10 0.085(3) 0.267(9) 0.115(5) -0.014(5) -0.012(3) -0.044(4)
C12 0.253(11) 0.199(9) 0.195(9) 0.066(7) -0.102(9) -0.033(8)
C11 0.175(7) 0.55(2) 0.155(7) 0.127(10) -0.048(5) -0.221(11)
C19 0.122(6) 0.433(19) 0.206(10) 0.079(11) -0.030(6) 0.062(9)
C20 0.155(8) 0.44(2) 0.38(2) 0.164(18) 0.092(12) 0.075(12)
 
_geom_special_details
;
 All esds (except the esd in the dihedral angle between two l.s. planes)
 are estimated using the full covariance matrix.  The cell esds are taken
 into account individually in the estimation of esds in distances, angles
 and torsion angles; correlations between esds in cell parameters are only
 used when they are defined by crystal symmetry.  An approximate (isotropic)
 treatment of cell esds is used for estimating esds involving l.s. planes.
;
 
loop_
 _geom_bond_atom_site_label_1
 _geom_bond_atom_site_label_2
 _geom_bond_distance
 _geom_bond_site_symmetry_2
 _geom_bond_publ_flag
S1 O3 1.420(2) . ?
S1 O4 1.428(2) . ?
S1 N2 1.657(2) . ?
S1 C1 1.742(3) . ?
N2 C13 1.431(3) . ?
N2 C8 1.441(3) . ?
N1 O1 1.206(4) . ?
N1 O2 1.219(4) . ?
N1 C15 1.467(4) . ?
C13 C14 1.383(4) . ?
C13 C18 1.392(4) . ?
C14 C15 1.371(4) . ?
C14 H14 0.9300 . ?
C18 C17 1.377(4) . ?
C18 H18 0.9300 . ?
C1 C2 1.378(4) . ?
C1 C6 1.394(4) . ?
C15 C16 1.386(4) . ?
C6 C5 1.405(4) . ?
C6 C7 1.442(4) . ?
C8 C7 1.325(4) . ?
C8 C9 1.503(4) . ?
C16 C17 1.355(4) . ?
C16 H16 0.9300 . ?
C17 H17 0.9300 . ?
C7 H7 0.9300 . ?
C2 C3 1.401(5) . ?
C2 H2 0.9300 . ?
C5 C4 1.364(6) . ?
C5 H5 0.9300 . ?
C9 C10 1.464(7) . ?
C9 H9A 0.9700 . ?
C9 H9B 0.9700 . ?
C3 C4 1.371(6) . ?
C3 H3 0.9300 . ?
C4 H4 0.9300 . ?
C10 C11 1.522(11) . ?
C10 H10A 0.9700 . ?
C10 H10B 0.9700 . ?
C12 C11 1.131(12) . ?
C12 C19 1.589(14) . ?
C12 H12A 0.9700 . ?
C12 H12B 0.9700 . ?
C11 H11A 0.9700 . ?
C11 H11B 0.9700 . ?
C19 C20 1.230(16) . ?
C19 H19A 0.9700 . ?
C19 H19B 0.9700 . ?
C20 H20A 0.9600 . ?
C20 H20B 0.9600 . ?
C20 H20C 0.9600 . ?
 
loop_
 _geom_angle_atom_site_label_1
 _geom_angle_atom_site_label_2
 _geom_angle_atom_site_label_3
 _geom_angle
 _geom_angle_site_symmetry_1
 _geom_angle_site_symmetry_3
 _geom_angle_publ_flag
O3 S1 O4 119.07(13) . . ?
O3 S1 N2 108.50(11) . . ?
O4 S1 N2 106.93(11) . . ?
O3 S1 C1 110.16(13) . . ?
O4 S1 C1 108.89(13) . . ?
N2 S1 C1 101.87(12) . . ?
C13 N2 C8 118.3(2) . . ?
C13 N2 S1 119.80(16) . . ?
C8 N2 S1 114.57(17) . . ?
O1 N1 O2 123.2(3) . . ?
O1 N1 C15 118.8(3) . . ?
O2 N1 C15 118.0(3) . . ?
C14 C13 C18 119.9(2) . . ?
C14 C13 N2 120.0(2) . . ?
C18 C13 N2 120.1(2) . . ?
C15 C14 C13 118.0(2) . . ?
C15 C14 H14 121.0 . . ?
C13 C14 H14 121.0 . . ?
C17 C18 C13 119.9(3) . . ?
C17 C18 H18 120.0 . . ?
C13 C18 H18 120.0 . . ?
C2 C1 C6 123.2(3) . . ?
C2 C1 S1 121.1(2) . . ?
C6 C1 S1 115.6(2) . . ?
C14 C15 C16 122.8(3) . . ?
C14 C15 N1 118.2(3) . . ?
C16 C15 N1 119.0(3) . . ?
C1 C6 C5 116.7(3) . . ?
C1 C6 C7 121.0(3) . . ?
C5 C6 C7 122.2(3) . . ?
C7 C8 N2 120.1(3) . . ?
C7 C8 C9 124.9(3) . . ?
N2 C8 C9 115.0(2) . . ?
C17 C16 C15 118.1(3) . . ?
C17 C16 H16 120.9 . . ?
C15 C16 H16 120.9 . . ?
C16 C17 C18 121.2(3) . . ?
C16 C17 H17 119.4 . . ?
C18 C17 H17 119.4 . . ?
C8 C7 C6 124.6(3) . . ?
C8 C7 H7 117.7 . . ?
C6 C7 H7 117.7 . . ?
C1 C2 C3 118.0(3) . . ?
C1 C2 H2 121.0 . . ?
C3 C2 H2 121.0 . . ?
C4 C5 C6 120.7(4) . . ?
C4 C5 H5 119.7 . . ?
C6 C5 H5 119.7 . . ?
C10 C9 C8 114.0(3) . . ?
C10 C9 H9A 108.7 . . ?
C8 C9 H9A 108.7 . . ?
C10 C9 H9B 108.8 . . ?
C8 C9 H9B 108.8 . . ?
H9A C9 H9B 107.6 . . ?
C4 C3 C2 119.7(3) . . ?
C4 C3 H3 120.1 . . ?
C2 C3 H3 120.1 . . ?
C5 C4 C3 121.7(3) . . ?
C5 C4 H4 119.2 . . ?
C3 C4 H4 119.2 . . ?
C9 C10 C11 115.2(8) . . ?
C9 C10 H10A 108.5 . . ?
C11 C10 H10A 108.5 . . ?
C9 C10 H10B 108.5 . . ?
C11 C10 H10B 108.5 . . ?
H10A C10 H10B 107.5 . . ?
C11 C12 C19 133.3(12) . . ?
C11 C12 H12A 103.9 . . ?
C19 C12 H12A 103.9 . . ?
C11 C12 H12B 103.9 . . ?
C19 C12 H12B 103.9 . . ?
H12A C12 H12B 105.4 . . ?
C12 C11 C10 132.5(10) . . ?
C12 C11 H11A 104.1 . . ?
C10 C11 H11A 104.1 . . ?
C12 C11 H11B 104.1 . . ?
C10 C11 H11B 104.1 . . ?
H11A C11 H11B 105.5 . . ?
C20 C19 C12 114.5(11) . . ?
C20 C19 H19A 108.6 . . ?
C12 C19 H19A 108.6 . . ?
C20 C19 H19B 108.6 . . ?
C12 C19 H19B 108.6 . . ?
H19A C19 H19B 107.6 . . ?
C19 C20 H20A 109.5 . . ?
C19 C20 H20B 109.5 . . ?
H20A C20 H20B 109.5 . . ?
C19 C20 H20C 109.5 . . ?
H20A C20 H20C 109.5 . . ?
H20B C20 H20C 109.5 . . ?
 
_refine_diff_density_max    0.827
_refine_diff_density_min   -0.419
_refine_diff_density_rms    0.113

_shelxl_version_number 2014/6

_shelx_res_file
;
TITL vbchem009_0m_a.res in C2/c
CELL  0.71073  23.1139  10.9419  15.7400   90.000   93.904   90.000
ZERR   52.000   0.0009   0.0005   0.0006    0.000    0.002    0.000
LATT 7
SYMM -X, Y, 1/2-Z
SFAC C  H  N  O  S
UNIT 52  52  52  52  52
L.S. 10
ACTA
BOND $H
FMAP 2
PLAN 1
TEMP 23.000
WGHT    0.100000
FVAR       0.23349
S1    5    0.425217    0.301463    0.447704    11.00000    0.06310    0.04810 =
         0.03009    0.00028    0.00620   -0.00160
O3    4    0.444505    0.421983    0.467441    11.00000    0.08302    0.05005 =
         0.04182   -0.00864    0.00002   -0.00204
O4    4    0.386426    0.243104    0.501706    11.00000    0.07356    0.07016 =
         0.04051    0.00823    0.01706   -0.00006
N2    3    0.393157    0.301327    0.350281    11.00000    0.05971    0.04144 =
         0.03343   -0.00200    0.00280   -0.00384
N1    3    0.383170    0.735529    0.282180    11.00000    0.13532    0.04644 =
         0.06362   -0.00538   -0.00379   -0.00238
O1    4    0.357943    0.751677    0.345809    11.00000    0.17289    0.06631 =
         0.09729   -0.01384    0.03333    0.02956
C13   1    0.402935    0.400288    0.293558    11.00000    0.05288    0.04378 =
         0.03385    0.00109    0.00213    0.00119
C14   1    0.387443    0.517966    0.314719    11.00000    0.05842    0.04350 =
         0.03833   -0.00236    0.00764    0.00051
AFIX  43
H14   2    0.369576    0.533861    0.364737    11.00000   -1.20000
AFIX   0
C18   1    0.428727    0.378555    0.217629    11.00000    0.06907    0.05526 =
         0.03733   -0.00375    0.00811    0.01204
AFIX  43
H18   2    0.439537    0.299618    0.203574    11.00000   -1.20000
AFIX   0
C1    1    0.484355    0.205778    0.435928    11.00000    0.05918    0.04993 =
         0.03597    0.01145    0.00991    0.00337
C15   1    0.399223    0.610459    0.259731    11.00000    0.07522    0.03987 =
         0.05022   -0.00199   -0.00444   -0.00433
C6    1    0.473659    0.104507    0.383424    11.00000    0.07116    0.04390 =
         0.04924    0.00932    0.01500    0.00255
C8    1    0.382554    0.181508    0.314509    11.00000    0.07297    0.04256 =
         0.04577   -0.00478    0.00108   -0.00982
C16   1    0.424468    0.590386    0.183598    11.00000    0.08889    0.05481 =
         0.04015    0.01135    0.00717   -0.01014
AFIX  43
H16   2    0.431774    0.654929    0.147405    11.00000   -1.20000
AFIX   0
C17   1    0.438213    0.474048    0.163366    11.00000    0.08453    0.06273 =
         0.03688    0.00746    0.01780    0.00416
AFIX  43
H17   2    0.454338    0.458454    0.111918    11.00000   -1.20000
AFIX   0
C7    1    0.419239    0.091017    0.333790    11.00000    0.08855    0.03961 =
         0.05434   -0.00174    0.00740   -0.00754
AFIX  43
H7    2    0.409181    0.013315    0.313910    11.00000   -1.20000
AFIX   0
C2    1    0.536861    0.226684    0.480394    11.00000    0.06460    0.07166 =
         0.04953    0.01118    0.00255   -0.00225
AFIX  43
H2    2    0.542733    0.295895    0.514181    11.00000   -1.20000
AFIX   0
C5    1    0.519231    0.020281    0.378675    11.00000    0.09831    0.05065 =
         0.07107    0.01073    0.02106    0.01444
AFIX  43
H5    2    0.513856   -0.049225    0.345056    11.00000   -1.20000
AFIX   0
O2    4    0.395890    0.818205    0.234983    11.00000    0.28724    0.04354 =
         0.10795    0.00803    0.04241   -0.02084
C9    1    0.328043    0.170069    0.257356    11.00000    0.09040    0.06636 =
         0.06577   -0.00482   -0.01429   -0.01967
AFIX  23
H9A   2    0.330102    0.226737    0.210266    11.00000   -1.20000
H9B   2    0.326048    0.088107    0.233855    11.00000   -1.20000
AFIX   0
C3    1    0.581117    0.140629    0.473201    11.00000    0.06801    0.09498 =
         0.07166    0.02548    0.00323    0.00717
AFIX  43
H3    2    0.617042    0.152060    0.502438    11.00000   -1.20000
AFIX   0
C4    1    0.571262    0.039449    0.422873    11.00000    0.08048    0.09064 =
         0.08669    0.03055    0.02263    0.02421
AFIX  43
H4    2    0.600797   -0.017530    0.418775    11.00000   -1.20000
AFIX   0
C10   1    0.274852    0.194141    0.299957    11.00000    0.08478    0.26716 =
         0.11538   -0.01427   -0.01174   -0.04355
AFIX  23
H10A  2    0.242060    0.185295    0.258574    11.00000   -1.20000
H10B  2    0.275580    0.278384    0.319190    11.00000   -1.20000
AFIX   0
C12   1    0.237988    0.027022    0.382854    11.00000    0.25303    0.19870 =
         0.19489    0.06620   -0.10187   -0.03280
AFIX  23
H12A  2    0.258831   -0.035786    0.353971    11.00000   -1.20000
H12B  2    0.203198    0.042569    0.346465    11.00000   -1.20000
AFIX   0
C11   1    0.265102    0.112025    0.375740    11.00000    0.17537    0.54808 =
         0.15461    0.12694   -0.04822   -0.22078
AFIX  23
H11A  2    0.303856    0.087433    0.396405    11.00000   -1.20000
H11B  2    0.251939    0.167502    0.418454    11.00000   -1.20000
AFIX   0
C19   1    0.214835   -0.041777    0.462722    11.00000    0.12202    0.43349 =
         0.20619    0.07928   -0.02982    0.06237
AFIX  23
H19A  2    0.177262   -0.008279    0.473977    11.00000   -1.20000
H19B  2    0.209306   -0.127387    0.448373    11.00000   -1.20000
AFIX   0
C20   1    0.246939   -0.034548    0.528140    11.00000    0.15539    0.43934 =
         0.37544    0.16394    0.09248    0.07522
AFIX 137
H20A  2    0.286265   -0.049267    0.514877    11.00000   -1.50000
H20B  2    0.235643   -0.094396    0.568425    11.00000   -1.50000
H20C  2    0.243964    0.045659    0.552174    11.00000   -1.50000
AFIX   0
HKLF 4

REM  vbchem009_0m_a.res in C2/c
REM R1 =  0.0725 for    3344 Fo > 4sig(Fo)  and  0.1130 for all    4900 data
REM    245 parameters refined using      0 restraints

END

WGHT      0.1265      5.7163

REM Highest difference peak  0.827,  deepest hole -0.419,  1-sigma level  0.113
Q1    1   0.2579  0.1815  0.3715  11.00000  0.05    0.83
;
_shelx_res_checksum   99291

_shelx_hkl_file
;
  -2   0   0   -2.30    0.10
   4   0   0 1693.53   35.70
   4   0   0 1488.75   35.90
   4   0   0 1538.95   36.30
  -4   0   0 1380.46   35.60
   6   0   0 9766.12  258.57
   6   0   0 9837.02  276.27
   6   0   0 9999.00  217.88
   6   0   0 9676.93  266.87
  -6   0   0 9729.93  217.88
  -6   0   0 9454.75  262.57
   6   0   0 9532.55  276.47
  -6   0   0 8835.52  217.48
   6   0   0 9489.85  262.97
   6   0   0 9836.22  217.98
  -8   0   0   13.50    1.20
   8   0   0   12.30    0.80
  -8   0   0   12.50    0.80
  -8   0   0   11.90    0.80
   8   0   0   12.40    1.00
   8   0   0   11.30    0.80
   8   0   0   10.10    1.10
   8   0   0   11.10    0.80
   8   0   0   14.30    0.90
  -8   0   0   12.40    0.90
  10   0   0  181.88    4.90
 -10   0   0  183.98    4.80
  10   0   0  175.88    4.80
 -10   0   0  186.08    4.90
  10   0   0  181.38    4.90
  10   0   0  183.28    5.20
 -10   0   0  179.08    5.00
  10   0   0  183.28    5.00
 -10   0   0  184.38    5.20
  10   0   0  177.68    5.20
  12   0   0  113.69    3.70
 -12   0   0  116.59    3.80
  12   0   0  122.19    4.10
  12   0   0  120.59    4.00
  12   0   0  118.29    3.60
 -12   0   0  123.29    3.70
  12   0   0  120.99    3.90
 -12   0   0  120.99    4.10
  12   0   0  114.79    3.60
 -12   0   0  123.69    3.70
  14   0   0    3.10    1.00
 -14   0   0    4.40    1.20
  14   0   0    0.70    0.90
  14   0   0    1.70    0.90
 -14   0   0    1.60    0.80
  14   0   0    2.90    0.90
  14   0   0    0.70    0.80
 -14   0   0    3.30    0.90
 -14   0   0    1.60    0.90
  14   0   0    3.00    1.20
  16   0   0    7.90    1.10
 -16   0   0    8.40    1.60
  16   0   0    7.90    1.10
 -16   0   0    6.70    1.00
 -16   0   0    7.80    1.10
  16   0   0    8.30    1.40
  16   0   0    6.00    1.20
  16   0   0    7.60    1.10
 -16   0   0    7.40    1.10
  18   0   0    3.50    1.00
 -18   0   0    2.90    0.90
  18   0   0    2.80    1.00
 -18   0   0    2.00    1.30
 -18   0   0    3.70    1.60
 -18   0   0    3.60    1.10
  18   0   0    3.20    1.30
  18   0   0    3.10    1.00
 -20   0   0  118.19    4.50
 -20   0   0  128.29    4.80
  20   0   0  127.79    4.60
 -20   0   0  120.99    4.50
  20   0   0  107.09    4.30
  20   0   0  116.89    5.30
 -20   0   0  119.79    5.20
  20   0   0  123.29    4.80
  22   0   0   80.99    4.60
 -22   0   0   82.49    4.00
  22   0   0   82.89    3.90
  22   0   0   79.39    3.80
 -22   0   0   80.49    3.70
 -22   0   0   68.29    3.40
  22   0   0   76.99    3.90
 -24   0   0    1.30    1.10
 -24   0   0   -0.80    1.60
  24   0   0    0.90    1.50
 -24   0   0    1.80    1.50
  24   0   0    0.80    1.50
  24   0   0   -0.70    1.10
 -24   0   0    2.70    1.20
  24   0   0    0.60    1.40
 -26   0   0    7.50    1.70
  26   0   0   12.10    2.70
 -26   0   0    8.30    2.10
 -26   0   0    9.50    1.70
  26   0   0    9.90    1.80
  26   0   0    9.10    1.80
 -28   0   0    8.10    2.10
 -28   0   0    7.10    2.30
 -28   0   0    8.80    1.80
  28   0   0    7.90    2.30
  28   0   0   14.20    3.00
  28   0   0    9.10    2.40
 -30   0   0    1.40    2.20
  30   0   0    1.50    1.90
  30   0   0    0.40    2.00
 -30   0   0   -0.20    1.90
  30   0   0   -0.50    2.10
 -30   0   0    0.30    1.90
   3  -1   0  177.28    4.00
   3  -1   0  166.28    4.00
   3  -1   0  172.28    4.00
   3  -1   0  192.88    4.60
   3  -1   0  168.98    4.10
  -3  -1   0  143.79    4.00
   3  -1   0  160.78    4.20
   5  -1   0 1100.59   24.60
  -5  -1   0 1082.19   25.30
   5  -1   0 1097.09   25.30
   5  -1   0 1085.69   24.40
   5  -1   0 1169.48   27.10
  -5  -1   0  889.61   24.40
   5  -1   0 1100.39   24.50
  -5  -1   0 1069.39   24.40
   5  -1   0 1070.59   24.40
   5  -1   0 1097.59   25.70
   5   1   0 1085.19   25.20
  -5   1   0 1081.89   24.50
   5   1   0 1061.69   24.70
  -7  -1   0 1017.70   23.70
  -7  -1   0 1043.10   23.80
   7  -1   0 1054.79   23.90
   7  -1   0 1007.30   24.40
   7  -1   0 1052.09   23.80
   7  -1   0 1038.20   23.70
  -7  -1   0 1073.59   23.90
   7  -1   0 1027.10   23.70
  -7  -1   0 1025.50   24.10
   7  -1   0 1033.00   23.70
   7  -1   0 1040.90   24.00
  -7   1   0 1030.90   23.80
   7   1   0 1044.20   23.80
   7   1   0 1061.09   23.70
  -7   1   0 1024.00   23.70
  -7   1   0 1037.60   23.70
  -7   1   0 1033.50   23.90
   7   1   0 1025.60   24.10
   7   1   0 1049.49   23.80
  -9  -1   0   30.50    1.50
  -9  -1   0   32.60    1.80
   9  -1   0   29.40    1.50
  -9  -1   0   28.90    1.40
   9  -1   0   31.00    1.40
  -9  -1   0   29.90    1.50
   9  -1   0   30.40    1.40
   9  -1   0   29.50    1.80
   9  -1   0   29.30    1.60
   9  -1   0   29.70    1.40
   9  -1   0   29.90    1.40
  -9   1   0   30.50    1.30
   9   1   0   28.00    1.40
  -9   1   0   28.60    1.30
   9   1   0   29.50    1.50
   9   1   0   29.80    1.80
  -9   1   0   28.80    1.40
   9   1   0   28.00    1.40
   9   1   0   29.50    1.50
  -9   1   0   30.20    1.50
  11  -1   0   32.40    1.70
  11  -1   0   30.30    1.40
  11  -1   0   30.10    1.90
 -11  -1   0   26.60    1.60
  11  -1   0   30.70    1.70
  11  -1   0   29.40    1.90
 -11  -1   0   29.40    1.40
 -11  -1   0   31.30    2.10
  11  -1   0   31.90    1.40
 -11  -1   0   27.90    1.70
  11  -1   0   27.00    1.60
 -11   1   0   30.60    1.40
  11   1   0   30.50    1.70
 -11   1   0   27.90    1.70
 -11   1   0   31.60    1.70
  11   1   0   26.90    1.90
  11   1   0   26.90    1.40
  11   1   0   29.00    1.60
  11   1   0   27.30    1.60
 -11   1   0   28.80    1.40
 -13  -1   0    1.00    0.70
  13  -1   0    1.70    0.80
  13  -1   0    0.50    0.60
 -13  -1   0    3.20    1.20
  13  -1   0    2.20    0.80
 -13  -1   0    1.70    0.60
  13  -1   0    1.10    0.90
  13  -1   0    2.00    1.00
  13  -1   0    2.50    1.10
 -13  -1   0   -1.20    0.80
  13  -1   0   -0.10    0.80
 -13   1   0    1.70    0.80
  13   1   0    1.50    0.70
  13   1   0   -0.20    0.80
  13   1   0    2.20    0.90
  13   1   0    2.40    0.80
 -13   1   0   -0.70    0.80
  13   1   0    0.60    0.60
 -13   1   0    2.10    1.00
 -13   1   0    2.10    0.80
 -15  -1   0   14.50    1.30
  15  -1   0   14.70    1.50
  15  -1   0   14.20    1.40
  15  -1   0   15.00    1.60
 -15  -1   0   13.90    1.50
  15  -1   0   15.90    1.90
 -15  -1   0   11.60    1.30
  15  -1   0   13.40    1.30
  15  -1   0   14.20    1.30
 -15  -1   0   15.30    2.10
 -15   1   0   16.30    1.30
 -15   1   0   13.40    1.40
  15   1   0   16.00    1.40
 -15   1   0   16.60    1.90
  15   1   0   15.50    1.60
  15   1   0   14.10    1.30
 -15   1   0   15.70    1.50
  15   1   0   14.60    2.00
 -17  -1   0   31.90    2.10
 -17  -1   0   33.00    2.30
  17  -1   0   32.00    1.90
  17  -1   0   31.50    2.20
  17  -1   0   32.00    2.30
 -17  -1   0   33.10    1.90
  17  -1   0   30.70    2.30
 -17  -1   0   35.00    2.80
  17  -1   0   35.00    2.20
 -17   1   0   34.80    2.80
  17   1   0   31.30    2.00
  17   1   0   30.30    1.90
 -17   1   0   32.60    2.10
 -17   1   0   32.70    2.10
  17   1   0   29.60    1.90
 -17   1   0   32.50    2.30
  17   1   0   31.30    2.80
 -19  -1   0   54.59    3.90
 -19  -1   0   40.70    2.40
 -19  -1   0   43.60    2.60
  19  -1   0   44.90    2.80
  19  -1   0   41.60    2.40
  19  -1   0   47.30    3.00
 -19  -1   0   50.39    2.90
  19  -1   0   44.50    3.40
  19  -1   0   45.60    2.50
 -19   1   0   47.10    2.80
  19   1   0   44.50    2.60
 -19   1   0   50.39    3.00
 -19   1   0   39.80    2.30
  19   1   0   42.60    2.50
  19   1   0   46.50    2.50
 -19   1   0   49.30    3.30
  19   1   0   38.30    2.90
  21  -1   0    4.60    1.90
  21  -1   0    4.10    1.20
 -21  -1   0    3.70    1.50
 -21  -1   0    3.50    1.60
  21  -1   0    3.90    1.20
  21  -1   0    5.40    1.50
 -21  -1   0    3.00    1.10
 -21   1   0    6.10    1.30
 -21   1   0    4.20    1.20
  21   1   0    4.80    1.60
  21   1   0    2.10    1.90
 -21   1   0    3.50    1.60
  21   1   0    3.30    1.10
 -21   1   0    1.50    1.00
  21   1   0    4.40    1.50
  23  -1   0    0.80    1.50
 -23  -1   0    2.80    1.10
 -23  -1   0    3.70    1.50
  23  -1   0    1.00    1.80
  23  -1   0    2.20    1.10
 -23  -1   0    1.70    1.60
  23  -1   0    1.90    1.50
  23   1   0    1.00    1.40
 -23   1   0    2.70    1.50
  23   1   0    1.80    2.00
 -23   1   0    0.80    1.40
 -23   1   0    0.00    1.50
 -23   1   0    1.30    1.10
  23   1   0    5.40    1.70
  23   1   0    1.80    1.20
  25  -1   0    3.20    1.80
 -25  -1   0   -0.50    1.70
 -25  -1   0    3.00    1.60
 -25  -1   0    1.80    1.20
  25  -1   0    2.30    1.70
  25  -1   0    2.30    2.10
 -25  -1   0    1.30    1.50
  25  -1   0    0.00    1.50
  25   1   0    3.20    1.60
 -25   1   0   -0.70    1.70
 -25   1   0    1.80    1.50
  25   1   0    1.30    1.60
 -25   1   0    2.30    1.60
  25   1   0    3.10    1.70
 -25   1   0   -0.50    1.50
  25   1   0   -1.20    1.60
  27  -1   0    1.50    1.80
 -27  -1   0    2.60    1.80
 -27  -1   0    1.50    1.80
 -27  -1   0   -2.10    1.80
  27  -1   0    3.60    2.20
  27  -1   0    2.00    1.50
  27   1   0    4.10    2.50
 -27   1   0   -0.10    1.80
  27   1   0    3.80    2.00
 -27   1   0   -1.00    1.20
  27   1   0    3.00    1.90
 -27   1   0    0.80    1.70
  29  -1   0    2.90    1.60
 -29  -1   0    1.70    1.40
 -29  -1   0    0.10    1.30
  29  -1   0    0.60    2.10
  29  -1   0    2.90    1.90
 -29  -1   0   -3.00    1.40
 -29   1   0    1.10    1.90
 -29   1   0   -0.60    1.90
  29   1   0    3.30    2.00
  29   1   0    2.00    1.60
 -29   1   0   -1.00    1.30
  29   1   0   -0.40    1.50
   0  -2   0  678.43   14.50
   0   2   0  595.54   15.20
   2  -2   0  152.48    3.60
   2  -2   0  126.99    3.80
  -2  -2   0  150.38    3.50
  -2  -2   0  149.79    3.50
  -2  -2   0  136.39    3.60
   2  -2   0  151.38    3.50
  -2  -2   0  153.98    3.50
   2  -2   0  146.89    3.90
   2   2   0  151.48    4.10
  -4  -2   0 3007.60   64.39
   4  -2   0 3082.39   64.29
   4  -2   0 2748.32   64.39
   4  -2   0 2986.50   64.09
  -4  -2   0 2860.41   64.69
   4  -2   0 2805.92   65.69
   4  -2   0 2752.62   63.89
  -4  -2   0 2872.51   64.09
   4  -2   0 2695.03   69.19
   4   2   0 2728.63   64.69
  -4   2   0 2546.05   65.19
   4   2   0 2772.32   66.89
   4   2   0 2342.57   64.79
  -6  -2   0   58.59    1.90
   6  -2   0   57.19    1.80
  -6  -2   0   49.40    2.30
  -6  -2   0   53.29    1.80
  -6  -2   0   54.59    1.80
   6  -2   0   52.39    1.70
   6  -2   0   55.09    2.50
   6  -2   0   53.69    2.10
   6  -2   0   55.49    1.90
   6  -2   0   57.19    1.70
   6  -2   0   54.59    1.70
   6   2   0   55.99    1.80
   6   2   0   57.19    2.40
   6   2   0   58.99    2.30
  -6   2   0   57.09    1.80
   6   2   0   55.59    1.80
  -6   2   0   58.09    1.80
   6   2   0   57.29    1.80
   8  -2   0  332.37    8.20
   8  -2   0  342.37    8.30
  -8  -2   0  339.77    8.30
   8  -2   0  332.07    9.20
   8  -2   0  328.47    8.20
  -8  -2   0  336.47    8.80
   8  -2   0  340.27    8.60
   8  -2   0  329.37    8.40
   8  -2   0  340.27    8.20
  -8  -2   0  336.67    8.20
  -8  -2   0  345.57    8.40
   8   2   0  324.87    8.50
  -8   2   0  340.47    8.20
  -8   2   0  348.77    8.30
   8   2   0  339.37    8.20
   8   2   0  341.57    8.40
  -8   2   0  345.07    8.50
   8   2   0  340.77    8.80
  -8   2   0  332.77    8.10
   8   2   0  351.36    8.30
  10  -2   0   74.59    3.40
 -10  -2   0   78.69    2.70
 -10  -2   0   78.29    2.70
  10  -2   0   79.99    2.50
  10  -2   0   75.69    2.60
  10  -2   0   75.59    2.80
 -10  -2   0   78.49    2.60
  10  -2   0   75.09    2.60
  10  -2   0   76.19    2.90
 -10  -2   0   79.99    3.20
  10  -2   0   74.19    2.50
  10   2   0   79.79    2.80
  10   2   0   80.59    2.60
  10   2   0   76.19    2.60
 -10   2   0   79.39    2.80
 -10   2   0   79.59    2.50
  10   2   0   81.49    2.80
  10   2   0   77.89    3.00
 -10   2   0   78.79    2.60
 -10   2   0   76.09    2.50
 -12  -2   0    7.10    1.40
  12  -2   0    6.50    1.50
 -12  -2   0    6.20    1.10
  12  -2   0    6.20    1.00
 -12  -2   0    6.30    1.00
  12  -2   0    8.50    0.90
  12  -2   0    8.20    1.20
 -12  -2   0    5.30    0.80
  12  -2   0    7.90    1.00
  12  -2   0    6.80    0.90
  12  -2   0    5.30    0.90
  12   2   0    4.50    0.80
  12   2   0    8.00    1.10
 -12   2   0    6.30    1.00
  12   2   0    8.30    1.00
  12   2   0    8.00    1.20
 -12   2   0    4.80    0.80
 -12   2   0    7.20    0.80
  12   2   0    8.30    1.20
 -12   2   0    6.80    1.10
 -14  -2   0   18.20    1.50
  14  -2   0   14.70    1.30
  14  -2   0   14.10    1.80
 -14  -2   0   18.10    2.20
  14  -2   0   13.40    1.20
 -14  -2   0   14.90    1.60
 -14  -2   0   18.70    1.70
  14  -2   0   12.30    2.10
  14  -2   0   12.10    1.40
  14  -2   0   14.70    1.20
  14  -2   0   13.40    1.70
  14   2   0   20.00    1.60
 -14   2   0   11.60    1.10
 -14   2   0   14.60    1.70
  14   2   0   16.50    2.10
 -14   2   0   14.80    1.30
  14   2   0   18.40    1.60
 -14   2   0   15.70    1.60
  14   2   0   19.70    1.40
  16  -2   0   -1.30    1.10
 -16  -2   0    1.60    1.50
  16  -2   0   -0.40    0.90
 -16  -2   0   -0.20    0.60
  16  -2   0   -0.50    0.90
  16  -2   0   -1.80    1.30
 -16  -2   0   -1.80    0.90
 -16  -2   0   -0.50    1.00
  16  -2   0   -1.80    0.90
  16  -2   0   -1.20    0.90
  16  -2   0   -0.80    1.20
 -16   2   0   -0.30    0.80
 -16   2   0    0.10    0.90
  16   2   0   -0.30    0.70
  16   2   0   -1.50    0.60
 -16   2   0   -1.40    0.90
 -16   2   0    0.30    1.30
  16   2   0   -1.40    0.60
  16   2   0    0.60    1.10
  18  -2   0   -0.80    1.40
 -18  -2   0   -0.40    1.20
 -18  -2   0    0.40    1.90
  18  -2   0    0.80    1.50
  18  -2   0    2.50    1.20
 -18  -2   0    0.70    0.90
  18  -2   0    0.00    1.20
 -18  -2   0   -0.10    1.00
  18  -2   0    0.80    0.90
  18  -2   0    1.30    1.20
  18   2   0   -1.10    1.10
 -18   2   0    2.40    1.50
 -18   2   0    0.10    0.80
  18   2   0    1.30    1.00
  18   2   0   -0.50    1.20
 -18   2   0    1.00    0.90
 -18   2   0    1.60    1.10
 -18   2   0    3.30    1.20
  18   2   0    2.30    1.30
 -20  -2   0   27.60    2.60
 -20  -2   0   25.10    3.10
  20  -2   0   26.40    2.50
  20  -2   0   27.80    2.40
  20  -2   0   24.20    2.50
 -20  -2   0   24.20    2.00
  20  -2   0   30.00    2.50
 -20  -2   0   29.70    2.60
  20  -2   0   23.50    2.40
 -20   2   0   29.00    2.30
  20   2   0   22.90    2.60
  20   2   0   26.00    2.10
 -20   2   0   22.60    2.30
 -20   2   0   31.60    2.60
 -20   2   0   24.80    3.30
  20   2   0   22.60    2.50
  20   2   0   25.90    2.10
 -20   2   0   25.30    2.40
  22  -2   0    1.70    1.50
  22  -2   0    2.00    1.10
 -22  -2   0    2.50    1.10
  22  -2   0    2.10    1.40
  22  -2   0    2.90    1.80
  22  -2   0    0.50    1.40
 -22  -2   0   -0.80    1.30
 -22  -2   0    1.10    1.60
 -22   2   0    0.30    1.00
  22   2   0    0.40    1.40
 -22   2   0    1.50    1.40
  22   2   0    0.20    1.90
 -22   2   0    0.30    1.40
  22   2   0   -0.90    1.40
  22   2   0    1.90    1.20
 -22   2   0   -1.10    1.30
 -24  -2   0    2.30    1.20
 -24  -2   0    3.10    1.60
  24  -2   0    2.90    2.00
  24  -2   0    0.30    1.60
 -24  -2   0    0.90    1.70
  24  -2   0    3.20    1.60
  24  -2   0    2.10    1.60
 -24   2   0   -0.30    1.50
  24   2   0    2.00    2.20
 -24   2   0    1.50    1.60
 -24   2   0    0.40    1.50
 -24   2   0    3.60    1.30
  24   2   0    2.50    1.60
  24   2   0    4.70    1.70
  24   2   0    2.90    1.40
 -26  -2   0   14.10    2.00
  26  -2   0   17.10    3.00
 -26  -2   0   12.20    1.90
 -26  -2   0   12.40    2.50
  26  -2   0   17.40    2.40
  26  -2   0   13.00    2.00
 -26   2   0   11.30    2.20
  26   2   0   12.80    2.00
  26   2   0   14.70    2.60
 -26   2   0   14.30    2.40
  26   2   0   15.10    2.10
 -26   2   0   14.00    2.00
 -28  -2   0    3.50    2.30
  28  -2   0    6.90    2.50
  28  -2   0    1.10    2.00
 -28  -2   0    0.20    1.80
 -28  -2   0    4.90    2.00
  28  -2   0    7.40    2.20
 -28   2   0    1.30    1.90
 -28   2   0    2.30    2.00
 -28   2   0   -2.40    1.70
  28   2   0    5.70    2.70
  28   2   0   -0.10    2.00
  28   2   0    1.00    2.00
  30  -2   0    1.10    1.60
  30  -2   0    1.40    2.10
  30  -2   0    6.30    2.60
 -30  -2   0    1.00    2.40
 -30  -2   0    0.70    1.40
 -30  -2   0    3.50    2.10
  30   2   0    0.90    1.60
 -30   2   0    2.60    2.10
  30   2   0   -0.80    2.10
 -30   2   0    1.70    2.10
  30   2   0    7.10    2.80
 -30   2   0    0.20    2.00
  -1  -3   0    5.40    0.70
   1  -3   0    4.40    0.80
   1  -3   0    4.90    0.90
   1  -3   0    7.50    0.60
  -1  -3   0    5.80    0.50
   1  -3   0    6.00    0.20
  -1  -3   0    6.00    0.30
   1   3   0    5.50    0.90
   1   3   0    5.40    1.00
  -1   3   0    4.60    0.70
  -1   3   0    5.10    1.00
  -3  -3   0  339.87    7.50
   3  -3   0  326.77    8.10
  -3  -3   0  316.27    7.50
  -3  -3   0  332.17    7.60
   3  -3   0  311.27    8.10
   3  -3   0  323.57    8.80
  -3  -3   0  321.67    8.30
  -3  -3   0  325.77    7.80
   3  -3   0  324.67    7.70
   3  -3   0  336.07    7.60
   3  -3   0  328.27    7.50
   3  -3   0  320.97    7.50
   3   3   0  317.57    7.50
  -3   3   0  330.17    7.50
  -3   3   0  311.07    8.10
   3   3   0  328.47    8.50
  -3   3   0  327.57    8.90
   3   3   0  311.07    8.20
   5  -3   0  236.28    6.30
  -5  -3   0  239.98    5.80
   5  -3   0  242.98    5.80
   5  -3   0  235.68    7.10
  -5  -3   0  239.68    5.80
  -5  -3   0  237.48    6.50
   5  -3   0  241.28    5.80
   5  -3   0  238.88    5.70
   5  -3   0  231.38    5.80
   5  -3   0  234.58    6.20
  -5  -3   0  236.38    6.00
   5   3   0  243.78    5.90
   5   3   0  242.38    5.80
   5   3   0  230.18    6.50
  -5   3   0  241.88    6.40
   5   3   0  238.28    6.60
   5   3   0  246.08    5.80
  -5   3   0  244.08    5.80
  -5   3   0  240.28    5.80
   7  -3   0  292.27    7.60
   7  -3   0  293.07    7.10
  -7  -3   0  292.87    7.20
   7  -3   0  293.77    7.20
   7  -3   0  296.97    7.70
  -7  -3   0  301.37    7.30
   7  -3   0  292.87    7.20
  -7  -3   0  295.17    7.40
  -7  -3   0  291.97    8.00
   7  -3   0  300.27    7.30
   7  -3   0  277.07    8.50
   7   3   0  294.87    8.00
   7   3   0  304.87    7.30
   7   3   0  298.47    7.30
   7   3   0  307.27    7.30
  -7   3   0  303.47    7.30
   7   3   0  286.27    7.80
  -7   3   0  298.87    7.80
  -7   3   0  296.17    7.20
  -9  -3   0   93.39    3.00
   9  -3   0   90.59    4.00
  -9  -3   0   89.59    2.80
  -9  -3   0   89.29    3.00
   9  -3   0   93.49    2.80
   9  -3   0   94.89    2.90
  -9  -3   0   91.39    3.60
   9  -3   0   92.49    2.80
   9  -3   0   92.59    2.90
   9  -3   0   91.69    3.30
   9  -3   0   92.89    3.20
  -9   3   0   92.39    2.90
  -9   3   0   98.79    2.90
   9   3   0   91.69    2.80
   9   3   0   98.99    3.00
  -9   3   0  100.09    3.50
  -9   3   0   89.69    2.80
   9   3   0   94.09    3.60
   9   3   0   93.49    2.90
   9   3   0   93.69    3.50
  11  -3   0  141.39    4.00
 -11  -3   0  141.69    4.20
  11  -3   0  138.19    4.60
 -11  -3   0  141.79    4.90
  11  -3   0  143.39    5.40
  11  -3   0  139.69    4.00
  11  -3   0  145.39    4.20
  11  -3   0  141.49    4.10
 -11  -3   0  138.09    4.40
  11  -3   0  142.69    4.40
 -11  -3   0  147.59    4.30
  11   3   0  144.09    5.00
 -11   3   0  139.19    4.00
  11   3   0  142.19    4.60
 -11   3   0  144.19    4.20
 -11   3   0  145.69    4.20
  11   3   0  140.79    4.30
 -11   3   0  142.89    4.00
  11   3   0  147.99    4.20
 -11   3   0  148.89    4.60
  11   3   0  140.49    4.20
  13  -3   0  126.89    3.90
 -13  -3   0  137.19    4.20
 -13  -3   0  138.19    4.30
  13  -3   0  133.89    4.40
  13  -3   0  134.49    4.30
  13  -3   0  129.89    4.60
 -13  -3   0  136.39    5.00
 -13  -3   0  134.89    4.40
  13  -3   0  131.49    4.10
  13  -3   0  133.69    5.40
  13  -3   0  134.59    4.00
 -13   3   0  133.69    4.00
 -13   3   0  130.49    4.00
  13   3   0  136.99    5.00
 -13   3   0  132.69    4.20
 -13   3   0  132.99    4.10
 -13   3   0  139.89    4.60
  13   3   0  140.09    4.20
  13   3   0  138.59    4.20
  13   3   0  136.29    4.30
  15  -3   0   50.99    2.30
  15  -3   0   49.70    2.40
  15  -3   0   50.39    2.90
 -15  -3   0   51.39    3.20
 -15  -3   0   46.90    2.40
 -15  -3   0   49.60    2.30
  15  -3   0   50.29    2.50
  15  -3   0   47.80    3.40
 -15  -3   0   48.90    2.60
  15  -3   0   47.70    2.70
  15  -3   0   49.60    2.30
 -15   3   0   52.09    2.30
 -15   3   0   50.49    2.40
  15   3   0   47.60    2.30
 -15   3   0   49.30    2.70
  15   3   0   50.79    2.30
 -15   3   0   50.79    2.30
  15   3   0   45.30    2.30
 -15   3   0   49.80    2.50
  15   3   0   50.99    3.30
  17  -3   0   23.20    2.80
  17  -3   0   21.70    2.10
 -17  -3   0   26.20    3.20
  17  -3   0   22.60    2.40
 -17  -3   0   21.40    2.30
 -17  -3   0   24.90    2.10
  17  -3   0   26.10    2.00
 -17  -3   0   20.70    1.80
  17  -3   0   24.90    2.10
  17  -3   0   24.90    2.60
  17  -3   0   21.20    1.70
  17   3   0   22.60    1.90
 -17   3   0   20.60    1.80
 -17   3   0   27.50    2.00
  17   3   0   22.80    1.80
 -17   3   0   23.10    1.60
 -17   3   0   26.60    2.60
  17   3   0   26.30    2.50
  17   3   0   25.80    2.20
 -17   3   0   25.50    1.90
  19  -3   0    6.60    1.50
 -19  -3   0    7.70    1.30
  19  -3   0    8.30    1.50
  19  -3   0    6.40    1.90
  19  -3   0    6.80    1.30
 -19  -3   0    6.50    1.30
  19  -3   0    9.60    2.00
 -19  -3   0    7.70    2.10
  19  -3   0    9.40    1.60
 -19  -3   0    8.00    1.80
 -19   3   0    7.50    1.40
  19   3   0    7.10    1.30
  19   3   0    7.60    1.80
 -19   3   0    7.80    1.90
  19   3   0    9.80    1.70
 -19   3   0    7.10    1.30
  19   3   0    6.70    1.60
 -19   3   0    8.80    1.50
 -19   3   0    8.90    1.50
 -21  -3   0    0.50    0.90
  21  -3   0    0.40    1.30
  21  -3   0    0.10    1.00
  21  -3   0    0.60    1.40
 -21  -3   0    3.60    2.00
 -21  -3   0    0.30    1.20
  21  -3   0    2.40    1.70
 -21  -3   0   -0.50    1.00
  21  -3   0    1.10    1.00
 -21   3   0    0.70    1.30
  21   3   0    0.30    1.00
  21   3   0    1.80    1.60
  21   3   0    0.30    1.00
  21   3   0    1.30    1.10
 -21   3   0   -0.30    1.30
 -21   3   0    1.20    1.00
 -21   3   0   -0.20    1.00
  23  -3   0    4.40    1.60
  23  -3   0    3.70    2.00
 -23  -3   0    1.70    1.20
 -23  -3   0    4.80    1.90
  23  -3   0    2.50    1.60
  23  -3   0    1.90    1.60
 -23  -3   0    3.50    1.20
  23  -3   0    0.50    1.60
 -23   3   0    1.40    1.60
 -23   3   0    1.90    1.50
  23   3   0    1.20    1.20
  23   3   0    3.00    1.70
 -23   3   0    1.70    1.40
 -23   3   0    1.80    1.60
  23   3   0    1.00    1.60
  23   3   0    3.70    1.40
  25  -3   0   -1.20    1.70
  25  -3   0    2.50    1.70
 -25  -3   0   -0.60    2.00
  25  -3   0   -1.10    1.40
 -25  -3   0   -0.10    1.20
  25  -3   0    1.00    1.20
  25  -3   0    2.80    2.10
 -25  -3   0    0.10    1.10
  25   3   0    1.00    1.30
 -25   3   0   -0.10    1.10
  25   3   0    1.40    1.30
 -25   3   0   -0.90    1.60
  25   3   0    0.30    1.70
 -25   3   0   -0.30    1.00
  25   3   0   -0.50    1.10
 -25   3   0   -0.60    1.60
  27  -3   0    5.40    2.10
  27  -3   0    7.40    2.10
 -27  -3   0    7.20    2.00
 -27  -3   0    8.00    2.50
  27  -3   0    5.90    1.90
 -27  -3   0    4.00    1.50
 -27   3   0    5.80    2.00
  27   3   0    6.20    2.20
  27   3   0    5.90    2.20
 -27   3   0    5.90    2.00
 -27   3   0    3.70    2.10
  27   3   0    6.60    1.80
  29  -3   0   10.90    2.80
  29  -3   0    5.70    2.20
 -29  -3   0    3.00    1.60
 -29  -3   0    2.80    1.90
  29  -3   0    6.50    1.90
 -29  -3   0    7.40    2.10
 -29   3   0    3.50    2.20
  29   3   0    3.80    1.80
  29   3   0    9.70    2.40
 -29   3   0    4.80    2.00
  29   3   0    9.40    3.00
   0  -4   0  648.64   15.00
   0  -4   0  650.13   15.60
   0  -4   0  638.74   16.20
   0   4   0  639.44   16.30
   0   4   0  636.84   15.60
   0   4   0  650.03   14.70
   2  -4   0   10.50    0.50
  -2  -4   0   10.00    1.20
   2  -4   0   11.50    1.40
  -2  -4   0   10.30    0.50
   2  -4   0    9.10    1.00
  -2  -4   0   12.30    0.60
  -2  -4   0   10.60    0.90
  -2  -4   0   10.50    1.40
   2  -4   0   11.00    0.80
  -2  -4   0   11.80    0.50
   2  -4   0   11.50    0.40
  -2   4   0   10.40    0.40
  -2   4   0   12.40    1.30
  -2   4   0   12.50    0.60
   2   4   0   14.50    1.60
   2   4   0   13.40    0.70
  -2   4   0   10.30    0.40
  -2   4   0   11.10    1.50
   2   4   0   10.90    1.50
   4  -4   0   20.10    2.00
  -4  -4   0   22.70    0.90
   4  -4   0   21.80    0.80
  -4  -4   0   20.70    1.30
   4  -4   0   21.20    0.80
   4  -4   0   21.30    1.30
  -4  -4   0   20.30    0.90
   4  -4   0   21.10    1.00
   4  -4   0   22.20    0.90
  -4  -4   0   18.60    1.70
  -4  -4   0   19.30    1.50
  -4   4   0   21.60    0.80
  -4   4   0   22.80    0.90
  -4   4   0   22.40    2.20
   4   4   0   20.70    0.90
   4   4   0   21.70    1.80
   4   4   0   23.10    1.00
  -4   4   0   20.60    1.50
   4   4   0   21.20    1.90
   6  -4   0   98.89    2.70
   6  -4   0  102.89    2.80
  -6  -4   0   97.09    3.70
   6  -4   0  102.39    4.40
  -6  -4   0   96.99    3.10
  -6  -4   0   99.69    2.80
   6  -4   0   97.29    3.30
  -6  -4   0   98.29    2.80
   6  -4   0  100.49    2.80
   6  -4   0  101.69    2.80
   6  -4   0  100.49    3.50
   6   4   0  103.29    2.90
   6   4   0   98.79    3.80
  -6   4   0  102.29    2.80
   6   4   0  100.89    2.90
  -6   4   0  100.19    3.50
   6   4   0  102.19    2.80
  -6   4   0  102.79    4.40
  -6   4   0  100.39    2.80
   6   4   0   97.59    3.60
  -8  -4   0  472.65   11.20
   8  -4   0  461.25   11.10
   8  -4   0  459.55   11.90
   8  -4   0  459.45   13.00
   8  -4   0  469.35   11.20
  -8  -4   0  464.05   11.50
  -8  -4   0  470.95   12.20
   8  -4   0  466.75   11.10
  -8  -4   0  466.45   11.30
   8  -4   0  470.85   11.70
   8  -4   0  469.75   11.20
   8   4   0  464.95   11.30
  -8   4   0  465.85   11.10
   8   4   0  468.15   12.10
   8   4   0  481.05   11.30
   8   4   0  474.55   11.20
  -8   4   0  466.45   11.20
  -8   4   0  473.55   12.00
  -8   4   0  479.95   11.20
   8   4   0  464.45   12.20
  -8   4   0  472.75   13.20
  10  -4   0   12.90    1.10
 -10  -4   0   14.40    1.20
 -10  -4   0   11.30    1.30
  10  -4   0   13.80    1.30
 -10  -4   0   14.10    2.00
  10  -4   0   11.30    1.10
  10  -4   0   11.80    1.80
 -10  -4   0   15.20    1.20
  10  -4   0   14.40    1.20
  10  -4   0   14.80    1.10
  10  -4   0   12.80    1.60
 -10   4   0   15.20    1.70
 -10   4   0   14.40    1.10
  10   4   0   13.30    1.20
 -10   4   0   14.40    1.10
 -10   4   0   15.00    2.20
 -10   4   0   12.20    1.00
  10   4   0   11.90    1.20
  10   4   0   12.20    1.20
  10   4   0   13.90    2.20
  10   4   0   13.50    1.90
 -12  -4   0  188.98    5.60
  12  -4   0  189.78    5.20
  12  -4   0  181.68    5.30
  12  -4   0  184.48    5.30
 -12  -4   0  193.78    5.30
 -12  -4   0  193.98    6.40
  12  -4   0  180.98    6.80
  12  -4   0  187.28    5.10
  12  -4   0  186.38    5.90
 -12  -4   0  182.88    5.40
  12  -4   0  192.48    5.70
  12   4   0  190.38    5.30
 -12   4   0  195.68    6.10
 -12   4   0  180.88    6.90
 -12   4   0  185.58    5.30
 -12   4   0  186.38    5.30
 -12   4   0  192.18    5.80
  12   4   0  187.08    5.40
 -12   4   0  190.98    5.20
 -12   4   0  185.18    5.10
  12   4   0  191.28    6.20
  12   4   0  189.88    5.30
  12   4   0  184.18    6.10
  14  -4   0    6.00    1.10
 -14  -4   0    7.60    1.80
  14  -4   0    5.80    2.00
  14  -4   0    7.60    1.10
  14  -4   0    7.30    1.40
  14  -4   0    6.10    1.40
  14  -4   0    5.80    0.90
 -14  -4   0    5.70    1.10
 -14  -4   0    6.30    1.30
 -14  -4   0    5.80    1.10
  14  -4   0    5.20    0.90
 -14   4   0    5.10    1.10
  14   4   0    6.60    1.50
  14   4   0    6.60    1.20
 -14   4   0    4.90    0.90
 -14   4   0    8.30    1.60
  14   4   0    5.90    1.10
 -14   4   0    5.60    2.00
 -14   4   0    6.30    0.90
 -14   4   0    9.20    1.10
 -14   4   0    6.20    1.40
 -16  -4   0   28.80    2.10
  16  -4   0   31.20    2.00
  16  -4   0   28.30    2.10
  16  -4   0   27.00    1.70
 -16  -4   0   26.60    2.10
  16  -4   0   31.40    2.50
  16  -4   0   28.20    1.90
 -16  -4   0   28.80    3.00
  16  -4   0   29.20    2.70
  16  -4   0   29.50    3.20
 -16  -4   0   26.70    1.90
 -16   4   0   27.90    2.20
  16   4   0   30.90    2.70
 -16   4   0   33.60    2.90
 -16   4   0   28.40    3.20
 -16   4   0   31.70    2.00
  16   4   0   29.70    2.20
 -16   4   0   30.90    2.10
 -16   4   0   32.40    1.90
  16   4   0   30.60    2.20
 -16   4   0   30.30    2.50
  16   4   0   29.50    1.90
 -18  -4   0   20.50    1.80
  18  -4   0   17.70    2.20
  18  -4   0   17.30    1.90
  18  -4   0   16.70    2.40
  18  -4   0   22.10    2.10
  18  -4   0   19.40    2.00
 -18  -4   0   18.10    2.20
 -18  -4   0   18.30    1.90
  18  -4   0   17.10    1.70
  18  -4   0   20.20    3.10
 -18  -4   0   17.90    2.60
  18   4   0   17.90    1.80
 -18   4   0   22.60    3.50
 -18   4   0   20.50    2.50
 -18   4   0   22.60    2.10
  18   4   0   20.20    2.70
 -18   4   0   18.60    2.40
  18   4   0   20.00    1.80
  18   4   0   20.90    2.10
 -18   4   0   20.60    1.90
 -18   4   0   20.40    1.90
 -18   4   0   16.00    1.80
  20  -4   0    0.80    1.20
  20  -4   0    2.30    1.60
  20  -4   0   -0.30    1.30
  20  -4   0   -0.20    0.90
 -20  -4   0    0.40    1.30
  20  -4   0   -0.10    1.20
 -20  -4   0    1.70    1.60
 -20  -4   0    0.20    1.30
 -20  -4   0    1.80    1.80
  20   4   0   -0.70    1.40
 -20   4   0    0.60    1.20
  20   4   0    0.20    2.00
 -20   4   0   -0.60    1.20
 -20   4   0    1.50    1.00
  20   4   0   -1.00    1.20
 -20   4   0    0.50    0.80
 -20   4   0   -1.40    1.70
  20   4   0    1.40    1.50
  22  -4   0    9.40    1.70
  22  -4   0    9.00    1.80
  22  -4   0    9.60    2.20
  22  -4   0    5.50    1.70
 -22  -4   0   10.40    1.90
 -22  -4   0    8.80    1.60
  22  -4   0    9.00    1.70
 -22  -4   0    8.80    1.80
 -22   4   0    5.30    1.60
  22   4   0    7.80    1.80
  22   4   0    9.40    1.70
 -22   4   0    7.40    1.60
  22   4   0   11.30    2.00
 -22   4   0    7.30    1.60
  22   4   0    6.20    2.00
 -22   4   0    9.90    2.00
 -22   4   0    9.30    2.60
 -24  -4   0   -0.10    1.90
  24  -4   0    0.40    1.50
  24  -4   0    3.90    2.00
  24  -4   0    4.70    1.70
  24  -4   0    1.70    1.60
 -24  -4   0    2.40    1.60
 -24  -4   0   -0.10    1.20
  24  -4   0    2.60    1.60
  24   4   0    3.70    1.70
  24   4   0    0.70    1.30
  24   4   0    2.20    1.60
 -24   4   0    0.40    1.40
 -24   4   0    0.60    2.30
 -24   4   0    2.20    1.50
  24   4   0    3.70    2.00
 -24   4   0   -0.70    1.50
 -24   4   0   -0.60    1.50
 -26  -4   0    2.80    1.70
  26  -4   0    4.40    1.50
 -26  -4   0    3.00    1.80
  26  -4   0    7.80    2.30
  26  -4   0    4.50    1.90
 -26   4   0    2.30    1.50
 -26   4   0    4.20    1.80
  26   4   0    2.70    1.60
  26   4   0    7.30    2.30
 -26   4   0    3.20    2.70
  26   4   0    8.70    2.20
 -28  -4   0    3.90    2.10
  28  -4   0    9.60    2.60
  28  -4   0    1.40    1.90
 -28  -4   0    2.10    2.40
 -28  -4   0    3.40    1.90
  28  -4   0    1.90    1.60
 -28   4   0    2.70    2.80
  28   4   0    6.80    2.20
  28   4   0    3.60    1.80
 -28   4   0   -1.10    1.40
  28   4   0    7.50    2.40
 -28   4   0    2.10    1.50
   1  -5   0   56.79    1.90
   1  -5   0   61.19    3.20
  -1  -5   0   57.79    3.10
   1  -5   0   55.09    2.60
  -1  -5   0   56.49    2.60
  -1  -5   0   59.49    2.10
  -1  -5   0   59.19    1.60
   1  -5   0   59.29    1.60
   1   5   0   57.99    1.70
  -1   5   0   59.19    1.70
  -1   5   0   57.79    3.30
   1   5   0   56.39    3.20
   1   5   0   56.09    2.70
  -1   5   0   55.99    2.70
   3  -5   0    2.80    0.30
  -3  -5   0    1.30    0.40
  -3  -5   0    1.40    1.00
   3  -5   0    2.40    0.60
   3  -5   0    2.70    1.40
  -3  -5   0    2.40    0.40
  -3  -5   0    2.30    0.30
  -3  -5   0    2.90    0.70
  -3  -5   0    1.90    1.00
   3  -5   0    1.90    0.80
   3  -5   0    2.70    0.30
  -3   5   0    2.10    1.00
  -3   5   0    2.20    0.40
   3   5   0    3.10    0.50
   3   5   0    2.30    1.00
  -3   5   0    2.40    0.30
  -3   5   0    2.60    1.20
   3   5   0    2.50    1.00
   5  -5   0   54.09    1.60
   5  -5   0   53.89    2.50
  -5  -5   0   48.90    2.80
  -5  -5   0   54.39    2.10
   5  -5   0   53.19    1.90
   5  -5   0   53.99    3.20
  -5  -5   0   48.70    1.70
   5  -5   0   52.39    1.60
  -5  -5   0   53.09    2.80
  -5  -5   0   57.09    1.80
   5   5   0   53.99    1.70
   5   5   0   53.39    2.90
  -5   5   0   55.79    1.80
   5   5   0   50.29    3.00
   5   5   0   55.19    1.80
  -5   5   0   53.69    3.30
  -5   5   0   55.79    2.60
  -5   5   0   54.19    1.70
   7  -5   0   82.09    2.40
  -7  -5   0   77.99    3.40
  -7  -5   0   76.49    2.80
  -7  -5   0   84.09    2.50
   7  -5   0   79.99    4.20
   7  -5   0   82.89    2.50
   7  -5   0   85.89    3.20
   7  -5   0   80.69    3.30
  -7  -5   0   79.99    2.60
   7  -5   0   85.59    2.60
   7  -5   0   86.59    2.60
   7   5   0   79.89    2.60
   7   5   0   82.29    3.70
  -7   5   0   79.39    3.30
   7   5   0   82.49    3.80
  -7   5   0   82.29    4.40
  -7   5   0   83.19    2.50
   7   5   0   81.19    2.60
  -7   5   0   81.79    2.50
   9  -5   0   22.80    1.30
  -9  -5   0   22.40    1.30
   9  -5   0   21.00    2.70
   9  -5   0   22.50    1.90
   9  -5   0   24.00    1.80
  -9  -5   0   24.20    1.40
  -9  -5   0   21.30    1.50
   9  -5   0   23.50    1.30
   9  -5   0   25.00    1.40
  -9  -5   0   22.20    2.20
   9  -5   0   22.90    1.20
  -9   5   0   21.40    2.40
   9   5   0   23.20    1.40
   9   5   0   25.90    2.20
  -9   5   0   21.70    1.30
  -9   5   0   23.60    2.00
  -9   5   0   24.50    1.20
   9   5   0   24.60    1.40
  -9   5   0   23.90    1.30
   9   5   0   22.00    2.50
   9   5   0   24.10    1.50
  11  -5   0    1.40    0.70
  11  -5   0    1.00    0.70
  11  -5   0    1.80    0.70
  11  -5   0    1.20    1.00
 -11  -5   0    0.50    1.30
 -11  -5   0    0.20    0.70
  11  -5   0    0.30    1.60
  11  -5   0    1.30    0.60
  11  -5   0    1.30    1.00
 -11  -5   0    0.20    0.70
 -11  -5   0    1.80    0.70
  11   5   0    1.40    0.70
  11   5   0    1.00    1.30
  11   5   0    2.20    0.80
 -11   5   0    1.90    1.10
  11   5   0    0.20    0.70
 -11   5   0    1.00    0.70
  11   5   0    2.00    1.80
 -11   5   0    1.00    0.60
 -11   5   0    0.80    1.60
 -11   5   0    1.70    0.70
  13  -5   0   36.30    3.50
  13  -5   0   34.00    1.90
 -13  -5   0   36.50    2.10
 -13  -5   0   40.70    3.20
  13  -5   0   36.20    2.60
 -13  -5   0   31.90    2.40
 -13  -5   0   35.40    2.10
  13  -5   0   39.30    1.80
  13  -5   0   36.80    2.10
  13  -5   0   38.10    2.50
  13  -5   0   38.20    1.90
 -13   5   0   38.00    1.80
  13   5   0   36.40    2.10
 -13   5   0   36.90    2.00
 -13   5   0   35.10    3.60
  13   5   0   39.80    2.10
  13   5   0   35.70    2.10
 -13   5   0   38.30    2.10
  13   5   0   41.10    3.40
 -13   5   0   39.40    2.80
 -13   5   0   41.10    1.90
 -15  -5   0   19.80    2.90
 -15  -5   0   22.30    2.00
  15  -5   0   21.40    3.20
 -15  -5   0   18.90    2.00
  15  -5   0   19.90    2.30
  15  -5   0   24.00    1.90
  15  -5   0   18.80    2.40
  15  -5   0   19.60    1.80
 -15  -5   0   19.10    1.60
  15  -5   0   22.70    1.80
  15  -5   0   20.90    1.60
  15   5   0   15.80    1.50
 -15   5   0   21.40    1.60
  15   5   0   23.70    1.90
 -15   5   0   19.80    1.80
  15   5   0   23.40    1.90
  15   5   0   21.70    3.10
 -15   5   0   23.40    2.60
 -15   5   0   22.00    2.30
 -15   5   0   22.80    1.70
 -15   5   0   19.30    3.30
 -15   5   0   20.40    1.80
  17  -5   0    1.30    1.50
  17  -5   0    1.60    1.00
  17  -5   0    2.00    2.00
 -17  -5   0    1.20    1.10
  17  -5   0    0.80    1.40
  17  -5   0    1.80    1.10
 -17  -5   0    2.70    1.00
 -17  -5   0    1.20    1.10
  17  -5   0    1.20    1.00
 -17  -5   0    4.50    2.00
  17  -5   0    1.80    1.20
 -17   5   0    0.10    1.50
  17   5   0    1.70    1.00
 -17   5   0    0.40    2.00
 -17   5   0    3.90    1.00
  17   5   0    2.10    0.90
  17   5   0    3.60    1.70
  17   5   0    1.60    0.90
 -17   5   0    1.40    1.10
 -17   5   0    1.30    1.50
 -17   5   0    3.40    1.20
 -17   5   0    0.70    1.10
  19  -5   0   17.20    3.10
 -19  -5   0   16.80    2.30
  19  -5   0   14.70    1.70
  19  -5   0   16.60    1.90
  19  -5   0   11.80    1.70
 -19  -5   0   16.40    2.60
 -19  -5   0   14.80    1.90
  19  -5   0   18.30    2.40
  19  -5   0   13.40    1.70
  19  -5   0   15.20    2.30
  19   5   0   12.40    1.90
  19   5   0   14.60    1.90
 -19   5   0   11.10    1.60
  19   5   0   15.30    2.80
  19   5   0   13.30    1.90
 -19   5   0   14.30    1.80
 -19   5   0   17.80    3.40
 -19   5   0   17.30    2.60
 -19   5   0   18.40    2.60
 -19   5   0   16.20    1.80
 -19   5   0   15.80    1.70
 -21  -5   0   18.00    2.10
  21  -5   0   22.70    2.30
 -21  -5   0   22.30    2.30
  21  -5   0   17.60    2.10
 -21  -5   0   31.00    3.50
  21  -5   0   22.80    2.40
 -21  -5   0   19.90    2.60
  21  -5   0   23.90    2.50
  21  -5   0   24.40    3.10
 -21   5   0   21.30    2.30
  21   5   0   23.70    2.60
 -21   5   0   23.40    2.30
  21   5   0   22.00    2.40
 -21   5   0   22.90    2.10
 -21   5   0   25.80    3.50
  21   5   0   20.50    3.00
  21   5   0   21.40    2.40
 -21   5   0   18.00    1.80
 -23  -5   0    3.70    1.70
  23  -5   0    1.60    1.20
 -23  -5   0    2.10    1.50
  23  -5   0    4.30    2.00
  23  -5   0    2.80    1.50
 -23  -5   0    1.20    1.70
  23  -5   0    2.40    1.60
  23   5   0    2.30    1.60
  23   5   0    2.00    1.70
  23   5   0    3.00    1.40
 -23   5   0    1.40    2.10
 -23   5   0    0.60    1.50
  23   5   0    2.60    1.90
 -23   5   0    2.10    1.40
 -23   5   0    2.40    1.40
  25  -5   0   11.20    2.00
 -25  -5   0    7.90    1.70
 -25  -5   0   11.80    2.60
  25  -5   0    9.00    2.00
  25  -5   0    6.20    1.90
 -25   5   0    7.20    1.60
 -25   5   0    8.80    1.90
 -25   5   0   14.70    3.10
  25   5   0   16.20    3.30
  25   5   0   14.10    2.30
  25   5   0    9.80    1.90
 -25   5   0    8.30    2.10
  27  -5   0   13.70    2.80
  27  -5   0   12.10    2.30
 -27  -5   0   10.20    2.90
 -27  -5   0    7.70    1.90
  27  -5   0   14.80    2.50
 -27   5   0    8.60    2.20
  27   5   0   17.20    3.50
 -27   5   0    9.90    2.30
  27   5   0   10.80    2.00
 -27   5   0   10.80    3.00
  27   5   0    8.70    2.00
   0  -6   0   61.49    3.50
   0  -6   0   60.59    2.30
   0  -6   0   56.89    2.80
   0  -6   0   60.09    1.70
   0   6   0   59.69    1.80
   0   6   0   63.09    3.70
   0   6   0   60.99    3.00
  -2  -6   0   63.79    1.70
   2  -6   0   74.19    4.00
  -2  -6   0   73.59    2.10
  -2  -6   0   74.79    3.80
   2  -6   0   72.59    3.30
  -2  -6   0   75.69    3.30
  -2  -6   0   72.69    2.60
   2  -6   0   75.89    2.50
   2  -6   0   72.69    1.90
   2   6   0   74.99    2.10
  -2   6   0   71.39    3.30
   2   6   0   75.89    4.00
  -2   6   0   75.19    4.20
  -2   6   0   74.79    2.10
   2   6   0   75.49    3.50
  -4  -6   0   23.50    1.40
  -4  -6   0   21.80    1.00
   4  -6   0   24.80    2.80
  -4  -6   0   22.20    1.90
  -4  -6   0   23.40    2.50
   4  -6   0   21.60    0.80
   4  -6   0   24.80    1.30
   4  -6   0   22.10    2.00
  -4  -6   0   25.00    1.10
   4  -6   0   24.10    0.90
   4   6   0   24.80    2.50
  -4   6   0   24.60    1.10
  -4   6   0   21.80    2.50
   4   6   0   23.40    1.10
   4   6   0   20.50    2.60
  -4   6   0   27.70    2.10
  -4   6   0   24.30    0.90
  -4   6   0   21.60    0.80
   6  -6   0    2.90    1.40
  -6  -6   0    1.40    0.90
  -6  -6   0    1.60    0.50
  -6  -6   0    2.10    1.10
  -6  -6   0    2.50    1.40
   6  -6   0    2.70    0.50
   6  -6   0    2.30    0.70
  -6  -6   0    1.70    0.50
   6  -6   0    1.40    0.40
   6  -6   0    2.20    0.90
  -6   6   0    2.30    0.50
   6   6   0    2.30    1.50
  -6   6   0    1.50    1.70
   6   6   0    2.60    0.60
  -6   6   0    2.70    0.60
   6   6   0    0.80    0.50
  -6   6   0    2.40    1.10
   6   6   0    4.30    1.60
  -8  -6   0    2.40    1.20
   8  -6   0    2.60    1.20
   8  -6   0    3.70    1.50
  -8  -6   0    3.40    0.70
   8  -6   0    3.40    0.70
   8  -6   0    4.30    0.60
  -8  -6   0    3.20    0.90
   8  -6   0    3.70    0.60
   8  -6   0    3.00    1.00
   8  -6   0    3.90    0.70
  -8  -6   0    3.60    0.70
  -8   6   0    4.00    1.90
   8   6   0    3.20    0.70
   8   6   0    4.40    1.70
   8   6   0    3.80    0.80
  -8   6   0    4.10    1.30
   8   6   0    4.50    1.80
  -8   6   0    3.20    0.60
  -8   6   0    3.10    0.60
  -8   6   0    2.60    0.60
 -10  -6   0    9.20    1.50
  10  -6   0    9.20    0.90
 -10  -6   0    8.70    1.60
  10  -6   0    7.60    0.90
  10  -6   0    8.20    1.00
  10  -6   0    8.80    1.50
 -10  -6   0    8.60    1.00
  10  -6   0    7.40    1.50
  10  -6   0    8.50    2.40
  10  -6   0    9.80    1.00
 -10  -6   0    9.90    1.10
  10   6   0    8.60    2.30
 -10   6   0    9.80    1.10
 -10   6   0    8.60    1.60
  10   6   0   10.30    2.20
  10   6   0   10.10    1.10
  10   6   0    7.80    1.00
 -10   6   0    9.70    2.40
 -10   6   0    7.90    0.90
 -10   6   0    8.50    0.80
  12  -6   0   20.70    1.60
 -12  -6   0   16.30    1.80
  12  -6   0   20.00    1.50
  12  -6   0   18.40    2.20
 -12  -6   0   18.20    1.50
  12  -6   0   19.30    1.40
  12  -6   0   18.30    1.50
  12  -6   0   19.60    2.20
 -12  -6   0   17.30    1.60
  12  -6   0   18.30    3.30
 -12  -6   0   18.10    2.60
  12   6   0   21.30    2.50
 -12   6   0   18.70    1.40
  12   6   0   21.70    1.60
 -12   6   0   18.30    1.40
 -12   6   0   20.10    2.30
 -12   6   0   21.20    3.30
 -12   6   0   20.30    1.60
  12   6   0   17.10    1.50
  14  -6   0   -1.60    0.90
  14  -6   0   -1.80    1.20
  14  -6   0   -2.20    1.30
  14  -6   0   -0.90    0.90
  14  -6   0   -0.10    2.10
 -14  -6   0   -1.10    0.90
 -14  -6   0   -0.40    1.30
 -14  -6   0   -1.30    1.60
 -14  -6   0   -0.60    0.80
  14  -6   0   -0.20    0.80
  14  -6   0    0.30    0.70
 -14   6   0   -0.50    0.70
 -14   6   0    0.00    0.80
  14   6   0    1.40    1.60
 -14   6   0   -1.00    2.10
 -14   6   0    0.20    0.80
  14   6   0   -1.60    0.80
  14   6   0   -0.70    0.90
 -14   6   0   -0.80    0.80
 -14   6   0    0.10    1.30
  16  -6   0    7.30    1.80
  16  -6   0    8.00    1.50
 -16  -6   0    7.10    1.40
  16  -6   0    7.20    1.20
  16  -6   0    5.70    1.30
 -16  -6   0    9.50    2.20
  16  -6   0    8.90    1.90
  16  -6   0    8.50    1.30
 -16  -6   0    7.90    1.40
  16  -6   0    9.00    2.80
 -16  -6   0    8.80    1.80
 -16   6   0    8.70    1.90
 -16   6   0    7.40    1.40
  16   6   0    7.80    1.50
  16   6   0    8.50    1.40
  16   6   0    8.30    2.00
 -16   6   0    8.50    2.80
 -16   6   0    8.20    1.20
  16   6   0    8.90    1.50
 -16   6   0    8.10    1.30
 -16   6   0    7.80    1.40
 -16   6   0    9.40    1.90
 -18  -6   0    0.30    1.20
  18  -6   0    0.00    2.30
  18  -6   0   -0.30    1.10
 -18  -6   0   -1.20    1.50
  18  -6   0   -0.60    1.00
  18  -6   0    1.30    1.50
  18  -6   0   -0.80    1.00
 -18  -6   0   -0.80    1.20
  18  -6   0   -2.00    1.50
 -18  -6   0    2.50    1.90
  18  -6   0   -1.00    1.10
 -18   6   0    0.00    0.90
  18   6   0    0.60    1.00
 -18   6   0    0.50    2.30
 -18   6   0    2.90    1.80
 -18   6   0    0.10    1.00
  18   6   0   -0.60    1.10
 -18   6   0   -0.50    1.10
  18   6   0   -3.20    2.10
  18   6   0   -0.10    1.30
 -18   6   0    1.80    1.70
 -18   6   0    0.20    1.10
  20  -6   0    6.50    2.00
  20  -6   0    4.40    1.40
 -20  -6   0    4.90    2.00
  20  -6   0    3.30    1.40
  20  -6   0    5.80    2.80
 -20  -6   0    3.10    1.90
 -20  -6   0    4.80    1.50
  20  -6   0    4.10    1.30
 -20  -6   0    4.40    1.50
 -20   6   0    4.50    1.30
 -20   6   0    3.30    1.40
  20   6   0    2.40    1.40
 -20   6   0    6.70    2.80
 -20   6   0    4.70    2.10
 -20   6   0    3.40    1.40
  20   6   0    6.00    1.60
  20   6   0    3.40    2.00
  20   6   0    2.30    1.20
  22  -6   0    2.80    1.50
 -22  -6   0    9.10    2.40
 -22  -6   0    3.50    1.70
 -22  -6   0    4.10    1.60
  22  -6   0    2.90    1.50
  22  -6   0    3.80    1.60
  22  -6   0    7.70    2.20
  22   6   0    3.50    2.70
  22   6   0    5.70    1.80
 -22   6   0    2.20    1.50
  22   6   0    2.80    1.50
 -22   6   0    4.40    1.50
 -22   6   0    4.70    1.40
 -22   6   0    4.80    2.30
 -24  -6   0    2.60    1.80
  24  -6   0    3.40    2.10
 -24  -6   0    0.30    1.50
  24  -6   0    1.10    1.20
 -24  -6   0    3.30    2.30
  24   6   0    2.20    1.80
  24   6   0    1.40    1.60
 -24   6   0    2.00    2.20
 -24   6   0    0.40    2.20
  24   6   0    2.70    2.80
 -24   6   0    0.10    1.40
  26  -6   0    0.20    1.70
 -26  -6   0   -1.20    2.30
 -26  -6   0   -2.70    1.80
 -26   6   0   -1.80    1.60
  26   6   0    0.30    2.90
  26   6   0    1.80    1.90
  -1  -7   0   82.59    3.80
   1  -7   0   81.59    4.60
   1  -7   0   79.49    2.80
  -1  -7   0   80.49    2.90
  -1  -7   0   78.29    4.10
   1  -7   0   77.99    3.50
  -1   7   0   79.99    4.70
   1   7   0   79.89    4.30
   1   7   0   80.49    3.90
  -1   7   0   77.69    3.60
  -3  -7   0   -0.10    0.80
   3  -7   0   -1.00    0.80
  -3  -7   0    0.00    0.90
  -3  -7   0   -0.30    1.10
   3  -7   0   -0.90    1.60
   3  -7   0   -1.10    0.60
   3   7   0   -0.20    1.10
  -3   7   0   -0.80    1.60
   3   7   0   -0.50    1.10
  -3   7   0   -0.80    1.10
   5  -7   0  100.69    4.20
   5  -7   0   97.99    5.10
  -5  -7   0  105.49    4.80
  -5  -7   0   96.79    4.20
  -5  -7   0  107.79    3.10
   5  -7   0  103.09    3.20
  -5  -7   0  100.39    3.50
  -5   7   0  103.29    4.30
   5   7   0  104.99    5.00
   5   7   0  101.19    4.60
   5   7   0   98.99    2.90
  -5   7   0   96.09    5.20
   7  -7   0   82.19    5.10
   7  -7   0   85.19    2.90
  -7  -7   0   86.09    2.80
   7  -7   0   89.29    3.90
  -7  -7   0   83.99    4.20
  -7  -7   0   84.69    3.20
   7   7   0   87.39    4.60
  -7   7   0   86.19    4.00
  -7   7   0   83.79    5.30
   7   7   0   93.59    4.60
   7   7   0   88.59    2.70
  -9  -7   0   39.80    2.90
  -9  -7   0   43.50    1.90
   9  -7   0   38.80    2.00
  -9  -7   0   36.40    2.40
   9  -7   0   39.80    3.50
   9  -7   0   39.10    2.50
   9   7   0   35.70    2.10
  -9   7   0   43.30    3.00
   9   7   0   40.30    1.90
   9   7   0   41.70    3.50
   9   7   0   39.80    3.60
  -9   7   0   39.00    3.60
  11  -7   0   13.50    2.00
  11  -7   0   13.40    2.00
 -11  -7   0   14.20    2.40
  11  -7   0   16.00    1.50
  11  -7   0   17.40    3.30
 -11  -7   0   16.50    1.70
 -11  -7   0   15.90    1.70
 -11  -7   0   17.60    1.80
 -11   7   0   16.90    3.20
  11   7   0   17.00    1.40
  11   7   0   14.20    1.50
  11   7   0   14.50    2.30
 -11   7   0   18.90    2.50
  13  -7   0   20.00    3.50
 -13  -7   0   20.60    2.00
 -13  -7   0   19.00    2.70
 -13  -7   0   21.20    2.20
  13  -7   0   21.70    2.60
 -13  -7   0   19.20    1.80
  13  -7   0   20.80    2.50
  13  -7   0   17.10    1.90
  13   7   0   21.20    1.90
 -13   7   0   25.20    2.80
 -13   7   0   24.00    4.00
  13   7   0   21.70    3.00
  13   7   0   24.10    1.80
  15  -7   0    5.30    1.80
  15  -7   0    6.00    1.80
  15  -7   0    7.70    1.30
  15  -7   0    7.60    3.00
 -15  -7   0    6.60    1.50
 -15  -7   0    7.80    1.60
 -15  -7   0    7.10    2.20
 -15  -7   0    2.00    1.20
 -15   7   0    8.00    1.30
 -15   7   0    7.30    3.20
  15   7   0    6.00    1.20
 -15   7   0    7.30    1.90
  15   7   0    7.50    2.60
  15   7   0    7.50    1.40
 -17  -7   0   -1.30    1.20
  17  -7   0   -0.90    1.60
 -17  -7   0   -1.50    1.10
  17  -7   0   -2.00    2.50
  17  -7   0   -1.00    1.50
 -17  -7   0   -0.40    1.90
  17   7   0   -1.20    1.70
 -17   7   0   -1.70    1.50
  17   7   0   -0.90    1.20
 -17   7   0   -1.70    1.80
 -17   7   0   -0.90    1.50
  17   7   0   -2.20    1.10
  19  -7   0    0.10    2.70
 -19  -7   0   -0.20    1.80
  19  -7   0   -0.90    1.50
 -19  -7   0    1.00    1.90
 -19  -7   0   -0.80    1.30
 -19   7   0    1.40    2.70
 -19   7   0   -0.70    1.70
  19   7   0   -0.50    1.20
 -19   7   0    1.00    2.00
  19   7   0   -5.10    2.20
 -21  -7   0   -0.50    1.40
 -21  -7   0    3.20    2.00
  21  -7   0    0.60    2.80
  21  -7   0    3.00    1.80
 -21  -7   0   -1.20    1.40
  21   7   0   -0.60    1.90
  21   7   0    1.30    1.40
 -21   7   0    1.30    2.70
 -23  -7   0   -0.70    1.60
 -23  -7   0   -1.10    1.50
  23   7   0    0.10    1.50
  23   7   0   -2.70    2.60
 -25  -7   0   -1.50    1.60
 -25  -7   0   -1.40    1.70
  25   7   0   -0.10    1.60
  25   7   0   -3.60    2.70
   0  -8   0   23.20    2.50
   0  -8   0   26.70    2.90
   0  -8   0   25.30    1.70
   0   8   0   28.60    2.90
   0   8   0   27.40    3.10
   2  -8   0   10.30    1.70
   2  -8   0    9.70    1.20
  -2  -8   0    7.80    1.20
   2  -8   0    9.20    2.20
  -2  -8   0    9.80    1.90
  -2  -8   0    9.20    2.40
  -2   8   0   10.10    2.00
  -2   8   0   10.90    2.40
   2   8   0   10.50    2.60
   2   8   0    9.70    2.10
   4  -8   0   -1.00    1.40
   4  -8   0   -2.30    2.00
  -4  -8   0    0.30    1.50
  -4  -8   0    1.30    1.00
   4  -8   0    1.00    0.80
  -4  -8   0    1.10    1.90
  -4   8   0   -1.50    2.10
  -4   8   0    1.60    1.50
   4   8   0    2.40    2.10
   4   8   0    0.30    1.80
   6  -8   0   50.49    3.30
  -6  -8   0   45.70    3.10
   6  -8   0   45.10    4.00
   6  -8   0   48.20    2.20
  -6  -8   0   48.10    2.60
  -6  -8   0   48.60    3.80
  -6   8   0   42.30    4.00
   6   8   0   46.80    3.30
   6   8   0   46.80    4.00
  -6   8   0   49.60    3.40
  -8  -8   0   69.69    3.90
   8  -8   0   70.79    2.70
   8  -8   0   72.49    3.80
   8  -8   0   68.09    4.80
  -8  -8   0   69.89    3.30
   8   8   0   63.59    4.00
  -8   8   0   66.39    4.90
   8   8   0   74.99    4.70
  -8   8   0   71.79    4.00
 -10  -8   0   -1.30    1.30
  10  -8   0   -1.20    1.10
  10  -8   0   -1.30    2.40
 -10  -8   0   -1.20    0.90
 -10   8   0   -0.60    2.30
 -10   8   0    0.00    1.40
  10   8   0   -2.90    2.10
 -12  -8   0   17.30    2.70
  12  -8   0   18.10    1.90
  12  -8   0   17.90    2.20
 -12  -8   0   17.90    1.90
  12  -8   0   20.10    3.40
 -12   8   0   19.60    3.80
 -12   8   0   16.80    2.40
  12   8   0   21.10    3.10
 -14  -8   0   23.80    3.40
  14  -8   0   21.80    2.90
 -14  -8   0   19.50    2.40
  14  -8   0   22.00    2.80
  14  -8   0   20.40    3.60
 -14   8   0   21.60    4.30
  14   8   0   24.70    3.40
 -14   8   0   21.40    3.00
  16  -8   0    5.40    1.90
  16  -8   0    9.20    3.50
  16  -8   0    6.40    2.10
 -16  -8   0    9.50    2.50
 -16  -8   0    8.70    2.10
 -16   8   0    7.20    3.50
  16   8   0    8.30    2.90
 -16   8   0    6.50    2.20
  18  -8   0    1.30    3.10
 -18  -8   0    1.10    2.20
  18  -8   0   -1.20    1.80
 -18  -8   0    0.80    1.90
  18  -8   0    1.10    3.10
 -18   8   0   -1.00    2.20
 -18   8   0    2.00    1.80
  18   8   0    0.00    2.60
 -18   8   0    0.50    2.90
 -20  -8   0    8.00    2.00
 -20  -8   0   10.50    2.60
  20  -8   0    7.30    3.60
  20   8   0    5.50    3.00
 -20   8   0    7.40    3.60
  22  -8   0   -1.80    3.40
 -22  -8   0   -0.60    2.20
 -22   8   0    1.60    3.10
  22   8   0   -1.60    2.10
 -24  -8   0    0.30    2.40
  24   8   0   -3.30    2.90
  -1  -9   0   32.30    3.30
  -1  -9   0   35.70    4.40
   1  -9   0   36.30    3.40
   1  -9   0   34.30    2.20
  -1  -9   0   37.50    2.30
   1  -9   0   30.00    4.50
  -1   9   0   34.40    3.60
   1   9   0   25.00    4.50
  -1   9   0   25.30    4.60
   1   9   0   26.30    3.60
   3  -9   0   83.89    4.50
   3  -9   0   73.59    5.90
  -3  -9   0   84.39    3.40
  -3  -9   0   83.49    4.60
   3  -9   0   78.09    3.10
  -3  -9   0   77.99    5.40
   3   9   0   70.39    5.10
  -3   9   0   87.29    4.70
  -3   9   0   72.19    6.10
   3   9   0   70.99    4.80
  -5  -9   0  136.89    4.80
   5  -9   0  131.39    4.40
  -5  -9   0  139.69    6.10
   5  -9   0  148.19    5.90
   5  -9   0  138.79    7.40
  -5  -9   0  143.69    6.80
   5   9   0  137.59    7.00
   5   9   0  136.19    6.30
  -5   9   0  137.99    5.90
  -5   9   0  139.89    7.80
  -7  -9   0   19.40    2.60
   7  -9   0   23.00    4.00
   7  -9   0   17.20    1.70
  -7  -9   0   23.00    1.90
   7  -9   0   22.20    2.90
  -7   9   0   23.30    3.10
   7   9   0   21.00    3.90
  -7   9   0   22.60    4.10
   7   9   0   20.00    2.70
   9  -9   0    5.60    2.00
   9  -9   0    5.10    3.10
  -9  -9   0    7.30    1.70
  -9  -9   0    5.50    2.30
   9   9   0    7.60    2.70
  -9   9   0    9.20    2.20
  -9   9   0    4.40    3.10
   9   9   0    6.10    2.80
 -11  -9   0   22.20    3.20
 -11  -9   0   19.00    2.10
  11  -9   0   21.90    3.00
  11  -9   0   22.60    3.80
 -11   9   0   23.10    3.90
  11   9   0   19.20    3.30
 -11   9   0   20.20    2.80
 -13  -9   0   -0.80    1.50
  13  -9   0   -0.60    1.30
  13  -9   0    0.90    2.30
 -13  -9   0    0.00    2.20
  13   9   0    2.60    2.70
 -13   9   0    1.70    2.50
 -13   9   0   -0.20    1.80
  15  -9   0    1.00    2.40
 -15  -9   0    2.00    2.30
 -15  -9   0    2.30    1.90
  15  -9   0    2.10    1.90
 -15   9   0    0.90    2.50
  15   9   0    0.80    2.70
 -17  -9   0    2.10    2.00
  17  -9   0    1.10    2.00
 -17  -9   0    5.80    2.60
  17  -9   0    2.90    2.80
 -17   9   0    4.60    3.60
  17   9   0    3.00    2.90
 -19  -9   0    1.30    1.60
  19  -9   0    3.20    3.70
 -19  -9   0    5.60    2.50
 -19   9   0   -0.60    3.30
  19   9   0    0.50    2.90
 -21  -9   0   -3.70    2.00
 -21  -9   0    6.60    2.60
  21  -9   0    0.10    3.50
  21   9   0   -4.00    2.80
 -21   9   0    1.10    3.50
 -23  -9   0   -2.00    1.60
  23   9   0   -5.80    2.90
   0 -10   0  199.88    6.20
   0 -10   0  192.28    7.40
   0 -10   0  224.58    9.30
   0  10   0  215.68    9.60
   0  10   0  198.08    7.80
  -2 -10   0  117.69    5.60
   2 -10   0  113.59    4.10
   2 -10   0  103.29    5.00
  -2 -10   0  118.89    6.80
   2 -10   0  107.69    6.30
  -2 -10   0  110.09    4.10
  -2  10   0  107.09    5.60
  -2  10   0  105.89    6.60
   2  10   0  104.29    6.30
   2  10   0  106.39    5.80
  -4 -10   0    2.60    2.10
   4 -10   0    6.00    1.30
   4 -10   0    7.60    2.20
   4 -10   0    7.00    3.30
  -4 -10   0    4.30    2.80
  -4 -10   0    3.90    1.40
   4  10   0    0.70    2.30
  -4  10   0    2.80    2.10
  -4  10   0    4.80    3.30
   4  10   0    2.90    2.90
   6 -10   0   85.89    4.50
   6 -10   0   94.59    6.70
  -6 -10   0   89.49    3.90
  -6 -10   0   91.79    5.20
  -6  10   0   88.59    5.10
   6  10   0   84.59    5.50
   6  10   0   87.49    6.10
  -6  10   0   94.59    6.90
  -8 -10   0   16.00    2.00
   8 -10   0   14.10    2.20
  -8 -10   0   15.90    2.90
   8 -10   0   15.50    4.10
  -8  10   0   12.10    2.60
   8  10   0   13.90    3.50
  -8  10   0   12.90    4.00
   8  10   0   11.80    2.50
  10 -10   0   22.70    4.10
 -10 -10   0   23.30    3.00
 -10 -10   0   18.80    2.30
  10 -10   0   30.10    3.30
  10  10   0   21.60    3.10
 -10  10   0   23.00    4.20
 -12 -10   0   30.00    3.00
 -12 -10   0   38.10    4.10
  12 -10   0   28.60    5.40
  12 -10   0   34.00    3.50
  12  10   0   25.90    3.60
 -12  10   0   29.30    5.50
  14 -10   0    3.20    3.90
 -14 -10   0    9.20    2.80
 -14 -10   0    0.30    1.70
  14 -10   0    2.40    2.00
  14  10   0    2.80    2.30
 -14  10   0    0.70    3.70
 -16 -10   0    4.30    2.60
  16 -10   0    0.90    2.10
  16 -10   0    3.20    4.00
 -16 -10   0    2.70    1.50
  16  10   0   -2.80    2.80
 -16  10   0   -0.70    3.60
 -18 -10   0    4.90    1.80
  18 -10   0    4.10    3.10
 -18 -10   0    7.60    2.40
  18 -10   0    2.40    3.20
  18  10   0    1.70    2.30
 -18  10   0    3.50    3.20
  20 -10   0    4.10    4.40
 -20 -10   0    4.40    2.30
 -20 -10   0   10.30    3.00
  20  10   0   -1.40    3.10
 -20  10   0    3.90    4.20
  22 -10   0   -1.10    3.00
 -22 -10   0    3.50    2.60
 -22  10   0    1.20    4.10
  22  10   0   -3.20    3.20
  -1 -11   0    1.40    2.10
  -1 -11   0    2.70    1.30
   1 -11   0    2.80    2.20
  -1 -11   0   -0.30    2.20
   1 -11   0    2.30    1.30
   1 -11   0    2.40    3.20
   1  11   0   -0.70    2.20
   1  11   0    0.60    2.30
  -1  11   0   -0.50    2.30
  -1  11   0    0.30    3.10
   3 -11   0    2.00    3.20
  -3 -11   0    6.30    1.50
  -3 -11   0    4.40    1.90
  -3 -11   0    0.00    2.90
   3 -11   0    2.50    2.10
  -3  11   0    5.00    2.80
  -3  11   0    3.00    2.40
   3  11   0    1.80    2.60
   3  11   0    2.20    3.20
  -5 -11   0   -2.30    2.80
   5 -11   0   -1.70    3.10
  -5 -11   0    2.20    1.40
  -5 -11   0    2.90    1.80
   5 -11   0    2.70    1.60
  -5  11   0    2.20    3.30
   5  11   0   -3.40    2.40
   5  11   0    0.40    2.90
  -5  11   0    1.00    2.60
  -7 -11   0   10.80    1.90
  -7 -11   0   11.30    2.80
   7 -11   0   13.40    2.30
   7 -11   0   10.50    4.00
   7  11   0    5.30    2.90
  -7  11   0   11.20    4.00
   7  11   0    8.70    3.50
  -9 -11   0    2.80    1.60
   9 -11   0    1.10    2.70
  -9 -11   0    3.00    2.40
   9 -11   0    1.50    1.60
   9  11   0   -1.20    2.70
  -9  11   0    1.70    2.70
  11 -11   0   -0.70    3.80
 -11 -11   0    0.40    1.60
 -11 -11   0    2.50    2.50
  11 -11   0    1.30    1.60
  11  11   0   -6.00    2.60
 -11  11   0   -0.60    3.50
 -13 -11   0    2.80    1.90
 -13 -11   0    4.90    2.60
  13 -11   0    0.40    2.10
  13 -11   0    1.50    4.10
 -13  11   0    2.70    4.10
  13  11   0   -2.00    3.00
 -15 -11   0    1.80    1.90
 -15 -11   0    6.90    2.90
  15 -11   0    2.40    2.30
  15 -11   0    1.40    4.20
  15  11   0   -2.40    2.10
 -15  11   0    1.70    4.10
  17 -11   0    1.10    2.50
 -17 -11   0    2.10    1.70
 -17 -11   0    8.50    3.00
  17 -11   0   -0.70    4.40
  17  11   0   -5.80    3.00
 -17  11   0   -1.00    4.20
 -19 -11   0    7.70    2.70
 -19 -11   0    1.10    1.70
  19 -11   0   -0.30    4.40
  19  11   0   -3.00    2.20
 -19  11   0    1.30    4.30
   0 -12   0    1.10    1.70
   0 -12   0   -2.80    3.10
   0  12   0   -4.20    3.00
   0  12   0   -5.10    2.40
  -2 -12   0    6.70    1.80
   2 -12   0    4.80    2.90
  -2 -12   0    6.50    2.60
  -2 -12   0    4.40    3.60
   2 -12   0    6.40    2.00
   2  12   0    1.10    3.40
   2  12   0    4.80    2.80
  -2  12   0    5.90    3.10
  -4 -12   0    6.50    1.50
  -4 -12   0    3.60    2.40
  -4 -12   0   -1.90    3.20
   4 -12   0    2.70    2.30
   4 -12   0    0.80    3.60
  -4  12   0    1.40    2.70
   4  12   0   -3.10    2.50
   4  12   0   -0.60    3.20
   6 -12   0    5.40    2.40
  -6 -12   0    5.30    2.10
   6 -12   0    6.90    4.10
  -6 -12   0    5.20    1.40
   6  12   0    0.40    2.80
   6  12   0    0.60    3.20
  -6  12   0    3.50    3.00
  -8 -12   0    8.10    1.90
  -8 -12   0    7.90    2.80
   8 -12   0    5.50    3.50
   8 -12   0    5.10    1.90
  -8  12   0    5.10    3.20
   8  12   0    4.20    2.40
 -10 -12   0    0.00    1.70
 -10 -12   0    3.40    1.70
  10 -12   0    1.30    2.30
  10 -12   0   -2.90    4.00
  10  12   0   -6.80    2.70
 -10  12   0   -1.90    3.80
 -12 -12   0    6.00    2.00
  12 -12   0    6.80    2.70
 -12 -12   0    6.10    2.40
  12 -12   0    4.20    3.60
 -12  12   0    5.70    3.60
  12  12   0   -1.10    3.30
 -14 -12   0    5.70    2.20
 -14 -12   0    5.40    2.40
  14 -12   0    3.80    3.70
  14 -12   0    4.40    2.60
  14  12   0    1.70    2.60
 -14  12   0    4.30    3.50
 -16 -12   0    4.90    2.90
 -16 -12   0    0.00    1.90
  16 -12   0    0.70    2.50
  16 -12   0   -1.90    3.30
  16  12   0   -3.60    3.30
 -16  12   0   -1.20    3.10
   1 -13   0    7.90    2.80
   1 -13   0    2.00    4.00
  -1 -13   0    6.10    2.60
  -1 -13   0    1.20    3.80
  -1  13   0   -0.60    3.90
   1  13   0    4.10    3.20
  -3 -13   0    0.80    2.40
   3 -13   0   -1.50    2.80
   3 -13   0    0.10    2.20
  -3 -13   0   -5.80    3.50
   3  13   0   -4.40    3.50
  -3  13   0   -0.20    2.80
   5 -13   0   13.50    5.00
  -5 -13   0   12.80    3.20
   5 -13   0   10.90    2.90
   5  13   0    4.30    3.90
  -5  13   0    9.10    3.80
  -7 -13   0   16.30    2.30
   7 -13   0   18.00    4.60
  -7 -13   0   14.70    3.00
   7 -13   0   18.60    3.30
   7  13   0    7.40    3.60
  -7  13   0   15.30    4.40
   9 -13   0    0.40    2.40
  -9 -13   0    1.50    1.80
   9 -13   0   -0.70    4.60
  -9 -13   0    1.50    2.80
   9  13   0   -5.80    2.80
  -9  13   0    0.00    4.20
 -11 -13   0    6.20    2.10
  11 -13   0    7.70    2.90
  11 -13   0    1.50    4.90
 -11 -13   0    8.90    3.30
  11  13   0   -2.10    3.40
 -11  13   0    4.80    3.70
 -13 -13   0   10.20    3.40
 -13 -13   0    5.70    2.20
  13 -13   0    7.30    2.80
  13 -13   0    7.10    5.50
 -13  13   0    9.20    5.20
  13  13   0   -1.30    3.50
   0 -14   0   16.60    3.50
   0 -14   0   12.00    5.20
   0  14   0   18.50    5.50
   2 -14   0    6.50    2.90
   2 -14   0    3.70    3.60
  -2 -14   0    5.80    2.90
   2  14   0   -4.70    4.20
  -2  14   0   -5.00    3.90
   4 -14   0   13.50    3.30
   4 -14   0   12.30    4.40
  -4 -14   0   12.90    3.00
  -4  14   0   11.60    4.30
   4  14   0    7.00    4.70
   6 -14   0    1.60    3.80
  -6 -14   0    4.50    3.00
   6 -14   0    3.80    2.20
  -6  14   0    1.90    3.60
   8 -14   0    2.20    5.20
  -8  14   0   -0.60    4.70
  30   0  -1    1.80    1.90
 -30   0   1   -1.50    1.90
  30   0  -1   -0.20    2.10
  30   0  -1   -0.70    2.10
 -30   0   1   -1.60    1.90
 -30   0   1   -2.90    2.00
 -28   0   1   -1.90    1.80
  28   0  -1    1.70    2.00
 -28   0   1    0.60    1.30
 -28   0   1   -1.50    1.70
  28   0  -1    1.20    1.50
  28   0  -1    1.70    2.30
  26   0  -1   -0.60    1.60
  26   0  -1   -0.10    2.10
 -26   0   1   -0.30    1.10
  26   0  -1    1.10    1.30
 -26   0   1    0.70    1.20
 -26   0   1   -0.50    1.70
  24   0  -1    0.00    1.20
 -24   0   1   -2.50    1.50
 -24   0   1   -0.70    1.00
 -24   0   1   -1.00    1.30
  24   0  -1    0.50    1.40
 -24   0   1    0.10    1.40
  24   0  -1   -1.00    1.40
  24   0  -1   -0.30    1.90
 -22   0   1    1.20    1.40
  22   0  -1   -0.20    1.00
 -22   0   1    1.40    1.40
 -22   0   1    3.20    1.20
  22   0  -1    2.50    1.50
  22   0  -1    1.40    1.00
  22   0  -1    1.00    1.40
 -22   0   1    1.30    1.00
  20   0  -1    1.90    1.30
  20   0  -1    0.80    1.30
 -20   0   1    1.50    1.10
 -20   0   1    3.70    1.40
  20   0  -1    2.20    1.10
  20   0  -1    4.00    1.40
 -20   0   1    1.50    1.00
  18   0  -1   -1.20    0.80
 -18   0   1   -2.10    1.00
  18   0  -1   -2.00    1.00
 -18   0   1   -0.70    1.40
  18   0  -1   -2.30    1.30
 -18   0   1   -1.10    0.70
 -16   0   1    1.00    1.20
  16   0  -1   -0.80    1.00
 -16   0   1   -0.50    0.90
  16   0  -1    0.00    0.60
  16   0  -1   -1.00    0.80
 -16   0   1   -1.20    0.80
 -16   0   1   -0.30    0.60
  16   0  -1    0.30    1.10
  16   0  -1   -0.70    0.90
  14   0  -1   -2.00    0.70
  14   0  -1   -0.40    0.60
  14   0  -1    0.10    1.00
  14   0  -1   -0.10    0.70
 -14   0   1   -0.30    1.00
  14   0  -1   -1.30    0.70
 -14   0   1   -0.80    0.80
 -14   0   1   -0.80    0.70
 -14   0   1   -0.10    0.60
  12   0  -1   -0.90    0.70
  12   0  -1   -0.30    0.60
 -12   0   1   -0.10    0.50
 -12   0   1   -0.30    0.70
  12   0  -1   -1.00    0.40
 -12   0   1   -1.10    0.40
  10   0  -1   -0.90    0.80
 -10   0   1   -0.10    0.70
  10   0  -1   -1.20    0.50
 -10   0   1   -0.30    0.50
 -10   0   1   -0.60    0.50
  10   0  -1   -0.90    0.50
  -8   0   1    0.70    0.60
  -8   0   1    0.40    0.50
   8   0  -1   -0.80    0.70
  -8   0   1   -0.20    0.30
   8   0  -1   -0.80    0.50
   8   0  -1   -0.40    0.30
   8   0  -1    1.10    0.60
   8   0  -1    0.00    0.40
   6   0  -1   -0.50    0.40
  -6   0   1   -1.00    0.30
  -6   0   1   -0.30    0.30
  -6   0   1    0.20    0.30
   4   0  -1   -0.50    0.50
   4   0  -1   -1.10    0.20
   4   0  -1   -1.20    0.10
  -4   0   1   -1.40    0.10
   4   0  -1   -1.20    0.20
  -4   0   1   -1.00    0.20
   4   0  -1   -1.40    0.20
   2   0  -1   -5.10    0.10
  -2   0   1   -5.40    0.10
   0   0  -1    0.10    0.10
   0   0   1    0.00    0.10
   2   0   1   -4.50    0.10
  -2   0  -1   -3.70    0.10
   2   0   1   -4.20    0.10
   2   0   1   -4.20    0.10
  -2   0  -1   -3.90    0.10
   2   0   1   -4.00    0.10
   2   0   1   -4.20    0.10
   2   0   1   -4.20    0.10
  -2   0  -1   -4.20    0.10
  -2   0  -1   -4.30    0.10
   4   0   1    0.10    0.20
   4   0   1    0.10    0.20
   4   0   1    0.40    0.30
  -4   0  -1    0.00    0.10
   4   0   1   -0.10    0.20
  -4   0  -1    0.10    0.20
   4   0   1    0.00    0.20
  -4   0  -1   -0.20    0.20
   4   0   1    0.30    0.30
   6   0   1    0.40    0.50
   6   0   1   -0.30    0.40
  -6   0  -1    0.40    0.40
   6   0   1    0.90    0.50
  -6   0  -1    1.60    0.70
  -6   0  -1    0.80    0.40
   6   0   1    0.70    0.70
  -8   0  -1    0.50    0.70
   8   0   1    0.20    0.50
   8   0   1   -0.50    0.50
  -8   0  -1    0.60    0.60
  -8   0  -1    0.30    0.50
   8   0   1    1.20    0.60
   8   0   1    1.20    0.60
   8   0   1    0.20    0.50
   8   0   1   -0.10    0.40
  -8   0  -1   -0.30    0.40
   8   0   1   -0.10    0.50
  10   0   1   -0.80    0.50
 -10   0  -1   -0.20    0.60
 -10   0  -1    0.80    0.80
  10   0   1   -1.10    0.40
  10   0   1    0.00    0.50
 -10   0  -1    0.60    0.40
  10   0   1    0.40    0.60
  10   0   1    0.80    0.60
  10   0   1   -0.70    0.40
 -12   0  -1    0.20    0.70
  12   0   1   -1.40    0.50
  12   0   1   -1.00    0.50
  12   0   1    0.10    0.60
  12   0   1    0.50    0.70
 -12   0  -1    0.10    0.50
  12   0   1    0.80    0.90
 -12   0  -1   -1.20    0.50
  12   0   1   -0.90    0.50
 -12   0  -1    0.90    1.00
  14   0   1   -1.30    0.50
 -14   0  -1   -0.10    0.60
  14   0   1   -0.50    1.00
 -14   0  -1   -0.50    1.10
  14   0   1   -1.50    0.70
  14   0   1    0.30    0.60
 -14   0  -1   -0.80    0.80
 -14   0  -1    0.10    0.60
  14   0   1   -0.40    0.70
  14   0   1   -1.10    0.50
  16   0   1   -0.70    0.90
 -16   0  -1    1.10    1.40
  16   0   1    0.00    0.90
  16   0   1   -1.20    0.90
  16   0   1    0.80    1.00
 -16   0  -1   -1.60    0.90
 -16   0  -1   -1.00    0.80
 -16   0  -1   -1.10    0.90
  16   0   1   -0.90    0.80
  18   0   1    2.30    1.00
  18   0   1   -0.50    1.20
  18   0   1   -0.10    0.80
  18   0   1    0.10    0.80
  18   0   1   -0.90    1.50
 -18   0  -1   -0.90    1.20
 -18   0  -1   -0.30    1.60
 -18   0  -1    0.80    0.80
 -18   0  -1   -0.70    1.10
 -20   0  -1    1.60    1.00
  20   0   1    0.10    1.20
  20   0   1   -0.50    1.30
 -20   0  -1    1.50    1.90
  20   0   1    1.30    1.00
  20   0   1    0.30    1.30
 -20   0  -1    0.30    1.20
 -20   0  -1    2.00    1.50
  22   0   1    0.50    1.00
 -22   0  -1    0.60    1.00
  22   0   1   -0.30    1.00
  22   0   1    1.20    1.40
 -22   0  -1    1.90    1.50
  22   0   1    1.00    1.80
 -22   0  -1   -0.40    0.90
 -24   0  -1    1.20    1.40
  24   0   1    0.50    1.50
 -24   0  -1    0.70    1.40
 -24   0  -1   -0.30    1.60
  24   0   1    1.30    1.10
  24   0   1    2.10    1.60
  24   0   1    0.40    1.40
  26   0   1    1.20    1.30
 -26   0  -1    2.90    1.40
  26   0   1    2.00    1.30
 -26   0  -1    0.40    1.20
 -26   0  -1    0.10    1.80
  26   0   1    2.40    2.20
  28   0   1    0.20    2.20
 -28   0  -1   -1.50    1.60
 -28   0  -1   -2.80    1.90
  28   0   1    0.10    1.90
 -28   0  -1    0.50    1.80
  28   0   1    0.80    1.90
 -30   0  -1    1.80    1.50
 -30   0  -1   -2.20    2.00
  30   0   1    1.50    1.60
  30   0   1    3.20    2.50
  30   0   1    1.00    1.60
 -30   0  -1    0.10    1.40
 -29  -1   1    1.90    1.80
  29  -1  -1    0.50    2.10
 -29  -1   1    0.20    1.90
  29  -1  -1    2.90    1.90
  29  -1  -1    0.20    2.00
 -29  -1   1   -0.40    2.10
  29   1  -1    1.20    2.20
  29   1  -1    1.00    1.90
 -29   1   1    0.20    1.90
 -29   1   1   -1.00    1.90
  29   1  -1    2.40    2.10
 -29   1   1   -0.70    1.90
  27  -1  -1   -0.20    1.30
 -27  -1   1    2.20    1.70
  27  -1  -1    4.80    2.40
 -27  -1   1    0.60    1.70
 -27  -1   1   -1.00    1.90
  27  -1  -1    1.80    1.90
 -27   1   1    0.10    1.70
 -27   1   1   -2.10    1.60
  27   1  -1    2.00    2.00
  27   1  -1    2.40    1.90
 -27   1   1    1.40    1.30
  27   1  -1    1.50    2.30
  25  -1  -1    7.10    2.40
  25  -1  -1    6.60    1.60
 -25  -1   1    5.70    2.00
  25  -1  -1    6.70    1.90
 -25  -1   1    4.90    1.80
 -25  -1   1    6.30    1.80
 -25  -1   1    6.30    1.80
  25  -1  -1    4.10    1.40
  25   1  -1    6.90    2.00
  25   1  -1    6.00    1.90
 -25   1   1    4.00    1.80
  25   1  -1    5.80    1.90
  25   1  -1    5.50    1.70
 -25   1   1    7.00    1.60
 -25   1   1    5.20    1.40
 -25   1   1    3.80    1.80
  23  -1  -1    0.70    1.40
 -23  -1   1   -1.20    1.50
  23  -1  -1    2.40    1.20
 -23  -1   1    2.20    1.10
 -23  -1   1    0.90    1.10
  23  -1  -1    3.50    1.60
 -23  -1   1    0.50    1.40
  23  -1  -1    2.00    1.90
  23   1  -1    0.60    1.00
  23   1  -1   -0.40    1.50
 -23   1   1    0.50    1.40
 -23   1   1    0.30    1.50
  23   1  -1    1.60    2.00
 -23   1   1   -1.50    1.40
 -23   1   1    2.50    1.50
  23   1  -1    1.10    1.20
  21  -1  -1   40.80    2.80
 -21  -1   1   27.90    2.30
 -21  -1   1   36.30    2.70
  21  -1  -1   32.50    2.40
 -21  -1   1   41.60    3.00
 -21  -1   1   38.30    2.80
  21  -1  -1   32.30    2.90
  21  -1  -1   34.40    2.70
  21   1  -1   30.50    2.80
  21   1  -1   42.10    2.80
  21   1  -1   32.90    2.40
 -21   1   1   32.50    2.60
  21   1  -1   37.60    2.90
 -21   1   1   32.90    2.40
 -21   1   1   35.80    2.70
 -21   1   1   33.80    2.70
 -19  -1   1  114.69    4.40
  19  -1  -1  108.69    4.70
 -19  -1   1  110.29    4.30
 -19  -1   1  118.59    5.10
  19  -1  -1  118.89    4.60
  19  -1  -1  114.99    4.30
 -19  -1   1  119.39    4.30
  19  -1  -1  107.59    4.10
  19   1  -1  106.79    4.30
 -19   1   1  107.49    4.10
  19   1  -1  104.69    4.10
 -19   1   1  121.19    4.20
  19   1  -1  119.79    5.10
 -19   1   1  111.89    4.30
 -19   1   1  121.89    4.60
  19   1  -1  120.29    4.40
  17  -1  -1   13.50    1.90
  17  -1  -1   13.30    1.40
 -17  -1   1   16.00    1.50
 -17  -1   1   13.70    1.40
  17  -1  -1   11.30    1.40
  17  -1  -1   16.00    1.70
 -17  -1   1   12.60    1.60
  17  -1  -1   11.50    1.50
  17  -1  -1   13.90    2.10
 -17  -1   1   15.80    2.20
 -17   1   1   16.20    1.60
 -17   1   1   13.40    1.40
 -17   1   1   12.90    1.50
 -17   1   1   14.50    2.20
 -17   1   1   12.30    1.40
  17   1  -1   13.20    2.00
  17   1  -1   12.50    1.40
  17   1  -1   12.40    1.40
  17   1  -1   11.00    1.50
 -15  -1   1   20.10    2.10
 -15  -1   1   21.80    1.60
  15  -1  -1   23.50    1.70
  15  -1  -1   22.60    1.70
  15  -1  -1   18.40    1.50
  15  -1  -1   20.10    1.80
 -15  -1   1   24.90    1.80
  15  -1  -1   21.20    1.70
 -15  -1   1   20.50    1.60
  15  -1  -1   22.00    2.20
  15   1  -1   22.90    2.00
 -15   1   1   20.80    1.60
 -15   1   1   19.90    1.70
  15   1  -1   23.10    1.60
 -15   1   1   21.70    1.80
 -15   1   1   22.90    1.90
  15   1  -1   19.80    1.90
  15   1  -1   19.10    1.70
 -15   1   1   21.30    1.60
  15   1  -1   23.20    1.60
  13  -1  -1    4.60    1.00
  13  -1  -1    2.40    0.90
  13  -1  -1    4.00    0.90
 -13  -1   1    3.40    0.70
  13  -1  -1    4.70    1.30
 -13  -1   1    4.50    1.10
  13  -1  -1    3.90    0.80
  13  -1  -1    4.20    0.80
 -13  -1   1    0.90    0.90
  13  -1  -1    3.60    0.70
 -13  -1   1    3.30    0.80
 -13   1   1    4.80    1.00
 -13   1   1    1.50    0.90
  13   1  -1    4.60    1.20
 -13   1   1    4.40    0.80
  13   1  -1    4.10    0.80
 -13   1   1    2.60    0.80
  13   1  -1    1.40    0.90
  13   1  -1    2.60    0.70
 -13   1   1    4.20    0.80
  13   1  -1    4.80    1.10
  11  -1  -1   14.60    1.30
 -11  -1   1   15.40    1.30
  11  -1  -1   12.80    1.00
  11  -1  -1   11.00    1.30
 -11  -1   1   12.60    1.30
  11  -1  -1   13.10    0.90
 -11  -1   1   13.80    1.00
  11  -1  -1   14.20    1.30
 -11  -1   1   15.50    1.50
  11  -1  -1   13.20    1.60
  11  -1  -1   12.90    1.00
 -11   1   1   14.50    1.00
  11   1  -1   13.00    1.20
 -11   1   1   14.30    1.20
 -11   1   1   14.90    1.10
  11   1  -1   12.80    1.50
  11   1  -1   12.00    1.00
  11   1  -1   15.10    1.60
 -11   1   1   14.60    1.10
  11   1  -1   13.80    1.00
  -9  -1   1   51.79    1.90
   9  -1  -1   52.99    2.00
   9  -1  -1   52.69    1.80
   9  -1  -1   53.89    2.30
   9  -1  -1   52.59    2.60
   9  -1  -1   53.29    1.90
  -9  -1   1   53.49    2.20
  -9  -1   1   55.39    1.90
   9  -1  -1   52.89    1.90
   9  -1  -1   55.49    1.90
   9   1  -1   52.99    2.00
   9   1  -1   56.99    2.00
  -9   1   1   52.39    1.90
   9   1  -1   57.79    2.40
  -9   1   1   56.49    1.90
  -9   1   1   57.09    2.00
   9   1  -1   53.99    2.20
  -9   1   1   54.49    1.80
   9   1  -1   50.59    1.90
   7  -1  -1   13.10    0.80
  -7  -1   1   12.60    1.10
   7  -1  -1   13.90    0.90
   7  -1  -1   14.40    0.80
   7  -1  -1   10.30    1.30
   7  -1  -1   11.10    0.80
   7  -1  -1   11.40    1.10
   7  -1  -1   12.10    0.80
  -7  -1   1   13.40    1.00
  -7  -1   1    9.90    0.90
   7   1  -1   11.40    0.90
   7   1  -1   11.50    0.80
  -7   1   1   13.60    0.90
  -7   1   1   12.60    0.80
   7   1  -1   13.10    1.10
   7   1  -1   11.80    0.90
  -7   1   1   11.70    0.80
   7   1  -1   13.40    1.60
  -7   1   1   13.70    0.80
   5  -1  -1   13.40    0.80
   5  -1  -1   12.90    0.70
   5  -1  -1   13.20    0.70
   5  -1  -1   12.00    1.20
   5  -1  -1   13.70    0.60
  -5  -1   1   13.10    0.70
   5  -1  -1   15.60    0.70
   5  -1  -1   10.90    0.90
   5   1  -1   15.00    1.30
   5   1  -1   13.50    0.70
   5   1  -1   15.10    1.00
   5   1  -1   12.30    0.70
  -3  -1   1  358.46    8.10
   3  -1  -1  342.97    8.70
   1  -1  -1   -8.70    0.10
  -1  -1   1   -8.60    0.10
  -1   1   1   -8.70    0.10
  -3  -1  -1 1661.63   35.80
   3  -1   1 1611.34   37.10
   3  -1   1 1456.65   35.40
   3  -1   1 1293.07   34.90
   3  -1   1 1586.14   35.50
   5  -1   1 1063.69   25.00
  -5  -1  -1 1057.29   23.50
   5  -1   1 1048.00   23.90
   5  -1   1 1031.40   24.20
   5  -1   1 1039.90   26.00
   5  -1   1 1038.80   23.50
   5  -1   1 1031.70   23.50
  -5  -1  -1 1025.70   23.50
   5  -1   1 1051.29   23.60
  -5  -1  -1 1049.89   23.60
   5   1   1 1062.49   23.50
   5   1   1  903.51   23.50
   5   1   1 1028.20   23.80
  -5   1  -1 1034.10   23.50
   5   1   1 1036.50   23.60
  -7  -1  -1 1757.42   40.60
   7  -1   1 1747.33   42.00
   7  -1   1 1714.73   44.40
   7  -1   1 1745.23   41.80
   7  -1   1 1747.93   40.60
  -7  -1  -1 1752.82   40.70
   7  -1   1 1920.81   42.90
  -7  -1  -1 1746.63   41.60
   7  -1   1 1868.91   43.20
  -7  -1  -1 1994.90   41.80
   7  -1   1 1743.23   40.60
   7   1   1 1733.43   41.20
   7   1   1 1756.92   40.70
   7   1   1 1788.72   41.10
   7   1   1 1939.21   41.40
   7   1   1 1733.83   40.60
  -7   1  -1 1970.00   42.20
  -7   1  -1 1713.53   41.80
  -7   1  -1 1737.63   40.60
  -9  -1  -1  257.87    6.50
   9  -1   1  243.88    6.70
   9  -1   1  253.47    6.80
   9  -1   1  253.97    6.50
   9  -1   1  253.37    7.00
   9  -1   1  255.47    6.50
  -9  -1  -1  257.97    6.60
  -9  -1  -1  262.67    7.10
  -9  -1  -1  259.87    6.50
   9  -1   1  249.48    6.40
   9  -1   1  261.97    6.60
   9   1   1  258.97    6.50
  -9   1  -1  254.87    6.60
  -9   1  -1  259.07    6.50
   9   1   1  253.97    6.90
   9   1   1  258.57    6.60
   9   1   1  254.97    6.50
   9   1   1  256.77    6.60
  -9   1  -1  257.07    6.80
  11  -1   1   48.80    2.20
  11  -1   1   52.19    2.20
 -11  -1  -1   50.19    2.00
  11  -1   1   54.29    2.50
  11  -1   1   49.60    2.40
 -11  -1  -1   52.69    2.70
  11  -1   1   48.20    2.10
  11  -1   1   54.59    2.10
  11  -1   1   51.89    2.10
 -11  -1  -1   51.09    2.00
 -11  -1  -1   48.70    2.20
  11   1   1   52.19    2.00
  11   1   1   48.60    2.10
  11   1   1   52.79    2.20
  11   1   1   52.09    2.40
 -11   1  -1   52.59    2.40
 -11   1  -1   50.49    1.90
  11   1   1   49.30    2.00
  11   1   1   53.79    1.90
 -11   1  -1   51.89    2.20
 -11   1  -1   53.39    2.10
  13  -1   1  108.29    3.90
  13  -1   1  108.19    3.50
  13  -1   1  110.29    3.90
  13  -1   1  109.59    3.60
  13  -1   1  109.29    3.60
  13  -1   1  110.59    3.60
 -13  -1  -1  111.39    3.50
  13  -1   1  113.79    4.00
 -13  -1  -1  102.49    3.60
 -13  -1  -1  114.79    4.20
 -13  -1  -1  107.59    3.50
 -13   1  -1  110.79    3.50
 -13   1  -1  112.09    3.70
  13   1   1  110.79    3.60
  13   1   1  111.69    3.30
  13   1   1  108.69    4.10
  13   1   1  107.99    3.70
 -13   1  -1  112.59    4.00
  13   1   1  103.99    3.50
  13   1   1  110.19    3.50
 -13   1  -1  108.99    3.50
  15  -1   1    1.20    1.00
 -15  -1  -1    0.60    0.70
 -15  -1  -1    0.30    0.80
  15  -1   1    0.30    1.10
  15  -1   1    1.30    1.30
  15  -1   1    0.10    0.80
 -15  -1  -1    1.60    1.40
  15  -1   1    0.30    0.70
 -15  -1  -1   -0.90    0.90
  15  -1   1    0.70    0.90
  15  -1   1    0.90    0.90
 -15   1  -1    0.00    0.70
 -15   1  -1    1.10    0.80
  15   1   1   -0.90    0.90
 -15   1  -1    0.90    1.20
 -15   1  -1    1.50    0.90
  15   1   1    0.20    0.90
  15   1   1    0.50    0.70
  15   1   1    1.00    1.30
 -17  -1  -1   59.59    3.90
  17  -1   1   59.19    2.80
 -17  -1  -1   58.19    3.00
 -17  -1  -1   57.29    2.60
 -17  -1  -1   55.89    2.60
  17  -1   1   59.59    3.00
  17  -1   1   61.09    3.30
  17  -1   1   55.59    2.60
  17  -1   1   54.29    2.50
 -17   1  -1   60.29    3.00
 -17   1  -1   55.59    2.50
  17   1   1   57.79    2.60
  17   1   1   59.89    3.00
  17   1   1   56.79    3.50
 -17   1  -1   59.19    3.40
  17   1   1   53.29    2.60
 -17   1  -1   63.59    2.80
  19  -1   1   26.30    2.60
  19  -1   1   28.00    2.90
 -19  -1  -1   29.80    2.20
  19  -1   1   28.10    2.40
 -19  -1  -1   26.20    2.30
 -19  -1  -1   28.90    3.30
 -19  -1  -1   22.40    2.00
  19  -1   1   29.60    2.40
  19  -1   1   23.80    2.00
 -19   1  -1   33.00    2.60
 -19   1  -1   26.40    2.40
 -19   1  -1   23.80    2.00
  19   1   1   30.30    3.20
  19   1   1   30.70    2.40
  19   1   1   24.90    2.20
 -19   1  -1   26.00    3.00
  19   1   1   26.40    2.40
  21  -1   1    0.30    1.40
  21  -1   1    2.40    1.70
 -21  -1  -1    1.10    1.30
 -21  -1  -1    0.90    1.00
 -21  -1  -1    0.20    1.90
 -21  -1  -1    0.20    1.40
  21  -1   1   -0.80    1.40
  21  -1   1    2.40    1.50
  21  -1   1    1.40    1.00
 -21   1  -1    1.40    1.30
 -21   1  -1   -0.40    1.40
 -21   1  -1    0.10    1.80
  21   1   1   -0.20    1.00
  21   1   1   -1.20    1.80
 -21   1  -1    0.30    1.30
  21   1   1    2.00    1.40
  21   1   1    0.60    1.10
  23  -1   1    7.60    2.10
  23  -1   1    5.60    1.40
  23  -1   1    3.70    1.60
  23  -1   1    5.30    1.40
 -23  -1  -1    6.10    1.40
 -23  -1  -1    5.80    1.80
 -23  -1  -1    4.60    1.30
  23   1   1    6.90    1.50
  23   1   1    7.30    1.80
 -23   1  -1    3.70    1.70
  23   1   1    4.10    1.70
 -23   1  -1    8.20    1.70
  23   1   1    5.30    1.40
 -23   1  -1    5.10    1.30
  25  -1   1    3.10    2.10
 -25  -1  -1    2.10    1.80
  25  -1   1    2.40    1.70
  25  -1   1    5.50    1.80
  25  -1   1    6.10    1.90
 -25  -1  -1    2.80    1.30
 -25  -1  -1    6.50    1.80
  25   1   1    4.00    1.40
  25   1   1    5.30    1.90
 -25   1  -1    6.80    1.80
  25   1   1    4.60    1.80
 -25   1  -1    5.70    1.90
  25   1   1    4.90    2.30
 -25   1  -1    5.70    1.70
 -25   1  -1    3.30    1.90
 -27  -1  -1    1.80    1.70
  27  -1   1    1.50    1.40
 -27  -1  -1   -0.10    1.90
  27  -1   1    2.70    1.80
  27  -1   1    0.10    1.80
 -27   1  -1    0.20    1.30
  27   1   1    2.80    1.90
 -27   1  -1   -1.10    1.90
  27   1   1    2.60    2.00
  27   1   1    1.50    2.30
 -27   1  -1    0.20    1.30
 -29  -1  -1    3.80    1.90
  29  -1   1    4.70    2.10
 -29  -1  -1    3.40    1.50
 -29  -1  -1    0.30    2.20
  29  -1   1    4.10    2.40
  29  -1   1    3.50    2.20
  29   1   1    3.50    1.70
  29   1   1    6.20    2.20
 -29   1  -1   -0.10    1.90
 -29   1  -1    2.80    2.00
 -29   1  -1    2.00    2.20
  29   1   1    3.30    2.10
  30  -2  -1    0.00    2.10
 -30  -2   1    0.50    1.50
  30  -2  -1    4.80    2.50
 -30  -2   1   -0.80    1.60
 -30  -2   1    1.40    1.90
  30  -2  -1    0.70    2.10
 -30   2   1   -0.30    1.90
  30   2  -1   -0.90    2.10
 -30   2   1   -0.70    2.00
  30   2  -1    5.20    2.90
  30   2  -1    2.90    2.20
  28  -2  -1    1.30    2.00
 -28  -2   1    1.90    1.80
  28  -2  -1    1.50    2.00
 -28  -2   1   -1.80    1.50
 -28  -2   1   -1.80    1.20
  28  -2  -1    3.70    2.40
  28   2  -1    1.60    1.90
  28   2  -1    2.10    1.60
 -28   2   1   -0.50    1.80
 -28   2   1   -0.70    1.80
 -28   2   1   -1.00    1.80
  28   2  -1    2.00    2.10
 -26  -2   1    0.30    1.50
  26  -2  -1    2.80    1.50
 -26  -2   1    0.30    1.10
  26  -2  -1    3.80    2.20
 -26  -2   1    1.20    1.20
  26  -2  -1    2.90    1.80
 -26   2   1    0.50    1.70
 -26   2   1   -0.80    1.20
  26   2  -1    0.70    1.30
  26   2  -1    0.20    1.30
  26   2  -1    2.50    2.30
 -26   2   1   -0.30    1.60
 -24  -2   1    0.00    1.40
 -24  -2   1   -1.20    1.70
 -24  -2   1    1.00    1.10
  24  -2  -1   -0.60    1.10
 -24  -2   1   -0.60    1.10
  24  -2  -1    2.40    2.00
  24  -2  -1   -0.80    1.50
  24  -2  -1   -2.40    1.40
 -24   2   1    0.20    1.10
 -24   2   1    0.30    1.50
  24   2  -1    0.70    1.20
  24   2  -1   -0.10    1.20
 -24   2   1   -1.10    1.50
  24   2  -1    0.60    2.00
  24   2  -1    0.20    1.50
 -22  -2   1    4.90    1.30
 -22  -2   1    6.00    1.80
  22  -2  -1    3.60    1.60
  22  -2  -1    3.50    1.60
  22  -2  -1    4.20    1.30
 -22  -2   1    7.00    1.60
  22  -2  -1    5.90    1.60
  22   2  -1    5.10    1.70
  22   2  -1    6.20    1.70
 -22   2   1    3.30    1.40
  22   2  -1    4.80    1.80
 -22   2   1    3.80    1.60
 -22   2   1    4.00    1.50
 -22   2   1    4.90    1.30
  22   2  -1    4.40    1.30
 -20  -2   1   14.20    1.80
  20  -2  -1   14.30    1.80
 -20  -2   1   12.80    1.70
 -20  -2   1   11.50    1.80
  20  -2  -1   14.50    1.70
  20  -2  -1   14.30    1.90
  20  -2  -1   16.80    2.50
  20  -2  -1   14.20    1.80
  20   2  -1   18.60    2.00
 -20   2   1   15.10    1.80
  20   2  -1   14.00    2.40
  20   2  -1   15.70    1.90
 -20   2   1   21.00    2.40
 -20   2   1   17.10    1.80
 -20   2   1   13.60    1.60
  20   2  -1   13.70    1.90
  18  -2  -1   -0.10    1.10
  18  -2  -1    1.80    1.50
  18  -2  -1   -0.30    0.90
 -18  -2   1    0.60    1.20
  18  -2  -1   -0.90    1.10
 -18  -2   1    1.00    0.90
  18  -2  -1    1.90    1.20
  18  -2  -1    1.20    1.80
 -18  -2   1    2.30    1.50
  18  -2  -1   -1.30    1.10
 -18  -2   1    0.50    1.30
  18   2  -1    0.40    0.90
 -18   2   1    1.40    1.10
 -18   2   1    0.50    1.10
  18   2  -1   -2.00    1.10
  18   2  -1    1.20    1.60
 -18   2   1    2.50    1.10
 -18   2   1    1.50    1.50
  18   2  -1   -0.40    1.20
 -18   2   1    1.20    0.90
  16  -2  -1    1.20    0.90
  16  -2  -1    1.70    1.40
  16  -2  -1    0.50    0.70
 -16  -2   1    1.60    1.00
  16  -2  -1    1.30    0.90
  16  -2  -1    0.00    0.90
  16  -2  -1    1.80    0.80
 -16  -2   1    2.60    1.20
  16  -2  -1    0.90    1.10
 -16  -2   1    1.90    1.30
 -16  -2   1    1.60    1.00
 -16   2   1    1.00    0.80
 -16   2   1    1.70    0.90
  16   2  -1    0.90    0.80
  16   2  -1    1.80    1.00
  16   2  -1    1.90    1.00
  16   2  -1    1.50    1.10
 -16   2   1    0.40    0.70
 -16   2   1    1.90    1.10
 -16   2   1    1.90    0.80
  14  -2  -1   34.60    1.90
 -14  -2   1   31.40    1.70
  14  -2  -1   37.20    2.40
  14  -2  -1   31.90    2.00
  14  -2  -1   32.60    1.80
  14  -2  -1   28.80    1.50
  14  -2  -1   33.50    2.00
 -14  -2   1   33.30    2.40
 -14  -2   1   33.00    2.00
  14  -2  -1   28.10    2.60
 -14  -2   1   33.90    2.00
 -14   2   1   31.20    1.90
  14   2  -1   31.90    1.70
 -14   2   1   30.90    1.70
 -14   2   1   31.60    1.70
 -14   2   1   32.10    2.00
  14   2  -1   31.20    2.20
  14   2  -1   31.60    1.90
 -14   2   1   27.80    1.50
  14   2  -1   31.20    1.70
  14   2  -1   30.00    2.20
 -12  -2   1   64.89    2.50
  12  -2  -1   58.09    2.60
  12  -2  -1   61.19    2.50
 -12  -2   1   62.89    2.30
 -12  -2   1   64.49    2.90
 -12  -2   1   62.29    2.40
  12  -2  -1   62.69    2.20
  12  -2  -1   61.09    2.30
  12  -2  -1   61.09    2.50
  12  -2  -1   59.99    3.30
  12  -2  -1   59.89    2.30
  12   2  -1   62.69    2.50
  12   2  -1   61.79    2.30
  12   2  -1   61.79    2.80
  12   2  -1   63.89    3.00
 -12   2   1   58.89    2.20
 -12   2   1   63.29    2.30
 -12   2   1   60.39    2.50
  12   2  -1   61.09    2.30
 -12   2   1   61.69    2.30
 -12   2   1   63.99    2.50
  10  -2  -1  523.95   12.60
  10  -2  -1  523.25   12.80
  10  -2  -1  524.25   12.70
 -10  -2   1  524.85   12.80
 -10  -2   1  541.55   13.20
 -10  -2   1  535.55   12.80
  10  -2  -1  539.35   13.30
  10  -2  -1  521.55   14.00
 -10  -2   1  522.65   12.70
  10  -2  -1  535.55   12.80
  10  -2  -1  521.25   12.50
  10   2  -1  549.95   13.40
 -10   2   1  525.65   12.60
 -10   2   1  539.85   12.90
  10   2  -1  528.25   12.80
 -10   2   1  525.25   12.50
  10   2  -1  528.55   12.70
  10   2  -1  539.55   12.80
 -10   2   1  532.45   12.80
  10   2  -1  538.15   13.30
   8  -2  -1    8.80    0.80
   8  -2  -1    9.20    0.90
   8  -2  -1    8.20    0.90
   8  -2  -1    8.90    0.70
  -8  -2   1   11.80    0.90
   8  -2  -1    8.30    1.20
   8  -2  -1    8.10    0.90
   8  -2  -1    7.30    0.80
  -8   2   1   10.00    0.90
  -8   2   1    7.90    0.70
   8   2  -1   10.60    0.80
  -8   2   1    8.70    0.70
   8   2  -1    9.60    1.40
   8   2  -1   11.20    0.80
   8   2  -1   12.40    0.80
   8   2  -1   12.60    1.80
   6  -2  -1  106.59    3.90
   6  -2  -1  107.59    2.90
   6  -2  -1  109.39    2.80
   6  -2  -1  108.29    3.00
  -6  -2   1  106.19    3.10
  -6  -2   1  108.19    3.00
  -6  -2   1   99.89    3.30
   6  -2  -1  107.79    2.90
   6  -2  -1  108.49    3.00
   6  -2  -1  108.79    3.40
  -6   2   1  109.39    3.00
  -6   2   1  108.89    2.80
   6   2  -1  109.89    3.00
  -6   2   1  108.39    2.80
   6   2  -1  109.79    3.00
   6   2  -1  109.99    3.40
  -6   2   1  113.59    3.40
   6   2  -1  106.99    3.70
   6   2  -1  106.89    2.90
   4  -2  -1 1937.91   46.40
   4  -2  -1 1971.80   45.70
   4  -2  -1 1958.30   46.30
   4  -2  -1 1877.01   45.80
  -4  -2   1 2128.89   45.40
   4  -2  -1 1919.71   49.60
  -4  -2   1 1931.41   45.20
   4  -2  -1 2115.19   45.10
   4  -2  -1 1952.30   45.40
   4   2  -1 1898.41   46.00
   2  -2  -1   52.19    1.90
   2  -2  -1   57.19    1.80
  -2  -2   1   58.29    1.60
   2  -2  -1   56.99    1.50
  -2  -2   1   58.69    1.50
   2   2  -1   59.09    2.20
   0  -2  -1  766.42   16.00
   0  -2   1  761.72   15.70
   0  -2  -1  789.72   15.70
   0  -2  -1  595.04   16.00
   0  -2   1  596.04   15.70
   0   2  -1  638.04   16.40
   2  -2   1 1104.09   27.90
  -2  -2  -1 1137.29   26.40
  -2  -2  -1 1171.58   27.10
  -2  -2  -1 1157.68   27.10
   2  -2   1 1143.99   26.40
   2  -2   1 1224.78   27.20
  -2  -2  -1 1242.18   27.40
   2  -2   1 1142.99   27.00
   2  -2   1 1182.58   26.40
  -4  -2  -1  418.96   11.80
  -4  -2  -1  501.75   11.40
  -4  -2  -1  500.05   11.40
  -4  -2  -1  504.15   11.30
   4  -2   1  509.55   11.30
   4  -2   1  516.35   11.50
   4  -2   1  506.95   11.70
   4  -2   1  495.45   12.20
   4  -2   1  506.55   11.30
   4  -2   1  494.25   11.30
   4  -2   1  502.65   11.40
  -4   2  -1  416.96   12.10
  -4   2  -1  497.95   11.30
   4   2   1  498.55   11.40
   4   2   1  488.45   11.60
   4   2   1  489.85   11.90
   6  -2   1   24.50    1.30
  -6  -2  -1   25.90    1.10
   6  -2   1   25.40    1.10
  -6  -2  -1   26.50    1.20
  -6  -2  -1   24.80    1.80
  -6  -2  -1   27.80    1.30
   6  -2   1   25.70    1.10
   6  -2   1   24.40    1.70
   6  -2   1   26.30    1.10
   6  -2   1   26.20    1.10
   6  -2   1   26.70    1.30
   6   2   1   27.30    1.20
  -6   2  -1   25.70    1.10
  -6   2  -1   23.80    1.70
   6   2   1   26.30    1.10
   6   2   1   25.70    1.10
   6   2   1   26.10    1.80
   8  -2   1  277.97    7.40
   8  -2   1  283.97    8.00
  -8  -2  -1  291.87    7.30
   8  -2   1  285.17    7.10
  -8  -2  -1  295.67    7.90
   8  -2   1  287.07    7.20
   8  -2   1  287.67    7.10
  -8  -2  -1  287.47    7.10
  -8  -2  -1  290.57    7.30
   8  -2   1  292.57    7.40
   8  -2   1  288.77    7.10
  -8   2  -1  291.47    7.20
   8   2   1  288.87    7.20
   8   2   1  294.97    7.30
  -8   2  -1  289.97    7.10
  -8   2  -1  294.57    7.50
   8   2   1  295.67    7.20
   8   2   1  283.57    7.70
  -8   2  -1  285.97    8.10
  10  -2   1  474.85   11.40
  10  -2   1  466.65   11.50
 -10  -2  -1  466.35   11.60
  10  -2   1  465.25   11.80
  10  -2   1  471.85   11.40
  10  -2   1  470.75   12.40
  10  -2   1  482.35   11.60
 -10  -2  -1  475.15   11.50
 -10  -2  -1  489.85   11.60
  10  -2   1  474.75   11.80
 -10  -2  -1  481.45   12.30
 -10   2  -1  467.95   11.40
  10   2   1  478.15   11.50
 -10   2  -1  487.65   11.60
  10   2   1  478.55   11.50
  10   2   1  475.45   11.60
  10   2   1  476.15   12.10
 -10   2  -1  485.25   11.90
 -10   2  -1  463.65   12.50
  12  -2   1  123.29    4.10
  12  -2   1  126.99    3.90
 -12  -2  -1  129.59    4.00
 -12  -2  -1  122.09    3.80
  12  -2   1  120.59    4.10
  12  -2   1  127.49    3.80
  12  -2   1  126.29    4.60
 -12  -2  -1  129.49    4.70
  12  -2   1  121.59    3.70
  12  -2   1  121.89    3.80
 -12  -2  -1  122.89    3.90
 -12   2  -1  127.69    3.80
 -12   2  -1  118.79    4.60
  12   2   1  134.59    4.00
  12   2   1  129.09    4.50
 -12   2  -1  126.39    4.20
 -12   2  -1  126.59    3.90
  12   2   1  131.49    3.90
 -12   2  -1  128.89    3.80
  12   2   1  123.89    3.90
  14  -2   1    3.90    1.20
 -14  -2  -1    4.60    1.50
  14  -2   1    5.90    1.10
  14  -2   1    5.00    1.00
  14  -2   1    4.60    1.00
 -14  -2  -1    4.50    0.80
 -14  -2  -1    4.60    0.90
 -14  -2  -1    4.20    0.90
  14  -2   1    3.40    0.90
  14  -2   1    4.30    1.40
  14  -2   1    5.30    1.30
 -14   2  -1    4.60    1.00
  14   2   1    5.10    1.50
 -14   2  -1    4.60    1.00
 -14   2  -1    4.30    1.30
  14   2   1    3.40    1.00
 -14   2  -1    4.70    1.40
  14   2   1    3.90    0.80
  14   2   1    4.30    0.80
 -14   2  -1    3.70    0.90
  16  -2   1   34.90    2.60
  16  -2   1   34.80    2.10
  16  -2   1   34.00    2.70
  16  -2   1   33.40    2.30
  16  -2   1   35.20    2.10
  16  -2   1   31.10    2.20
 -16  -2  -1   33.70    1.90
  16  -2   1   34.40    2.10
 -16  -2  -1   38.30    3.10
 -16  -2  -1   31.40    2.30
 -16  -2  -1   32.20    2.20
 -16   2  -1   33.30    2.00
  16   2   1   32.50    2.50
  16   2   1   34.70    1.90
 -16   2  -1   32.40    2.80
  16   2   1   33.80    2.20
 -16   2  -1   31.70    1.80
 -16   2  -1   32.20    2.30
  16   2   1   36.20    2.30
 -16   2  -1   36.50    2.60
 -18  -2  -1    4.50    1.10
 -18  -2  -1    3.80    1.10
  18  -2   1    3.20    1.30
  18  -2   1    3.30    1.60
  18  -2   1    2.70    1.30
 -18  -2  -1    3.40    2.00
  18  -2   1    3.30    1.70
 -18  -2  -1    2.80    1.30
  18  -2   1    5.00    1.40
  18   2   1    2.40    1.90
 -18   2  -1    2.10    1.60
  18   2   1    3.60    1.30
 -18   2  -1    3.80    1.30
  18   2   1    1.60    1.30
  18   2   1    3.30    1.40
 -18   2  -1    3.90    1.20
 -18   2  -1    4.20    1.30
 -20  -2  -1    3.70    1.40
  20  -2   1    4.70    1.40
  20  -2   1    5.90    1.60
  20  -2   1    3.20    1.10
 -20  -2  -1    3.80    2.10
  20  -2   1    4.90    1.20
  20  -2   1    3.60    1.20
 -20  -2  -1    2.50    1.20
 -20  -2  -1    4.90    1.50
 -20   2  -1    5.10    1.50
  20   2   1    5.60    1.60
  20   2   1    3.50    1.20
  20   2   1    3.40    2.00
 -20   2  -1    3.10    1.90
 -20   2  -1    5.10    1.50
 -20   2  -1    3.00    1.10
  20   2   1    4.30    1.50
  22  -2   1    1.90    1.10
 -22  -2  -1    1.80    1.10
  22  -2   1   -0.40    1.10
 -22  -2  -1    3.00    1.70
  22  -2   1    4.70    1.90
  22  -2   1    2.40    1.20
 -22  -2  -1    2.60    2.10
 -22  -2  -1    2.40    1.40
  22  -2   1    2.30    1.50
  22   2   1    2.80    1.50
  22   2   1    1.90    1.20
 -22   2  -1    1.00    1.10
  22   2   1    0.10    1.10
 -22   2  -1    1.50    1.20
  22   2   1   -0.30    2.00
 -22   2  -1    1.10    1.40
 -22   2  -1    1.50    1.40
 -24  -2  -1    5.80    1.40
  24  -2   1    6.30    1.80
  24  -2   1    4.90    1.70
  24  -2   1    3.40    1.40
 -24  -2  -1    2.70    1.80
  24  -2   1    6.10    1.80
  24  -2   1    7.70    2.20
 -24  -2  -1    5.10    1.40
 -24   2  -1    6.40    1.70
 -24   2  -1    6.70    1.70
  24   2   1    4.60    1.80
  24   2   1    7.80    2.50
  24   2   1    4.80    1.40
  24   2   1    5.30    1.50
 -24   2  -1    5.40    1.80
 -24   2  -1    4.40    1.50
 -26  -2  -1   -0.10    1.80
 -26  -2  -1    0.70    1.20
  26  -2   1    1.90    1.70
  26  -2   1    2.40    1.40
  26  -2   1    4.40    2.20
  26   2   1    2.00    1.80
 -26   2  -1    1.90    1.30
  26   2   1    3.40    1.90
  26   2   1    3.80    1.90
 -26   2  -1   -0.20    1.70
 -26   2  -1    0.10    1.70
  28  -2   1    3.50    1.60
  28  -2   1    6.10    2.40
 -28  -2  -1    1.80    1.90
 -28  -2  -1    3.20    1.80
  28  -2   1    5.20    2.20
 -28   2  -1    3.60    1.60
 -28   2  -1    2.50    1.90
 -28   2  -1    1.50    2.00
  28   2   1    4.10    2.10
  28   2   1    5.40    2.20
  28   2   1    4.80    2.20
 -30  -2  -1    5.00    2.60
 -30  -2  -1    6.30    2.20
  30  -2   1    3.60    1.70
  30  -2   1   10.20    2.80
 -30  -2  -1    5.60    2.20
  30   2   1    4.90    2.40
  30   2   1    9.70    3.00
  30   2   1    6.20    2.40
 -30   2  -1    2.30    1.60
 -30   2  -1    1.30    2.10
 -30   2  -1    3.90    2.20
  29  -3  -1    2.90    2.10
  29  -3  -1    7.40    2.40
 -29  -3   1    2.70    2.10
  29  -3  -1   10.90    2.90
 -29  -3   1    2.60    2.40
 -29  -3   1    4.70    2.10
  29   3  -1    0.50    2.20
 -29   3   1    4.10    2.10
  29   3  -1    5.20    2.30
  29   3  -1    6.60    2.90
 -29   3   1    0.80    2.10
 -27  -3   1    3.20    1.70
 -27  -3   1    1.40    1.80
 -27  -3   1    0.50    2.10
  27  -3  -1    5.70    2.40
  27  -3  -1    1.00    1.90
  27  -3  -1   -0.40    1.80
 -27   3   1    0.60    1.80
  27   3  -1    0.10    1.50
  27   3  -1    2.50    2.00
 -27   3   1   -0.70    1.90
  27   3  -1    1.70    1.90
 -25  -3   1    5.10    1.40
  25  -3  -1    8.60    2.40
  25  -3  -1    6.20    2.00
  25  -3  -1    5.20    1.90
 -25  -3   1    5.70    1.50
 -25  -3   1    5.70    1.80
 -25  -3   1    4.90    1.50
  25  -3  -1    3.20    1.70
  25   3  -1    4.50    1.70
  25   3  -1    9.60    2.70
 -25   3   1    4.20    1.80
 -25   3   1    3.70    1.70
 -25   3   1    7.20    2.10
  25   3  -1    8.00    1.70
 -25   3   1    7.80    1.90
  25   3  -1    6.50    1.60
 -23  -3   1    5.80    1.40
  23  -3  -1    5.20    1.70
 -23  -3   1    4.40    1.60
  23  -3  -1    9.10    2.30
  23  -3  -1    6.80    1.50
  23  -3  -1    4.20    1.30
 -23  -3   1    6.40    2.00
  23  -3  -1    5.20    1.40
  23   3  -1    6.10    2.40
  23   3  -1    5.50    1.50
 -23   3   1    4.70    1.60
 -23   3   1    4.90    1.30
 -23   3   1    3.70    1.30
  23   3  -1    0.80    1.50
  23   3  -1    3.00    1.80
 -23   3   1    5.80    1.40
 -21  -3   1    1.30    1.40
  21  -3  -1    4.10    1.90
 -21  -3   1    3.00    1.40
  21  -3  -1    4.40    1.50
  21  -3  -1    4.50    1.50
 -21  -3   1    3.40    1.30
  21  -3  -1    3.50    1.50
  21  -3  -1    2.10    1.40
 -21   3   1    1.10    1.30
 -21   3   1    0.00    1.40
 -21   3   1    1.00    1.40
 -21   3   1    2.70    1.30
  21   3  -1    3.30    2.10
  21   3  -1   -0.20    1.20
  21   3  -1   -0.40    1.40
  21   3  -1    1.70    1.40
  19  -3  -1   26.10    2.10
  19  -3  -1   21.90    3.10
  19  -3  -1   23.90    2.00
 -19  -3   1   21.80    1.90
 -19  -3   1   21.30    2.00
  19  -3  -1   21.90    2.00
 -19  -3   1   23.10    2.90
 -19  -3   1   24.90    2.60
  19  -3  -1   23.30    2.20
  19  -3  -1   22.90    2.90
 -19   3   1   22.60    2.00
 -19   3   1   23.30    2.10
  19   3  -1   24.80    3.10
  19   3  -1   20.90    1.90
 -19   3   1   22.10    1.90
 -19   3   1   24.60    2.00
  19   3  -1   21.50    2.00
  19   3  -1   21.10    1.90
 -17  -3   1    9.90    1.90
  17  -3  -1   10.90    1.50
  17  -3  -1    6.50    1.40
  17  -3  -1    9.90    1.80
  17  -3  -1    9.40    1.90
 -17  -3   1    6.00    1.40
  17  -3  -1    8.80    2.30
  17  -3  -1    7.90    1.30
  17  -3  -1   11.70    1.40
 -17  -3   1    8.00    1.50
 -17  -3   1    6.80    1.60
 -17   3   1   10.00    1.30
  17   3  -1    9.60    2.00
 -17   3   1    9.30    1.40
  17   3  -1   10.30    1.30
 -17   3   1    9.70    1.30
 -17   3   1   10.90    1.80
  17   3  -1    9.60    1.50
 -17   3   1    5.30    1.30
  17   3  -1    7.60    1.50
  15  -3  -1   16.20    1.70
 -15  -3   1   16.60    1.60
  15  -3  -1   16.00    2.00
  15  -3  -1   18.70    1.70
  15  -3  -1   16.00    1.90
  15  -3  -1   14.90    2.50
 -15  -3   1   17.10    1.70
 -15  -3   1   16.60    1.70
  15  -3  -1   17.60    1.50
  15  -3  -1   16.40    1.50
 -15  -3   1   19.10    2.20
  15   3  -1   17.30    1.70
  15   3  -1   17.40    1.70
 -15   3   1   18.10    1.60
 -15   3   1   18.50    1.80
 -15   3   1   14.40    1.20
  15   3  -1   18.20    2.50
 -15   3   1   18.10    1.40
  15   3  -1   16.30    1.60
 -15   3   1   14.30    1.60
 -13  -3   1   29.60    1.70
  13  -3  -1   29.60    2.80
  13  -3  -1   30.30    1.70
  13  -3  -1   28.20    1.60
  13  -3  -1   28.60    1.60
 -13  -3   1   31.40    2.30
 -13  -3   1   32.70    1.80
  13  -3  -1   31.00    2.20
 -13  -3   1   34.10    2.10
  13  -3  -1   33.10    2.10
  13  -3  -1   30.90    1.50
  13   3  -1   29.80    2.20
  13   3  -1   31.00    2.40
 -13   3   1   29.50    1.50
 -13   3   1   31.70    1.70
  13   3  -1   31.60    1.80
  13   3  -1   29.20    1.80
 -13   3   1   30.60    2.00
 -13   3   1   29.20    1.60
 -13   3   1   31.00    1.70
  13   3  -1   29.70    1.70
  11  -3  -1    3.10    0.60
  11  -3  -1    3.30    0.70
 -11  -3   1    2.50    0.70
 -11  -3   1    3.90    1.10
  11  -3  -1    3.00    0.80
  11  -3  -1    3.40    0.60
 -11  -3   1    2.20    0.90
 -11  -3   1    3.40    0.70
  11  -3  -1    2.70    0.80
  11  -3  -1    3.60    1.50
  11  -3  -1    4.00    0.90
 -11   3   1    3.40    0.70
  11   3  -1    2.80    0.70
 -11   3   1    3.10    0.80
 -11   3   1    3.40    0.80
  11   3  -1    3.10    0.80
  11   3  -1    3.20    1.60
 -11   3   1    3.20    0.70
 -11   3   1    3.10    1.00
  11   3  -1    2.70    1.30
 -11   3   1    3.90    0.70
  11   3  -1    3.20    0.80
  -9  -3   1  359.36    8.80
   9  -3  -1  345.97    8.70
  -9  -3   1  351.66    9.20
  -9  -3   1  349.96    8.60
   9  -3  -1  342.17    8.60
   9  -3  -1  345.27    8.60
   9  -3  -1  346.57    8.40
   9  -3  -1  347.67    8.30
  -9  -3   1  346.37    8.60
   9  -3  -1  338.87    9.10
   9  -3  -1  335.97   10.00
   9   3  -1  337.77    8.50
   9   3  -1  355.26    8.60
   9   3  -1  334.57    9.40
   9   3  -1  359.36    8.70
  -9   3   1  343.47    8.30
   9   3  -1  339.77    9.20
  -9   3   1  348.77    9.20
  -9   3   1  335.67    8.40
  -9   3   1  351.06    8.60
  -7  -3   1  419.36   10.40
   7  -3  -1  427.56   10.20
  -7  -3   1  434.56   10.20
   7  -3  -1  427.26   10.20
   7  -3  -1  419.96   10.00
  -7  -3   1  431.26   10.80
   7  -3  -1  425.56   10.00
   7  -3  -1  421.86   10.80
   7  -3  -1  422.86   10.40
  -7  -3   1  425.36   10.20
   7  -3  -1  407.36   11.60
  -7   3   1  441.76   10.90
   7   3  -1  425.16   11.10
   7   3  -1  432.46   10.20
  -7   3   1  428.96   10.00
  -7   3   1  431.96   10.20
   7   3  -1  433.26   10.20
   7   3  -1  435.26   10.20
   7   3  -1  415.06   10.80
   5  -3  -1  113.19    3.00
   5  -3  -1  112.09    3.60
   5  -3  -1  117.19    3.00
   5  -3  -1  113.19    4.20
   5  -3  -1  114.99    3.10
  -5  -3   1  110.99    3.60
   5  -3  -1  114.59    3.40
   5  -3  -1  113.69    2.90
  -5  -3   1  114.99    3.10
  -5  -3   1  112.59    3.30
   5   3  -1  114.49    3.70
   5   3  -1  117.79    3.10
  -5   3   1  117.19    2.90
   5   3  -1  118.09    4.00
  -5   3   1  119.59    3.70
  -5   3   1  118.09    3.10
   5   3  -1  116.99    3.00
  -3  -3   1   13.40    0.70
   3  -3  -1   10.80    1.00
  -3  -3   1   13.10    0.60
   3  -3  -1   10.80    1.10
  -3  -3   1   10.70    1.00
   3  -3  -1   12.70    0.60
  -3  -3   1   11.70    0.90
   3  -3  -1   12.00    1.30
  -3   3   1   11.50    0.70
  -3   3   1   14.80    1.20
   3   3  -1   12.40    0.60
   3   3  -1   13.80    1.50
   3   3  -1   13.50    1.30
   3   3  -1   10.70    0.50
  -1  -3   1  832.82   18.60
  -1  -3   1  862.01   18.40
  -1  -3   1  806.52   19.00
   1  -3  -1  863.61   18.50
   1  -3  -1  764.92   19.50
   1  -3  -1  851.81   19.00
   1  -3  -1  840.32   18.40
  -1  -3   1  693.03   19.20
   1   3  -1  826.22   19.60
  -1   3   1  743.03   19.00
   1   3  -1  810.12   18.70
   1  -3   1  162.18    4.10
  -1  -3  -1  162.68    3.90
  -1  -3  -1  160.48    4.60
   1  -3   1  163.18    4.50
   1  -3   1  166.28    5.10
   1  -3   1  164.58    3.90
  -1  -3  -1  167.68    4.10
   1   3   1  162.98    4.90
   1   3   1  154.88    4.70
  -1   3  -1  165.08    5.20
   3  -3   1   93.39    2.40
  -3  -3  -1   96.89    2.50
  -3  -3  -1   99.19    2.40
   3  -3   1   98.99    2.40
   3  -3   1   98.29    3.00
   3  -3   1   98.09    3.60
  -3  -3  -1   99.39    2.70
   3  -3   1   92.89    2.90
   3  -3   1   99.79    2.60
  -3  -3  -1   92.79    3.20
   3  -3   1   97.39    2.40
  -3   3  -1   96.49    3.70
   3   3   1   79.19    2.40
  -3   3  -1   91.19    2.40
  -3   3  -1   99.49    2.40
   3   3   1   97.49    3.20
   3   3   1  103.79    3.40
  -3   3  -1   92.79    2.90
   3   3   1   80.99    2.50
  -3   3  -1   86.89    2.30
  -5  -3  -1    0.70    0.40
  -5  -3  -1    0.20    0.90
   5  -3   1    0.90    0.40
   5  -3   1    1.00    0.90
   5  -3   1    1.50    0.40
   5  -3   1    1.70    0.50
   5  -3   1    1.00    0.60
   5  -3   1    1.50    0.30
  -5  -3  -1    1.30    0.40
  -5  -3  -1    1.30    0.60
   5  -3   1    1.10    0.40
  -5   3  -1    0.80    1.00
   5   3   1    2.10    0.70
  -5   3  -1    1.30    0.40
   5   3   1    0.60    0.40
   5   3   1    1.60    1.10
   5   3   1    1.90    0.40
   5   3   1    1.30    0.50
  -5   3  -1    2.20    0.60
   7  -3   1  453.25   11.00
   7  -3   1  463.35   11.00
   7  -3   1  456.15   11.00
  -7  -3  -1  465.65   11.00
   7  -3   1  454.15   11.40
   7  -3   1  468.65   11.40
   7  -3   1  463.25   11.10
  -7  -3  -1  481.05   11.20
   7  -3   1  445.46   12.30
  -7  -3  -1  469.75   11.90
  -7  -3  -1  475.35   11.30
  -7   3  -1  486.85   11.50
   7   3   1  460.95   11.30
  -7   3  -1  478.35   11.10
   7   3   1  459.85   11.10
   7   3   1  473.35   11.20
   7   3   1  454.15   11.80
   7   3   1  468.25   11.00
  -7   3  -1  462.65   12.50
   9  -3   1   66.39    2.20
  -9  -3  -1   65.19    2.30
   9  -3   1   64.89    2.60
  -9  -3  -1   65.49    2.30
   9  -3   1   63.29    2.70
   9  -3   1   66.59    2.20
  -9  -3  -1   62.69    2.50
   9  -3   1   66.49    2.30
  -9  -3  -1   65.29    3.20
   9  -3   1   65.09    3.30
   9  -3   1   65.39    2.30
   9   3   1   66.29    2.30
  -9   3  -1   72.69    2.80
   9   3   1   67.69    2.90
   9   3   1   65.99    2.70
  -9   3  -1   65.69    3.40
   9   3   1   66.59    2.30
   9   3   1   70.59    2.30
  -9   3  -1   69.79    2.40
  11  -3   1   30.40    2.40
  11  -3   1   29.70    1.60
  11  -3   1   31.10    1.70
  11  -3   1   29.70    1.90
 -11  -3  -1   27.00    1.90
 -11  -3  -1   32.70    1.80
  11  -3   1   32.80    2.00
 -11  -3  -1   32.60    1.60
  11  -3   1   29.70    1.60
  11  -3   1   30.30    1.60
 -11  -3  -1   30.80    2.20
  11   3   1   32.30    1.80
  11   3   1   31.70    1.80
 -11   3  -1   30.60    1.70
 -11   3  -1   31.00    2.50
  11   3   1   32.00    1.60
  11   3   1   27.90    1.60
 -11   3  -1   31.90    1.60
 -11   3  -1   31.80    2.00
  11   3   1   31.30    2.20
 -13  -3  -1    1.50    0.90
  13  -3   1    2.30    1.30
  13  -3   1    1.90    0.70
  13  -3   1    3.30    0.90
  13  -3   1    2.50    1.00
 -13  -3  -1    3.30    1.50
 -13  -3  -1    2.20    0.90
  13  -3   1    5.40    1.20
 -13  -3  -1    2.10    0.70
  13  -3   1    3.20    0.90
  13   3   1    2.70    0.70
 -13   3  -1    3.00    0.80
  13   3   1    2.80    0.90
 -13   3  -1    4.80    0.90
  13   3   1    1.00    1.40
 -13   3  -1    3.60    1.20
 -13   3  -1    2.30    0.70
  13   3   1    2.60    1.00
 -13   3  -1    2.90    1.30
 -15  -3  -1   -0.70    0.90
 -15  -3  -1    0.10    0.90
  15  -3   1    2.90    1.20
  15  -3   1    0.60    1.40
 -15  -3  -1    2.20    1.70
 -15  -3  -1    1.10    0.90
  15  -3   1    0.60    1.20
  15  -3   1    0.50    0.90
  15  -3   1    0.30    0.70
  15  -3   1    0.60    0.80
  15  -3   1    0.90    1.00
 -15   3  -1   -0.10    0.90
 -15   3  -1    0.80    1.30
 -15   3  -1    1.80    1.30
  15   3   1    1.10    1.60
  15   3   1    0.50    0.90
  15   3   1   -0.40    0.90
  15   3   1   -0.10    0.70
 -15   3  -1    1.80    0.70
 -15   3  -1    0.70    0.80
  17  -3   1   62.29    3.00
 -17  -3  -1   74.39    4.30
  17  -3   1   74.49    3.10
 -17  -3  -1   65.79    3.10
  17  -3   1   73.99    3.70
 -17  -3  -1   67.29    3.10
  17  -3   1   70.09    4.20
 -17  -3  -1   65.49    3.30
  17  -3   1   72.49    3.30
  17  -3   1   70.09    3.10
  17  -3   1   70.79    3.60
  17   3   1   66.09    3.00
  17   3   1   65.19    3.60
 -17   3  -1   65.89    3.20
 -17   3  -1   67.59    3.00
 -17   3  -1   66.29    4.30
 -17   3  -1   71.69    3.00
 -17   3  -1   76.59    3.80
  17   3   1   64.79    3.10
  17   3   1   71.79    3.20
 -19  -3  -1   37.10    2.60
  19  -3   1   42.90    2.70
  19  -3   1   34.20    2.50
  19  -3   1   38.80    2.60
 -19  -3  -1   41.80    2.90
  19  -3   1   38.50    3.10
  19  -3   1   39.20    3.30
 -19  -3  -1   38.30    2.80
 -19  -3  -1   40.00    3.60
  19  -3   1   39.20    2.50
 -19   3  -1   42.50    2.60
 -19   3  -1   43.20    2.80
 -19   3  -1   41.90    2.70
 -19   3  -1   42.00    2.60
  19   3   1   46.50    2.80
  19   3   1   42.20    2.90
 -19   3  -1   38.00    3.30
  19   3   1   42.50    3.70
  19   3   1   42.90    2.80
  21  -3   1   -0.50    1.90
  21  -3   1    2.70    1.70
  21  -3   1   -1.90    1.30
  21  -3   1    2.80    1.40
  21  -3   1   -0.30    1.40
 -21  -3  -1   -0.40    1.30
 -21  -3  -1    2.00    2.00
 -21  -3  -1    0.50    1.50
  21  -3   1    1.90    1.10
 -21  -3  -1   -1.70    1.30
 -21   3  -1    0.20    1.80
 -21   3  -1    1.50    1.40
  21   3   1    0.40    1.40
  21   3   1   -0.90    1.30
 -21   3  -1    0.70    1.30
 -21   3  -1    1.50    1.10
  21   3   1    0.10    1.40
 -21   3  -1   -0.70    1.40
  21   3   1   -0.60    2.00
  23  -3   1   11.50    2.00
  23  -3   1   11.80    2.10
 -23  -3  -1   11.20    2.00
 -23  -3  -1   13.10    2.00
  23  -3   1   13.60    2.00
 -23  -3  -1   11.70    1.90
  23  -3   1    9.60    1.70
  23  -3   1   11.80    2.10
 -23   3  -1   10.50    1.90
 -23   3  -1    8.40    1.50
  23   3   1   11.90    2.10
 -23   3  -1    8.70    1.90
  23   3   1    7.00    1.90
  23   3   1   11.00    2.30
 -23   3  -1   10.00    1.60
  23   3   1   10.60    2.00
  25  -3   1    3.30    1.40
  25  -3   1    0.30    1.70
 -25  -3  -1    1.90    1.80
  25  -3   1    3.90    2.10
  25  -3   1    0.90    1.60
 -25  -3  -1   -0.20    2.00
  25  -3   1    0.70    1.30
 -25  -3  -1   -0.10    1.20
  25   3   1    2.00    1.40
 -25   3  -1    1.90    1.60
 -25   3  -1    0.70    1.70
  25   3   1    3.60    1.50
  25   3   1    0.60    1.80
 -25   3  -1    2.70    1.60
  25   3   1    2.70    1.80
 -25   3  -1   -0.90    1.60
  27  -3   1    0.20    1.90
 -27  -3  -1    3.70    2.40
  27  -3   1    6.20    2.40
 -27  -3  -1    0.20    1.40
  27  -3   1    4.00    1.50
  27  -3   1    2.10    1.60
 -27   3  -1    1.20    1.80
 -27   3  -1    3.50    1.50
  27   3   1    3.40    2.10
  27   3   1    8.40    2.80
  27   3   1    4.60    1.70
 -27   3  -1    1.50    1.90
 -29  -3  -1    3.80    1.60
 -29  -3  -1    5.90    2.20
  29  -3   1    4.20    1.70
  29  -3   1    4.90    1.80
  29  -3   1   11.70    2.70
 -29  -3  -1    4.10    2.60
 -29   3  -1    0.80    1.50
 -29   3  -1    2.90    1.60
  29   3   1    5.10    2.40
  29   3   1   10.50    3.10
  29   3   1    6.30    1.90
 -29   3  -1    3.70    2.00
 -28  -4   1    2.80    1.90
 -28  -4   1    2.10    2.40
 -28  -4   1    3.10    2.10
  28  -4  -1    2.40    1.90
  28  -4  -1   10.70    2.70
  28  -4  -1    4.20    2.20
 -28   4   1   -0.50    1.90
 -28   4   1    0.90    1.80
  28   4  -1    5.80    2.30
  28   4  -1    4.40    2.10
 -28   4   1    1.70    2.80
 -26  -4   1   13.10    2.70
  26  -4  -1    8.50    2.10
 -26  -4   1    7.50    2.00
  26  -4  -1    9.70    1.90
 -26  -4   1    9.10    2.20
  26   4  -1   13.40    2.40
  26   4  -1   11.40    2.40
  26   4  -1   13.60    2.70
 -26   4   1   10.60    3.00
 -26   4   1    6.30    1.80
 -26   4   1    9.30    2.00
  24  -4  -1   11.30    2.00
  24  -4  -1   16.70    2.80
 -24  -4   1    9.90    1.90
  24  -4  -1   10.00    1.90
 -24  -4   1    9.10    1.70
  24  -4  -1   11.20    2.10
 -24  -4   1    8.50    1.70
 -24  -4   1    8.50    1.90
 -24   4   1    9.50    1.90
 -24   4   1   11.50    2.00
  24   4  -1   10.80    1.80
  24   4  -1    8.70    1.80
 -24   4   1   11.50    2.20
 -24   4   1   13.80    3.10
  24   4  -1    8.30    1.80
  24   4  -1   15.30    3.00
  22  -4  -1    8.90    2.20
  22  -4  -1    7.30    1.70
  22  -4  -1    5.40    1.40
  22  -4  -1    7.40    1.60
  22  -4  -1    7.50    1.80
 -22  -4   1    6.80    1.80
 -22  -4   1    5.70    1.40
 -22  -4   1    6.40    2.00
 -22   4   1    7.20    2.60
 -22   4   1    3.60    1.70
  22   4  -1    5.70    1.90
  22   4  -1    5.30    1.30
  22   4  -1    5.90    2.40
 -22   4   1    6.00    1.50
 -22   4   1    3.60    1.50
  22   4  -1    6.80    1.80
 -22   4   1    4.50    1.30
  20  -4  -1   -0.20    2.00
 -20  -4   1   -0.40    1.50
 -20  -4   1   -0.10    0.90
  20  -4  -1   -0.40    1.20
  20  -4  -1   -1.70    1.20
  20  -4  -1    0.90    1.20
 -20  -4   1   -0.20    1.00
  20  -4  -1   -0.70    0.80
  20  -4  -1    1.10    1.60
 -20   4   1   -0.80    1.20
  20   4  -1   -1.20    1.90
  20   4  -1   -0.50    1.10
 -20   4   1    0.40    1.20
  20   4  -1    1.90    1.10
 -20   4   1    0.20    1.80
 -20   4   1   -0.20    0.80
  20   4  -1   -1.50    1.20
 -20   4   1   -0.30    1.10
  18  -4  -1   19.80    1.80
  18  -4  -1   23.30    1.90
 -18  -4   1   19.00    2.70
  18  -4  -1   22.80    3.20
 -18  -4   1   17.90    1.90
  18  -4  -1   15.40    2.20
 -18  -4   1   18.60    2.20
  18  -4  -1   18.90    1.90
  18  -4  -1   22.50    3.30
  18  -4  -1   20.50    1.90
 -18  -4   1   20.00    2.00
  18   4  -1   21.80    1.80
  18   4  -1   17.50    2.40
 -18   4   1   22.60    1.90
 -18   4   1   22.20    2.00
  18   4  -1   18.50    2.00
 -18   4   1   20.10    2.50
 -18   4   1   22.40    2.60
  18   4  -1   24.80    2.20
 -18   4   1   20.10    1.80
 -18   4   1   21.40    2.10
  16  -4  -1   44.10    2.50
  16  -4  -1   47.00    2.40
  16  -4  -1   44.90    2.70
  16  -4  -1   42.50    2.50
 -16  -4   1   45.60    2.60
 -16  -4   1   44.00    2.50
 -16  -4   1   48.40    3.30
  16  -4  -1   44.20    3.10
  16  -4  -1   48.30    3.90
  16  -4  -1   44.00    2.30
 -16  -4   1   46.00    2.60
  16   4  -1   42.10    2.50
 -16   4   1   46.30    2.50
 -16   4   1   47.10    2.30
 -16   4   1   45.90    3.30
  16   4  -1   44.90    3.00
 -16   4   1   48.00    2.80
 -16   4   1   41.80    2.50
 -16   4   1   47.60    2.30
  16   4  -1   44.40    2.50
  16   4  -1   47.80    2.60
  14  -4  -1   -0.80    0.80
  14  -4  -1    0.10    0.70
 -14  -4   1   -1.50    0.70
  14  -4  -1   -0.40    0.80
 -14  -4   1   -0.80    0.80
 -14  -4   1   -0.50    1.30
 -14  -4   1   -1.10    0.80
  14  -4  -1   -1.70    0.90
  14  -4  -1   -1.70    0.70
  14  -4  -1   -0.20    0.70
  14  -4  -1   -2.30    1.40
 -14   4   1    0.00    0.70
  14   4  -1   -0.60    1.50
 -14   4   1   -0.80    0.80
 -14   4   1   -0.30    0.70
  14   4  -1    0.00    0.80
 -14   4   1    0.30    0.90
 -14   4   1   -1.00    0.70
  14   4  -1   -0.20    0.80
 -14   4   1   -0.40    0.80
  14   4  -1   -0.30    0.90
 -12  -4   1   44.80    2.20
  12  -4  -1   45.40    3.50
  12  -4  -1   47.70    1.90
 -12  -4   1   44.10    2.10
  12  -4  -1   44.20    2.10
  12  -4  -1   46.60    1.90
 -12  -4   1   46.10    2.80
 -12  -4   1   45.30    2.10
  12  -4  -1   45.60    2.50
  12  -4  -1   45.60    2.30
  12  -4  -1   45.90    2.10
 -12   4   1   49.20    1.90
  12   4  -1   43.90    1.90
 -12   4   1   45.00    2.10
 -12   4   1   43.60    2.50
 -12   4   1   45.90    1.90
  12   4  -1   46.40    2.20
  12   4  -1   47.30    3.10
  12   4  -1   45.80    3.40
 -12   4   1   46.00    2.10
  12   4  -1   47.10    2.20
 -10  -4   1  308.27    7.80
  10  -4  -1  299.57    7.50
  10  -4  -1  303.07    7.60
 -10  -4   1  306.57    8.60
  10  -4  -1  303.27    7.70
  10  -4  -1  309.27    8.10
  10  -4  -1  300.97    9.60
 -10  -4   1  298.27    8.00
  10  -4  -1  303.97    7.80
 -10  -4   1  303.57    7.80
  10  -4  -1  304.17    8.50
 -10   4   1  303.97    7.50
  10   4  -1  302.87    8.60
  10   4  -1  293.27    8.80
  10   4  -1  305.07    7.80
 -10   4   1  309.97    7.80
  10   4  -1  310.67    7.80
 -10   4   1  305.57    7.80
 -10   4   1  304.07    8.60
 -10   4   1  304.97    7.50
  10   4  -1  307.27    7.70
  -8  -4   1  106.29    3.20
   8  -4  -1  105.79    3.90
  -8  -4   1  105.09    3.90
   8  -4  -1  101.99    4.50
   8  -4  -1  106.79    3.00
   8  -4  -1  107.29    3.20
   8  -4  -1  105.89    3.00
   8  -4  -1  109.39    3.50
  -8  -4   1  106.29    3.50
  -8  -4   1  105.59    3.20
   8  -4  -1  101.49    3.10
   8   4  -1  110.49    4.10
  -8   4   1  104.39    2.90
  -8   4   1  105.39    3.90
   8   4  -1  105.89    3.20
  -8   4   1  103.29    3.10
   8   4  -1  105.49    3.10
   8   4  -1  108.69    4.30
   6  -4  -1  285.37    7.00
   6  -4  -1  286.87    6.90
  -6  -4   1  279.67    7.90
   6  -4  -1  299.07    7.20
   6  -4  -1  282.87    7.90
  -6  -4   1  299.07    7.10
  -6  -4   1  291.47    7.10
   6  -4  -1  291.67    7.00
  -6  -4   1  300.27    7.40
   6  -4  -1  284.37    7.60
   6  -4  -1  289.77    8.90
   6   4  -1  291.97    8.30
  -6   4   1  285.97    6.90
   6   4  -1  290.77    7.90
  -6   4   1  288.47    8.00
   6   4  -1  298.37    7.10
   6   4  -1  286.97    7.00
  -6   4   1  287.17    7.10
  -4  -4   1  425.26   10.20
  -4  -4   1  425.76    9.80
  -4  -4   1  424.76    9.90
   4  -4  -1  416.66   10.50
   4  -4  -1  418.06    9.90
   4  -4  -1  421.76   11.60
   4  -4  -1  418.86    9.80
   4  -4  -1  387.96   10.60
   4  -4  -1  428.96    9.60
  -4  -4   1  424.16   10.70
  -4   4   1  422.16    9.60
  -4   4   1  420.16    9.90
   4   4  -1  421.16   11.20
   4   4  -1  429.06    9.80
   4   4  -1  430.46    9.80
  -4   4   1  418.26   10.80
   4   4  -1  412.76   10.70
  -2  -4   1    5.70    1.00
   2  -4  -1    5.50    0.60
  -2  -4   1    6.50    0.40
  -2  -4   1    5.30    0.70
   2  -4  -1    6.50    0.40
  -2  -4   1    6.50    0.40
  -2  -4   1    5.50    1.20
  -2  -4   1    6.80    0.50
   2  -4  -1    4.90    1.00
   2  -4  -1    6.50    1.20
   2   4  -1    5.50    1.30
  -2   4   1    6.20    0.50
  -2   4   1    6.30    1.10
   2   4  -1    6.90    1.10
  -2   4   1    4.80    1.40
  -2   4   1    6.70    0.70
   2   4  -1    6.80    0.40
   2   4  -1    6.80    0.50
   0  -4   1  190.18    4.60
   0  -4   1  194.58    5.50
   0  -4  -1  193.58    6.00
   0  -4  -1  188.08    4.50
   0  -4  -1  193.08    5.50
   0  -4   1  188.08    4.90
   0  -4   1  189.48    6.00
   0  -4  -1  191.08    4.80
   0   4   1  190.78    4.50
   0   4   1  186.88    5.50
   0   4  -1  185.38    5.30
   0   4  -1  192.58    6.20
   0   4   1  187.68    6.10
   0   4   1  192.78    4.70
  -2  -4  -1  606.64   14.80
   2  -4   1  588.94   15.30
  -2  -4  -1  607.74   13.70
  -2  -4  -1  613.44   13.60
   2  -4   1  588.34   13.70
   2  -4   1  596.44   14.00
   2  -4   1  602.74   14.60
  -2  -4  -1  603.24   14.00
  -2  -4  -1  599.24   13.70
  -2  -4  -1  590.54   15.00
  -2   4  -1  615.94   14.00
   2   4   1  595.94   15.20
   2   4   1  602.34   13.70
   2   4   1  611.04   13.90
  -2   4  -1  595.14   13.60
  -2   4  -1  586.14   14.40
   2   4   1  596.74   14.80
  -2   4  -1  599.04   15.50
   4  -4   1    7.70    0.50
   4  -4   1    7.70    1.30
   4  -4   1    6.20    0.60
   4  -4   1    8.60    1.10
  -4  -4  -1    7.10    0.80
  -4  -4  -1    6.80    1.10
  -4  -4  -1    7.10    0.70
  -4  -4  -1    9.00    0.60
  -4  -4  -1    6.00    1.20
   4  -4   1    6.50    0.70
   4  -4   1    8.40    0.50
  -4   4  -1    8.20    0.50
  -4   4  -1    7.80    0.60
  -4   4  -1    7.80    1.40
   4   4   1    8.30    1.40
  -4   4  -1    7.10    1.00
   4   4   1    7.50    0.80
   4   4   1    8.40    0.60
   4   4   1    7.50    1.40
  -6  -4  -1  387.66    9.60
   6  -4   1  388.86    9.20
  -6  -4  -1  395.36   10.40
   6  -4   1  376.66   10.90
   6  -4   1  395.26   10.00
   6  -4   1  387.46    9.90
   6  -4   1  388.76    9.30
  -6  -4  -1  385.26   10.00
  -6  -4  -1  399.46    9.30
   6  -4   1  402.76    9.20
  -6  -4  -1  395.66    9.40
   6  -4   1  388.16    9.40
  -6   4  -1  385.46   11.10
   6   4   1  372.46   10.30
  -6   4  -1  393.86    9.20
   6   4   1  386.16    9.40
   6   4   1  395.76   10.20
   6   4   1  400.76    9.30
  -6   4  -1  391.86   10.00
   6   4   1  389.06    9.40
  -6   4  -1  391.36    9.30
   8  -4   1  187.88    5.60
   8  -4   1  188.38    6.60
   8  -4   1  196.48    5.10
  -8  -4  -1  202.38    5.10
   8  -4   1  193.38    5.00
   8  -4   1  196.78    5.70
  -8  -4  -1  188.98    5.30
   8  -4   1  194.98    5.10
  -8  -4  -1  195.28    6.20
  -8  -4  -1  194.18    5.20
   8  -4   1  198.38    5.00
   8   4   1  194.58    5.20
   8   4   1  193.18    5.70
  -8   4  -1  194.68    5.00
  -8   4  -1  191.48    5.70
  -8   4  -1  197.38    5.10
  -8   4  -1  193.88    6.80
   8   4   1  199.88    6.20
   8   4   1  193.08    5.20
   8   4   1  200.08    5.10
  10  -4   1   11.40    1.40
 -10  -4  -1   12.20    1.00
  10  -4   1   12.50    1.30
  10  -4   1   11.60    1.10
 -10  -4  -1   12.20    1.10
 -10  -4  -1   11.40    1.80
  10  -4   1   11.30    2.00
  10  -4   1   10.70    1.10
 -10  -4  -1   10.00    1.10
  10  -4   1   12.20    1.00
  10  -4   1   11.30    1.00
 -10   4  -1   12.40    1.00
  10   4   1   11.00    1.20
  10   4   1   11.00    1.20
 -10   4  -1   13.00    1.50
 -10   4  -1   11.70    2.10
  10   4   1   12.00    1.10
  10   4   1    9.40    1.90
 -10   4  -1   11.70    1.10
  10   4   1   11.60    1.60
 -12  -4  -1    1.20    0.80
 -12  -4  -1    1.50    0.80
  12  -4   1    2.10    0.80
 -12  -4  -1    1.60    1.20
  12  -4   1    0.90    1.40
  12  -4   1    1.80    1.00
 -12  -4  -1    3.50    1.10
  12  -4   1    1.40    0.70
  12  -4   1    2.30    1.10
  12  -4   1    2.20    0.80
  12  -4   1    2.00    0.80
  12   4   1    1.50    0.80
 -12   4  -1    2.90    1.10
  12   4   1    1.20    0.80
  12   4   1    1.50    0.90
 -12   4  -1    3.50    1.60
 -12   4  -1    3.00    1.10
 -12   4  -1    1.70    0.70
 -12   4  -1    2.70    0.80
  12   4   1    2.40    1.30
 -12   4  -1    1.70    0.80
 -12   4  -1    2.60    0.80
  14  -4   1   48.40    3.50
  14  -4   1   48.80    2.60
  14  -4   1   49.70    2.30
  14  -4   1   47.80    2.30
 -14  -4  -1   46.30    2.20
 -14  -4  -1   47.00    3.10
 -14  -4  -1   45.60    2.40
  14  -4   1   47.50    2.40
 -14  -4  -1   47.90    2.50
  14  -4   1   48.70    2.80
  14  -4   1   51.89    2.30
 -14   4  -1   47.30    2.40
  14   4   1   47.10    2.20
 -14   4  -1   52.09    2.90
  14   4   1   50.49    2.50
 -14   4  -1   48.00    2.90
 -14   4  -1   51.69    2.30
 -14   4  -1   50.09    3.70
 -14   4  -1   47.80    2.30
 -14   4  -1   49.90    2.20
  14   4   1   51.69    3.50
  14   4   1   50.39    2.50
 -16  -4  -1   13.60    1.80
  16  -4   1   12.80    1.50
  16  -4   1   16.10    1.60
 -16  -4  -1   14.50    2.50
 -16  -4  -1   15.00    1.60
  16  -4   1   14.80    2.00
  16  -4   1   15.20    3.00
  16  -4   1   14.80    1.60
 -16  -4  -1   13.90    1.70
  16  -4   1   14.60    1.60
  16  -4   1   13.30    1.90
 -16   4  -1   16.50    1.60
 -16   4  -1   14.70    2.70
  16   4   1   16.70    1.90
 -16   4  -1   11.10    1.50
 -16   4  -1   14.40    1.50
 -16   4  -1   14.40    1.60
  16   4   1   17.70    2.50
  16   4   1   15.10    1.70
  16   4   1   13.30    1.60
 -16   4  -1   15.70    2.30
 -16   4  -1   19.10    2.40
  18  -4   1    6.70    1.40
  18  -4   1    5.20    2.00
 -18  -4  -1    3.90    1.40
  18  -4   1    5.00    1.30
 -18  -4  -1    6.30    1.50
  18  -4   1    5.20    1.40
 -18  -4  -1    6.50    1.70
  18  -4   1    3.00    1.30
 -18  -4  -1    5.20    2.20
  18  -4   1    3.50    1.30
  18  -4   1    5.90    1.90
 -18   4  -1    5.60    2.30
 -18   4  -1    6.70    1.40
 -18   4  -1    6.60    1.30
 -18   4  -1    7.10    1.40
 -18   4  -1    3.20    1.80
 -18   4  -1    6.00    1.60
  18   4   1    4.30    1.40
  18   4   1    6.00    1.80
 -18   4  -1    5.60    1.40
  18   4   1    6.20    1.40
  18   4   1    2.60    1.40
  20  -4   1   14.20    1.80
 -20  -4  -1   13.50    2.70
  20  -4   1   13.10    2.10
  20  -4   1   11.30    1.80
  20  -4   1   11.50    2.30
 -20  -4  -1   13.10    1.80
  20  -4   1   13.00    1.80
  20  -4   1   10.20    1.70
 -20  -4  -1    9.70    1.70
 -20  -4  -1   12.70    1.60
 -20   4  -1   12.80    2.50
  20   4   1   11.30    1.60
  20   4   1   13.80    2.70
 -20   4  -1   11.60    1.70
 -20   4  -1    9.90    1.70
  20   4   1   11.40    1.80
  20   4   1   12.90    1.90
 -20   4  -1    9.70    1.70
  22  -4   1   56.29    3.90
 -22  -4  -1   45.60    3.50
  22  -4   1   43.20    3.00
 -22  -4  -1   37.80    2.80
  22  -4   1   48.40    3.10
  22  -4   1   47.20    3.00
  22  -4   1   41.00    3.20
 -22  -4  -1   37.70    2.70
 -22  -4  -1   47.40    4.10
 -22   4  -1   43.70    3.10
 -22   4  -1   41.50    2.90
  22   4   1   56.79    4.50
 -22   4  -1   43.70    3.10
  22   4   1   33.80    2.70
  22   4   1   42.00    2.80
 -22   4  -1   39.00    2.50
  22   4   1   38.60    2.70
  24  -4   1   13.00    2.10
 -24  -4  -1   11.40    2.10
  24  -4   1   13.40    2.20
  24  -4   1   13.50    2.00
 -24  -4  -1    8.70    1.70
  24  -4   1   11.00    1.70
  24  -4   1    9.20    2.00
 -24  -4  -1   10.00    1.70
  24   4   1    8.80    1.70
 -24   4  -1   15.20    2.10
 -24   4  -1   12.00    2.00
  24   4   1   11.70    2.50
  24   4   1   12.90    2.20
 -24   4  -1    9.10    2.70
  24   4   1   10.40    1.80
 -24   4  -1   12.90    2.10
 -24   4  -1   12.30    2.00
  26  -4   1   -0.70    1.70
 -26  -4  -1    1.50    1.40
  26  -4   1    2.20    1.80
  26  -4   1    0.10    1.90
 -26  -4  -1    5.10    2.40
  26  -4   1    5.50    2.20
 -26   4  -1    3.40    1.80
  26   4   1    0.40    1.90
  26   4   1   -0.90    1.40
  26   4   1    2.30    1.90
 -26   4  -1    0.40    2.50
 -26   4  -1   -1.20    1.60
 -26   4  -1   -0.80    1.70
 -28  -4  -1    7.20    2.70
  28  -4   1   14.10    2.70
  28  -4   1    9.50    2.30
  28  -4   1    9.40    2.30
 -28  -4  -1    3.70    1.70
 -28   4  -1    4.30    2.10
  28   4   1    8.90    2.60
  28   4   1    6.90    1.90
  28   4   1    5.00    1.80
 -28   4  -1    9.60    2.20
 -28   4  -1    7.80    3.10
 -27  -5   1    5.30    2.60
  27  -5  -1    5.20    2.10
 -27  -5   1    2.00    1.80
  27  -5  -1    4.60    1.90
  27  -5  -1    8.30    2.60
 -27  -5   1    5.30    2.20
 -27   5   1    2.50    2.80
  27   5  -1    6.70    3.00
 -27   5   1    2.40    2.00
  27   5  -1    2.80    1.50
 -27   5   1    6.60    2.00
 -25  -5   1    6.20    2.40
 -25  -5   1    4.80    1.90
  25  -5  -1    9.70    2.40
 -25  -5   1    3.70    1.50
  25  -5  -1    2.40    1.70
  25  -5  -1    1.60    1.60
  25  -5  -1    3.60    1.90
 -25   5   1    3.00    1.60
 -25   5   1    5.30    2.70
  25   5  -1    6.50    2.00
  25   5  -1    7.80    2.90
 -25   5   1    4.00    1.30
 -25   5   1    2.60    1.80
  23  -5  -1    1.10    1.40
  23  -5  -1    1.60    1.50
  23  -5  -1    3.70    2.00
 -23  -5   1   -0.20    1.60
 -23  -5   1   -0.30    2.00
 -23  -5   1    1.00    1.10
  23  -5  -1    3.50    1.60
 -23   5   1    0.20    1.30
  23   5  -1    3.20    2.50
 -23   5   1    2.90    1.50
 -23   5   1    0.50    1.50
  23   5  -1    3.80    1.70
  23   5  -1   -0.20    1.00
 -23   5   1    1.70    2.30
 -21  -5   1    3.40    1.90
  21  -5  -1    0.70    1.20
  21  -5  -1    1.30    1.30
 -21  -5   1   -0.60    1.10
  21  -5  -1    1.60    1.80
 -21  -5   1    0.60    1.00
  21  -5  -1    0.30    1.10
 -21   5   1    0.40    2.00
  21   5  -1    2.70    2.30
  21   5  -1   -0.40    1.00
 -21   5   1    0.20    1.10
  21   5  -1    0.60    1.20
 -21   5   1   -0.60    1.20
 -21   5   1    2.30    2.30
 -21   5   1   -0.80    1.20
  21   5  -1   -0.20    1.20
  19  -5  -1    0.40    2.10
  19  -5  -1    0.30    1.20
  19  -5  -1    2.10    1.30
  19  -5  -1    0.60    0.90
 -19  -5   1    0.60    0.90
 -19  -5   1    4.00    1.90
 -19  -5   1   -1.20    1.60
 -19  -5   1    1.40    1.00
  19  -5  -1    2.00    1.20
  19  -5  -1   -0.10    1.10
 -19   5   1    0.40    1.00
  19   5  -1    0.70    1.30
  19   5  -1   -0.50    1.50
 -19   5   1   -0.80    0.80
  19   5  -1    0.50    1.00
  19   5  -1    1.20    1.20
 -19   5   1    1.20    1.10
 -19   5   1    0.50    2.00
 -19   5   1    0.60    1.40
 -19   5   1   -0.40    1.10
  17  -5  -1   -0.10    1.00
  17  -5  -1   -0.90    1.30
  17  -5  -1   -1.80    0.90
  17  -5  -1   -1.40    1.80
 -17  -5   1   -1.50    1.50
  17  -5  -1   -2.80    1.30
  17  -5  -1   -0.80    1.00
 -17  -5   1   -1.40    0.90
 -17  -5   1   -1.60    1.00
  17  -5  -1    5.60    1.20
 -17  -5   1   -0.10    0.80
 -17   5   1   -0.40    1.00
  17   5  -1   -1.10    0.80
  17   5  -1   -0.70    1.30
 -17   5   1   -0.90    1.40
  17   5  -1   -1.60    1.00
 -17   5   1   -1.70    0.90
 -17   5   1   -0.50    1.10
 -17   5   1   -0.80    0.90
  17   5  -1   -0.50    0.90
 -17   5   1    0.10    0.80
 -17   5   1   -0.70    1.30
  15  -5  -1    1.30    1.50
  15  -5  -1    1.30    0.90
 -15  -5   1   -0.10    1.30
 -15  -5   1    0.50    0.70
  15  -5  -1    0.70    2.00
  15  -5  -1    0.10    1.40
  15  -5  -1    1.40    0.80
 -15  -5   1    1.80    1.60
 -15  -5   1    0.30    1.00
  15  -5  -1    0.40    1.00
  15  -5  -1    0.70    1.00
  15   5  -1    1.00    1.00
  15   5  -1    2.70    0.80
 -15   5   1    3.20    1.30
 -15   5   1    0.40    0.90
 -15   5   1    1.40    1.00
  15   5  -1    1.30    1.80
 -15   5   1    0.30    1.40
 -15   5   1    2.60    1.00
 -15   5   1    1.90    0.80
  13  -5  -1    1.20    0.80
  13  -5  -1    1.40    1.10
  13  -5  -1    2.00    1.30
 -13  -5   1    1.20    0.80
 -13  -5   1    1.80    1.40
  13  -5  -1    0.50    1.80
 -13  -5   1    1.10    0.90
  13  -5  -1    0.40    0.80
  13  -5  -1    1.80    0.80
 -13  -5   1    0.60    0.70
  13  -5  -1    1.10    0.80
  13   5  -1    1.20    1.80
 -13   5   1    1.50    0.70
 -13   5   1    1.20    1.30
 -13   5   1    0.40    0.80
 -13   5   1    2.40    0.80
  13   5  -1    0.40    0.70
  13   5  -1    1.90    0.90
 -13   5   1    0.80    0.70
  11  -5  -1   -0.10    0.60
 -11  -5   1   -0.70    1.00
 -11  -5   1   -0.90    0.70
  11  -5  -1   -1.60    1.60
  11  -5  -1   -0.80    0.60
  11  -5  -1   -0.60    0.90
 -11  -5   1   -0.30    0.60
  11  -5  -1   -0.60    0.50
  11  -5  -1   -1.10    1.00
  11  -5  -1   -0.90    0.50
 -11   5   1   -0.70    0.60
  11   5  -1   -0.40    0.60
  11   5  -1    2.00    2.10
 -11   5   1   -0.50    1.00
 -11   5   1   -0.40    0.50
  11   5  -1    0.80    1.60
 -11   5   1   -0.40    0.50
  11   5  -1   -0.70    0.60
   9  -5  -1    9.30    1.00
   9  -5  -1   10.60    2.20
  -9  -5   1    9.80    1.10
   9  -5  -1    8.70    0.90
   9  -5  -1   11.60    1.40
   9  -5  -1   11.00    0.90
   9  -5  -1    9.70    1.00
  -9  -5   1   10.60    1.00
  -9  -5   1    9.70    1.00
   9  -5  -1    9.70    1.50
  -9  -5   1    9.10    1.60
   9   5  -1   11.90    1.00
  -9   5   1   11.50    0.80
  -9   5   1    8.80    0.90
   9   5  -1   11.40    2.20
   9   5  -1   11.70    1.90
   9   5  -1   10.50    1.00
  -9   5   1    9.00    1.00
  -9   5   1   10.10    1.50
   7  -5  -1   13.90    0.80
  -7  -5   1   12.60    1.80
   7  -5  -1   11.90    2.10
   7  -5  -1   11.40    0.90
  -7  -5   1   12.50    0.90
   7  -5  -1   13.50    1.10
   7  -5  -1   13.90    1.50
   7  -5  -1   14.00    0.90
  -7  -5   1   12.30    1.10
   7  -5  -1   13.70    1.50
  -7  -5   1   12.60    1.20
  -7   5   1   13.60    1.10
   7   5  -1   12.20    0.90
   7   5  -1   11.60    2.10
   7   5  -1   11.40    1.00
  -7   5   1   14.30    1.50
   7   5  -1   12.20    1.80
  -7   5   1   12.30    0.80
  -5  -5   1   14.70    1.30
  -5  -5   1   16.30    1.70
   5  -5  -1   13.70    1.50
  -5  -5   1   14.90    0.90
   5  -5  -1   17.40    1.00
  -5  -5   1   17.70    1.00
   5  -5  -1   16.50    0.80
   5  -5  -1   16.30    0.70
   5  -5  -1   12.80    2.20
  -5   5   1   16.40    0.70
   5   5  -1   16.70    0.90
  -5   5   1   16.10    1.00
   5   5  -1   18.30    2.00
   5   5  -1   15.40    2.20
   5   5  -1   17.10    0.90
  -5   5   1   13.80    1.70
   3  -5  -1  149.69    5.60
  -3  -5   1  149.39    3.80
  -3  -5   1  152.88    3.60
   3  -5  -1  147.09    3.90
  -3  -5   1  148.79    5.30
   3  -5  -1  149.49    3.60
   3  -5  -1  147.49    4.70
  -3  -5   1  150.38    4.20
  -3  -5   1  147.29    4.80
  -3  -5   1  145.49    3.60
   3   5  -1  149.59    3.60
  -3   5   1  148.19    3.90
  -3   5   1  139.69    5.60
   3   5  -1  149.99    5.50
   3   5  -1  152.98    3.60
   3   5  -1  141.19    4.60
  -3   5   1  144.49    4.90
  -3   5   1  141.79    3.60
  -1  -5   1   14.60    2.00
  -1  -5   1   14.60    0.80
   1  -5  -1   15.00    2.00
   1  -5  -1   14.30    1.00
  -1  -5   1   14.30    1.40
   1  -5  -1   15.10    0.50
   1  -5  -1   13.30    1.60
  -1  -5   1   12.20    1.10
  -1   5   1   12.60    2.00
  -1   5   1   14.70    0.60
  -1   5   1   15.00    1.50
  -1   5   1   16.20    0.90
   1   5  -1   13.80    2.10
   1   5  -1   14.90    1.60
   1  -5   1   29.60    2.20
  -1  -5  -1   30.10    2.30
   1  -5   1   27.20    1.40
  -1  -5  -1   28.70    2.10
  -1  -5  -1   30.40    0.90
   1  -5   1   30.60    1.10
  -1  -5  -1   29.20    1.40
   1  -5   1   28.00    2.00
  -1  -5  -1   29.70    0.90
  -1   5  -1   29.10    2.30
   1   5   1   28.70    2.20
   1   5   1   27.90    2.40
   1   5   1   30.10    0.90
   1   5   1   29.30    1.20
  -1   5  -1   29.90    2.00
   3  -5   1  327.57    8.10
  -3  -5  -1  327.07    8.10
  -3  -5  -1  323.87    9.20
  -3  -5  -1  329.47    7.70
   3  -5   1  328.77    9.80
   3  -5   1  331.07    8.80
  -3  -5  -1  329.17    7.60
   3  -5   1  321.07    7.60
  -3  -5  -1  329.17    9.00
  -3   5  -1  299.97    7.40
  -3   5  -1  331.47    7.50
  -3   5  -1  327.77    8.60
  -3   5  -1  333.07   10.00
   3   5   1  319.37    9.30
   3   5   1  325.27    7.80
   3   5   1  324.47    9.10
  -3   5  -1  328.37    7.60
   5  -5   1   31.40    1.50
   5  -5   1   28.00    1.20
   5  -5   1   30.60    2.80
  -5  -5  -1   32.80    1.50
   5  -5   1   32.60    1.20
   5  -5   1   32.00    1.20
   5  -5   1   30.60    1.80
  -5  -5  -1   30.80    1.20
  -5  -5  -1   26.80    1.30
  -5  -5  -1   30.60    2.10
  -5  -5  -1   29.00    2.20
   5   5   1   32.20    2.60
  -5   5  -1   29.80    1.90
  -5   5  -1   27.90    2.90
  -5   5  -1   31.40    1.20
   5   5   1   28.10    2.30
   5   5   1   28.20    1.40
  -5   5  -1   26.70    1.20
   7  -5   1  241.78    6.90
  -7  -5  -1  240.78    6.50
  -7  -5  -1  248.78    7.50
   7  -5   1  244.78    6.30
  -7  -5  -1  241.08    6.20
   7  -5   1  245.88    7.00
   7  -5   1  237.18    8.00
   7  -5   1  243.88    6.10
   7  -5   1  253.37    6.10
   7  -5   1  245.48    6.10
  -7  -5  -1  254.57    6.20
  -7  -5  -1  240.58    7.10
   7   5   1  251.67    6.20
  -7   5  -1  245.48    6.10
   7   5   1  237.08    6.30
   7   5   1  250.47    6.30
  -7   5  -1  244.68    7.00
   7   5   1  245.58    7.40
   7   5   1  238.08    7.40
  -7   5  -1  245.98    6.10
  -7   5  -1  241.18    8.30
  -9  -5  -1   89.19    2.80
  -9  -5  -1   86.19    4.00
   9  -5   1   87.79    2.70
   9  -5   1   86.69    4.50
  -9  -5  -1   87.39    2.90
   9  -5   1   87.19    2.70
   9  -5   1   88.89    2.90
   9  -5   1   86.79    3.40
   9  -5   1   86.69    3.50
  -9  -5  -1   88.59    3.20
   9  -5   1   87.49    2.80
   9   5   1   86.69    2.90
   9   5   1   90.99    4.20
   9   5   1   88.99    2.90
   9   5   1   87.79    3.70
  -9   5  -1   87.79    4.50
  -9   5  -1   87.39    2.80
   9   5   1   92.19    2.80
  -9   5  -1   85.29    3.50
  -9   5  -1   88.39    2.70
  11  -5   1    1.40    0.70
 -11  -5  -1    0.50    1.50
  11  -5   1    0.20    0.70
  11  -5   1    1.20    1.60
 -11  -5  -1    1.90    0.70
  11  -5   1   -0.10    0.90
 -11  -5  -1    1.30    0.70
  11  -5   1    1.80    0.70
  11  -5   1    1.10    0.60
 -11  -5  -1    1.20    1.10
  11  -5   1    0.80    1.10
 -11   5  -1   -0.20    0.90
 -11   5  -1    1.10    0.70
  11   5   1    1.50    0.80
  11   5   1    0.80    0.70
 -11   5  -1    2.50    1.70
  11   5   1    0.80    0.80
  11   5   1    0.60    1.30
 -11   5  -1    1.30    0.60
  13  -5   1    1.60    0.80
 -13  -5  -1    1.20    0.90
  13  -5   1    1.20    1.10
  13  -5   1    0.80    0.80
 -13  -5  -1    0.40    0.90
  13  -5   1    2.00    0.90
  13  -5   1    2.00    0.70
  13  -5   1    0.70    1.30
 -13  -5  -1    1.30    0.70
  13  -5   1    1.80    1.00
 -13  -5  -1    1.60    1.30
 -13   5  -1    1.70    1.00
  13   5   1    2.40    1.00
 -13   5  -1    2.60    0.80
  13   5   1    0.60    0.70
 -13   5  -1    1.70    0.70
  13   5   1    0.90    0.90
 -13   5  -1    1.40    0.90
 -13   5  -1    0.40    1.70
 -13   5  -1    2.90    1.20
  13   5   1    3.10    2.00
  15  -5   1    0.40    0.90
 -15  -5  -1   -0.30    1.00
  15  -5   1   -0.30    0.80
  15  -5   1   -0.80    1.20
 -15  -5  -1    0.30    0.70
 -15  -5  -1   -1.50    1.70
  15  -5   1    1.30    0.90
  15  -5   1    0.10    1.40
  15  -5   1   -0.10    1.70
  15  -5   1    0.90    1.00
 -15  -5  -1   -1.20    1.30
  15   5   1    0.00    0.90
 -15   5  -1    0.90    0.80
 -15   5  -1    0.20    1.40
 -15   5  -1    0.90    1.00
 -15   5  -1    0.50    1.90
 -15   5  -1   -0.70    0.90
  15   5   1    0.50    0.80
  15   5   1   -0.20    0.80
 -15   5  -1    1.70    1.30
 -15   5  -1    0.10    0.90
  15   5   1    2.00    2.00
  17  -5   1    6.30    1.30
  17  -5   1    5.30    1.40
 -17  -5  -1    6.90    1.40
  17  -5   1    7.00    1.30
  17  -5   1    7.40    1.40
 -17  -5  -1    5.10    1.40
  17  -5   1    8.00    1.80
  17  -5   1    8.40    2.40
  17  -5   1    8.10    1.90
 -17  -5  -1    7.10    1.40
 -17  -5  -1    7.50    2.30
 -17   5  -1    7.70    1.40
  17   5   1    6.60    1.50
 -17   5  -1    8.00    1.60
 -17   5  -1    7.60    1.30
 -17   5  -1    7.50    1.40
  17   5   1    7.60    1.40
 -17   5  -1    6.60    1.20
  17   5   1    7.40    1.50
 -17   5  -1    7.00    2.40
 -17   5  -1    7.00    1.80
  17   5   1    5.10    2.30
  19  -5   1    2.80    1.00
 -19  -5  -1    5.90    2.20
  19  -5   1    0.70    1.20
  19  -5   1    3.10    1.60
  19  -5   1    3.10    1.10
 -19  -5  -1    3.30    1.40
 -19  -5  -1    1.30    1.30
  19  -5   1    2.40    2.20
 -19  -5  -1    1.80    1.10
  19  -5   1   -0.10    1.30
  19  -5   1    2.90    1.90
  19   5   1    1.20    1.70
  19   5   1    2.00    1.10
  19   5   1    1.30    1.30
 -19   5  -1    1.50    1.20
 -19   5  -1    1.10    1.30
 -19   5  -1    3.40    2.20
 -19   5  -1    1.80    1.80
 -19   5  -1    2.40    1.70
 -19   5  -1    3.60    1.20
  19   5   1    2.70    1.20
 -19   5  -1    2.60    1.00
  21  -5   1    7.20    1.90
 -21  -5  -1    5.70    1.70
  21  -5   1    3.10    1.50
 -21  -5  -1    3.30    1.50
  21  -5   1    7.00    1.60
 -21  -5  -1    5.90    2.40
  21  -5   1    3.50    1.50
 -21  -5  -1    7.80    1.70
  21  -5   1    5.70    1.60
  21   5   1    4.70    1.30
 -21   5  -1    2.30    1.30
 -21   5  -1    4.10    1.50
 -21   5  -1    4.80    1.50
 -21   5  -1    4.50    2.00
  21   5   1    4.10    1.30
  21   5   1    4.50    2.50
 -21   5  -1    3.90    1.50
  21   5   1    6.00    1.80
  23  -5   1    3.50    1.80
 -23  -5  -1    3.50    2.00
 -23  -5  -1    4.10    1.60
  23  -5   1    2.60    1.60
  23  -5   1    3.40    1.50
 -23  -5  -1    2.00    1.60
  23  -5   1   -0.30    1.40
  23  -5   1   -0.80    1.50
  23   5   1    4.20    1.80
 -23   5  -1    2.50    1.50
  23   5   1    1.70    1.60
 -23   5  -1    3.70    1.50
  23   5   1    5.10    1.90
 -23   5  -1    1.90    1.40
 -23   5  -1    1.90    2.00
  23   5   1    2.50    1.90
 -23   5  -1    3.00    1.60
  25  -5   1    1.60    1.60
  25  -5   1    5.20    2.00
 -25  -5  -1    3.70    2.30
  25  -5   1    1.00    1.70
  25  -5   1    1.50    1.60
 -25  -5  -1    2.40    1.70
 -25   5  -1    2.00    1.60
  25   5   1    2.30    1.90
 -25   5  -1    1.80    1.60
  25   5   1    3.40    2.20
  25   5   1    2.60    1.90
 -25   5  -1   -1.10    1.50
 -25   5  -1    1.50    2.20
  27  -5   1    0.00    1.80
 -27  -5  -1    0.60    1.50
  27  -5   1    2.00    1.90
 -27  -5  -1    5.10    2.60
 -27   5  -1    0.10    1.80
  27   5   1    2.50    1.60
 -27   5  -1    0.00    1.70
  27   5   1    4.10    2.90
  27   5   1    1.10    2.00
  28  -6  -1    3.50    2.40
  26  -6  -1    6.10    2.50
 -26  -6   1    1.60    1.70
 -26  -6   1    2.30    2.40
 -26  -6   1    0.80    1.90
  26  -6  -1    2.00    1.80
 -26   6   1    2.60    1.80
 -26   6   1    1.10    2.50
  26   6  -1    3.10    2.30
  26   6  -1    4.30    1.90
  24  -6  -1   13.00    2.70
 -24  -6   1    8.90    2.10
 -24  -6   1    9.00    1.90
 -24  -6   1    8.70    2.00
  24  -6  -1    7.20    1.90
 -24  -6   1    8.10    1.70
  24   6  -1    9.60    1.70
 -24   6   1    6.60    2.10
 -24   6   1    7.10    2.70
 -24   6   1    7.20    1.90
  24   6  -1    8.00    2.50
 -22  -6   1    6.40    1.60
 -22  -6   1    6.20    1.80
  22  -6  -1    7.20    1.70
 -22  -6   1    8.20    1.90
  22  -6  -1    5.90    1.50
  22  -6  -1    7.60    2.30
  22   6  -1    5.80    2.70
 -22   6   1    5.80    1.70
  22   6  -1    4.80    1.50
 -22   6   1    6.50    2.50
  22   6  -1    7.20    1.80
 -22   6   1    5.90    1.50
 -20  -6   1    4.10    1.90
  20  -6  -1    4.10    2.70
  20  -6  -1    1.40    1.30
  20  -6  -1    3.10    1.50
 -20  -6   1    2.20    1.50
  20  -6  -1    3.70    1.90
 -20  -6   1    1.70    1.30
  20  -6  -1    3.10    1.40
 -20  -6   1    2.30    1.50
 -20   6   1    1.80    1.20
 -20   6   1    3.30    1.40
 -20   6   1    4.90    2.70
  20   6  -1    1.60    1.30
 -20   6   1    1.70    2.00
 -20   6   1    2.90    1.20
  20   6  -1    1.20    2.40
  20   6  -1    3.00    1.40
  18  -6  -1    8.40    1.50
 -18  -6   1    8.60    1.50
  18  -6  -1    7.90    1.30
 -18  -6   1    9.50    2.00
  18  -6  -1   11.70    3.20
  18  -6  -1    6.00    1.30
  18  -6  -1    7.30    2.00
 -18  -6   1    8.70    1.60
 -18  -6   1   12.50    2.30
  18   6  -1    7.70    1.50
  18   6  -1    9.50    2.60
 -18   6   1    7.50    1.40
 -18   6   1   11.80    2.40
 -18   6   1    9.70    1.50
  18   6  -1    9.10    1.40
 -18   6   1    8.90    1.30
 -18   6   1   10.40    2.30
 -18   6   1    9.40    3.00
  16  -6  -1   28.60    2.10
  16  -6  -1   28.80    4.10
 -16  -6   1   33.50    3.20
 -16  -6   1   27.70    2.20
 -16  -6   1   29.60    2.30
  16  -6  -1   28.70    2.10
  16  -6  -1   30.80    3.00
 -16  -6   1   30.20    2.70
  16  -6  -1   25.70    1.80
  16  -6  -1   30.10    2.80
 -16   6   1   29.10    2.10
 -16   6   1   33.40    2.70
  16   6  -1   27.30    2.10
 -16   6   1   31.60    2.20
  16   6  -1   27.30    2.20
 -16   6   1   29.10    2.10
 -16   6   1   28.00    1.80
  16   6  -1   35.50    3.70
 -16   6   1   24.00    4.00
 -16   6   1   30.40    3.10
 -14  -6   1   -0.20    1.00
 -14  -6   1   -0.30    0.80
  14  -6  -1    0.70    1.10
  14  -6  -1   -0.60    2.10
 -14  -6   1   -0.40    1.60
  14  -6  -1   -0.10    0.90
  14  -6  -1   -0.50    0.90
  14  -6  -1    0.30    0.70
 -14  -6   1   -1.40    1.30
  14  -6  -1   -0.70    1.30
  14  -6  -1   -0.20    1.00
 -14   6   1    0.90    1.10
  14   6  -1    0.90    0.90
  14   6  -1   -0.60    0.80
 -14   6   1    0.00    2.10
  14   6  -1    1.20    1.50
 -14   6   1   -0.10    0.80
 -14   6   1   -1.30    0.90
 -14   6   1   -0.10    0.80
 -14   6   1    1.30    0.90
  12  -6  -1   49.00    2.00
  12  -6  -1   46.20    2.20
 -12  -6   1   47.90    2.30
  12  -6  -1   49.00    2.20
 -12  -6   1   46.80    2.30
  12  -6  -1   46.10    2.80
 -12  -6   1   45.40    2.90
  12  -6  -1   45.70    2.10
  12  -6  -1   43.60    3.70
 -12  -6   1   46.50    2.50
  12  -6  -1   48.00    3.10
 -12   6   1   45.30    2.20
 -12   6   1   48.60    3.30
  12   6  -1   46.90    3.20
 -12   6   1   44.00    1.90
 -12   6   1   46.80    2.10
  12   6  -1   46.60    2.30
 -12   6   1   52.09    4.30
  12   6  -1   48.00    5.40
  12   6  -1   43.70    2.20
  10  -6  -1  100.59    3.20
  10  -6  -1  103.49    4.00
  10  -6  -1  101.59    3.00
 -10  -6   1  103.99    3.30
 -10  -6   1  105.39    3.30
  10  -6  -1   97.29    3.10
  10  -6  -1  101.39    5.50
  10  -6  -1  103.69    3.40
  10  -6  -1  102.29    4.40
 -10  -6   1   97.89    3.60
 -10  -6   1   95.19    4.20
 -10   6   1  100.39    3.30
  10   6  -1  103.29    3.20
 -10   6   1  100.89    3.00
 -10   6   1  102.39    3.20
 -10   6   1  104.09    5.60
 -10   6   1  107.29    4.50
  10   6  -1  100.89    3.30
  10   6  -1  108.79    5.30
  10   6  -1  101.79    4.70
   8  -6  -1    4.60    0.80
   8  -6  -1    5.80    1.30
   8  -6  -1    5.10    0.60
  -8  -6   1    5.00    0.80
   8  -6  -1    5.90    2.00
   8  -6  -1    3.70    0.60
   8  -6  -1    4.90    1.40
  -8  -6   1    5.50    0.70
  -8  -6   1    3.10    1.40
  -8  -6   1    3.40    1.10
  -8   6   1    5.40    1.70
  -8   6   1    5.50    0.60
   8   6  -1    5.80    1.90
   8   6  -1    4.20    0.70
  -8   6   1    4.90    1.40
  -8   6   1    5.40    0.80
   8   6  -1    5.50    0.80
   8   6  -1    5.50    1.70
  -8   6   1    4.70    0.70
  -6  -6   1  203.28    5.80
   6  -6  -1  214.38    5.50
  -6  -6   1  200.78    6.50
  -6  -6   1  204.18    5.40
   6  -6  -1  209.88    5.10
   6  -6  -1  215.28    6.40
  -6  -6   1  204.98    5.30
   6  -6  -1  214.38    7.90
   6  -6  -1  208.88    5.20
  -6   6   1  208.38    5.50
  -6   6   1  207.68    7.90
  -6   6   1  217.08    5.20
  -6   6   1  209.78    6.80
  -6   6   1  207.08    5.00
   6   6  -1  208.48    7.30
   6   6  -1  206.58    5.30
   6   6  -1  211.98    6.70
   6   6  -1  217.08    5.30
  -4  -6   1  374.26    9.50
  -4  -6   1  384.96   10.30
   4  -6  -1  367.86   11.30
   4  -6  -1  373.96    8.60
   4  -6  -1  380.86    9.10
  -4  -6   1  373.56   10.80
  -4  -6   1  374.66    8.90
  -4  -6   1  368.36    8.70
   4  -6  -1  380.96   10.10
   4   6  -1  365.86   10.20
   4   6  -1  353.26    8.70
  -4   6   1  356.76   10.20
  -4   6   1  366.16   11.50
   4   6  -1  382.46   11.10
  -4   6   1  377.56    9.00
   4   6  -1  381.86    8.70
  -2  -6   1    5.50    0.80
  -2  -6   1    5.50    1.10
   2  -6  -1    6.70    0.80
   2  -6  -1    6.10    1.30
  -2  -6   1    6.70    0.60
   2  -6  -1    5.70    1.70
   2  -6  -1    6.70    0.30
  -2  -6   1    7.20    1.70
  -2   6   1    6.30    0.40
  -2   6   1    6.40    1.40
   2   6  -1    5.00    1.30
   2   6  -1    6.50    1.80
  -2   6   1    6.60    1.60
  -2   6   1    6.60    0.70
   2   6  -1    6.70    0.50
   0  -6  -1    7.20    0.90
   0  -6   1    6.50    0.90
   0  -6   1    6.80    1.80
   0  -6  -1    6.60    1.40
   0  -6   1    7.40    0.60
   0  -6  -1    5.10    1.30
   0  -6   1    5.40    1.30
   0   6  -1    6.80    1.30
   0   6  -1    7.80    1.90
   0   6   1    6.50    1.50
   0   6   1    7.10    1.80
   0   6   1    7.30    0.70
  -2  -6  -1  245.58    7.40
  -2  -6  -1  232.78    5.80
   2  -6   1  238.98    5.90
  -2  -6  -1  251.67    5.80
   2  -6   1  256.27    8.40
   2  -6   1  248.88    6.50
   2  -6   1  250.87    7.30
  -2  -6  -1  245.68    6.40
  -2  -6  -1  252.57    8.00
  -2  -6  -1  241.38    5.80
   2   6   1  246.28    7.60
   2   6   1  255.77    8.20
   2   6   1  245.58    6.10
  -2   6  -1  247.68    8.50
  -2   6  -1  240.08    7.10
   4  -6   1   87.99    3.50
  -4  -6  -1   92.39    4.10
  -4  -6  -1   88.09    3.70
   4  -6   1   88.49    2.50
   4  -6   1   93.19    4.70
  -4  -6  -1   91.59    2.50
  -4  -6  -1   88.59    2.50
   4  -6   1   90.39    2.90
  -4  -6  -1   89.89    3.00
  -4   6  -1   83.79    3.50
   4   6   1   92.99    4.30
  -4   6  -1   83.99    2.20
   4   6   1   90.79    2.70
  -4   6  -1   91.99    2.30
  -4   6  -1   89.69    4.80
  -4   6  -1   90.09    2.40
   4   6   1   88.59    4.10
   6  -6   1    0.80    0.40
  -6  -6  -1    0.30    0.90
  -6  -6  -1    0.30    0.60
  -6  -6  -1    1.20    0.50
   6  -6   1    1.00    0.70
  -6  -6  -1    0.00    1.10
   6  -6   1   -0.80    0.40
   6  -6   1    0.30    0.80
  -6  -6  -1    0.70    0.50
   6  -6   1    0.80    1.20
  -6   6  -1   -0.30    0.40
  -6   6  -1   -0.20    0.90
   6   6   1    0.00    0.50
   6   6   1    1.50    1.60
  -6   6  -1    0.70    1.20
  -6   6  -1    0.60    0.40
   6   6   1    0.80    1.30
  -8  -6  -1   61.59    3.50
   8  -6   1   60.29    2.00
   8  -6   1   59.89    2.30
   8  -6   1   62.79    3.00
   8  -6   1   58.99    3.80
  -8  -6  -1   62.09    2.20
   8  -6   1   59.59    2.10
   8  -6   1   57.79    3.00
  -8  -6  -1   63.59    2.70
   8  -6   1   61.29    2.10
  -8  -6  -1   59.89    2.20
  -8   6  -1   60.09    3.90
  -8   6  -1   57.99    2.00
   8   6   1   59.39    2.20
   8   6   1   61.29    3.40
  -8   6  -1   60.29    2.10
   8   6   1   61.89    3.50
   8   6   1   58.59    2.20
  -8   6  -1   57.69    3.00
  10  -6   1   59.69    2.20
 -10  -6  -1   63.69    2.50
  10  -6   1   53.49    3.80
  10  -6   1   56.79    3.00
 -10  -6  -1   56.29    3.60
  10  -6   1   56.59    2.10
  10  -6   1   59.59    2.30
  10  -6   1   54.39    3.00
 -10  -6  -1   58.49    2.30
 -10  -6  -1   60.09    2.80
  10  -6   1   59.29    2.20
 -10   6  -1   56.29    2.10
  10   6   1   54.69    2.40
 -10   6  -1   56.79    2.20
  10   6   1   59.29    2.30
  10   6   1   60.59    3.60
  10   6   1   60.39    3.90
 -10   6  -1   62.79    4.40
  10   6   1   58.19    2.30
 -10   6  -1   57.49    3.10
  12  -6   1    2.80    1.30
 -12  -6  -1    3.10    0.90
  12  -6   1    4.10    0.80
  12  -6   1    4.80    1.00
  12  -6   1    2.70    0.90
 -12  -6  -1    1.30    1.80
 -12  -6  -1    4.80    1.00
  12  -6   1    3.60    1.20
 -12  -6  -1    1.80    1.30
  12  -6   1    3.00    2.10
  12  -6   1    3.50    0.90
 -12   6  -1    3.20    0.90
 -12   6  -1    3.80    1.80
 -12   6  -1    3.50    0.90
  12   6   1    3.60    1.00
  12   6   1    2.20    1.00
  12   6   1    4.50    1.70
  12   6   1    2.00    0.90
 -12   6  -1    4.80    1.40
 -12   6  -1    3.20    0.80
  14  -6   1    3.40    1.10
 -14  -6  -1    3.10    1.10
  14  -6   1    3.30    1.40
  14  -6   1    4.30    2.40
  14  -6   1    4.30    1.00
 -14  -6  -1    2.30    1.50
  14  -6   1    2.20    0.90
 -14  -6  -1    3.10    1.10
 -14  -6  -1    1.70    2.00
  14  -6   1    2.70    1.10
  14  -6   1    2.40    1.60
 -14   6  -1    3.20    1.40
 -14   6  -1    2.60    2.30
  14   6   1    0.40    1.10
  14   6   1    3.50    1.20
 -14   6  -1    2.70    1.00
  14   6   1    2.70    1.00
 -14   6  -1    3.30    0.90
 -14   6  -1    2.60    1.00
  14   6   1    5.60    2.40
  16  -6   1    7.10    1.30
  16  -6   1    6.20    1.40
  16  -6   1    6.90    1.70
 -16  -6  -1    6.20    1.30
 -16  -6  -1    6.30    1.80
  16  -6   1    5.40    1.20
  16  -6   1    6.80    2.20
 -16  -6  -1    5.40    2.30
  16  -6   1    5.60    1.30
  16  -6   1    4.90    1.80
 -16  -6  -1    3.70    1.30
  16   6   1    4.30    2.50
  16   6   1    6.20    1.40
 -16   6  -1    6.60    1.60
 -16   6  -1    5.20    1.30
  16   6   1    4.20    1.20
 -16   6  -1    6.90    2.60
 -16   6  -1    5.60    1.30
 -16   6  -1    8.00    1.90
  16   6   1    5.70    1.40
 -16   6  -1    6.20    1.10
 -16   6  -1    6.50    1.20
  18  -6   1    1.00    1.10
  18  -6   1    3.10    1.20
  18  -6   1    1.60    2.40
 -18  -6  -1    0.90    1.20
  18  -6   1    1.90    1.50
 -18  -6  -1    4.50    1.40
  18  -6   1    1.40    1.10
 -18  -6  -1    0.70    1.30
 -18  -6  -1    5.70    2.30
  18  -6   1    1.80    1.80
  18  -6   1    0.00    1.20
  18   6   1    1.30    1.30
 -18   6  -1    3.10    1.80
 -18   6  -1    2.20    2.30
 -18   6  -1    2.50    1.30
  18   6   1    0.60    1.80
 -18   6  -1    0.80    1.10
  18   6   1    2.00    1.30
  18   6   1    2.00    1.30
 -18   6  -1    2.80    1.10
 -18   6  -1    3.90    1.90
 -18   6  -1    3.20    1.20
  20  -6   1   -1.00    1.20
 -20  -6  -1    0.20    1.30
 -20  -6  -1    1.70    1.70
 -20  -6  -1    0.30    1.40
 -20  -6  -1   -0.30    1.30
  20  -6   1   -1.80    1.30
  20  -6   1   -0.30    1.20
  20  -6   1    0.10    2.30
  20  -6   1   -0.20    1.50
  20  -6   1   -2.60    1.90
  20  -6   1    0.00    1.10
 -20   6  -1    1.00    2.20
 -20   6  -1   -1.00    1.60
 -20   6  -1    1.30    1.90
  20   6   1    0.30    1.30
  20   6   1    0.60    1.50
 -20   6  -1   -0.10    1.10
 -20   6  -1    0.60    1.30
  20   6   1   -0.90    2.30
 -20   6  -1   -0.30    1.20
 -20   6  -1   -1.20    1.10
  20   6   1   -0.50    1.30
 -22  -6  -1    6.80    1.80
  22  -6   1    7.00    2.10
  22  -6   1    5.80    1.60
 -22  -6  -1   11.80    2.60
  22  -6   1    8.00    1.70
 -22  -6  -1    6.50    1.50
 -22  -6  -1    5.50    1.60
  22  -6   1    8.40    2.50
 -22   6  -1    7.40    1.60
  22   6   1    7.80    1.90
 -22   6  -1    6.20    2.30
 -22   6  -1    5.60    1.60
  22   6   1    3.80    1.30
 -22   6  -1    4.60    1.60
  22   6   1    6.30    1.50
 -24  -6  -1    6.50    2.00
 -24  -6  -1    7.80    2.00
  24  -6   1    8.60    1.90
  24  -6   1   10.50    2.00
 -24  -6  -1    8.20    2.00
  24   6   1   11.60    2.20
  24   6   1   12.10    3.20
  24   6   1    8.10    2.00
  24   6   1   13.60    2.30
 -24   6  -1    9.10    1.80
 -24   6  -1    6.80    1.80
 -26  -6  -1    6.60    2.70
  26  -6   1    2.10    2.00
 -26  -6  -1   -0.30    1.90
  26   6   1    1.40    2.00
 -26   6  -1    2.50    1.80
  26   6   1    3.00    2.00
  26   6   1   -1.60    2.80
 -25  -7   1   -1.40    1.50
  25  -7  -1    1.10    2.60
 -25  -7   1   -2.00    1.20
 -25  -7   1   -3.50    2.20
  25   7  -1    1.20    1.30
  25   7  -1   -1.40    2.80
 -25   7   1   -1.40    2.40
 -23  -7   1   -1.40    1.60
  23  -7  -1    1.00    2.00
 -23  -7   1    3.30    2.30
 -23   7   1    2.50    2.40
  23   7  -1    2.10    1.50
  23   7  -1   -0.30    2.70
  21  -7  -1    1.20    1.90
 -21  -7   1   -0.50    1.90
  21  -7  -1   -1.40    2.70
 -21  -7   1   -2.90    1.40
 -21   7   1    0.70    2.60
  21   7  -1    0.30    1.30
  21   7  -1   -2.40    2.40
 -21   7   1    0.10    2.10
  19  -7  -1   -0.60    1.70
 -19  -7   1    1.50    1.90
  19  -7  -1   -0.50    2.60
 -19  -7   1   -0.70    1.30
 -19  -7   1   -1.00    1.30
 -19   7   1   -0.40    1.80
  19   7  -1   -1.40    1.70
 -19   7   1    1.70    2.60
 -19   7   1   -2.00    1.20
  19   7  -1    1.00    1.20
  17  -7  -1    0.10    1.90
 -17  -7   1    0.40    1.70
  17  -7  -1    1.90    1.70
  17  -7  -1   -0.80    1.30
 -17  -7   1    0.90    1.20
  17  -7  -1    1.60    1.60
 -17  -7   1   -1.20    1.60
 -17   7   1   -1.40    1.60
 -17   7   1   -0.30    1.10
  17   7  -1   -3.90    2.20
  17   7  -1   -1.40    1.10
 -17   7   1   -1.30    2.60
 -17   7   1    1.60    1.40
  15  -7  -1   -0.70    1.00
 -15  -7   1    0.20    1.60
  15  -7  -1   -0.90    1.40
 -15  -7   1    2.10    1.50
  15  -7  -1   -0.30    1.50
  15  -7  -1   -0.60    2.50
 -15  -7   1   -0.80    1.00
  15   7  -1    0.20    1.70
  15   7  -1    0.40    1.00
 -15   7   1    1.50    1.70
 -15   7   1    0.00    0.90
 -15   7   1    0.30    2.60
  15   7  -1    0.40    1.00
 -13  -7   1    0.30    1.60
  13  -7  -1    0.80    2.50
 -13  -7   1    0.40    1.00
  13  -7  -1    0.60    0.90
  13  -7  -1   -0.20    1.40
  13  -7  -1    0.10    1.40
 -13  -7   1    1.70    1.10
  13   7  -1    0.50    1.00
 -13   7   1    2.70    1.60
  13   7  -1    1.80    0.90
  13   7  -1    0.40    1.60
 -13   7   1    0.50    0.80
 -13   7   1    1.90    2.50
  11  -7  -1    9.60    2.00
 -11  -7   1    8.30    1.70
 -11  -7   1   10.10    1.30
  11  -7  -1    9.70    1.20
  11  -7  -1   10.90    3.00
  11  -7  -1    8.80    1.80
  11  -7  -1    8.20    1.10
 -11  -7   1    9.20    1.40
 -11   7   1   10.60    2.00
  11   7  -1    7.40    1.90
  11   7  -1    9.40    1.30
 -11   7   1   13.10    3.00
  11   7  -1   10.50    2.80
  11   7  -1   10.40    1.20
 -11   7   1    9.30    1.10
   9  -7  -1    3.10    0.90
   9  -7  -1    2.90    1.80
  -9  -7   1    2.60    0.80
  -9  -7   1    1.90    1.30
  -9  -7   1   -0.60    1.60
   9  -7  -1    2.70    1.20
  -9   7   1    2.10    1.50
  -9   7   1    3.00    1.80
   9   7  -1    3.90    0.80
   9   7  -1    2.20    2.00
   9   7  -1    3.50    2.50
  -9   7   1    3.10    0.80
   7  -7  -1   19.40    3.30
  -7  -7   1   18.70    2.10
  -7  -7   1   21.30    1.40
   7  -7  -1   16.10    2.10
  -7  -7   1   20.10    1.90
   7  -7  -1   21.70    1.40
  -7   7   1   18.10    3.30
  -7   7   1   18.60    1.30
   7   7  -1   20.00    2.90
  -7   7   1   21.70    2.50
   7   7  -1   20.10    3.10
  -5  -7   1    0.20    1.00
   5  -7  -1   -0.50    1.20
  -5  -7   1    0.40    0.60
  -5  -7   1    1.60    1.30
  -5  -7   1    1.30    0.80
   5  -7  -1    0.10    0.60
   5  -7  -1   -2.00    1.70
   5   7  -1    0.30    1.60
  -5   7   1   -0.10    1.20
  -5   7   1    0.80    0.60
   5   7  -1    0.60    1.80
  -5   7   1   -0.70    1.80
   3  -7  -1   26.90    2.40
  -3  -7   1   28.70    3.00
  -3  -7   1   25.50    1.80
   3  -7  -1   30.20    2.80
  -3  -7   1   26.20    2.10
   3  -7  -1   26.60    1.60
  -3  -7   1   28.90    1.30
   3   7  -1   28.00    2.60
  -3   7   1   29.00    1.40
  -3   7   1   29.10    2.30
   3   7  -1   27.70    3.20
  -3   7   1   27.10    2.80
  -1  -7   1   17.90    1.50
  -1  -7   1   17.40    2.10
   1  -7  -1   17.20    1.30
   1  -7  -1   19.90    2.20
  -1  -7   1   16.80    2.80
   1  -7  -1   19.10    2.30
   1   7  -1   21.50    2.30
  -1   7   1   17.90    2.40
  -1   7   1   18.60    1.10
   1   7  -1   17.80    3.00
  -1   7   1   17.40    2.40
   1  -7   1   68.99    2.60
  -1  -7  -1   64.29    4.00
  -1  -7  -1   64.29    3.40
   1  -7   1   61.49    3.10
  -1  -7  -1   62.99    2.40
   1  -7   1   65.49    3.90
  -1   7  -1   62.19    3.20
  -1   7  -1   65.89    4.10
   1   7   1   66.19    3.70
   1   7   1   63.69    2.10
   1   7   1   68.29    4.20
   3  -7   1   49.20    3.80
   3  -7   1   44.40    2.60
  -3  -7  -1   48.20    2.20
   3  -7   1   51.59    2.20
  -3  -7  -1   51.39    3.50
  -3  -7  -1   47.20    3.00
  -3   7  -1   50.19    3.60
   3   7   1   50.09    1.80
  -3   7  -1   49.60    3.00
   3   7   1   49.00    3.00
   3   7   1   50.99    3.60
   5  -7   1   11.80    1.60
  -5  -7  -1    8.10    1.80
  -5  -7  -1    9.50    2.00
   5  -7   1   11.00    1.10
  -5  -7  -1   10.30    1.30
   5  -7   1   10.50    2.20
   5   7   1   10.40    1.00
   5   7   1    9.00    2.10
  -5   7  -1   11.30    1.80
   5   7   1   10.20    1.80
  -5   7  -1    8.00    2.10
  -7  -7  -1   -0.40    1.40
   7  -7   1   -1.10    1.30
  -7  -7  -1   -1.10    1.40
  -7  -7  -1    0.00    0.70
   7  -7   1    1.00    0.80
   7  -7   1    0.30    0.90
  -7  -7  -1   -0.70    0.70
  -7   7  -1   -2.00    1.30
   7   7   1   -0.50    1.80
   7   7   1   -0.80    0.60
   7   7   1   -0.90    1.50
  -7   7  -1   -0.80    1.00
  -9  -7  -1    4.80    1.90
   9  -7   1    7.50    2.10
  -9  -7  -1    7.90    1.20
  -9  -7  -1    6.20    1.20
   9  -7   1    6.70    1.10
   9  -7   1    5.20    1.30
  -9  -7  -1    7.30    1.00
  -9   7  -1    7.20    2.10
   9   7   1    7.80    2.20
   9   7   1    6.20    2.30
   9   7   1    6.00    1.00
  -9   7  -1    5.70    1.50
  11  -7   1   31.50    4.00
  11  -7   1   30.50    1.90
 -11  -7  -1   31.90    1.80
 -11  -7  -1   25.30    2.00
  11  -7   1   27.70    2.80
  11  -7   1   29.00    2.40
 -11  -7  -1   29.80    1.80
 -11  -7  -1   27.90    2.80
 -11   7  -1   32.10    4.10
  11   7   1   33.20    3.10
  11   7   1   33.30    2.00
 -11   7  -1   32.20    2.90
  11   7   1   29.30    1.80
  13  -7   1    1.10    1.40
  13  -7   1   -1.30    2.20
 -13  -7  -1   -1.40    1.80
 -13  -7  -1   -1.50    1.30
  13  -7   1   -1.90    0.90
 -13  -7  -1   -0.70    1.00
 -13  -7  -1   -1.70    0.90
  13  -7   1    0.00    1.20
 -13   7  -1    0.50    2.40
 -13   7  -1   -0.50    1.30
  13   7   1    0.50    1.00
  13   7   1    2.50    2.30
  13   7   1    0.30    1.00
 -15  -7  -1   10.20    1.50
 -15  -7  -1   10.70    1.80
  15  -7   1   13.60    1.60
 -15  -7  -1   15.90    2.80
 -15  -7  -1   13.60    2.00
  15  -7   1   14.30    2.10
  15  -7   1   15.60    3.50
  15  -7   1   13.00    2.30
  15   7   1   12.50    1.60
 -15   7  -1   14.10    2.30
  15   7   1   14.60    3.00
 -15   7  -1   13.10    3.50
  15   7   1   13.30    1.70
 -17  -7  -1   26.30    2.80
  17  -7   1   21.60    2.80
 -17  -7  -1   26.50    3.60
 -17  -7  -1   24.30    2.20
  17  -7   1   22.40    2.10
  17  -7   1   23.70    3.00
 -17  -7  -1   22.50    2.50
  17  -7   1   25.50    4.40
 -17   7  -1   24.80    4.40
  17   7   1   22.60    3.40
 -17   7  -1   25.40    3.10
  17   7   1   24.80    2.30
  17   7   1   23.20    2.30
 -17   7  -1   21.60    3.00
 -17   7  -1   23.70    2.10
 -19  -7  -1   -0.60    1.20
 -19  -7  -1    1.70    2.10
 -19  -7  -1    0.00    1.30
  19  -7   1   -0.70    2.50
  19  -7   1   -3.20    1.80
  19   7   1   -0.90    2.50
  19   7   1    0.90    1.30
  19   7   1   -2.20    1.30
 -19   7  -1   -1.10    1.70
 -19   7  -1    0.40    2.50
 -21  -7  -1    6.00    2.20
 -21  -7  -1    5.40    1.60
 -21  -7  -1   11.60    2.60
 -21   7  -1    7.60    3.50
  21   7   1    6.00    1.70
  21   7   1    5.50    2.90
 -23  -7  -1    0.70    2.20
 -23  -7  -1    0.20    1.60
  23   7   1    0.50    2.10
  23   7   1    2.80    1.70
 -25  -7  -1   -1.00    1.70
 -25  -7  -1   -2.50    2.20
  25   7   1    0.80    1.70
  25   7   1   -1.40    2.90
 -24  -8   1    3.20    2.50
 -24  -8   1   -0.90    1.60
  24   8  -1   -3.10    2.80
 -22  -8   1   -1.10    1.50
 -22  -8   1   -1.20    1.50
  22  -8  -1    1.30    3.20
 -22   8   1   -0.70    2.50
 -22   8   1    3.30    3.00
  22   8  -1   -3.40    2.60
 -20  -8   1    3.40    2.10
  20  -8  -1   -1.10    2.80
 -20  -8   1    0.20    1.50
 -20  -8   1    1.80    2.10
  20  -8  -1    1.90    2.00
 -20   8   1    0.80    2.20
  20   8  -1    1.20    2.00
 -20   8   1    2.10    2.30
 -18  -8   1    6.70    2.40
 -18  -8   1    6.10    1.70
  18  -8  -1    5.80    2.10
 -18  -8   1    4.40    1.50
  18  -8  -1    2.90    3.20
 -18   8   1    5.00    3.30
  18   8  -1    4.70    2.70
 -18   8   1    3.80    2.20
 -16  -8   1    3.90    2.20
  16  -8  -1    3.90    1.90
 -16  -8   1    4.00    1.50
  16  -8  -1    3.70    1.80
  16  -8  -1    3.60    3.20
 -16  -8   1    2.90    1.30
  16   8  -1    3.30    2.60
 -16   8   1    5.00    2.10
 -16   8   1    2.90    2.60
  14  -8  -1    1.60    1.70
  14  -8  -1    3.60    3.00
 -14  -8   1    1.70    2.00
  14  -8  -1    1.50    1.70
 -14  -8   1    0.30    1.60
 -14   8   1    2.10    1.80
 -14   8   1   -2.20    2.70
  14   8  -1    0.60    2.40
 -12  -8   1   20.00    2.10
  12  -8  -1   18.20    2.60
 -12  -8   1   21.80    3.10
  12  -8  -1   20.20    3.80
 -12   8   1   22.50    3.10
 -12   8   1   17.60    3.70
  12   8  -1   20.50    3.10
  10  -8  -1   23.60    3.40
 -10  -8   1   23.50    3.10
  10  -8  -1   22.60    2.70
 -10  -8   1   23.00    2.00
 -10   8   1   27.00    3.10
  10   8  -1   24.30    3.90
 -10   8   1   22.70    3.40
  10   8  -1   21.60    3.10
  -8  -8   1   17.60    2.60
  -8  -8   1   15.40    1.90
   8  -8  -1   17.00    1.40
   8  -8  -1   19.10    2.50
   8  -8  -1   20.40    3.60
   8   8  -1   18.70    3.20
   8   8  -1   14.90    2.60
  -8   8   1   23.30    4.00
  -8   8   1   17.30    2.40
  -6  -8   1    0.70    1.60
   6  -8  -1    1.60    1.20
   6  -8  -1    2.10    0.80
  -6  -8   1    2.40    1.20
   6  -8  -1    1.00    1.80
   6   8  -1    1.40    2.30
  -6   8   1   -0.60    2.30
   6   8  -1   -0.30    1.40
  -6   8   1    2.60    1.60
  -4  -8   1   49.30    4.00
   4  -8  -1   42.00    4.20
  -4  -8   1   43.30    2.90
   4  -8  -1   43.40    2.00
   4  -8  -1   45.00    3.10
  -4  -8   1   47.80    2.50
  -4   8   1   46.20    3.50
   4   8  -1   46.10    3.50
  -4   8   1   44.90    4.40
   4   8  -1   45.30    4.20
   2  -8  -1   46.50    2.10
  -2  -8   1   46.00    4.00
  -2  -8   1   43.00    2.30
  -2  -8   1   40.10    2.80
   2  -8  -1   44.20    3.60
   2  -8  -1   44.30    3.10
  -2   8   1   44.00    3.70
  -2   8   1   42.30    3.40
   2   8  -1   44.30    4.20
   2   8  -1   43.60    3.30
   0  -8   1   -1.50    1.30
   0  -8   1   -0.50    0.80
   0  -8  -1    0.80    0.90
   0  -8   1   -0.30    1.00
   0  -8  -1   -0.50    1.30
   0   8   1   -1.60    1.30
   0   8   1   -3.00    1.50
   0   8  -1    0.50    1.50
   0   8  -1   -0.30    1.50
   2  -8   1    6.10    1.10
  -2  -8  -1    3.90    1.30
   2  -8   1    4.90    1.60
   2  -8   1    5.10    1.90
  -2  -8  -1    5.90    1.10
  -2  -8  -1    6.40    2.20
   2   8   1    4.40    2.10
  -2   8  -1    5.40    1.60
  -2   8  -1    4.70    2.00
   2   8   1    7.00    2.30
   4  -8   1    7.80    1.10
   4  -8   1    5.90    1.40
  -4  -8  -1    6.40    1.20
   4  -8   1    6.00    2.10
  -4  -8  -1    6.90    1.60
  -4  -8  -1    7.70    2.20
   4   8   1    7.00    1.80
  -4   8  -1    3.50    2.50
   4   8   1    7.50    2.30
  -4   8  -1    8.30    1.90
   6  -8   1    1.60    1.50
   6  -8   1    1.00    0.90
  -6  -8  -1    0.10    1.70
  -6  -8  -1    0.30    1.70
  -6  -8  -1    1.90    0.90
   6  -8   1    1.00    1.80
   6   8   1   -1.40    2.00
  -6   8  -1    0.50    1.80
  -6   8  -1    3.10    1.60
   6   8   1    1.40    1.90
   8  -8   1    1.90    1.00
  -8  -8  -1   -0.50    1.80
   8  -8   1    2.70    2.00
   8  -8   1    2.30    1.70
  -8  -8  -1    1.00    1.20
  -8   8  -1    2.10    1.50
   8   8   1    1.80    1.70
   8   8   1    2.70    2.00
  -8   8  -1    2.70    2.00
 -10  -8  -1    9.60    2.40
 -10  -8  -1    7.60    1.60
  10  -8   1   11.20    1.40
  10  -8   1   10.30    1.80
  10  -8   1   11.10    3.20
 -10   8  -1   11.00    2.00
 -10   8  -1   12.00    3.30
  10   8   1    7.40    2.60
 -12  -8  -1   11.90    2.60
  12  -8   1   10.80    2.20
  12  -8   1   15.20    3.10
 -12  -8  -1   10.50    1.90
  12  -8   1   13.90    1.50
 -12   8  -1   13.20    3.00
  12   8   1   12.70    2.50
 -12   8  -1   12.90    2.30
 -14  -8  -1   25.10    3.10
  14  -8   1   24.40    4.60
  14  -8   1   27.30    2.10
  14  -8   1   24.80    3.10
 -14  -8  -1   25.20    2.30
 -14   8  -1   22.60    3.90
  14   8   1   29.80    4.30
 -14   8  -1   21.40    3.20
  16  -8   1    4.00    2.00
  16  -8   1    2.90    2.40
 -16  -8  -1    2.40    1.70
 -16  -8  -1    4.90    2.30
 -16   8  -1    3.10    2.50
  16   8   1    4.20    2.20
 -18  -8  -1    4.60    2.40
 -18  -8  -1    0.70    1.40
  18  -8   1   -1.50    2.00
  18  -8   1    1.90    3.00
  18   8   1    1.70    2.10
 -18   8  -1    1.90    3.10
 -18   8  -1    1.30    2.00
  20  -8   1   -3.00    2.60
 -20  -8  -1    1.50    2.10
 -20  -8  -1    5.10    2.40
  20  -8   1   -0.20    3.00
 -20   8  -1    0.40    2.90
  20   8   1    0.40    2.80
 -20   8  -1    2.50    2.20
 -22  -8  -1   -0.10    2.20
 -22  -8  -1    3.50    2.30
  22   8   1    1.60    2.30
 -24  -8  -1   -3.00    2.10
  24   8   1   -3.20    3.00
  23  -9  -1    1.40    3.90
 -23  -9   1    2.10    2.50
 -23   9   1    0.90    2.70
  23   9  -1    0.40    3.00
  21  -9  -1    0.10    2.70
 -21  -9   1    2.60    2.40
  21   9  -1   -1.70    2.80
 -21   9   1    0.80    3.40
  19  -9  -1    5.60    3.80
 -19  -9   1    5.20    2.40
 -19  -9   1    4.20    2.20
 -19   9   1    4.00    3.70
  19   9  -1    3.50    2.80
  17  -9  -1   17.30    2.80
 -17  -9   1   11.00    2.00
  17  -9  -1   12.20    3.00
  17  -9  -1   21.30    4.60
 -17  -9   1   25.50    3.70
  17   9  -1   19.60    3.50
 -17   9   1   14.10    2.90
 -17   9   1   17.20    3.90
 -15  -9   1   39.40    4.00
  15  -9  -1   44.20    5.70
  15  -9  -1   36.40    3.40
 -15  -9   1   36.20    3.30
 -15   9   1   34.70    3.90
 -15   9   1   44.50    5.80
  15   9  -1   38.90    4.50
  13  -9  -1    1.50    3.20
  13  -9  -1    2.10    1.90
 -13  -9   1    0.90    1.70
 -13  -9   1    5.20    2.30
 -13   9   1    3.10    3.20
  13   9  -1    1.50    2.50
 -13   9   1    0.70    1.80
  11  -9  -1   31.60    3.10
 -11  -9   1   24.80    2.90
  11  -9  -1   37.40    5.20
 -11  -9   1   30.00    2.80
 -11   9   1   29.00    3.50
  11   9  -1   33.20    4.20
 -11   9   1   34.10    5.10
  -9  -9   1   99.39    5.20
  -9  -9   1   90.09    3.80
   9  -9  -1   94.19    6.00
   9  -9  -1   88.79    4.30
   9   9  -1  101.29    5.40
  -9   9   1   93.89    6.20
  -9   9   1   94.49    5.10
   9   9  -1   96.79    6.10
   7  -9  -1    2.30    2.80
  -7  -9   1    2.10    1.40
   7  -9  -1    4.30    1.90
  -7  -9   1    3.80    2.10
   7   9  -1    2.00    2.80
  -7   9   1    2.80    2.00
  -7   9   1    3.00    2.30
   7   9  -1   -0.30    2.20
   5  -9  -1  232.08    9.80
   5  -9  -1  217.98    6.40
   5  -9  -1  242.68    8.10
  -5  -9   1  228.78    6.90
  -5  -9   1  249.28    8.40
  -5   9   1  246.48    8.50
   5   9  -1  243.28    9.60
  -5   9   1  218.78    9.60
   5   9  -1  224.08    8.20
   3  -9  -1  447.26   11.40
  -3  -9   1  462.55   11.80
   3  -9  -1  483.85   13.20
  -3  -9   1  429.16   12.90
  -3  -9   1  466.55   14.30
   3  -9  -1  434.26   14.40
  -3   9   1  458.65   13.30
   3   9  -1  447.56   13.00
  -3   9   1  436.86   14.70
   3   9  -1  476.55   14.90
   1  -9  -1    9.50    3.00
   1  -9  -1   11.10    1.40
  -1  -9   1   10.20    2.60
  -1  -9   1   12.40    1.60
  -1  -9   1   11.50    2.30
   1  -9  -1   13.10    2.30
   1   9  -1    7.50    2.60
  -1   9   1    7.20    2.60
   1   9  -1   10.00    2.80
  -1   9   1   11.70    3.30
   1  -9   1  213.98    7.50
  -1  -9  -1  211.48    7.50
  -1  -9  -1  207.88    8.60
   1  -9   1  199.68    8.40
   1  -9   1  215.58    6.20
  -1  -9  -1  205.08    6.00
  -1   9  -1  209.68    7.40
  -1   9  -1  197.18    8.70
   1   9   1  207.98    7.80
   1   9   1  192.78    8.40
   3  -9   1  108.09    6.70
  -3  -9  -1  110.89    5.30
  -3  -9  -1  112.19    4.00
   3  -9   1  123.29    5.30
   3  -9   1  113.49    4.00
  -3  -9  -1  120.69    6.30
  -3   9  -1  109.99    5.10
   3   9   1  113.89    5.80
  -3   9  -1  109.99    7.00
   3   9   1  111.59    6.50
  -5  -9  -1   24.60    2.70
   5  -9   1   24.10    3.60
  -5  -9  -1   26.50    3.70
  -5  -9  -1   24.30    2.20
   5  -9   1   26.30    2.00
   5  -9   1   22.80    2.50
   5   9   1   22.50    3.30
   5   9   1   27.30    3.90
  -5   9  -1   27.00    3.80
  -5   9  -1   30.80    3.10
  -7  -9  -1    5.90    1.50
   7  -9   1    6.70    2.50
  -7  -9  -1    6.40    2.50
   7  -9   1    7.00    1.30
   7  -9   1    8.60    1.80
  -7  -9  -1    6.30    1.90
  -7   9  -1    8.80    2.00
   7   9   1    8.60    2.70
  -7   9  -1    6.70    2.60
   7   9   1    7.10    2.70
   9  -9   1   -3.20    1.60
   9  -9   1   -0.40    2.00
  -9  -9  -1   -3.10    1.80
   9  -9   1    0.70    1.00
  -9  -9  -1   -2.30    1.30
  -9   9  -1    1.20    2.20
   9   9   1   -2.00    2.30
  -9   9  -1   -2.00    1.50
 -11  -9  -1   15.90    3.00
  11  -9   1   17.20    2.40
 -11  -9  -1   17.50    2.20
  11  -9   1   14.00    1.70
  11  -9   1   20.00    4.30
 -11   9  -1   16.20    4.20
  11   9   1   16.50    2.80
 -13  -9  -1   12.80    2.90
 -13  -9  -1    9.30    2.00
  13  -9   1    9.80    3.80
  13  -9   1   10.80    2.40
  13   9   1    5.60    2.90
 -13   9  -1   10.00    3.90
 -15  -9  -1    8.00    2.00
 -15  -9  -1   13.50    3.10
  15  -9   1   11.20    4.00
  15  -9   1    9.50    2.40
  15   9   1    7.60    2.50
 -15   9  -1    8.90    3.90
  17  -9   1   32.10    3.60
  17  -9   1   34.40    5.60
 -17  -9  -1   38.80    4.30
 -17  -9  -1   36.00    3.40
  17   9   1   24.60    3.50
 -17   9  -1   35.40    5.70
  19  -9   1    5.90    2.50
 -19  -9  -1   13.20    3.10
  19  -9   1    7.40    3.90
 -19  -9  -1    5.80    2.30
 -19   9  -1    5.80    3.20
 -19   9  -1   14.60    2.80
  19   9   1    4.80    3.20
 -21  -9  -1    0.00    1.70
  21  -9   1    1.10    3.70
 -21  -9  -1    3.60    2.40
 -21   9  -1    0.50    3.60
  21   9   1   -1.10    2.30
 -23  -9  -1   -0.10    2.30
  23   9   1   -2.60    3.10
 -22 -10   1    2.90    2.50
  22 -10  -1    0.80    3.20
  22  10  -1    0.30    2.40
 -22  10   1    1.50    4.10
  20 -10  -1   -1.10    3.90
 -20 -10   1   -0.80    2.20
 -20 -10   1    4.60    2.60
  20  10  -1   -3.50    2.80
 -20  10   1   -1.20    3.80
 -18 -10   1    0.20    2.00
 -18 -10   1    5.00    2.50
  18 -10  -1    0.10    3.90
 -18  10   1    1.30    3.00
  18  10  -1   -0.20    2.90
 -16 -10   1   -0.10    1.90
 -16 -10   1    7.50    2.60
  16 -10  -1    2.30    2.10
  16 -10  -1    3.60    3.90
 -16  10   1    7.40    4.00
  16  10  -1    0.30    2.10
 -14 -10   1    6.60    2.60
  14 -10  -1    2.80    2.00
 -14 -10   1    4.90    2.00
  14 -10  -1    7.80    4.10
 -14  10   1    4.70    3.90
  14  10  -1    2.00    2.80
  12 -10  -1    6.70    3.80
  12 -10  -1    3.80    2.00
 -12 -10   1    2.90    2.30
 -12 -10   1    3.20    1.70
  12  10  -1   -0.40    2.60
 -12  10   1    1.20    2.10
 -12  10   1    1.50    3.40
 -10 -10   1   15.00    2.60
  10 -10  -1   16.20    4.10
 -10 -10   1   12.10    2.00
  10 -10  -1   20.20    3.00
 -10  10   1   12.70    3.50
 -10  10   1   12.90    2.70
  10  10  -1   14.30    3.10
   8 -10  -1   37.40    5.20
  -8 -10   1   35.90    3.80
  -8 -10   1   34.30    2.80
   8 -10  -1   37.90    3.50
  -8  10   1   35.70    5.40
   8  10  -1   31.00    4.20
  -8  10   1   35.00    3.90
   8  10  -1   28.60    4.80
  -6 -10   1    0.20    2.00
  -6 -10   1    3.70    1.50
   6 -10  -1    2.20    1.50
   6 -10  -1    1.20    2.20
   6  10  -1    2.20    3.00
  -6  10   1    2.70    3.10
   6  10  -1   -0.10    2.30
  -6  10   1    0.70    2.10
  -4 -10   1   11.40    3.30
   4 -10  -1   14.50    3.70
   4 -10  -1   11.60    2.10
  -4 -10   1   12.90    1.80
  -4 -10   1   10.20    2.60
  -4  10   1   11.10    3.60
   4  10  -1    9.70    2.70
   4  10  -1   10.50    3.40
  -4  10   1   10.40    2.70
   2 -10  -1    0.80    1.10
  -2 -10   1    0.10    2.20
  -2 -10   1    2.70    2.10
   2 -10  -1    3.30    3.00
   2 -10  -1    2.10    1.50
  -2 -10   1    3.20    1.40
   2  10  -1   -0.90    2.90
  -2  10   1    0.00    2.30
  -2  10   1    1.80    3.00
   2  10  -1   -2.10    2.10
   0 -10  -1    3.80    3.00
   0 -10  -1    5.10    1.30
   0 -10  -1    3.20    2.10
   0 -10   1    8.90    1.50
   0 -10   1    5.40    2.50
   0 -10   1    5.00    1.80
   0  10  -1    1.90    2.30
   0  10  -1    3.20    2.20
   0  10   1    4.30    3.10
   0  10   1    4.40    2.50
   2 -10   1   10.20    1.60
  -2 -10  -1   11.50    3.30
   2 -10   1   11.10    3.50
  -2 -10  -1    8.60    2.40
   2 -10   1   10.00    2.00
  -2 -10  -1   12.60    1.60
   2  10   1    8.70    2.70
  -2  10  -1   10.80    2.50
   2  10   1   11.10    3.40
  -2  10  -1   12.60    3.70
  -4 -10  -1   -2.00    2.30
   4 -10   1   -0.60    2.10
  -4 -10  -1   -0.50    1.90
   4 -10   1    1.40    1.90
   4 -10   1    0.60    1.10
  -4 -10  -1    0.10    1.20
   4  10   1   -0.20    1.90
  -4  10  -1   -0.70    2.10
   4  10   1   -1.60    2.30
  -4  10  -1   -1.50    1.80
  -6 -10  -1   -3.40    2.30
   6 -10   1   -0.10    1.80
   6 -10   1   -1.00    1.00
  -6 -10  -1   -2.10    1.10
   6 -10   1   -1.10    2.80
  -6 -10  -1   -1.80    1.90
   6  10   1   -2.40    1.70
  -6  10  -1   -1.60    2.10
   6  10   1   -4.00    2.20
  -8 -10  -1   15.20    2.00
   8 -10   1   15.20    2.60
   8 -10   1   17.20    2.10
  -8 -10  -1   15.20    2.90
   8 -10   1   13.80    3.40
   8  10   1   10.90    3.10
  -8  10  -1   14.70    3.50
 -10 -10  -1    4.80    1.90
  10 -10   1    0.90    1.50
 -10 -10  -1    2.10    1.50
  10 -10   1    0.90    3.40
  10  10   1   -1.50    2.60
 -10  10  -1   -1.10    3.20
 -12 -10  -1    4.90    1.80
  12 -10   1    8.40    3.30
  12 -10   1    5.50    2.20
 -12 -10  -1    7.70    2.70
 -12  10  -1    2.50    2.80
  12  10   1    2.80    3.00
 -14 -10  -1   16.80    3.30
  14 -10   1   12.90    4.50
  14 -10   1   13.70    2.70
 -14 -10  -1   14.50    2.30
  14  10   1    8.60    3.40
 -14  10  -1   12.40    3.80
 -16 -10  -1    5.40    2.10
 -16 -10  -1    7.30    2.90
  16 -10   1    2.40    2.40
  16 -10   1    4.00    4.00
  16  10   1    0.50    3.00
 -16  10  -1    1.80    2.90
 -18 -10  -1    0.30    2.10
  18 -10   1    2.80    2.40
 -18 -10  -1    6.00    2.80
  18 -10   1    0.80    3.00
 -18  10  -1    2.40    3.90
  18  10   1    0.20    3.00
  20 -10   1    5.70    4.30
 -20 -10  -1    4.20    1.80
 -20 -10  -1   12.20    3.20
 -20  10  -1    4.00    4.20
  20  10   1    2.10    3.40
 -22 -10  -1   11.00    3.10
 -22 -10  -1    4.40    2.60
  22 -10   1    5.30    4.10
  22  10   1   -2.40    3.30
 -22  10  -1    3.10    4.30
  19 -11  -1    3.20    4.60
 -19 -11   1    7.30    2.80
 -19 -11   1    2.50    2.30
 -19  11   1    1.50    3.20
  19  11  -1   -1.30    3.10
  17 -11  -1   16.60    5.40
 -17 -11   1   11.10    2.60
 -17 -11   1   16.20    3.40
 -17  11   1    6.50    4.60
  17  11  -1    4.30    2.70
 -15 -11   1    5.70    2.20
  15 -11  -1    3.30    2.20
 -15 -11   1    7.00    2.70
  15 -11  -1   10.30    4.80
 -15  11   1    5.90    4.40
  15  11  -1    0.70    3.10
 -13 -11   1    0.50    1.80
 -13 -11   1   -0.70    1.20
  13 -11  -1   -1.70    3.80
  13 -11  -1    0.10    2.00
  13  11  -1   -1.10    2.00
 -13  11   1    0.00    3.80
  11 -11  -1    1.80    3.80
 -11 -11   1    1.20    1.70
  11 -11  -1    2.60    2.10
 -11 -11   1    3.50    2.40
 -11  11   1    2.90    3.70
  11  11  -1   -2.80    2.60
   9 -11  -1    2.30    2.90
   9 -11  -1    1.40    2.00
  -9 -11   1    1.20    1.60
  -9 -11   1    4.50    2.50
   9  11  -1    0.50    2.60
  -9  11   1    1.10    2.50
  -9  11   1    1.90    2.70
  -7 -11   1    0.30    1.60
   7 -11  -1    1.20    2.00
   7 -11  -1   -2.50    3.10
  -7 -11   1   -0.10    1.50
  -7  11   1   -2.10    2.20
   7  11  -1   -4.30    2.30
   7  11  -1   -4.70    2.90
  -7  11   1    0.50    3.30
  -5 -11   1    4.80    1.90
   5 -11  -1    4.50    3.50
   5 -11  -1    6.10    2.30
  -5 -11   1    6.40    1.70
   5  11  -1    3.60    2.60
  -5  11   1    3.50    3.40
  -5  11   1    4.00    2.50
   5  11  -1    4.50    3.40
   3 -11  -1   -1.10    3.00
  -3 -11   1    0.60    1.60
   3 -11  -1    0.10    2.10
  -3 -11   1    0.80    1.40
  -3 -11   1   -1.90    3.00
   3  11  -1   -1.60    2.20
  -3  11   1   -0.30    3.10
  -3  11   1   -1.40    2.30
   3  11  -1   -3.80    3.00
  -1 -11   1    7.70    3.50
   1 -11  -1   10.70    3.10
  -1 -11   1   12.00    1.70
   1 -11  -1   11.50    2.30
  -1 -11   1    9.10    2.20
  -1  11   1    6.70    3.60
   1  11  -1    6.50    2.60
   1  11  -1    7.80    3.60
  -1  11   1    8.70    2.90
  -1 -11  -1   43.80    4.10
   1 -11   1   49.10    4.10
   1 -11   1   45.80    5.60
   1 -11   1   49.10    2.80
  -1 -11  -1   44.70    4.50
   1  11   1   37.60    4.50
  -1  11  -1   41.00    5.70
   1  11   1   43.00    4.70
  -3 -11  -1   23.00    3.60
   3 -11   1   28.30    2.30
  -3 -11  -1   28.10    2.30
   3 -11   1   27.20    2.90
   3 -11   1   27.80    4.20
  -3 -11  -1   28.80    3.60
  -3  11  -1   27.10    4.30
   3  11   1   23.80    3.60
   3  11   1   23.60    4.30
  -5 -11  -1   -0.80    1.10
   5 -11   1   -0.90    1.90
   5 -11   1   -2.70    3.00
  -5 -11  -1   -2.50    2.60
  -5 -11  -1   -0.10    2.10
   5  11   1   -1.80    2.60
   5  11   1   -5.00    2.50
  -5  11  -1   -1.10    2.20
   7 -11   1    1.90    3.50
  -7 -11  -1    3.40    2.40
   7 -11   1    1.90    2.10
  -7 -11  -1    1.40    1.10
  -7  11  -1    1.60    2.60
   7  11   1    1.30    2.80
   7  11   1    0.40    3.60
   9 -11   1    8.70    2.50
  -9 -11  -1    9.40    2.40
   9 -11   1    6.90    3.30
  -9 -11  -1    8.90    1.80
  -9  11  -1    7.60    3.30
   9  11   1    3.40    3.00
  11 -11   1    4.60    2.30
 -11 -11  -1    6.50    2.70
  11 -11   1   -0.10    3.80
 -11 -11  -1    2.60    1.60
 -11  11  -1    1.90    3.80
  11  11   1   -0.90    2.90
 -13 -11  -1    8.80    2.10
  13 -11   1    7.30    4.40
  13 -11   1   10.10    2.70
 -13 -11  -1   11.20    3.10
 -13  11  -1   10.60    4.70
  13  11   1    3.90    3.20
 -15 -11  -1   43.80    4.70
 -15 -11  -1   26.10    2.70
  15 -11   1   32.90    4.00
  15 -11   1   31.40    6.20
 -15  11  -1   32.70    6.40
  15  11   1   21.20    4.20
  17 -11   1    1.00    2.60
 -17 -11  -1    6.70    2.40
 -17 -11  -1    5.70    2.30
  17 -11   1    3.80    4.60
 -17  11  -1    1.90    4.40
  17  11   1    0.20    3.40
 -19 -11  -1    2.60    1.70
 -19 -11  -1   10.00    3.20
  19 -11   1    2.80    4.70
  19  11   1   -3.40    3.30
 -19  11  -1    1.90    4.50
 -16 -12   1    4.30    2.80
  16 -12  -1    2.10    3.60
 -16 -12   1    1.50    2.10
  16  12  -1   -4.50    3.10
 -16  12   1    0.90    4.40
 -14 -12   1    1.60    2.00
  14 -12  -1    0.70    2.40
 -14 -12   1    3.00    2.90
  14 -12  -1    1.30    3.50
 -14  12   1   -0.80    3.10
  14  12  -1   -3.00    3.00
  12 -12  -1   -1.10    3.20
 -12 -12   1    1.20    1.90
  12 -12  -1    3.40    2.50
 -12 -12   1    3.40    2.70
 -12  12   1   -0.50    4.10
  12  12  -1   -4.40    2.90
  10 -12  -1    1.00    4.30
  10 -12  -1    3.90    2.40
 -10 -12   1    3.90    1.90
 -10 -12   1    6.30    2.80
  10  12  -1   -3.50    2.70
 -10  12   1    1.60    4.10
  -8 -12   1    1.20    1.60
   8 -12  -1    3.10    2.30
   8 -12  -1    0.70    2.90
  -8 -12   1    2.90    2.40
   8  12  -1   -3.40    2.60
  -8  12   1    0.70    2.70
  -6 -12   1    1.10    2.30
   6 -12  -1    1.80    2.20
   6 -12  -1    0.40    3.60
  -6 -12   1    1.80    1.20
  -6  12   1    2.90    2.80
   6  12  -1   -3.80    2.50
   6  12  -1   -2.60    3.30
   4 -12  -1    3.00    3.60
  -4 -12   1    2.60    2.40
   4 -12  -1    4.40    1.90
  -4 -12   1    5.00    1.60
  -4  12   1    4.30    2.90
  -4  12   1    1.40    2.80
   4  12  -1    0.20    3.50
  -2 -12   1    4.30    2.40
  -2 -12   1    6.00    1.60
   2 -12  -1    3.30    2.80
   2 -12  -1    3.20    2.30
  -2 -12   1   -1.70    3.40
   2  12  -1   -2.00    3.30
  -2  12   1   -0.90    2.60
  -2  12   1    3.60    3.50
   0 -12   1   -1.90    3.30
   0 -12  -1    0.60    2.20
   0 -12  -1   -2.00    3.00
   0 -12   1   -1.30    2.10
   0 -12   1    0.10    1.30
   0  12   1   -2.40    3.00
   0  12  -1   -1.90    3.30
   0  12   1   -3.90    2.50
   2 -12   1   -0.90    2.60
   2 -12   1    0.30    2.00
  -2 -12  -1    0.40    1.60
  -2 -12  -1   -0.50    3.10
   2  12   1   -1.20    3.10
   2  12   1   -5.40    2.40
  -2  12  -1    0.90    2.60
   4 -12   1    0.30    1.60
   4 -12   1   -2.30    3.50
  -4 -12  -1   -4.70    2.90
  -4 -12  -1   -0.10    1.60
   4  12   1   -5.90    2.50
  -4  12  -1   -2.40    3.30
   4  12   1   -1.80    3.00
   6 -12   1    5.60    4.20
  -6 -12  -1    6.50    1.60
   6 -12   1    7.00    2.40
  -6 -12  -1    9.20    2.80
   6  12   1    0.20    3.90
  -6  12  -1    7.80    4.20
   6  12   1    0.90    3.00
  -8 -12  -1   13.10    2.00
   8 -12   1   11.90    3.90
  -8 -12  -1   12.40    2.70
   8 -12   1   14.50    2.90
  -8  12  -1   12.30    3.90
   8  12   1    6.40    3.30
 -10 -12  -1    4.30    1.50
 -10 -12  -1    6.80    2.90
  10 -12   1    1.20    4.30
  10 -12   1    4.60    2.00
 -10  12  -1    5.80    4.40
  10  12   1    0.60    3.20
  12 -12   1   -1.60    3.10
  12 -12   1    1.70    1.90
 -12 -12  -1    3.80    2.90
 -12 -12  -1    0.20    1.30
  12  12   1   -4.00    2.20
 -12  12  -1    0.00    3.20
 -14 -12  -1    6.10    2.20
  14 -12   1    2.30    2.60
 -14 -12  -1    8.70    3.20
  14 -12   1    6.30    5.00
  14  12   1   -3.70    3.30
 -14  12  -1    1.30    3.30
  16 -12   1   -1.80    4.60
  16 -12   1   -0.90    2.50
 -16 -12  -1    8.40    3.10
 -16 -12  -1    1.70    2.00
 -16  12  -1    0.20    3.50
  16  12   1   -3.00    3.30
  13 -13  -1    1.10    4.90
 -13 -13   1    0.50    2.00
  13 -13  -1    1.70    2.60
 -13 -13   1    1.70    2.80
 -13  13   1    2.10    3.50
 -11 -13   1    1.40    2.70
  11 -13  -1   -1.00    3.40
  11 -13  -1    1.70    2.50
 -11 -13   1    1.90    2.00
 -11  13   1   -0.30    4.30
  11  13  -1   -5.70    4.00
   9 -13  -1    3.00    2.50
  -9 -13   1    0.20    2.60
   9 -13  -1   -1.80    4.60
  -9 -13   1    1.40    1.90
  -9  13   1   -3.40    3.90
   7 -13  -1   -1.80    4.00
  -7 -13   1    0.10    2.60
  -7 -13   1    1.80    1.60
   7 -13  -1   -0.20    1.80
  -7  13   1    1.50    4.10
  -5 -13   1    9.00    2.00
   5 -13  -1    6.00    2.70
  -5 -13   1    9.70    3.00
   5 -13  -1    8.10    3.80
   5  13  -1    4.40    4.30
  -5  13   1    9.00    3.70
  -3 -13   1    5.40    2.80
   3 -13  -1    5.60    2.10
  -3 -13   1    6.50    2.30
   3 -13  -1    4.70    3.30
  -3  13   1    4.30    4.10
   3  13  -1    0.70    4.00
   1 -13  -1   -2.10    3.60
  -1 -13   1    2.10    2.30
   1 -13  -1    3.50    2.40
  -1  13   1   -1.90    3.60
   1  13  -1   -2.90    3.80
  -1 -13  -1   -1.50    2.60
   1 -13   1    2.40    2.40
   1 -13   1   -1.80    2.80
  -1 -13  -1    2.80    2.50
  -1  13  -1   -2.10    2.70
   1  13   1   -4.20    2.90
   1  13   1   -3.70    3.30
  -3 -13  -1    1.20    1.90
   3 -13   1    0.70    1.80
   3 -13   1   -3.60    4.00
  -3 -13  -1   -2.60    2.50
  -3  13  -1   -4.00    3.60
   3  13   1   -6.40    2.90
   3  13   1   -2.30    2.50
   5 -13   1    3.80    2.40
   5 -13   1   -0.80    4.30
  -5 -13  -1    3.70    2.20
   5  13   1   -3.30    4.30
  -5  13  -1   -1.70    4.00
  -7 -13  -1    2.50    2.70
   7 -13   1   -0.60    4.50
   7 -13   1    3.80    2.60
   7  13   1   -7.20    2.80
  -9 -13  -1    4.00    2.90
   9 -13   1    2.00    3.60
   9 -13   1    1.00    2.50
   9  13   1   -4.90    3.10
  -9  13  -1   -1.20    4.30
  11 -13   1   -2.50    4.90
 -11 -13  -1    2.70    2.20
  11 -13   1    1.00    2.60
 -11 -13  -1    2.60    2.00
  11  13   1   -7.90    3.10
 -11  13  -1   -4.80    4.30
  13 -13   1   -3.00    5.00
 -13 -13  -1    3.20    2.40
 -13 -13  -1    1.50    1.90
  13 -13   1   -0.80    2.60
  13  13   1   -6.50    3.30
 -13  13  -1   -0.30    4.80
   8 -14  -1    3.80    5.30
  -8 -14   1   10.10    3.20
  -8  14   1    2.30    4.60
  -6 -14   1    2.10    2.10
   6 -14  -1    6.10    2.90
   6 -14  -1    0.40    4.90
  -6  14   1    0.00    4.50
   4 -14  -1   17.50    5.60
   4 -14  -1   17.40    3.40
  -4 -14   1   19.10    3.80
  -4  14   1   15.00    5.40
   4  14  -1   12.30    5.30
   2 -14  -1    6.90    2.90
   2 -14  -1    2.10    4.50
  -2 -14   1    6.30    2.90
   2  14  -1   -0.70    4.50
  -2  14   1   -1.90    4.30
   0 -14   1   23.60    3.40
   0 -14  -1   22.50    5.50
   0 -14  -1   35.90    4.50
   0  14   1   20.20    4.80
   0  14  -1   15.10    5.50
   2 -14   1   11.90    5.40
   2 -14   1   22.80    3.30
  -2 -14  -1   21.50    3.80
  -2 -14  -1   15.10    5.20
   2  14   1   18.40    5.50
  -2  14  -1   19.20    5.70
  -4 -14  -1    6.10    3.00
   4 -14   1    1.80    2.00
   4 -14   1   -3.50    4.60
  -4  14  -1   -3.60    4.40
   4  14   1    0.80    6.70
   6 -14   1    9.00    5.60
  -6 -14  -1   10.30    3.30
   6 -14   1   11.90    3.20
  -6  14  -1    6.60    5.20
   8 -14   1    6.80    4.40
   8  14   1    0.10    3.80
  -8  14  -1    7.10    4.30
 -30   0   2   -1.90    1.40
 -30   0   2   -2.40    1.20
  30   0  -2    1.80    1.80
  30   0  -2   -2.00    2.10
 -30   0   2   -2.40    1.80
  30   0  -2   -1.10    1.50
 -28   0   2    3.50    1.50
  28   0  -2   -0.20    2.00
  28   0  -2    5.30    1.70
 -28   0   2    1.00    1.90
  28   0  -2    5.40    2.60
 -28   0   2    2.40    1.90
 -26   0   2   -1.80    1.60
 -26   0   2    1.70    1.70
 -26   0   2    2.60    1.30
  26   0  -2    2.80    1.50
  26   0  -2    2.50    1.90
  26   0  -2    2.40    2.30
  24   0  -2    0.60    1.10
 -24   0   2   -3.00    1.50
  24   0  -2   -1.40    1.90
 -24   0   2   -0.60    1.00
  24   0  -2    2.00    1.70
 -24   0   2    0.30    1.10
  24   0  -2   -0.10    1.00
 -24   0   2   -1.70    1.40
  22   0  -2    7.20    1.80
 -22   0   2    5.10    1.30
  22   0  -2    9.30    2.30
 -22   0   2    7.70    1.70
  22   0  -2    6.90    1.40
  22   0  -2   10.80    1.80
 -22   0   2    8.60    1.70
 -22   0   2    4.80    1.60
 -20   0   2   11.80    1.50
  20   0  -2   12.30    1.80
 -20   0   2   11.70    1.80
 -20   0   2   10.60    1.80
 -20   0   2   13.70    1.80
  20   0  -2   14.20    1.90
  20   0  -2   12.70    2.30
  20   0  -2    9.40    1.50
 -18   0   2   29.50    2.00
 -18   0   2   31.20    2.10
  18   0  -2   33.10    2.20
  18   0  -2   28.60    2.00
 -18   0   2   31.10    2.20
  18   0  -2   29.10    2.30
 -18   0   2   30.60    2.30
  18   0  -2   32.90    2.90
 -16   0   2    1.80    0.80
  16   0  -2    0.60    0.70
 -16   0   2    2.50    1.10
 -16   0   2    1.90    0.80
 -16   0   2    0.60    0.90
  16   0  -2    2.10    1.40
  16   0  -2    2.20    1.30
  16   0  -2    0.50    1.00
  16   0  -2    0.90    1.00
 -16   0   2    3.40    1.30
  14   0  -2  198.88    5.70
  14   0  -2  202.88    5.80
 -14   0   2  194.68    5.70
 -14   0   2  203.58    5.80
  14   0  -2  195.58    6.50
  14   0  -2  189.48    5.60
 -14   0   2  206.48    5.70
 -14   0   2  203.58    5.60
  14   0  -2  190.18    6.10
  12   0  -2   55.09    2.20
  12   0  -2   50.19    2.20
 -12   0   2   54.69    2.20
 -12   0   2   56.59    2.10
  12   0  -2   53.49    2.60
 -12   0   2   53.99    2.20
 -12   0   2   56.09    2.20
  12   0  -2   51.49    2.20
  12   0  -2   52.89    3.00
  10   0  -2    1.50    0.60
 -10   0   2    2.60    0.60
 -10   0   2    2.30    0.50
 -10   0   2    1.40    0.60
  10   0  -2    1.80    1.00
  10   0  -2    0.40    0.60
  10   0  -2    1.50    0.50
  10   0  -2    1.10    0.80
 -10   0   2    2.70    0.70
  -8   0   2  885.81   20.30
  -8   0   2  881.01   20.50
   8   0  -2  866.41   21.30
   8   0  -2  889.41   20.50
  -8   0   2  904.11   20.30
   8   0  -2  871.81   20.50
  -8   0   2  882.91   20.40
   8   0  -2  886.01   20.40
   8   0  -2  890.31   20.80
   6   0  -2 1143.39   27.00
   6   0  -2 1143.09   26.30
   6   0  -2 1135.59   26.20
  -6   0   2 1136.59   26.20
  -6   0   2 1171.18   26.30
   6   0  -2 1167.28   26.80
   6   0  -2 1164.48   26.30
   4   0  -2 3862.61   83.69
  -4   0   2 3364.76   82.99
   0   0   2   -1.80    0.10
   0   0   2   -1.90    0.10
  -4   0  -2 2643.34   64.29
   4   0   2 2887.41   66.49
   4   0   2 2812.02   64.39
  -6   0  -2  706.23   16.30
   6   0   2  695.23   16.30
   6   0   2  697.03   16.60
  -6   0  -2  698.83   16.60
  -6   0  -2  702.33   16.20
   6   0   2  710.73   16.20
   6   0   2  693.73   16.40
   6   0   2  702.73   16.20
   6   0   2  708.53   16.20
   8   0   2   50.19    1.80
   8   0   2   50.79    1.80
  -8   0  -2   51.59    1.90
  -8   0  -2   51.89    1.80
  -8   0  -2   49.99    2.00
   8   0   2   52.99    2.30
  -8   0  -2   53.59    2.30
   8   0   2   51.29    1.90
   8   0   2   50.69    2.00
   8   0   2   51.59    2.00
   8   0   2   52.89    1.80
  10   0   2 1047.60   25.50
  10   0   2 1126.49   27.00
 -10   0  -2 1073.79   26.90
  10   0   2 1089.69   25.20
 -10   0  -2 1098.59   25.20
  10   0   2 1105.29   25.40
 -10   0  -2 1073.09   25.40
 -10   0  -2 1069.49   25.70
  10   0   2 1101.99   25.30
  10   0   2 1121.79   25.20
 -12   0  -2  122.19    4.30
 -12   0  -2  115.49    3.60
 -12   0  -2  122.89    3.70
  12   0   2  116.29    3.90
  12   0   2  116.49    3.50
  12   0   2  112.09    3.60
  12   0   2  116.49    3.60
 -12   0  -2  120.59    3.60
  12   0   2  118.09    4.10
 -12   0  -2  115.19    3.90
  12   0   2  117.39    3.70
  14   0   2   42.90    2.20
 -14   0  -2   39.90    2.30
 -14   0  -2   40.70    2.30
 -14   0  -2   42.90    2.10
  14   0   2   39.50    2.50
  14   0   2   39.70    2.30
  14   0   2   41.70    2.20
 -14   0  -2   42.40    2.80
 -14   0  -2   41.30    2.10
  14   0   2   40.90    2.10
 -16   0  -2   33.90    2.10
 -16   0  -2   31.70    2.00
  16   0   2   31.70    2.60
  16   0   2   31.70    2.00
  16   0   2   33.50    2.20
 -16   0  -2   35.40    2.90
  16   0   2   35.30    2.20
 -16   0  -2   33.20    2.20
  16   0   2   33.40    2.10
 -18   0  -2   56.89    2.90
  18   0   2   55.29    3.00
  18   0   2   59.29    3.00
 -18   0  -2   56.79    3.80
 -18   0  -2   61.89    3.20
  18   0   2   56.09    3.20
 -18   0  -2   56.69    3.00
  18   0   2   57.99    2.90
  18   0   2   49.80    3.10
 -20   0  -2   21.30    2.10
  20   0   2   20.60    2.90
  20   0   2   19.40    2.00
 -20   0  -2   19.70    1.90
 -20   0  -2   25.60    2.20
  20   0   2   19.80    2.10
 -20   0  -2   22.40    3.30
  20   0   2   23.50    2.40
  20   0   2   18.80    1.90
 -22   0  -2    2.20    1.10
 -22   0  -2    3.80    1.30
 -22   0  -2    2.30    1.60
  22   0   2    3.90    1.50
  22   0   2    3.80    1.30
 -22   0  -2    5.00    2.30
  22   0   2    3.90    1.90
  22   0   2    3.70    1.20
  24   0   2   18.60    2.30
 -24   0  -2   15.10    2.10
  24   0   2   17.80    2.30
  24   0   2   20.00    2.30
 -24   0  -2   17.60    2.40
  24   0   2   18.50    2.60
 -24   0  -2   17.80    2.30
 -26   0  -2    7.40    2.20
  26   0   2   12.50    2.70
  26   0   2   10.70    1.90
 -26   0  -2   11.10    2.00
  26   0   2   10.70    2.20
 -28   0  -2   -3.90    1.90
  28   0   2   -0.40    1.60
  28   0   2    2.10    1.90
  28   0   2    2.40    1.60
 -28   0  -2   -1.40    1.20
 -30   0  -2    3.80    2.10
  30   0   2    5.50    2.70
 -30   0  -2    2.40    2.10
  30   0   2    3.00    2.30
 -30   0  -2   -0.40    1.70
  30   0   2    7.50    2.30
  29  -1  -2    1.00    2.40
 -29  -1   2   -1.20    1.80
  29  -1  -2   -1.70    2.00
 -29  -1   2   -0.30    1.90
 -29  -1   2   -2.80    1.90
  29  -1  -2   -2.40    1.90
 -29   1   2   -2.10    1.80
  29   1  -2   -0.10    1.80
  29   1  -2   -1.40    1.90
 -29   1   2   -0.80    1.90
  29   1  -2    0.10    2.10
 -29   1   2   -1.20    1.80
 -27  -1   2   -1.00    1.70
  27  -1  -2    1.60    1.90
  27  -1  -2   -1.90    1.70
  27  -1  -2    2.20    2.20
 -27  -1   2    0.10    1.70
 -27  -1   2   -4.20    1.70
 -27   1   2   -0.90    1.60
 -27   1   2   -0.10    1.70
 -27   1   2   -2.40    1.60
  27   1  -2    3.00    2.50
  27   1  -2    2.10    1.90
  27   1  -2    2.90    2.00
 -25  -1   2   -0.60    1.50
 -25  -1   2   -2.40    1.40
  25  -1  -2    1.40    1.60
 -25  -1   2    0.10    1.50
  25  -1  -2   -1.40    1.50
  25  -1  -2    0.30    1.50
 -25  -1   2   -2.40    1.60
  25  -1  -2   -2.40    1.50
  25   1  -2   -1.10    1.60
 -25   1   2   -3.40    1.40
 -25   1   2   -2.40    1.00
  25   1  -2   -0.20    1.70
  25   1  -2   -0.60    1.40
  25   1  -2    1.30    2.10
 -25   1   2    0.80    1.60
 -25   1   2    0.70    1.20
 -23  -1   2    5.30    1.60
 -23  -1   2    2.20    1.70
  23  -1  -2    3.10    1.70
  23  -1  -2    3.10    1.20
  23  -1  -2    4.50    1.70
 -23  -1   2    5.40    1.60
 -23  -1   2    4.80    1.30
  23  -1  -2    5.90    1.50
  23   1  -2    3.20    1.50
 -23   1   2    3.20    1.30
  23   1  -2    3.80    1.70
 -23   1   2    3.00    1.50
 -23   1   2    5.40    1.40
  23   1  -2    5.90    1.80
 -23   1   2    2.40    1.50
  23   1  -2    4.50    1.30
  21  -1  -2    1.60    1.80
 -21  -1   2    3.50    1.60
  21  -1  -2    1.90    1.40
 -21  -1   2    3.80    1.50
  21  -1  -2    1.00    1.00
 -21  -1   2    2.60    1.10
 -21  -1   2    1.80    1.10
  21  -1  -2    2.70    1.50
 -21   1   2    2.50    1.40
  21   1  -2    2.70    1.10
 -21   1   2    2.40    1.40
  21   1  -2    2.30    1.90
 -21   1   2    1.80    1.10
 -21   1   2    3.00    1.40
  21   1  -2    3.20    1.50
  21   1  -2    2.50    1.20
 -19  -1   2   -0.80    1.20
  19  -1  -2   -2.60    1.30
 -19  -1   2    0.40    1.20
  19  -1  -2   -1.40    1.50
  19  -1  -2   -1.90    1.10
  19  -1  -2   -2.10    1.20
 -19  -1   2   -2.20    1.10
 -19  -1   2   -0.30    1.00
  19   1  -2   -1.30    1.20
  19   1  -2   -2.30    1.20
 -19   1   2    1.00    0.90
 -19   1   2   -3.60    1.20
  19   1  -2   -2.30    1.20
  19   1  -2   -0.70    1.50
 -19   1   2    2.40    1.30
 -19   1   2   -1.60    1.10
 -17  -1   2    0.60    0.90
  17  -1  -2    0.60    1.30
  17  -1  -2    0.50    1.60
 -17  -1   2    1.20    1.10
 -17  -1   2    1.40    1.10
  17  -1  -2   -0.10    0.80
  17  -1  -2   -0.30    1.00
  17  -1  -2    1.10    0.80
 -17  -1   2    0.80    0.80
 -17  -1   2    1.00    1.10
 -17   1   2    1.10    1.00
  17   1  -2    1.10    1.40
 -17   1   2    1.10    0.80
  17   1  -2   -0.20    0.70
  17   1  -2   -0.40    1.00
 -17   1   2    0.50    1.00
 -17   1   2    1.30    1.30
  17   1  -2   -0.10    0.80
 -17   1   2    0.40    0.80
 -15  -1   2    0.80    0.60
  15  -1  -2    0.20    0.90
  15  -1  -2    0.30    0.80
 -15  -1   2    0.10    0.90
  15  -1  -2   -0.90    0.80
  15  -1  -2    1.10    0.70
 -15  -1   2    1.40    1.00
 -15  -1   2   -0.90    0.90
 -15  -1   2    0.80    1.20
  15  -1  -2   -0.70    1.20
 -15   1   2    0.70    0.70
  15   1  -2   -0.80    0.80
  15   1  -2    0.50    0.90
  15   1  -2    1.10    0.70
  15   1  -2    0.80    0.90
 -15   1   2    0.20    0.80
  15   1  -2    0.70    1.20
 -15   1   2    0.80    1.00
 -15   1   2    0.30    0.80
  13  -1  -2   38.60    2.20
  13  -1  -2   36.80    2.70
  13  -1  -2   37.60    1.80
 -13  -1   2   36.90    1.80
 -13  -1   2   37.40    1.80
 -13  -1   2   38.90    1.90
 -13  -1   2   39.60    2.20
  13  -1  -2   36.60    1.90
  13  -1  -2   40.70    1.80
 -13   1   2   38.70    1.80
  13   1  -2   36.30    1.80
  13   1  -2   35.00    1.80
  13   1  -2   35.90    1.90
  13   1  -2   39.20    2.60
 -13   1   2   36.70    1.80
 -13   1   2   37.30    1.70
 -13   1   2   38.00    1.90
  13   1  -2   39.50    2.20
  11  -1  -2   29.60    1.50
 -11  -1   2   31.90    1.60
  11  -1  -2   28.10    1.90
 -11  -1   2   29.60    1.50
  11  -1  -2   28.00    1.50
  11  -1  -2   28.70    1.50
  11  -1  -2   27.40    1.60
 -11  -1   2   29.80    1.70
  11  -1  -2   29.00    2.30
 -11  -1   2   27.90    1.50
  11  -1  -2   32.40    1.50
  11   1  -2   29.70    2.00
 -11   1   2   28.90    1.50
  11   1  -2   29.30    1.60
  11   1  -2   28.90    2.30
  11   1  -2   28.70    1.50
  11   1  -2   28.80    1.60
 -11   1   2   26.90    1.50
 -11   1   2   28.30    1.50
 -11   1   2   31.70    1.40
   9  -1  -2   69.89    2.20
   9  -1  -2   68.39    2.20
  -9  -1   2   69.09    2.30
  -9  -1   2   67.89    2.30
   9  -1  -2   67.09    2.30
   9  -1  -2   66.69    2.30
  -9  -1   2   73.89    2.50
   9  -1  -2   68.69    2.20
   9  -1  -2   67.69    2.60
   9  -1  -2   70.69    3.20
  -9  -1   2   71.19    2.40
   9   1  -2   69.59    3.00
  -9   1   2   72.09    2.20
   9   1  -2   70.79    2.70
   9   1  -2   71.29    2.40
   9   1  -2   70.29    2.30
   9   1  -2   67.79    2.30
  -9   1   2   68.19    2.20
  -9   1   2   69.09    2.30
  -9   1   2   75.99    2.20
   7  -1  -2   43.00    1.40
  -7  -1   2   42.10    1.60
  -7  -1   2   39.60    1.50
  -7  -1   2   41.20    1.60
   7  -1  -2   39.80    1.60
   7  -1  -2   40.00    2.40
   7  -1  -2   41.90    1.80
   7  -1  -2   41.90    1.50
  -7  -1   2   42.90    1.50
   7  -1  -2   43.50    1.40
   7  -1  -2   42.20    1.50
  -7   1   2   43.30    1.60
   7   1  -2   40.80    1.60
   7   1  -2   38.90    1.60
   7   1  -2   43.00    2.40
  -7   1   2   42.10    1.50
   7   1  -2   43.80    1.50
  -7   1   2   45.70    1.40
  -7   1   2   43.00    1.40
   5  -1  -2  165.78    3.80
   5  -1  -2  162.78    4.40
  -5  -1   2  161.48    4.00
   5  -1  -2  155.88    4.00
  -5  -1   2  160.28    4.00
   5  -1  -2  154.38    4.90
   5  -1  -2  158.38    3.90
   5  -1  -2  161.58    4.10
  -5   1   2  149.19    4.00
   5   1  -2  151.48    4.00
   5   1  -2  164.08    4.90
   5   1  -2  152.88    4.20
   3  -1  -2  182.78    4.80
   3  -1  -2  162.88    4.10
  -3  -1   2  165.98    4.00
  -3   1   2  154.48    4.30
   3   1  -2  155.28    4.00
   1   1  -2  465.55   10.90
  -1   1   2  416.06   10.40
   1  -1   2   -0.30    0.10
  -1  -1  -2   -0.30    0.20
   1  -1   2   -0.50    0.10
   1  -1   2   -0.40    0.20
   1  -1   2   -0.50    0.20
  -1  -1  -2   -0.40    0.20
   1   1   2   -0.50    0.10
  -1   1  -2   -0.40    0.10
   1   1   2   -0.40    0.10
  -1   1  -2   -0.70    0.20
   1   1   2   -0.60    0.20
   1   1   2   -0.40    0.30
   3  -1   2 1091.09   22.70
  -3  -1  -2 1071.39   23.00
   3  -1   2  974.30   22.70
   3  -1   2 1088.49   25.40
   3  -1   2  818.02   23.00
   3   1   2 1048.50   23.10
  -3   1  -2  913.71   22.70
   5  -1   2 2251.47   56.69
   5  -1   2 2391.46   55.59
   5  -1   2 2243.38   53.59
   5  -1   2 2223.68   54.59
   5  -1   2 2207.18   53.19
  -5  -1  -2 2287.27   55.59
   5  -1   2 2311.37   51.99
  -5  -1  -2 2627.44   54.09
   5  -1   2 2272.57   53.99
  -5   1  -2 2396.86   55.89
   5   1   2 2520.65   53.89
  -5   1  -2 2244.68   53.99
   5   1   2 2158.38   53.59
   5   1   2 2129.29   53.19
   5   1   2 2412.36   53.29
   7  -1   2    9.00    0.90
  -7  -1  -2   13.60    1.60
   7  -1   2   10.40    0.80
  -7  -1  -2   10.60    1.00
   7  -1   2    8.60    1.00
  -7  -1  -2   11.60    1.10
   7  -1   2   10.10    0.80
   7  -1   2   10.10    1.10
   7  -1   2   12.30    1.20
  -7   1  -2   10.00    1.20
   7   1   2   10.00    1.00
   7   1   2   11.60    0.90
   7   1   2   12.00    1.00
   7   1   2    8.20    0.90
   7   1   2   10.70    1.10
  -7   1  -2   10.50    1.20
  -7   1  -2   10.20    1.00
  -7   1  -2    9.80    0.80
   9  -1   2   41.00    1.70
   9  -1   2   38.80    1.70
  -9  -1  -2   39.80    1.80
   9  -1   2   38.80    1.70
   9  -1   2   39.50    1.90
  -9  -1  -2   39.90    2.30
  -9  -1  -2   37.90    1.60
   9  -1   2   40.60    1.80
   9  -1   2   38.70    1.90
   9  -1   2   39.00    1.80
  -9   1  -2   37.50    2.00
   9   1   2   39.30    2.10
  -9   1  -2   40.90    1.70
  -9   1  -2   39.20    1.90
   9   1   2   39.00    1.70
   9   1   2   39.40    1.80
   9   1   2   44.20    1.70
   9   1   2   38.50    1.60
  -9   1  -2   39.30    1.80
  11  -1   2  238.58    6.40
  11  -1   2  234.48    6.80
 -11  -1  -2  246.68    6.40
  11  -1   2  241.48    6.40
  11  -1   2  243.68    6.80
  11  -1   2  243.58    6.50
 -11  -1  -2  239.78    6.60
 -11  -1  -2  251.37    7.20
  11  -1   2  251.47    6.80
  11  -1   2  249.68    6.60
 -11  -1  -2  242.08    6.50
 -11   1  -2  245.78    6.60
 -11   1  -2  246.88    6.90
 -11   1  -2  241.68    6.40
  11   1   2  246.18    6.70
 -11   1  -2  243.98    6.90
  11   1   2  254.77    6.60
  11   1   2  245.58    7.00
  11   1   2  245.38    6.50
  11   1   2  247.98    6.40
 -13  -1  -2    3.90    1.50
  13  -1   2    2.30    0.90
 -13  -1  -2    4.20    0.90
  13  -1   2    3.40    1.10
  13  -1   2    4.10    1.00
 -13  -1  -2    2.20    0.80
  13  -1   2    2.70    0.90
  13  -1   2    5.70    1.40
 -13  -1  -2    3.40    1.00
  13  -1   2    4.10    0.80
  13  -1   2    3.50    1.00
  13   1   2    2.90    1.00
 -13   1  -2    4.00    1.30
  13   1   2    4.40    0.90
 -13   1  -2    3.80    1.10
 -13   1  -2    3.80    0.80
 -13   1  -2    2.90    1.00
  13   1   2    3.50    1.30
  13   1   2    2.10    1.00
 -13   1  -2    4.00    0.90
  13   1   2    1.40    0.90
  15  -1   2   23.70    2.10
 -15  -1  -2   24.10    1.90
 -15  -1  -2   21.70    1.50
  15  -1   2   25.80    1.90
  15  -1   2   21.70    1.90
  15  -1   2   25.50    2.40
  15  -1   2   22.60    1.80
 -15  -1  -2   24.50    2.00
  15  -1   2   22.40    1.50
 -15  -1  -2   27.30    2.70
 -15   1  -2   22.30    1.50
 -15   1  -2   22.10    1.80
  15   1   2   19.90    1.90
 -15   1  -2   24.40    2.00
  15   1   2   21.20    2.00
  15   1   2   20.10    1.70
  15   1   2   20.60    1.60
 -15   1  -2   25.10    2.40
 -15   1  -2   21.30    1.90
  15   1   2   27.90    2.00
 -17  -1  -2    5.00    1.10
 -17  -1  -2    6.90    2.00
  17  -1   2    6.50    1.30
 -17  -1  -2    6.00    1.10
  17  -1   2    5.30    1.10
  17  -1   2    6.50    1.20
  17  -1   2    5.30    1.30
 -17  -1  -2   11.00    1.50
  17  -1   2    4.50    1.50
  17   1   2    3.70    1.10
  17   1   2    3.50    1.00
 -17   1  -2    4.30    1.20
 -17   1  -2    6.40    1.20
  17   1   2    6.20    1.50
 -17   1  -2    5.90    1.20
 -17   1  -2    5.80    1.80
  17   1   2    5.80    1.10
 -19  -1  -2    1.10    1.40
 -19  -1  -2    1.20    1.00
  19  -1   2   -0.80    1.20
  19  -1   2   -0.30    1.00
  19  -1   2   -0.30    1.30
  19  -1   2    0.80    1.10
 -19  -1  -2   -0.20    1.20
 -19  -1  -2    0.80    2.00
  19  -1   2    0.40    0.90
 -19   1  -2   -2.40    1.20
  19   1   2    2.00    1.30
  19   1   2    0.70    1.00
  19   1   2   -2.50    1.60
  19   1   2   -0.70    1.00
 -19   1  -2   -0.60    1.80
 -19   1  -2    1.20    1.10
 -19   1  -2    1.60    1.30
 -21  -1  -2    6.00    2.40
  21  -1   2    4.70    1.30
  21  -1   2    5.20    1.50
  21  -1   2    6.80    1.50
  21  -1   2    6.00    1.90
 -21  -1  -2    4.10    1.60
 -21  -1  -2    8.50    1.60
 -21  -1  -2    7.40    1.70
  21  -1   2    4.20    1.60
  21   1   2    5.50    1.60
  21   1   2    5.40    1.70
 -21   1  -2    6.40    1.60
 -21   1  -2    4.90    1.30
 -21   1  -2    5.10    2.20
  21   1   2    4.40    1.30
 -21   1  -2    4.90    1.30
  21   1   2    4.00    1.60
  23  -1   2    5.00    1.40
 -23  -1  -2    1.60    2.40
  23  -1   2    2.60    1.80
 -23  -1  -2    3.00    1.40
 -23  -1  -2    4.20    1.20
  23  -1   2    3.50    1.30
 -23  -1  -2    4.80    1.70
  23  -1   2    3.80    1.90
  23  -1   2    2.40    1.20
 -23   1  -2    3.00    1.20
 -23   1  -2    3.30    1.20
  23   1   2    2.70    1.20
 -23   1  -2    0.00    2.60
  23   1   2    4.10    1.70
 -23   1  -2    0.70    1.60
  23   1   2    5.80    1.70
  23   1   2    4.50    1.70
 -25  -1  -2    2.00    1.60
  25  -1   2    3.40    2.00
  25  -1   2    2.30    1.70
  25  -1   2   -0.20    1.20
 -25  -1  -2    0.80    1.60
 -25  -1  -2   -0.50    1.70
  25  -1   2    1.50    1.70
 -25   1  -2    1.00    1.80
  25   1   2    4.70    1.90
 -25   1  -2    3.30    1.60
  25   1   2    2.50    1.70
  25   1   2    3.50    1.80
  25   1   2    4.10    2.20
 -25   1  -2    1.70    1.20
 -27  -1  -2   -0.10    1.30
  27  -1   2   -1.10    1.80
  27  -1   2   -0.20    1.30
 -27  -1  -2   -1.10    1.90
  27  -1   2    2.60    2.20
  27   1   2    1.80    1.40
 -27   1  -2   -1.90    1.90
  27   1   2    2.70    2.40
 -27   1  -2    3.10    1.80
 -27   1  -2   -1.20    1.30
  27   1   2   -1.80    1.20
 -29  -1  -2   -0.70    1.80
  29  -1   2    1.70    2.00
 -29  -1  -2    1.80    2.20
  29  -1   2    0.30    1.50
  29  -1   2    4.50    2.50
  29   1   2    1.50    2.10
  29   1   2   -0.40    1.90
 -29   1  -2    2.70    1.50
 -29   1  -2   -2.60    2.10
  29   1   2    7.00    2.70
 -29   1  -2    1.30    2.00
  30  -2  -2   -1.60    2.10
  30  -2  -2    5.00    2.10
 -30  -2   2   -1.00    1.90
  30  -2  -2   -1.60    2.00
 -30  -2   2    0.50    2.20
 -30  -2   2    2.70    1.70
 -30   2   2   -0.90    2.00
  30   2  -2    2.20    2.30
  30   2  -2    6.70    3.00
 -30   2   2   -3.50    1.90
  28  -2  -2    0.80    2.00
 -28  -2   2    1.00    1.40
 -28  -2   2    0.70    1.80
 -28  -2   2   -3.00    1.90
  28  -2  -2   -0.20    1.90
  28  -2  -2    3.50    1.90
  28   2  -2    2.40    1.60
 -28   2   2    1.70    2.00
 -28   2   2   -2.10    1.80
  28   2  -2    1.40    1.90
  28   2  -2    1.50    2.10
  26  -2  -2    5.90    2.40
 -26  -2   2    0.30    1.90
  26  -2  -2    5.70    2.10
 -26  -2   2    5.50    1.90
  26  -2  -2    3.00    1.90
 -26  -2   2    2.10    1.40
 -26   2   2    2.40    1.80
 -26   2   2    2.10    1.90
  26   2  -2    3.00    1.60
  26   2  -2    5.20    2.50
 -26   2   2   -0.30    1.60
  26   2  -2    2.30    1.90
  24  -2  -2    0.30    1.60
 -24  -2   2    0.00    1.70
  24  -2  -2    0.80    1.20
 -24  -2   2    0.10    1.50
  24  -2  -2    2.60    2.10
 -24  -2   2    1.00    1.10
 -24  -2   2    1.50    1.20
  24  -2  -2    1.00    1.60
  24   2  -2    1.10    1.20
 -24   2   2    1.10    1.40
  24   2  -2    0.80    1.60
 -24   2   2    2.00    1.20
 -24   2   2   -0.60    1.60
 -24   2   2   -0.20    1.50
  24   2  -2    1.90    1.70
  24   2  -2   -0.10    1.50
  22  -2  -2    7.10    1.50
 -22  -2   2    5.70    1.60
  22  -2  -2    7.10    1.80
 -22  -2   2    4.90    1.30
 -22  -2   2    6.40    1.90
 -22  -2   2    6.30    1.60
  22  -2  -2    5.90    1.70
  22  -2  -2    4.60    1.60
  22   2  -2    6.80    2.20
 -22   2   2    4.00    1.50
  22   2  -2    6.60    1.70
 -22   2   2    6.80    1.60
  22   2  -2    8.10    1.70
  22   2  -2    4.50    1.30
 -22   2   2    5.50    1.40
 -22   2   2    4.50    1.50
 -20  -2   2   -1.20    1.40
  20  -2  -2   -0.60    1.20
 -20  -2   2    0.90    1.00
  20  -2  -2   -0.10    1.30
  20  -2  -2   -2.90    1.50
 -20  -2   2    0.60    0.90
 -20  -2   2   -0.70    0.90
  20  -2  -2   -2.20    1.20
  20   2  -2   -1.40    0.80
  20   2  -2   -2.10    1.20
 -20   2   2   -1.20    1.20
  20   2  -2   -0.50    1.20
 -20   2   2   -1.20    1.10
 -20   2   2    0.20    1.30
 -20   2   2    0.20    1.20
  20   2  -2    1.60    1.00
  18  -2  -2    7.90    1.50
  18  -2  -2   10.50    2.30
  18  -2  -2    9.00    1.60
  18  -2  -2    8.10    1.50
 -18  -2   2   10.60    1.60
 -18  -2   2   10.00    1.40
 -18  -2   2    8.80    1.40
 -18  -2   2    8.90    1.40
  18  -2  -2    7.80    1.90
 -18  -2   2   11.10    2.10
 -18   2   2   13.20    1.70
  18   2  -2    9.30    1.40
  18   2  -2    9.00    1.60
 -18   2   2   10.20    1.40
 -18   2   2    8.40    1.40
  18   2  -2    7.80    1.30
  18   2  -2    8.60    2.00
 -18   2   2    8.50    1.50
 -16  -2   2   35.70    2.10
  16  -2  -2   36.40    2.30
  16  -2  -2   35.60    2.00
  16  -2  -2   35.80    2.70
  16  -2  -2   32.40    1.90
 -16  -2   2   31.00    2.20
 -16  -2   2   36.30    2.60
  16  -2  -2   33.40    2.10
  16  -2  -2   31.30    3.10
  16  -2  -2   32.30    1.90
 -16  -2   2   32.40    2.00
  16   2  -2   33.50    2.20
 -16   2   2   36.90    1.90
 -16   2   2   34.80    2.20
  16   2  -2   33.60    2.40
 -16   2   2   33.70    2.20
 -16   2   2   32.60    1.80
  16   2  -2   37.20    2.20
 -16   2   2   34.20    2.20
  16   2  -2   35.50    2.30
 -14  -2   2   31.80    2.00
  14  -2  -2   29.00    2.00
  14  -2  -2   27.50    2.70
 -14  -2   2   28.90    1.60
  14  -2  -2   29.50    1.60
  14  -2  -2   31.00    1.90
 -14  -2   2   31.70    2.10
  14  -2  -2   32.40    1.90
  14  -2  -2   27.90    1.80
  14  -2  -2   29.60    1.80
 -14  -2   2   32.60    2.00
  14   2  -2   28.10    2.40
  14   2  -2   33.10    1.90
 -14   2   2   30.10    1.70
 -14   2   2   28.20    1.60
 -14   2   2   27.90    1.80
  14   2  -2   28.90    1.70
  14   2  -2   27.40    1.70
  14   2  -2   31.50    2.50
 -14   2   2   31.00    1.90
 -12  -2   2    1.40    0.90
  12  -2  -2    0.90    1.30
 -12  -2   2    3.30    1.00
  12  -2  -2    3.80    0.70
  12  -2  -2    3.20    0.90
  12  -2  -2    1.50    0.60
 -12  -2   2    1.40    0.80
  12  -2  -2    1.90    0.60
  12  -2  -2    2.70    0.70
  12  -2  -2    2.60    0.80
  12   2  -2    2.50    1.20
  12   2  -2    2.50    0.90
  12   2  -2    2.70    0.80
 -12   2   2    2.10    0.70
 -12   2   2    2.70    0.60
  12   2  -2    2.10    0.80
  12   2  -2    2.30    1.40
 -12   2   2    3.30    0.80
 -12   2   2    3.00    0.70
  10  -2  -2   84.39    2.70
  10  -2  -2   83.09    2.80
  10  -2  -2   75.09    3.80
 -10  -2   2   83.99    3.00
 -10  -2   2   81.19    2.70
  10  -2  -2   82.19    2.70
  10  -2  -2   83.39    2.60
  10  -2  -2   81.89    3.20
 -10  -2   2   82.79    2.70
  10  -2  -2   78.49    2.50
 -10   2   2   81.29    2.60
 -10   2   2   76.49    2.40
  10   2  -2   81.79    3.20
 -10   2   2   84.49    2.80
  10   2  -2   83.39    2.70
  10   2  -2   85.99    3.80
  10   2  -2   82.79    2.80
 -10   2   2   86.09    2.70
  10   2  -2   82.29    2.80
   8  -2  -2  105.19    2.80
   8  -2  -2  108.79    4.30
   8  -2  -2  104.09    3.10
  -8  -2   2  104.29    3.30
   8  -2  -2  102.69    3.00
   8  -2  -2  105.99    3.10
   8  -2  -2  109.39    3.60
  -8  -2   2  105.19    3.10
   8  -2  -2  103.09    3.00
  -8  -2   2  107.09    3.20
  -8   2   2  118.89    3.80
   8   2  -2  105.49    4.20
   8   2  -2  105.09    3.50
   8   2  -2  103.89    3.10
  -8   2   2  103.39    3.10
  -8   2   2  106.19    3.00
   8   2  -2  107.69    3.10
  -8   2   2  107.89    2.90
  -6  -2   2    3.20    0.60
   6  -2  -2    4.10    0.70
   6  -2  -2    5.60    0.50
  -6  -2   2    3.60    0.60
   6  -2  -2    2.50    1.10
  -6  -2   2    4.50    0.60
   6  -2  -2    4.30    0.60
   6  -2  -2    5.10    0.50
   6  -2  -2    4.60    0.60
   6  -2  -2    4.70    0.60
  -6  -2   2    2.50    0.60
   6   2  -2    3.50    0.50
  -6   2   2    4.70    0.40
   6   2  -2    4.40    0.50
  -6   2   2    4.70    0.80
  -6   2   2    4.70    0.50
   6   2  -2    5.00    0.90
  -6   2   2    4.70    0.60
  -4  -2   2  123.59    3.30
   4  -2  -2  129.29    4.30
  -4  -2   2  127.59    3.30
   4  -2  -2  126.29    3.20
  -4  -2   2  128.39    3.10
   4  -2  -2  128.79    3.30
   4  -2  -2  125.09    3.70
   4  -2  -2  123.59    3.30
   4   2  -2  123.49    3.20
  -4   2   2  128.79    3.80
   4   2  -2  128.39    4.30
   4   2  -2  113.09    3.40
  -4   2   2  104.59    3.20
   2  -2  -2 5199.18  135.29
  -2  -2   2 6527.55  132.89
  -2  -2   2 5894.91  132.89
  -2  -2   2 5104.69  132.29
   2  -2  -2 5827.22  132.89
   2   2  -2 6510.25  132.69
   2   2  -2 5833.52  138.59
   0  -2  -2   -0.10    0.40
   0  -2  -2   -0.90    0.30
   0  -2   2   -0.40    0.20
   0  -2   2   -0.40    0.20
   0  -2   2   -0.50    0.20
   0  -2   2   -0.40    0.30
   0   2   2   -0.20    0.50
   0   2   2   -0.20    0.10
   0   2   2    0.10    0.20
   0   2  -2   -0.20    0.20
   0   2  -2    1.30    0.60
   2  -2   2    7.40    0.60
  -2  -2  -2   10.40    0.60
  -2  -2  -2    9.00    0.60
   2  -2   2    7.90    0.60
   2  -2   2    9.90    0.60
  -2  -2  -2    8.00    1.00
   2  -2   2    8.70    1.10
   2  -2   2    9.40    0.60
   2   2   2   10.20    1.10
  -2   2  -2    8.10    1.10
  -2   2  -2    6.60    0.50
   4  -2   2  415.26   10.00
  -4  -2  -2  429.76   10.40
   4  -2   2  417.86    9.60
   4  -2   2  401.46    9.60
   4  -2   2  405.56   10.40
   4  -2   2  417.36    9.70
  -4  -2  -2  422.86    9.80
  -4  -2  -2  417.46    9.70
   4  -2   2  431.96    9.70
  -4   2  -2  417.46    9.70
   4   2   2  414.16   10.30
   4   2   2  364.36    9.70
  -4   2  -2  403.76   10.50
   6  -2   2  171.98    4.50
   6  -2   2  174.88    4.50
   6  -2   2  178.18    4.60
   6  -2   2  170.68    5.20
   6  -2   2  175.98    4.60
  -6  -2  -2  179.88    4.60
  -6  -2  -2  175.98    5.20
  -6  -2  -2  173.28    4.50
   6  -2   2  174.78    4.80
   6  -2   2  171.38    4.40
  -6   2  -2  175.58    4.60
   6   2   2  172.58    5.10
  -6   2  -2  171.68    5.30
  -6   2  -2  173.58    4.90
   6   2   2  172.08    4.50
   6   2   2  175.68    4.40
   6   2   2  172.88    4.60
  -8  -2  -2   20.20    1.30
  -8  -2  -2   22.60    1.30
   8  -2   2   20.80    1.40
   8  -2   2   20.60    1.60
   8  -2   2   21.70    1.30
   8  -2   2   21.00    1.30
   8  -2   2   21.50    1.20
  -8  -2  -2   21.00    2.00
  -8  -2  -2   21.60    1.20
   8  -2   2   22.10    1.20
   8  -2   2   21.70    1.10
   8   2   2   21.50    1.20
  -8   2  -2   21.70    1.30
   8   2   2   23.40    1.60
  -8   2  -2   21.10    1.70
  -8   2  -2   22.10    1.40
   8   2   2   22.40    1.30
   8   2   2   21.00    1.30
  10  -2   2   33.30    1.80
  10  -2   2   34.80    1.60
  10  -2   2   34.20    1.50
 -10  -2  -2   32.70    1.80
 -10  -2  -2   31.20    2.50
  10  -2   2   33.40    1.70
  10  -2   2   34.00    2.10
 -10  -2  -2   32.90    1.60
 -10  -2  -2   33.40    1.50
  10  -2   2   31.90    1.80
  10  -2   2   32.10    1.60
 -10   2  -2   33.90    2.20
 -10   2  -2   33.70    1.50
 -10   2  -2   32.30    1.90
  10   2   2   36.70    1.80
  10   2   2   35.00    2.30
  10   2   2   32.90    1.50
 -10   2  -2   36.30    1.80
  10   2   2   35.30    1.70
 -12  -2  -2   93.39    3.90
  12  -2   2   96.49    3.40
 -12  -2  -2   99.59    3.50
  12  -2   2   96.59    3.10
  12  -2   2   91.49    3.80
  12  -2   2   96.69    3.50
 -12  -2  -2   98.59    3.20
  12  -2   2   96.79    3.20
 -12  -2  -2   88.89    3.20
  12  -2   2   99.49    3.70
  12  -2   2   96.29    3.10
  12   2   2   96.99    3.20
  12   2   2  101.59    3.40
 -12   2  -2   92.79    3.10
 -12   2  -2  101.09    3.80
 -12   2  -2   97.99    4.00
  12   2   2   98.29    3.90
  12   2   2   95.79    3.40
 -12   2  -2   98.49    3.40
  14  -2   2    5.30    1.00
 -14  -2  -2    5.10    1.70
  14  -2   2    4.80    0.90
  14  -2   2    4.50    1.10
  14  -2   2    3.90    0.80
 -14  -2  -2    5.50    1.00
 -14  -2  -2    6.60    1.20
  14  -2   2    5.50    1.20
  14  -2   2    5.70    1.30
 -14  -2  -2    3.80    1.00
  14  -2   2    6.00    1.10
 -14   2  -2    4.20    1.10
  14   2   2    4.90    1.60
  14   2   2    5.70    1.00
 -14   2  -2    3.60    1.00
 -14   2  -2    3.50    1.00
  14   2   2    4.80    1.10
 -14   2  -2    5.70    1.30
 -14   2  -2    6.00    0.90
  14   2   2    4.50    1.10
  16  -2   2   42.90    2.30
 -16  -2  -2   40.50    2.10
  16  -2   2   43.80    2.70
  16  -2   2   40.60    2.30
 -16  -2  -2   39.90    2.20
  16  -2   2   38.50    2.60
  16  -2   2   41.30    2.30
 -16  -2  -2   39.60    2.30
  16  -2   2   49.20    3.40
 -16  -2  -2   39.30    3.40
  16  -2   2   38.60    2.10
  16   2   2   39.00    2.20
 -16   2  -2   42.60    2.30
 -16   2  -2   39.90    2.90
 -16   2  -2   44.00    3.00
 -16   2  -2   37.00    2.10
  16   2   2   35.80    2.20
  16   2   2   38.40    3.20
 -16   2  -2   39.10    2.20
  16   2   2   40.40    2.10
 -18  -2  -2  109.19    4.50
  18  -2   2  116.89    5.00
  18  -2   2  112.29    4.20
 -18  -2  -2  113.99    4.20
 -18  -2  -2  103.69    4.00
  18  -2   2  112.09    4.40
  18  -2   2  103.69    4.40
  18  -2   2  109.89    4.20
  18  -2   2  105.49    4.00
 -18  -2  -2  115.79    5.40
  18   2   2  112.39    4.50
  18   2   2  101.19    4.00
  18   2   2  118.69    5.20
 -18   2  -2  116.69    4.50
 -18   2  -2  111.39    4.20
  18   2   2  113.69    4.20
 -18   2  -2  109.79    4.10
 -18   2  -2  116.09    5.00
 -20  -2  -2   24.40    2.10
  20  -2   2   27.40    2.80
  20  -2   2   29.90    2.40
 -20  -2  -2   27.20    3.60
 -20  -2  -2   26.20    2.00
 -20  -2  -2   25.20    2.20
  20  -2   2   30.70    2.50
  20  -2   2   24.70    2.10
  20  -2   2   22.90    2.20
  20   2   2   24.60    2.20
 -20   2  -2   23.40    2.10
  20   2   2   26.30    2.20
  20   2   2   24.70    2.00
  20   2   2   25.10    2.70
 -20   2  -2   28.00    2.10
 -20   2  -2   33.40    3.40
 -20   2  -2   24.70    2.40
  22  -2   2    6.50    1.30
  22  -2   2    4.00    1.30
 -22  -2  -2    6.00    1.70
  22  -2   2    7.80    2.00
  22  -2   2    7.20    1.90
 -22  -2  -2    8.40    1.70
 -22  -2  -2    6.80    1.50
 -22  -2  -2    9.80    2.60
  22  -2   2    7.50    1.80
  22   2   2    5.90    1.40
  22   2   2    7.00    2.30
 -22   2  -2    7.50    1.80
  22   2   2    6.80    1.70
 -22   2  -2    5.20    1.60
  22   2   2    4.80    1.70
 -22   2  -2    8.20    1.50
 -22   2  -2    5.40    2.60
 -24  -2  -2    4.70    1.90
 -24  -2  -2    4.10    1.70
 -24  -2  -2    3.20    1.30
  24  -2   2    6.70    2.10
  24  -2   2    5.30    1.80
  24  -2   2    3.80    1.80
  24  -2   2    3.20    1.90
  24  -2   2    7.20    1.80
  24   2   2    4.80    1.50
  24   2   2    5.30    1.90
  24   2   2    7.30    2.40
 -24   2  -2    6.50    1.80
  24   2   2    3.90    1.70
 -24   2  -2    6.00    2.00
 -24   2  -2    6.10    1.70
 -26  -2  -2    8.30    2.30
 -26  -2  -2    8.20    2.00
  26  -2   2    7.00    2.20
  26  -2   2    9.30    1.80
  26  -2   2   13.30    2.60
  26  -2   2   10.00    2.10
 -26   2  -2    8.90    1.70
  26   2   2    8.40    2.20
 -26   2  -2   10.40    2.20
  26   2   2    7.70    2.20
  26   2   2    9.80    2.30
 -26   2  -2    8.40    2.20
 -28  -2  -2   -0.40    2.20
  28  -2   2    5.00    2.00
  28  -2   2    2.10    2.00
  28  -2   2    7.90    2.40
 -28  -2  -2   -2.00    1.70
 -28   2  -2    2.20    1.90
 -28   2  -2    3.10    2.00
  28   2   2    4.60    2.10
 -28   2  -2   -1.60    2.00
  28   2   2    1.10    1.50
  28   2   2    3.90    2.20
 -30  -2  -2    3.40    1.60
 -30  -2  -2    1.20    1.90
 -30   2  -2    1.00    2.10
 -30   2  -2    3.20    2.30
 -30   2  -2    4.30    2.20
 -29  -3   2    1.10    2.00
  29  -3  -2    3.80    2.20
  29  -3  -2   -1.20    2.00
 -29  -3   2    0.60    2.20
  29  -3  -2    8.60    2.70
 -29  -3   2    0.40    2.10
 -29   3   2   -0.90    2.00
  29   3  -2   -0.90    2.10
 -29   3   2   -0.30    2.00
  29   3  -2    9.60    3.00
 -29   3   2   -0.20    3.10
  27  -3  -2    1.30    2.00
  27  -3  -2   -0.20    1.80
  27  -3  -2    6.30    2.50
 -27  -3   2    4.90    2.30
 -27  -3   2   -0.30    1.80
 -27  -3   2    2.50    1.80
  27   3  -2    3.00    2.00
 -27   3   2    1.30    1.90
 -27   3   2   -0.20    1.90
  27   3  -2    3.20    2.00
 -25  -3   2   -1.10    1.90
  25  -3  -2    3.20    2.10
 -25  -3   2    1.10    1.20
  25  -3  -2    0.30    1.50
  25  -3  -2    1.10    1.80
 -25  -3   2    2.40    1.60
 -25  -3   2   -0.80    1.20
  25  -3  -2    0.40    1.70
  25   3  -2    1.20    1.50
 -25   3   2    1.20    1.50
 -25   3   2   -0.80    1.70
 -25   3   2    0.80    1.60
  25   3  -2    3.80    2.50
  25   3  -2    2.00    1.40
  25   3  -2    0.40    1.60
 -23  -3   2   -0.40    1.70
 -23  -3   2   -1.30    1.40
  23  -3  -2    2.50    1.30
  23  -3  -2    0.70    1.50
 -23  -3   2   -0.90    1.40
 -23  -3   2   -0.20    1.10
  23  -3  -2   -2.20    1.50
  23  -3  -2    2.60    2.00
  23   3  -2    0.40    1.10
  23   3  -2    1.50    1.70
 -23   3   2    0.00    1.30
  23   3  -2    1.80    1.30
  23   3  -2    1.80    1.70
 -23   3   2   -1.30    1.40
 -23   3   2    1.10    1.50
 -23   3   2    0.80    1.20
 -21  -3   2   22.10    2.10
  21  -3  -2   25.60    2.40
 -21  -3   2   26.80    2.60
  21  -3  -2   24.90    2.20
  21  -3  -2   31.70    3.40
 -21  -3   2   25.70    2.20
  21  -3  -2   29.80    2.60
 -21  -3   2   25.10    2.30
 -21   3   2   30.80    2.50
 -21   3   2   28.40    2.70
  21   3  -2   25.80    2.20
  21   3  -2   25.90    2.60
 -21   3   2   22.30    2.10
 -21   3   2   27.10    2.40
  21   3  -2   26.80    2.80
  21   3  -2   24.90    2.20
  19  -3  -2   21.60    2.20
 -19  -3   2   17.90    1.90
  19  -3  -2   17.30    1.80
  19  -3  -2   16.90    3.10
 -19  -3   2   18.00    1.80
  19  -3  -2   18.10    1.80
  19  -3  -2   16.70    2.00
 -19  -3   2   18.20    2.00
 -19  -3   2   17.10    1.90
  19  -3  -2   14.60    2.40
 -19   3   2   17.40    1.80
  19   3  -2   19.10    2.60
  19   3  -2   16.70    2.00
 -19   3   2   22.20    2.10
 -19   3   2   17.70    1.80
  19   3  -2   18.80    1.80
  19   3  -2   14.60    1.70
 -19   3   2   16.80    2.00
 -17  -3   2    3.50    1.30
  17  -3  -2    3.80    1.00
  17  -3  -2    6.20    2.10
 -17  -3   2    6.50    1.30
  17  -3  -2    3.80    1.00
  17  -3  -2    5.00    1.30
  17  -3  -2    5.60    1.40
 -17  -3   2    7.90    1.70
 -17  -3   2    4.90    1.30
  17  -3  -2    6.20    1.10
  17   3  -2    7.40    1.90
  17   3  -2    3.60    1.30
 -17   3   2    7.20    1.10
 -17   3   2    4.40    1.10
 -17   3   2    4.50    1.20
  17   3  -2    4.80    1.10
  17   3  -2    3.90    1.40
 -17   3   2    3.10    1.20
  15  -3  -2   21.80    1.60
  15  -3  -2   23.30    1.50
  15  -3  -2   22.70    1.90
 -15  -3   2   23.10    2.30
  15  -3  -2   21.80    1.60
 -15  -3   2   22.00    2.00
 -15  -3   2   23.90    1.80
  15  -3  -2   21.90    1.70
 -15  -3   2   19.30    1.80
  15  -3  -2   21.90    2.30
  15  -3  -2   19.70    2.80
 -15   3   2   20.80    1.60
  15   3  -2   20.70    1.80
  15   3  -2   19.20    1.80
  15   3  -2   20.30    2.50
 -15   3   2   25.70    1.50
 -15   3   2   21.60    1.60
 -15   3   2   23.20    1.60
 -15   3   2   22.00    1.70
  15   3  -2   20.10    1.70
  13  -3  -2   -2.00    1.30
 -13  -3   2    1.20    0.70
  13  -3  -2   -0.40    0.70
  13  -3  -2    0.40    0.70
 -13  -3   2    0.50    0.60
 -13  -3   2    0.70    0.90
  13  -3  -2    1.10    0.60
 -13  -3   2    0.80    1.00
  13  -3  -2    0.20    0.80
  13  -3  -2    0.40    0.70
  13  -3  -2    0.40    0.80
 -13   3   2    0.60    0.60
  13   3  -2    0.50    0.80
  13   3  -2    0.20    0.80
  13   3  -2    0.90    0.60
 -13   3   2    1.10    0.60
 -13   3   2    1.20    0.80
 -13   3   2    2.50    0.90
  13   3  -2    0.50    1.30
  13   3  -2    1.20    1.70
 -13   3   2    1.10    0.90
  11  -3  -2   96.19    3.70
  11  -3  -2   95.29    3.20
  11  -3  -2  101.89    3.10
  11  -3  -2  101.69    3.20
  11  -3  -2  102.39    3.30
 -11  -3   2   99.69    3.20
  11  -3  -2   98.49    2.90
  11  -3  -2   97.79    4.70
 -11  -3   2   97.69    3.30
 -11  -3   2  100.69    3.60
  11   3  -2  105.59    3.90
  11   3  -2   97.99    3.30
 -11   3   2   98.59    3.20
 -11   3   2   95.69    3.00
  11   3  -2  100.49    3.20
 -11   3   2  102.19    3.90
 -11   3   2   95.59    2.90
  11   3  -2  100.89    4.50
   9  -3  -2  547.75   12.80
   9  -3  -2  533.25   13.50
  -9  -3   2  525.25   13.20
   9  -3  -2  524.75   12.60
   9  -3  -2  525.45   12.80
   9  -3  -2  544.75   12.50
  -9  -3   2  529.75   12.80
   9  -3  -2  535.55   12.80
   9  -3  -2  509.35   14.40
  -9  -3   2  539.95   12.90
   9   3  -2  521.25   12.70
  -9   3   2  538.45   12.50
  -9   3   2  546.55   13.60
  -9   3   2  532.95   12.80
   9   3  -2  530.95   14.00
   9   3  -2  542.05   12.80
   9   3  -2  544.55   13.40
  -9   3   2  519.65   12.50
  -7  -3   2   88.59    2.70
   7  -3  -2   87.29    3.90
   7  -3  -2   87.29    3.20
   7  -3  -2   91.29    2.80
  -7  -3   2   94.39    2.90
  -7  -3   2   87.99    3.10
   7  -3  -2   88.79    2.50
   7  -3  -2   90.49    2.70
   7  -3  -2   91.49    2.80
   7  -3  -2   88.99    2.40
   7   3  -2   91.19    2.70
  -7   3   2   89.89    3.30
   7   3  -2   92.09    2.60
  -7   3   2   91.49    2.80
  -7   3   2   87.89    2.50
  -7   3   2   88.49    2.40
   7   3  -2   89.89    3.20
   7   3  -2   89.29    3.90
   5  -3  -2   55.69    1.90
   5  -3  -2   51.89    1.50
  -5  -3   2   52.49    2.10
   5  -3  -2   53.39    2.30
   5  -3  -2   54.89    1.70
   5  -3  -2   54.19    2.00
   5  -3  -2   51.29    2.90
  -5  -3   2   54.49    1.90
  -5  -3   2   54.99    1.80
   5  -3  -2   54.29    1.60
   5   3  -2   58.49    3.00
  -5   3   2   55.09    1.60
  -5   3   2   55.19    1.90
  -5   3   2   54.69    2.30
   5   3  -2   55.39    1.70
   5   3  -2   56.79    2.30
   5   3  -2   54.59    1.70
   3  -3  -2   67.39    2.30
  -3  -3   2   64.89    2.30
   3  -3  -2   67.29    1.90
   3  -3  -2   65.39    3.10
  -3  -3   2   68.79    2.00
   3  -3  -2   67.09    1.70
  -3  -3   2   66.69    2.20
  -3  -3   2   69.19    1.80
   3  -3  -2   64.59    2.50
  -3   3   2   65.39    2.50
   3   3  -2   65.19    1.80
   3   3  -2   66.09    1.80
   3   3  -2   70.49    3.10
   3   3  -2   66.79    2.30
  -3   3   2   66.49    2.00
   1  -3  -2   90.89    3.50
   1  -3  -2   95.19    2.40
  -1  -3   2   95.69    2.40
   1  -3  -2   94.19    3.00
   1  -3  -2   95.89    2.50
  -1  -3   2   96.09    2.70
  -1  -3   2   90.69    2.90
  -1  -3   2   97.09    2.50
   1   3  -2   83.29    2.70
  -1   3   2   95.09    3.20
   1   3  -2  100.29    3.60
   1   3  -2   91.99    2.30
  -1   3   2   77.99    2.50
   1  -3   2   75.09    1.90
  -1  -3  -2   70.89    2.00
  -1  -3  -2   71.29    2.60
  -1  -3  -2   73.39    2.00
   1  -3   2   73.39    2.00
   1  -3   2   72.99    2.10
   1  -3   2   72.89    2.90
   1  -3   2   73.39    2.40
  -1   3  -2   61.49    2.10
   1   3   2   59.59    2.10
   1   3   2   74.59    2.80
  -1   3  -2   75.49    3.10
  -1   3  -2   74.49    1.90
   3  -3   2  422.46   10.10
  -3  -3  -2  448.26   10.00
   3  -3   2  436.56   10.60
   3  -3   2  437.36    9.90
   3  -3   2  438.66   11.40
   3  -3   2  437.96   10.30
  -3  -3  -2  436.06   10.20
  -3  -3  -2  444.66   10.20
  -3  -3  -2  435.06   11.00
  -3   3  -2  439.46   10.10
  -3   3  -2  440.76   11.50
   3   3   2  421.56   10.30
   3   3   2  397.46   10.00
  -3   3  -2  435.56   10.30
   3   3   2  438.06   11.00
   5  -3   2   93.29    2.60
   5  -3   2   93.79    2.80
   5  -3   2   94.19    3.70
  -5  -3  -2   93.09    2.80
   5  -3   2   98.59    3.20
  -5  -3  -2   90.59    3.00
   5  -3   2   96.89    2.60
  -5  -3  -2   95.69    3.50
  -5  -3  -2   95.29    2.60
  -5  -3  -2   95.39    2.80
   5  -3   2   94.39    2.70
   5  -3   2   96.29    2.80
  -5   3  -2   98.09    2.70
   5   3   2   94.59    2.60
   5   3   2   96.39    3.60
   5   3   2   94.79    3.10
   5   3   2   95.69    2.80
  -5   3  -2   97.59    2.90
  -5   3  -2   96.09    3.80
   7  -3   2   -1.10    0.40
  -7  -3  -2   -0.60    0.40
   7  -3   2    0.10    0.90
   7  -3   2    0.30    0.50
  -7  -3  -2   -0.20    0.50
  -7  -3  -2    0.40    0.50
   7  -3   2   -0.70    0.50
  -7  -3  -2   -0.40    0.60
  -7  -3  -2   -1.00    1.10
   7  -3   2    0.40    0.50
   7  -3   2   -0.10    0.50
   7   3   2   -0.60    0.60
   7   3   2    0.30    0.80
   7   3   2   -0.10    0.60
  -7   3  -2   -0.20    0.40
  -7   3  -2    0.10    0.70
   7   3   2   -0.30    0.50
   7   3   2    0.50    0.40
  -7   3  -2    0.30    0.60
   9  -3   2  100.29    4.10
   9  -3   2  101.29    3.00
  -9  -3  -2  101.99    3.10
  -9  -3  -2  102.89    3.30
   9  -3   2  102.39    3.60
   9  -3   2  100.59    3.20
  -9  -3  -2  101.69    3.30
   9  -3   2  100.79    3.30
   9  -3   2  103.39    3.10
  -9  -3  -2  101.19    4.00
   9  -3   2  101.49    3.10
   9   3   2   99.69    4.00
   9   3   2  104.59    3.30
   9   3   2  101.79    3.10
  -9   3  -2  104.39    3.20
  -9   3  -2  101.89    3.70
   9   3   2   99.99    3.20
  -9   3  -2  103.29    4.30
  11  -3   2  101.99    3.70
  11  -3   2  102.39    3.20
  11  -3   2  101.59    4.30
  11  -3   2  105.59    3.30
  11  -3   2  105.39    3.40
  11  -3   2  102.49    3.60
 -11  -3  -2  106.39    3.50
 -11  -3  -2  108.49    4.50
  11  -3   2  102.89    3.30
 -11  -3  -2  103.29    3.20
 -11  -3  -2   98.49    3.50
  11   3   2  103.59    4.00
  11   3   2  100.19    3.20
 -11   3  -2  105.59    4.50
 -11   3  -2  103.99    3.80
 -11   3  -2  106.09    3.40
  11   3   2  107.79    3.50
  11   3   2  102.69    3.30
 -11   3  -2  106.79    3.40
 -13  -3  -2   52.39    3.10
  13  -3   2   49.60    2.60
  13  -3   2   51.69    2.40
 -13  -3  -2   54.09    2.30
  13  -3   2   51.39    2.30
  13  -3   2   51.79    2.30
 -13  -3  -2   47.90    2.50
 -13  -3  -2   54.89    2.60
  13  -3   2   50.19    3.10
  13  -3   2   51.89    2.30
  13  -3   2   52.99    2.80
  13   3   2   54.39    2.30
  13   3   2   54.39    2.50
 -13   3  -2   54.89    2.40
  13   3   2   56.19    3.40
 -13   3  -2   51.79    3.20
 -13   3  -2   52.29    2.40
  13   3   2   54.79    2.40
 -13   3  -2   54.79    2.90
 -15  -3  -2    2.30    1.00
  15  -3   2    3.60    1.50
 -15  -3  -2    2.90    1.20
  15  -3   2    5.20    1.60
  15  -3   2    3.20    1.20
  15  -3   2    4.50    1.20
  15  -3   2    4.10    1.20
  15  -3   2    3.40    1.10
 -15  -3  -2    4.80    1.90
  15  -3   2    3.80    1.10
 -15  -3  -2    2.90    1.00
 -15   3  -2    2.30    1.10
 -15   3  -2    3.50    1.60
  15   3   2    2.60    1.10
  15   3   2    3.60    1.80
 -15   3  -2    5.90    1.20
  15   3   2    2.90    1.20
 -15   3  -2    4.00    1.00
 -15   3  -2    4.30    1.50
  15   3   2    3.70    1.10
  17  -3   2   35.80    2.50
  17  -3   2   34.60    2.10
  17  -3   2   35.40    2.60
  17  -3   2   38.70    2.40
  17  -3   2   45.60    2.50
 -17  -3  -2   36.80    2.70
 -17  -3  -2   34.00    3.00
  17  -3   2   40.20    3.80
 -17  -3  -2   33.90    2.10
  17  -3   2   36.40    3.10
 -17  -3  -2   34.30    2.60
 -17   3  -2   35.80    2.60
  17   3   2   33.50    2.20
 -17   3  -2   35.30    3.40
 -17   3  -2   37.90    2.30
  17   3   2   39.30    3.50
  17   3   2   38.40    2.70
 -17   3  -2   38.30    2.40
 -17   3  -2   39.50    3.20
  17   3   2   36.40    2.20
  19  -3   2    1.30    1.40
  19  -3   2    0.10    1.30
  19  -3   2    0.70    1.30
  19  -3   2   -0.10    0.90
 -19  -3  -2    1.40    1.30
 -19  -3  -2   -0.30    0.90
  19  -3   2    0.90    0.90
  19  -3   2   -0.30    1.80
 -19  -3  -2    2.60    2.10
 -19  -3  -2    2.20    1.10
  19   3   2    0.20    1.40
 -19   3  -2    0.20    1.20
  19   3   2    1.00    1.00
  19   3   2    0.40    1.30
  19   3   2    0.60    1.30
 -19   3  -2    1.30    0.90
 -19   3  -2    0.00    1.20
 -19   3  -2   -0.20    1.80
  21  -3   2    5.90    1.30
  21  -3   2    8.00    1.60
  21  -3   2    3.90    2.20
  21  -3   2    6.80    1.80
  21  -3   2    5.10    1.30
  21  -3   2    5.20    1.70
 -21  -3  -2    9.20    1.80
 -21  -3  -2    6.90    1.80
 -21  -3  -2    6.10    1.60
 -21  -3  -2    5.40    2.40
  21   3   2    4.80    1.60
  21   3   2    7.00    1.70
 -21   3  -2    5.10    1.70
  21   3   2    5.20    2.30
 -21   3  -2    7.50    2.30
 -21   3  -2    5.90    1.30
  21   3   2    6.20    1.70
 -21   3  -2    5.00    1.30
  23  -3   2    3.70    1.80
  23  -3   2    0.30    1.10
  23  -3   2    3.40    1.60
 -23  -3  -2    2.30    2.40
  23  -3   2   -0.20    1.60
  23  -3   2   -2.20    1.40
 -23  -3  -2    1.00    1.70
 -23  -3  -2    2.40    1.60
 -23  -3  -2    1.60    1.20
  23   3   2    1.00    1.20
 -23   3  -2    0.80    1.20
 -23   3  -2    1.90    1.20
 -23   3  -2    2.40    1.50
  23   3   2   -1.40    1.10
  23   3   2    1.70    1.60
  23   3   2    2.50    2.30
 -23   3  -2    1.10    1.50
  25  -3   2    2.30    1.80
  25  -3   2    8.60    2.20
 -25  -3  -2    7.00    1.60
 -25  -3  -2    4.10    2.00
  25  -3   2    5.60    1.50
  25  -3   2    2.10    1.90
  25  -3   2    4.10    1.80
  25   3   2    5.90    1.60
 -25   3  -2    4.90    1.90
  25   3   2    3.90    1.50
 -25   3  -2    3.50    1.80
 -25   3  -2    3.80    1.80
 -25   3  -2    4.50    1.80
  25   3   2    4.60    2.00
 -27  -3  -2    0.20    1.90
  27  -3   2    6.90    2.00
 -27  -3  -2    3.80    2.40
  27  -3   2    7.50    2.40
  27  -3   2    0.90    2.10
  27  -3   2    4.70    2.00
  27   3   2    3.80    2.10
  27   3   2    3.60    2.10
  27   3   2    5.00    2.20
 -27   3  -2    1.80    1.40
 -27   3  -2    3.20    1.90
 -27   3  -2    3.10    2.10
  29  -3   2    0.00    2.00
 -29  -3  -2    1.40    2.50
 -29  -3  -2    0.40    2.00
  29  -3   2    4.20    2.20
  29  -3   2    6.20    2.60
 -29   3  -2   -0.40    1.90
  29   3   2    6.20    2.90
 -29   3  -2    0.50    2.10
  29   3   2    1.70    2.20
  29   3   2    3.40    2.20
 -29   3  -2    3.90    2.00
 -28  -4   2    2.70    2.10
  28  -4  -2   10.90    2.50
  28  -4  -2    7.40    2.20
 -28  -4   2    7.30    2.20
  28  -4  -2   10.40    2.50
 -28  -4   2    9.50    2.70
  28   4  -2   10.10    2.60
  28   4  -2    9.60    2.40
 -28   4   2    8.70    2.20
 -28   4   2    6.40    2.50
 -28   4   2    6.80    2.40
  26  -4  -2    6.20    2.40
 -26  -4   2    1.60    2.20
  26  -4  -2    0.30    1.80
 -26  -4   2   -0.20    1.80
 -26  -4   2    0.40    1.70
  26  -4  -2    0.80    1.70
  26   4  -2    1.80    1.90
 -26   4   2   -1.10    1.70
 -26   4   2   -2.30    1.50
  26   4  -2    4.80    2.70
 -26   4   2    1.30    2.60
 -24  -4   2    0.50    1.10
  24  -4  -2    2.40    1.20
 -24  -4   2    1.00    1.30
  24  -4  -2    0.60    1.60
  24  -4  -2    1.40    1.20
 -24  -4   2    2.80    1.60
  24  -4  -2    7.00    2.40
 -24  -4   2    0.00    1.60
  24   4  -2    2.40    1.70
  24   4  -2    1.50    1.20
 -24   4   2    3.50    1.80
  24   4  -2    3.50    2.50
 -24   4   2    3.50    2.50
 -24   4   2    0.00    1.10
 -24   4   2    1.00    1.10
  22  -4  -2    3.90    1.20
  22  -4  -2    9.20    2.30
 -22  -4   2    3.70    1.90
 -22  -4   2    4.90    1.60
  22  -4  -2    6.00    1.50
 -22  -4   2    5.50    1.40
  22  -4  -2    3.40    1.60
 -22  -4   2    2.00    1.60
  22   4  -2    4.30    1.80
 -22   4   2    2.50    1.50
 -22   4   2    2.80    1.10
 -22   4   2    4.60    2.40
  22   4  -2    2.90    1.50
 -22   4   2    2.50    1.30
  22   4  -2    4.50    1.70
 -20  -4   2   -1.20    0.90
 -20  -4   2   -0.30    1.30
  20  -4  -2   -0.90    1.30
  20  -4  -2    1.20    1.70
  20  -4  -2    0.50    2.10
 -20  -4   2   -0.30    1.20
  20  -4  -2   -0.20    0.80
  20  -4  -2   -0.30    1.20
  20  -4  -2   -0.50    1.20
 -20  -4   2    0.60    1.60
  20   4  -2   -0.60    0.80
 -20   4   2    0.80    0.90
  20   4  -2   -1.00    1.40
 -20   4   2    0.50    1.10
 -20   4   2    0.50    1.90
 -20   4   2    0.00    1.10
 -20   4   2   -1.60    1.20
  20   4  -2   -0.30    0.90
 -18  -4   2   -2.10    1.00
  18  -4  -2   -3.10    1.80
  18  -4  -2   -0.30    1.10
 -18  -4   2   -1.50    1.30
  18  -4  -2    0.40    0.90
 -18  -4   2   -1.50    1.00
 -18  -4   2   -1.70    1.10
  18  -4  -2   -1.70    1.00
  18  -4  -2   -0.90    0.90
  18  -4  -2   -0.70    1.00
 -18   4   2   -1.80    1.00
 -18   4   2   -1.00    0.80
  18   4  -2    0.90    1.10
 -18   4   2   -0.60    1.20
  18   4  -2   -0.40    1.30
 -18   4   2   -1.10    0.90
 -18   4   2   -0.60    0.80
  18   4  -2   -0.30    0.80
 -16  -4   2    0.50    1.10
  16  -4  -2    0.90    1.10
  16  -4  -2    1.60    1.20
  16  -4  -2    3.10    1.10
  16  -4  -2    1.40    2.00
 -16  -4   2    2.80    1.10
 -16  -4   2    3.10    1.60
  16  -4  -2    1.50    0.80
  16  -4  -2    0.60    1.30
 -16  -4   2    0.20    1.30
  16  -4  -2    1.80    1.00
  16   4  -2    2.20    1.00
 -16   4   2    2.80    1.00
 -16   4   2    2.50    1.30
 -16   4   2    1.80    0.90
  16   4  -2    1.70    1.00
 -16   4   2    1.80    1.30
  16   4  -2    1.70    1.30
 -16   4   2    3.00    0.90
 -16   4   2    2.90    1.10
  14  -4  -2   25.10    1.60
  14  -4  -2   23.10    1.80
 -14  -4   2   22.20    1.80
 -14  -4   2   26.90    2.10
  14  -4  -2   22.90    1.60
 -14  -4   2   25.50    2.30
  14  -4  -2   24.20    1.80
  14  -4  -2   26.00    2.00
  14  -4  -2   25.10    2.50
  14  -4  -2   25.20    3.20
 -14  -4   2   26.40    1.90
  14   4  -2   24.90    2.70
 -14   4   2   25.30    1.60
  14   4  -2   26.50    1.80
 -14   4   2   28.10    1.90
 -14   4   2   27.20    1.90
 -14   4   2   25.00    2.60
  14   4  -2   26.10    1.90
 -14   4   2   25.50    1.60
  14   4  -2   27.90    3.90
 -12  -4   2    3.40    0.90
  12  -4  -2    4.40    1.30
  12  -4  -2    3.90    1.00
 -12  -4   2    3.90    1.00
  12  -4  -2    4.80    0.80
  12  -4  -2    2.70    0.80
 -12  -4   2    3.50    1.20
 -12  -4   2    4.50    0.80
  12  -4  -2    2.90    0.90
 -12   4   2    3.80    0.70
  12   4  -2    3.60    2.30
  12   4  -2    5.90    0.80
 -12   4   2    3.80    0.70
 -12   4   2    3.00    1.30
  12   4  -2    3.50    1.20
 -12   4   2    2.70    0.90
 -10  -4   2   18.10    1.30
  10  -4  -2   17.00    2.50
 -10  -4   2   17.50    1.80
  10  -4  -2   19.40    1.40
  10  -4  -2   18.20    1.10
  10  -4  -2   19.30    1.30
  10  -4  -2   18.30    1.60
 -10  -4   2   16.60    1.40
  10  -4  -2   18.60    1.20
 -10  -4   2   17.00    1.20
  10  -4  -2   20.40    1.10
  10   4  -2   19.90    1.20
  10   4  -2   18.80    2.80
 -10   4   2   15.90    1.00
 -10   4   2   17.80    1.10
  10   4  -2   18.20    2.10
  10   4  -2   17.80    1.30
 -10   4   2   15.60    1.10
 -10   4   2   19.00    1.70
  -8  -4   2   73.49    3.00
   8  -4  -2   77.19    2.30
   8  -4  -2   77.39    2.50
  -8  -4   2   74.59    2.50
   8  -4  -2   78.99    2.60
  -8  -4   2   75.79    2.70
   8  -4  -2   82.09    2.90
   8  -4  -2   79.29    3.30
   8  -4  -2   76.19    4.10
   8  -4  -2   77.69    2.30
  -8   4   2   75.59    2.30
   8   4  -2   74.99    3.90
   8   4  -2   77.89    3.30
  -8   4   2   78.49    3.40
   8   4  -2   78.89    2.50
   8   4  -2   76.39    2.40
  -8   4   2   77.69    2.60
  -6  -4   2  969.40   22.50
  -6  -4   2  989.20   22.30
   6  -4  -2  970.40   22.70
   6  -4  -2  970.50   22.00
   6  -4  -2  965.20   23.20
   6  -4  -2  954.50   22.10
  -6  -4   2  963.00   23.00
   6  -4  -2  980.90   21.90
   6  -4  -2  945.31   24.20
   6   4  -2  977.10   22.20
  -6   4   2  943.21   23.20
   6   4  -2  977.20   22.10
   6   4  -2  949.01   22.90
  -6   4   2  962.70   21.90
   6   4  -2  971.30   23.80
  -6   4   2  967.40   22.30
  -4  -4   2  142.19    4.10
  -4  -4   2  143.49    3.80
   4  -4  -2  143.09    3.70
  -4  -4   2  143.19    4.40
   4  -4  -2  142.29    3.60
   4  -4  -2  145.79    5.30
   4  -4  -2  147.79    4.40
   4   4  -2  144.89    3.70
   4   4  -2  141.89    5.00
  -4   4   2  144.39    4.70
   4   4  -2  146.89    3.60
   4   4  -2  143.89    4.30
  -4   4   2  144.09    3.50
  -4   4   2  144.19    3.90
   2  -4  -2  421.26   10.60
   2  -4  -2  418.26    9.70
  -2  -4   2  420.16    9.90
   2  -4  -2  420.36   11.50
   2  -4  -2  416.86    9.70
  -2  -4   2  419.36    9.60
  -2  -4   2  432.76   10.60
  -2  -4   2  414.96   10.10
  -2   4   2  425.86   10.00
   2   4  -2  409.36   11.30
   2   4  -2  401.56   10.30
  -2   4   2  416.56   10.80
   2   4  -2  416.66    9.60
   0  -4   2  438.16   11.60
   0  -4   2  391.16    9.90
   0  -4  -2  444.16   11.60
   0  -4  -2  441.16   11.00
   0  -4  -2  449.56   10.20
   0  -4   2  440.56   10.40
   0  -4   2  446.06   10.20
   0  -4  -2  428.66   10.10
   0  -4   2  445.96   10.90
   0   4  -2  443.86   11.90
   0   4  -2  428.16    9.90
   0   4   2  437.66   11.20
   0   4   2  441.96   10.30
   0   4   2  392.06   10.50
   0   4  -2  439.36   10.60
   2  -4   2    2.80    0.30
  -2  -4  -2    3.30    0.50
  -2  -4  -2    2.40    0.90
   2  -4   2    2.20    0.50
  -2  -4  -2    1.60    0.50
   2  -4   2    2.40    1.20
   2  -4   2    2.00    0.80
  -2  -4  -2    2.80    0.30
  -2  -4  -2    1.40    0.90
   2  -4   2    2.00    0.50
   2   4   2    1.50    1.00
  -2   4  -2    3.20    0.30
   2   4   2    2.50    0.30
  -2   4  -2    1.80    0.30
   2   4   2    2.60    1.20
   2   4   2    1.60    0.60
  -2   4  -2    2.90    1.30
  -2   4  -2    1.80    0.70
   4  -4   2   19.50    1.30
   4  -4   2   17.10    2.00
  -4  -4  -2   17.50    1.50
  -4  -4  -2   18.70    1.10
  -4  -4  -2   20.20    0.80
   4  -4   2   19.40    1.00
   4  -4   2   18.70    1.10
   4  -4   2   21.30    0.80
  -4  -4  -2   18.30    1.10
  -4  -4  -2   19.80    1.60
  -4   4  -2   19.90    0.80
   4   4   2   19.10    0.80
  -4   4  -2   18.80    0.90
   4   4   2   19.30    1.70
   4   4   2   19.20    1.10
  -4   4  -2   17.20    2.10
  -4   4  -2   19.30    1.30
   4   4   2   18.60    1.70
   6  -4   2   54.09    2.40
   6  -4   2   56.09    2.00
   6  -4   2   52.89    3.10
  -6  -4  -2   56.29    1.80
  -6  -4  -2   57.39    2.10
   6  -4   2   53.29    1.90
  -6  -4  -2   55.29    2.40
   6  -4   2   53.69    1.90
   6  -4   2   58.19    1.70
  -6  -4  -2   54.49    2.90
   6  -4   2   57.19    2.30
  -6  -4  -2   56.89    2.00
  -6   4  -2   55.79    1.90
   6   4   2   56.29    3.00
   6   4   2   58.39    1.80
  -6   4  -2   58.09    2.30
   6   4   2   55.49    2.00
  -6   4  -2   53.39    3.20
   6   4   2   59.09    2.50
  -8  -4  -2    2.00    0.50
   8  -4   2    0.90    0.60
   8  -4   2    3.00    1.00
   8  -4   2    0.80    0.70
   8  -4   2    1.10    1.20
  -8  -4  -2    2.00    0.70
  -8  -4  -2    0.50    1.30
   8  -4   2    0.80    0.80
   8  -4   2    2.30    0.50
   8  -4   2    1.80    0.60
  -8  -4  -2    0.90    0.80
   8   4   2    1.00    0.70
  -8   4  -2    1.70    0.60
   8   4   2    1.70    0.90
   8   4   2    2.40    0.60
   8   4   2    1.30    0.60
   8   4   2    2.00    1.40
  -8   4  -2    0.50    1.20
  -8   4  -2    2.20    0.80
  10  -4   2   72.19    2.90
 -10  -4  -2   72.29    3.50
  10  -4   2   75.09    2.50
 -10  -4  -2   70.49    2.70
 -10  -4  -2   76.99    2.50
 -10  -4  -2   75.79    2.80
  10  -4   2   72.59    2.50
  10  -4   2   74.69    2.50
  10  -4   2   73.29    3.00
  10  -4   2   73.59    2.60
  10  -4   2   71.19    3.80
  10   4   2   76.29    2.60
 -10   4  -2   74.79    3.00
  10   4   2   74.79    2.70
 -10   4  -2   75.09    4.00
 -10   4  -2   73.59    2.60
  10   4   2   73.79    2.90
  10   4   2   74.09    2.80
  10   4   2   74.49    3.50
 -12  -4  -2   75.69    3.00
 -12  -4  -2   82.79    2.80
  12  -4   2   80.29    3.50
  12  -4   2   75.99    2.80
  12  -4   2   77.49    2.90
  12  -4   2   78.29    2.80
 -12  -4  -2   80.09    3.20
  12  -4   2   78.19    3.20
  12  -4   2   77.19    4.10
 -12  -4  -2   76.99    4.10
  12  -4   2   80.69    2.80
  12   4   2   75.89    2.90
 -12   4  -2   80.69    3.60
  12   4   2   82.09    2.90
 -12   4  -2   76.79    4.30
  12   4   2   78.79    3.10
 -12   4  -2   80.89    3.00
  12   4   2   75.99    3.70
 -12   4  -2   80.59    3.30
  14  -4   2    1.30    1.30
  14  -4   2    1.70    1.00
 -14  -4  -2   -0.10    0.90
  14  -4   2    1.20    1.50
  14  -4   2    0.20    0.80
  14  -4   2   -0.30    0.80
 -14  -4  -2    1.00    0.80
 -14  -4  -2    0.90    1.40
 -14  -4  -2    0.30    0.90
  14  -4   2    0.80    0.90
  14  -4   2    0.50    1.00
 -14   4  -2    0.30    1.50
 -14   4  -2   -0.10    1.00
 -14   4  -2    0.10    0.90
 -14   4  -2    1.30    0.70
  14   4   2    1.60    1.80
  14   4   2    0.10    0.90
  14   4   2    0.80    0.70
 -14   4  -2    1.50    1.10
  14   4   2    0.90    0.80
 -16  -4  -2   10.40    1.60
  16  -4   2   13.30    1.80
 -16  -4  -2   12.60    1.50
 -16  -4  -2   15.80    1.90
  16  -4   2   13.40    2.60
 -16  -4  -2   12.80    2.60
  16  -4   2   11.90    1.60
  16  -4   2   13.70    1.50
  16  -4   2   14.00    2.20
  16  -4   2   15.50    1.70
  16  -4   2   13.90    1.60
  16   4   2   11.70    1.70
  16   4   2   15.70    2.50
 -16   4  -2   14.50    2.20
  16   4   2   13.80    1.60
 -16   4  -2   13.60    1.60
 -16   4  -2   11.80    1.60
  16   4   2   15.20    1.70
 -16   4  -2   12.10    1.40
 -16   4  -2   15.00    2.60
 -18  -4  -2    0.50    2.10
  18  -4   2    1.80    1.80
  18  -4   2    1.70    3.30
  18  -4   2    3.30    1.30
 -18  -4  -2    1.40    1.20
  18  -4   2    2.40    1.40
 -18  -4  -2    2.20    1.20
  18  -4   2    0.70    1.20
 -18  -4  -2   -0.20    1.30
  18  -4   2    1.60    1.10
  18  -4   2    2.30    1.10
  18   4   2    0.40    1.20
 -18   4  -2    1.60    1.20
 -18   4  -2    2.10    1.70
 -18   4  -2    2.90    2.10
  18   4   2    2.80    1.30
  18   4   2    0.30    2.10
  18   4   2    0.20    1.40
 -18   4  -2    1.80    1.10
 -18   4  -2    2.40    1.10
 -18   4  -2    2.20    1.00
 -20  -4  -2    4.60    1.50
 -20  -4  -2    5.90    2.40
  20  -4   2    2.00    1.30
  20  -4   2    3.20    1.20
  20  -4   2    3.10    1.40
  20  -4   2    3.10    1.30
 -20  -4  -2    2.70    1.20
  20  -4   2    3.20    1.50
 -20  -4  -2    4.00    1.70
  20  -4   2   -0.50    1.90
 -20   4  -2    1.30    2.00
 -20   4  -2   -0.20    1.20
  20   4   2    2.60    1.20
 -20   4  -2    1.00    1.10
  20   4   2    4.80    1.50
  20   4   2    1.90    1.20
 -20   4  -2    3.70    1.40
  20   4   2    2.40    1.70
 -20   4  -2    1.10    0.90
  22  -4   2    2.30    1.60
  22  -4   2    2.50    1.40
  22  -4   2    4.30    1.70
 -22  -4  -2    1.00    1.40
  22  -4   2    2.40    1.50
  22  -4   2    0.40    2.30
 -22  -4  -2    1.00    1.50
 -22  -4  -2    0.30    1.10
  22  -4   2    0.90    1.10
 -22  -4  -2    4.30    2.50
 -22   4  -2    3.00    1.50
 -22   4  -2   -0.20    1.30
  22   4   2    1.90    1.60
 -22   4  -2    1.00    1.10
 -22   4  -2    2.40    1.60
  22   4   2    2.50    1.30
  22   4   2    3.60    1.70
  22   4   2    3.70    2.40
 -22   4  -2    2.90    2.30
  24  -4   2   -0.20    1.60
  24  -4   2    2.50    1.60
  24  -4   2    3.40    1.60
 -24  -4  -2    1.40    1.50
  24  -4   2    1.20    1.70
 -24  -4  -2    2.40    1.30
 -24  -4  -2    1.70    2.10
 -24   4  -2   -0.40    1.50
  24   4   2    2.00    1.80
 -24   4  -2    3.70    1.70
 -24   4  -2    2.70    1.70
  24   4   2    0.70    1.30
  24   4   2    0.70    1.70
 -24   4  -2   -1.10    1.60
  24   4   2    4.10    2.60
  26  -4   2    2.20    1.80
 -26  -4  -2   -0.10    2.20
  26  -4   2   -0.50    1.70
  26  -4   2    0.20    1.90
  26  -4   2    5.30    2.40
 -26  -4  -2   -0.10    1.70
  26   4   2    2.50    2.10
  26   4   2    1.40    1.90
  26   4   2    2.10    2.00
 -26   4  -2   -0.40    1.80
 -26   4  -2   -0.20    1.60
 -26   4  -2   -0.70    1.70
  28  -4   2   -0.90    2.00
  28  -4   2    2.00    2.00
 -28  -4  -2   -1.40    1.90
 -28  -4  -2    2.60    2.50
  28  -4   2    2.00    1.90
 -28   4  -2    2.90    2.00
  28   4   2    5.10    2.30
  28   4   2    2.50    2.20
 -28   4  -2    2.60    1.90
  28   4   2    3.90    2.20
 -28   4  -2   -0.90    1.80
  27  -5  -2    3.40    1.80
  27  -5  -2    4.10    2.00
  27  -5  -2    1.90    1.60
 -27  -5   2    2.80    2.20
 -27  -5   2   -0.50    2.30
 -27  -5   2    0.90    1.40
 -27   5   2    1.00    2.00
  27   5  -2    8.00    3.10
 -27   5   2   -0.20    1.40
 -27   5   2    1.60    1.30
  27   5  -2    2.20    1.50
 -25  -5   2    5.00    1.60
  25  -5  -2   12.10    2.70
  25  -5  -2    6.50    2.10
  25  -5  -2    5.10    1.70
  25  -5  -2    4.50    1.80
 -25  -5   2    6.80    2.40
 -25  -5   2    6.00    2.00
 -25   5   2    9.80    2.60
 -25   5   2    5.80    1.80
  25   5  -2    8.40    2.10
 -25   5   2    6.90    2.10
 -25   5   2    7.20    1.90
  25   5  -2   12.50    3.10
 -23  -5   2   14.60    2.50
 -23  -5   2   11.50    1.90
  23  -5  -2    9.80    1.60
  23  -5  -2   10.60    1.80
  23  -5  -2   13.00    2.20
 -23  -5   2   12.80    2.00
 -23  -5   2   10.70    2.10
  23  -5  -2   11.90    2.30
  23   5  -2   12.10    2.50
 -23   5   2    8.80    2.00
 -23   5   2   12.50    2.60
 -23   5   2   10.00    1.80
  23   5  -2   12.70    2.10
  23   5  -2   13.40    2.00
 -23   5   2   13.40    1.90
  21  -5  -2   13.70    2.10
 -21  -5   2   12.60    1.90
  21  -5  -2   12.90    1.90
 -21  -5   2   12.30    1.90
  21  -5  -2   15.50    3.30
  21  -5  -2   18.00    2.80
 -21  -5   2   14.40    2.30
 -21  -5   2   12.40    2.10
  21  -5  -2   14.40    1.80
 -21   5   2   13.10    2.10
  21   5  -2   14.40    2.50
 -21   5   2   13.10    1.70
  21   5  -2   15.90    2.10
 -21   5   2   13.30    1.90
 -21   5   2   16.70    3.00
  21   5  -2   13.40    1.90
  19  -5  -2   10.50    2.20
 -19  -5   2    7.00    1.40
  19  -5  -2    9.20    2.90
  19  -5  -2    7.70    1.60
 -19  -5   2   11.20    2.00
  19  -5  -2    6.90    1.50
 -19  -5   2    7.50    1.70
  19  -5  -2    6.00    1.30
  19   5  -2    8.90    1.40
 -19   5   2    5.50    1.40
  19   5  -2    6.10    1.90
 -19   5   2    7.50    2.20
  19   5  -2    7.30    1.60
 -19   5   2    6.10    1.30
 -19   5   2    6.40    1.60
 -17  -5   2    1.00    1.50
 -17  -5   2    1.40    1.20
 -17  -5   2    1.80    1.20
  17  -5  -2   -0.50    2.10
  17  -5  -2    1.30    0.90
  17  -5  -2    0.70    1.00
 -17  -5   2    0.50    1.00
  17  -5  -2    1.90    0.90
  17  -5  -2    1.00    1.60
  17   5  -2   -0.50    0.90
  17   5  -2    2.40    1.90
 -17   5   2    0.70    1.10
 -17   5   2   -0.90    1.60
 -17   5   2    0.70    0.80
 -17   5   2    1.50    0.90
 -17   5   2    0.80    0.80
  17   5  -2    1.20    1.10
  15  -5  -2   46.20    2.50
  15  -5  -2   51.19    2.30
  15  -5  -2   51.79    2.30
  15  -5  -2   48.90    3.40
 -15  -5   2   49.90    2.60
  15  -5  -2   50.69    2.60
 -15  -5   2   50.59    2.60
  15  -5  -2   49.80    4.00
 -15  -5   2   52.09    3.30
  15  -5  -2   53.39    3.00
 -15  -5   2   47.70    2.60
 -15   5   2   50.29    3.60
 -15   5   2   53.19    2.80
  15   5  -2   53.39    3.70
  15   5  -2   53.89    2.50
  15   5  -2   50.19    2.60
 -15   5   2   51.29    2.30
 -15   5   2   50.09    2.30
 -15   5   2   52.29    2.60
 -15   5   2   50.59    2.50
 -13  -5   2  220.68    6.20
  13  -5  -2  214.98    7.10
  13  -5  -2  225.98    8.60
  13  -5  -2  214.58    5.90
  13  -5  -2  219.48    6.30
 -13  -5   2  226.38    6.30
 -13  -5   2  218.88    6.50
  13  -5  -2  217.78    6.50
  13  -5  -2  224.98    6.20
 -13  -5   2  219.48    7.00
  13  -5  -2  224.98    5.90
  13   5  -2  220.08    8.10
 -13   5   2  211.38    6.10
  13   5  -2  230.48    7.30
  13   5  -2  217.78    6.20
 -13   5   2  214.38    5.80
 -13   5   2  224.08    5.90
  13   5  -2  224.58    6.10
 -13   5   2  204.98    7.10
 -13   5   2  212.68    6.20
  11  -5  -2   94.99    2.90
 -11  -5   2   92.29    3.40
  11  -5  -2   92.69    3.10
  11  -5  -2   97.29    2.90
  11  -5  -2   93.19    4.10
 -11  -5   2   88.89    3.80
  11  -5  -2   91.39    4.90
 -11  -5   2   97.09    3.20
 -11  -5   2   92.59    3.10
  11  -5  -2   97.39    3.30
  11  -5  -2   93.29    3.50
  11   5  -2   94.19    3.20
 -11   5   2   95.09    2.90
  11   5  -2   95.69    5.30
 -11   5   2   92.09    2.80
  11   5  -2   94.59    3.10
 -11   5   2   94.79    4.20
 -11   5   2   97.09    3.30
  11   5  -2   90.89    3.90
   9  -5  -2   54.99    2.20
  -9  -5   2   52.49    2.80
   9  -5  -2   52.29    2.80
   9  -5  -2   51.69    3.50
   9  -5  -2   51.49    2.00
  -9  -5   2   54.49    2.10
  -9  -5   2   53.19    2.00
   9  -5  -2   55.49    2.50
   9  -5  -2   51.69    1.80
   9  -5  -2   51.79    1.80
  -9  -5   2   51.69    2.50
  -9   5   2   52.89    2.10
  -9   5   2   50.39    2.80
   9   5  -2   53.29    2.00
   9   5  -2   53.79    2.00
   9   5  -2   55.89    3.10
  -9   5   2   55.09    1.80
   9   5  -2   58.09    4.10
   7  -5  -2  343.77    9.80
  -7  -5   2  354.96    9.60
  -7  -5   2  357.56    8.70
   7  -5  -2  356.86    9.30
   7  -5  -2  350.96   10.90
  -7  -5   2  358.26    8.60
   7  -5  -2  351.66    8.60
  -7  -5   2  340.77    9.00
   7  -5  -2  352.86    8.30
   7  -5  -2  349.96    8.40
  -7   5   2  346.27    9.90
   7   5  -2  360.36   10.50
   7   5  -2  357.36    8.50
  -7   5   2  359.66    8.80
   7   5  -2  355.76    8.60
  -7   5   2  343.97    8.30
   7   5  -2  353.06    9.60
   5  -5  -2  110.39    3.10
   5  -5  -2  115.99    5.10
  -5  -5   2  113.69    3.60
  -5  -5   2  112.59    4.10
   5  -5  -2  117.79    3.10
  -5  -5   2  114.89    3.30
   5  -5  -2  112.29    3.90
   5   5  -2  121.29    4.10
   5   5  -2  118.39    3.10
  -5   5   2  113.79    2.80
   5   5  -2  112.79    4.70
  -5   5   2  109.29    4.30
   5   5  -2  118.49    3.00
  -5   5   2  117.29    3.40
  -3  -5   2  185.18    4.70
  -3  -5   2  186.08    4.50
   3  -5  -2  183.88    4.60
   3  -5  -2  176.88    5.50
  -3  -5   2  174.98    5.00
   3  -5  -2  174.68    4.40
   3  -5  -2  179.58    6.40
  -3  -5   2  171.08    5.50
   3   5  -2  181.88    6.40
   3   5  -2  183.28    4.30
   3   5  -2  177.38    5.40
  -3   5   2  180.38    4.80
  -3   5   2  178.48    5.70
   3   5  -2  184.08    4.40
  -1  -5   2  465.85   12.70
   1  -5  -2  482.05   11.00
  -1  -5   2  491.25   12.00
  -1  -5   2  483.05   11.00
   1  -5  -2  468.45   12.90
   1  -5  -2  459.35   12.00
  -1  -5   2  462.95   11.30
   1  -5  -2  470.65   10.80
  -1   5   2  414.76   11.20
  -1   5   2  458.85   12.90
  -1   5   2  463.75   12.30
   1   5  -2  452.25   12.90
   1   5  -2  469.25   11.70
   1   5  -2  497.85   10.90
  -1   5   2  465.35   11.10
   1  -5   2   17.50    2.20
  -1  -5  -2   11.90    0.80
   1  -5   2   15.10    1.20
  -1  -5  -2   15.50    1.00
  -1  -5  -2   14.70    1.70
   1  -5   2   14.50    1.40
  -1  -5  -2   15.90    1.90
   1  -5   2   12.40    0.90
  -1   5  -2   14.00    1.90
   1   5   2   13.20    1.10
  -1   5  -2   13.60    0.50
  -1   5  -2   12.70    1.40
   1   5   2   15.10    2.00
   1   5   2   14.80    2.00
  -1   5  -2   11.90    0.50
   3  -5   2 1113.29   25.60
   3  -5   2 1099.89   27.40
  -3  -5  -2 1121.39   25.60
   3  -5   2 1136.49   26.30
  -3  -5  -2 1127.09   26.70
  -3  -5  -2 1145.29   25.10
  -3  -5  -2 1100.99   25.30
  -3  -5  -2 1089.49   26.80
   3  -5   2 1104.59   25.30
   3   5   2 1109.29   26.80
   3   5   2 1123.69   27.10
  -3   5  -2 1084.19   25.80
  -3   5  -2 1104.99   27.60
  -3   5  -2 1075.19   25.90
  -3   5  -2 1119.19   25.10
   3   5   2 1106.09   25.50
  -5  -5  -2  657.43   16.50
   5  -5   2  624.94   15.90
  -5  -5  -2  638.04   16.20
   5  -5   2  631.94   15.30
  -5  -5  -2  653.33   15.40
  -5  -5  -2  653.33   14.90
   5  -5   2  666.33   14.80
  -5  -5  -2  651.53   15.10
   5  -5   2  633.74   15.00
   5  -5   2  638.74   17.10
   5   5   2  632.04   15.20
  -5   5  -2  642.14   17.40
   5   5   2  660.83   16.50
   5   5   2  651.33   14.90
  -5   5  -2  655.83   15.00
   5   5   2  659.23   16.60
  -5   5  -2  642.84   15.70
  -5   5  -2  641.34   14.80
  -7  -5  -2  161.38    4.20
   7  -5   2  153.88    4.80
  -7  -5  -2  158.38    5.10
  -7  -5  -2  157.08    4.40
   7  -5   2  157.68    4.30
   7  -5   2  162.88    4.10
   7  -5   2  158.18    4.20
   7  -5   2  152.38    4.40
   7  -5   2  151.88    5.00
  -7  -5  -2  152.38    5.40
   7  -5   2  152.88    5.90
  -7  -5  -2  158.48    4.60
   7   5   2  159.08    5.30
  -7   5  -2  161.58    4.30
  -7   5  -2  161.08    6.40
  -7   5  -2  155.98    4.90
   7   5   2  155.38    5.50
   7   5   2  159.98    4.40
   7   5   2  163.68    4.20
  -7   5  -2  156.68    4.10
   9  -5   2   60.49    3.60
   9  -5   2   60.09    2.20
  -9  -5  -2   61.09    3.50
   9  -5   2   59.69    2.30
   9  -5   2   61.49    2.70
  -9  -5  -2   57.89    2.40
  -9  -5  -2   62.19    2.20
   9  -5   2   61.79    2.20
  -9  -5  -2   62.19    2.60
   9  -5   2   62.99    3.00
   9  -5   2   62.59    2.10
  -9   5  -2   60.09    2.10
   9   5   2   62.39    2.40
   9   5   2   60.99    3.00
   9   5   2   61.09    2.40
   9   5   2   58.69    3.30
   9   5   2   61.69    2.20
  -9   5  -2   58.59    3.70
  -9   5  -2   61.19    2.30
  -9   5  -2   62.39    2.70
 -11  -5  -2  156.58    4.80
 -11  -5  -2  161.68    4.60
  11  -5   2  158.08    4.50
  11  -5   2  153.68    5.20
 -11  -5  -2  156.08    4.90
  11  -5   2  156.78    4.70
  11  -5   2  159.58    4.70
  11  -5   2  162.08    6.50
 -11  -5  -2  156.38    5.90
  11  -5   2  158.18    4.50
  11  -5   2  160.48    5.40
  11   5   2  163.68    4.60
  11   5   2  151.58    5.80
 -11   5  -2  158.68    4.70
 -11   5  -2  159.68    5.30
  11   5   2  157.88    4.80
  11   5   2  169.58    4.80
 -11   5  -2  159.78    6.70
 -11   5  -2  158.98    4.50
  13  -5   2   56.19    3.70
 -13  -5  -2   59.89    2.70
  13  -5   2   62.19    2.60
  13  -5   2   59.79    2.70
  13  -5   2   59.59    3.30
  13  -5   2   53.49    2.40
  13  -5   2   61.99    2.50
 -13  -5  -2   59.09    2.50
 -13  -5  -2   57.39    4.00
  13  -5   2   52.89    2.90
 -13  -5  -2   58.09    2.80
 -13   5  -2   61.99    4.30
  13   5   2   57.09    2.50
  13   5   2   62.89    4.10
 -13   5  -2   62.49    3.10
 -13   5  -2   61.19    2.40
 -13   5  -2   59.69    3.40
  13   5   2   62.29    2.70
  13   5   2   58.29    2.70
 -13   5  -2   54.59    2.70
  15  -5   2    6.60    2.20
 -15  -5  -2    4.70    1.00
  15  -5   2    7.20    1.20
  15  -5   2    5.30    1.30
  15  -5   2    6.50    1.80
  15  -5   2    5.20    1.10
  15  -5   2    5.20    1.50
  15  -5   2    6.40    1.20
 -15  -5  -2    5.50    1.90
 -15  -5  -2    6.30    1.70
 -15  -5  -2    5.80    1.40
  15   5   2    4.80    1.20
 -15   5  -2    6.00    1.30
 -15   5  -2    6.50    1.00
 -15   5  -2    5.90    1.10
  15   5   2    6.60    1.90
  15   5   2    7.20    1.20
  15   5   2    6.40    1.10
 -15   5  -2    5.70    2.20
 -15   5  -2    4.00    1.20
 -15   5  -2    5.10    1.50
 -15   5  -2    5.60    1.80
  17  -5   2   45.30    4.00
  17  -5   2   44.20    3.10
  17  -5   2   43.30    3.30
 -17  -5  -2   39.50    2.80
 -17  -5  -2   43.00    3.00
 -17  -5  -2   40.40    2.50
  17  -5   2   42.60    2.40
  17  -5   2   40.10    2.40
  17  -5   2   42.90    2.60
 -17  -5  -2   43.70    4.00
  17  -5   2   42.30    2.60
  17   5   2   41.80    2.60
 -17   5  -2   42.90    4.00
  17   5   2   46.50    2.80
 -17   5  -2   44.30    3.40
 -17   5  -2   43.00    3.20
 -17   5  -2   41.40    2.60
 -17   5  -2   41.50    2.70
 -17   5  -2   40.90    2.40
  17   5   2   41.10    3.40
 -17   5  -2   48.50    2.50
  17   5   2   40.70    2.70
 -19  -5  -2   50.99    4.40
 -19  -5  -2   48.50    2.90
  19  -5   2   49.50    2.80
  19  -5   2   45.50    3.30
 -19  -5  -2   45.60    3.10
 -19  -5  -2   44.20    3.30
  19  -5   2   49.30    2.80
  19  -5   2   42.50    3.70
  19  -5   2   45.20    2.90
  19  -5   2   42.40    2.80
 -19   5  -2   42.30    2.70
 -19   5  -2   48.00    3.90
 -19   5  -2   44.00    4.80
  19   5   2   45.00    3.10
  19   5   2   51.59    3.00
 -19   5  -2   49.80    3.90
 -19   5  -2   43.20    2.90
  19   5   2   42.50    3.60
 -19   5  -2   45.40    2.70
 -19   5  -2   48.10    2.90
  19   5   2   49.70    3.10
  21  -5   2    4.30    1.80
 -21  -5  -2    5.50    2.60
  21  -5   2    2.20    1.40
  21  -5   2    2.90    1.10
 -21  -5  -2    1.80    1.50
  21  -5   2    2.40    1.60
  21  -5   2   -0.10    2.20
 -21  -5  -2    1.90    1.90
 -21  -5  -2    2.10    1.50
  21  -5   2    3.60    1.40
 -21   5  -2    4.30    1.50
  21   5   2    2.90    2.50
 -21   5  -2    5.60    1.50
  21   5   2   -0.70    1.40
 -21   5  -2    3.90    1.60
 -21   5  -2    3.60    1.40
  21   5   2    3.40    1.60
  21   5   2    2.70    1.70
 -21   5  -2    5.30    2.00
 -21   5  -2    4.00    2.30
 -23  -5  -2   16.00    2.30
 -23  -5  -2   15.60    2.20
 -23  -5  -2   13.60    2.20
  23  -5   2   12.60    2.10
  23  -5   2   15.40    2.20
  23  -5   2   16.20    1.90
  23  -5   2   16.90    2.20
 -23   5  -2   17.70    2.20
 -23   5  -2   15.10    2.10
  23   5   2   10.80    2.10
  23   5   2   15.90    3.20
  23   5   2   16.70    2.40
 -23   5  -2   15.10    2.10
  23   5   2   18.50    2.40
 -23   5  -2   16.30    2.20
  25  -5   2   11.30    2.20
 -25  -5  -2   10.00    2.20
  25  -5   2    8.20    2.00
  25  -5   2   15.40    2.20
 -25  -5  -2   16.20    2.90
  25  -5   2   11.70    2.10
 -25   5  -2   16.70    2.40
 -25   5  -2    9.50    1.80
  25   5   2   13.70    2.40
  25   5   2   13.10    2.80
  25   5   2   14.50    2.40
  27  -5   2    4.40    2.00
  27  -5   2    4.40    1.90
 -27  -5  -2    2.50    2.00
 -27  -5  -2    1.60    1.80
  27   5   2    4.90    3.10
 -27   5  -2    2.90    1.50
 -27   5  -2    2.80    1.90
  27   5   2    5.00    2.10
  27   5   2    3.70    2.20
  28  -6  -2    8.10    2.80
 -26  -6   2   -2.20    2.30
  26  -6  -2   -0.70    1.60
 -26  -6   2   -1.40    1.30
 -26  -6   2    2.40    1.80
  26  -6  -2    3.00    2.40
  26   6  -2    3.90    2.90
 -26   6   2   -2.30    2.50
  26   6  -2    3.50    2.00
 -26   6   2    0.20    1.70
 -24  -6   2    2.50    2.30
  24  -6  -2    8.30    2.60
  24  -6  -2    2.50    1.90
 -24  -6   2    2.00    1.90
  24  -6  -2    1.90    1.70
 -24  -6   2    4.30    1.60
 -24  -6   2    1.10    1.60
  24   6  -2    7.60    2.90
  24   6  -2    2.70    1.50
 -24   6   2    3.70    2.70
  24   6  -2    4.90    1.80
 -24   6   2    1.80    1.70
 -24   6   2    2.80    1.20
  22  -6  -2   -0.10    2.00
 -22  -6   2    0.30    1.30
  22  -6  -2    1.30    1.50
  22  -6  -2    2.10    2.70
 -22  -6   2    3.60    2.10
  22  -6  -2    1.40    1.40
 -22  -6   2    0.30    1.30
 -22  -6   2   -0.60    1.50
  22   6  -2   -1.40    1.20
 -22   6   2   -0.70    2.10
  22   6  -2   -0.10    2.40
 -22   6   2   -0.50    1.40
  22   6  -2    1.10    1.40
 -22   6   2   -0.30    1.20
 -22   6   2    2.30    2.40
  20  -6  -2    1.60    1.90
  20  -6  -2   -0.40    0.90
 -20  -6   2    1.70    1.30
 -20  -6   2    1.60    1.40
  20  -6  -2    0.90    2.70
  20  -6  -2   -2.20    1.10
 -20  -6   2   -0.90    1.40
 -20  -6   2    0.00    1.20
  20   6  -2   -1.10    1.60
 -20   6   2    0.80    2.10
 -20   6   2   -1.10    1.10
  20   6  -2    0.20    1.20
 -20   6   2   -0.50    1.20
  20   6  -2    0.50    1.20
 -20   6   2    2.70    2.50
 -18  -6   2   15.40    1.80
  18  -6  -2   18.70    2.70
  18  -6  -2   15.80    1.90
 -18  -6   2   15.40    2.20
 -18  -6   2   23.60    2.80
  18  -6  -2   18.30    3.80
 -18  -6   2   15.90    1.90
  18  -6  -2   18.60    2.10
 -18   6   2   16.20    1.90
  18   6  -2   16.20    1.80
  18   6  -2   16.50    2.40
 -18   6   2   20.50    2.90
 -18   6   2   13.00    1.60
  18   6  -2   14.50    1.80
  16  -6  -2   13.90    2.90
 -16  -6   2   13.10    1.70
 -16  -6   2   12.20    1.50
  16  -6  -2   14.90    2.10
 -16  -6   2   14.20    2.20
  16  -6  -2   13.10    1.60
  16  -6  -2   13.80    2.30
 -16  -6   2   14.80    2.10
  16  -6  -2   13.20    1.50
 -16   6   2   14.30    1.70
  16   6  -2   15.00    1.60
 -16   6   2   15.20    2.40
  16   6  -2   13.10    1.50
 -16   6   2   12.40    1.50
  16   6  -2   13.30    2.60
 -16   6   2   15.80    1.70
 -14  -6   2   29.70    2.20
  14  -6  -2   29.30    2.10
 -14  -6   2   31.70    2.00
  14  -6  -2   27.00    3.00
  14  -6  -2   33.30    2.20
 -14  -6   2   30.10    2.60
  14  -6  -2   30.30    1.90
 -14  -6   2   31.20    2.90
  14  -6  -2   33.60    2.60
  14  -6  -2   31.30    4.10
 -14   6   2   29.30    2.10
 -14   6   2   28.20    3.10
  14   6  -2   30.90    2.80
  14   6  -2   32.10    2.00
 -14   6   2   29.90    1.80
 -14   6   2   29.70    2.10
  14   6  -2   27.60    2.00
 -12  -6   2  103.29    4.00
 -12  -6   2  114.39    3.80
  12  -6  -2  107.59    5.80
  12  -6  -2  113.39    3.90
  12  -6  -2  108.79    4.70
  12  -6  -2  109.49    3.40
 -12  -6   2  113.89    3.70
 -12  -6   2  111.29    4.70
  12  -6  -2  117.59    3.80
  12  -6  -2  114.59    4.30
  12  -6  -2  114.79    3.70
 -12   6   2  103.99    4.70
 -12   6   2  122.99    3.80
  12   6  -2  109.49    3.70
  12   6  -2  115.39    6.20
 -12   6   2  112.39    3.80
  12   6  -2  122.19    5.10
 -12   6   2  107.59    3.40
 -12   6   2  109.89    3.40
  12   6  -2  114.29    3.60
 -10  -6   2   -0.10    0.60
  10  -6  -2    0.40    0.60
 -10  -6   2   -2.30    1.00
  10  -6  -2    0.00    0.60
 -10  -6   2   -0.70    1.20
  10  -6  -2   -0.50    0.70
  10  -6  -2   -1.30    0.80
 -10  -6   2    0.30    0.80
  10  -6  -2   -1.80    0.50
  10  -6  -2    0.10    1.40
  10  -6  -2   -1.40    1.00
  10   6  -2   -0.40    1.10
  10   6  -2    0.50    2.20
 -10   6   2    0.20    0.50
  10   6  -2   -0.50    0.60
 -10   6   2    0.50    0.70
 -10   6   2    0.00    1.00
  10   6  -2   -0.30    0.60
   8  -6  -2   87.89    2.70
   8  -6  -2   86.19    2.70
  -8  -6   2   88.49    3.90
  -8  -6   2   82.29    3.20
   8  -6  -2   88.69    4.00
   8  -6  -2   84.79    3.40
   8  -6  -2   86.99    5.00
  -8  -6   2   88.59    2.90
  -8  -6   2   85.39    2.80
  -8   6   2   90.79    2.70
  -8   6   2   90.79    4.20
   8   6  -2   92.59    4.90
   8   6  -2   90.09    2.70
   8   6  -2   87.59    4.10
  -8   6   2   91.89    3.00
   8   6  -2   88.19    2.80
   6  -6  -2  112.59    3.10
  -6  -6   2  110.99    3.30
   6  -6  -2  112.49    4.10
   6  -6  -2  110.19    5.20
   6  -6  -2  108.69    3.10
  -6  -6   2  109.89    3.10
  -6  -6   2  109.79    3.70
  -6  -6   2  112.09    4.40
   6   6  -2  110.49    3.00
  -6   6   2  109.89    3.40
  -6   6   2  108.99    4.60
   6   6  -2  113.09    5.20
   6   6  -2  110.79    3.10
   6   6  -2  111.39    4.40
  -4  -6   2    5.40    0.90
  -4  -6   2    4.90    0.50
  -4  -6   2    3.30    1.10
   4  -6  -2    2.80    1.80
   4  -6  -2    3.60    0.50
  -4  -6   2    5.60    0.70
   4  -6  -2    5.20    0.70
   4  -6  -2    5.30    1.30
  -4   6   2    4.60    1.50
  -4   6   2    2.80    1.80
   4   6  -2    6.60    1.70
  -4   6   2    6.10    0.80
   4   6  -2    6.30    1.40
   4   6  -2    4.70    0.50
   4   6  -2    5.10    0.50
   2  -6  -2   31.20    2.20
  -2  -6   2   36.50    2.90
  -2  -6   2   32.40    0.90
   2  -6  -2   35.30    2.70
   2  -6  -2   30.80    1.10
  -2  -6   2   32.20    1.40
  -2  -6   2   30.90    2.30
   2  -6  -2   30.50    1.40
  -2  -6   2   30.40    1.80
  -2   6   2   26.00    1.50
  -2   6   2   34.40    2.70
  -2   6   2   30.80    2.30
  -2   6   2   35.10    1.50
   2   6  -2   34.80    3.10
   2   6  -2   33.50    2.20
   2   6  -2   34.10    0.90
   0  -6   2   21.80    2.00
   0  -6  -2   23.80    2.50
   0  -6   2   22.60    2.30
   0  -6  -2   23.50    1.30
   0  -6  -2   21.30    0.90
   0  -6   2   23.10    1.50
   0  -6   2   22.10    1.10
   0  -6  -2   19.80    2.00
   0   6  -2   22.60    1.90
   0   6   2   22.00    2.50
   0   6  -2   21.70    2.40
   0   6   2   22.80    0.90
   0   6   2   24.10    2.10
   0   6   2   24.10    1.30
  -2  -6  -2   17.20    0.90
  -2  -6  -2   17.30    1.20
  -2  -6  -2   14.20    2.10
   2  -6   2   16.40    1.60
   2  -6   2   15.60    2.60
   2  -6   2   14.40    1.30
   2  -6   2   17.00    0.90
  -2  -6  -2   15.40    1.90
   2   6   2   12.20    2.20
   2   6   2   17.00    1.90
  -2   6  -2   14.00    2.60
  -2   6  -2   15.40    1.80
   2   6   2   16.20    1.10
  -4  -6  -2    8.30    1.60
   4  -6   2    7.90    0.80
  -4  -6  -2    6.70    0.70
  -4  -6  -2    9.00    0.70
  -4  -6  -2    7.60    1.40
  -4  -6  -2    8.30    1.00
   4  -6   2    7.50    2.00
   4  -6   2    9.30    1.10
   4  -6   2    8.30    1.40
  -4   6  -2    7.20    0.60
  -4   6  -2    9.50    0.70
   4   6   2    8.20    0.90
   4   6   2    7.60    1.70
  -4   6  -2    9.00    0.60
  -4   6  -2    7.30    1.20
  -4   6  -2    8.50    2.20
   4   6   2    5.40    1.70
   6  -6   2    1.50    0.60
   6  -6   2    2.10    1.70
  -6  -6  -2    1.10    1.00
  -6  -6  -2    2.00    0.90
   6  -6   2    1.70    0.80
  -6  -6  -2    2.30    0.50
   6  -6   2    2.70    1.20
  -6  -6  -2    2.30    0.60
   6  -6   2    1.80    0.40
  -6  -6  -2    3.00    1.40
  -6   6  -2    1.20    1.40
   6   6   2    3.50    1.50
   6   6   2    1.90    0.70
  -6   6  -2    1.30    0.40
   6   6   2    2.70    0.60
  -6   6  -2    2.30    1.10
   6   6   2    2.60    1.70
  -6   6  -2    1.50    0.50
  -8  -6  -2   12.50    2.00
  -8  -6  -2   14.10    1.10
   8  -6   2   12.80    1.80
  -8  -6  -2   12.10    1.40
   8  -6   2   14.70    1.30
   8  -6   2   12.10    1.50
  -8  -6  -2   10.30    1.10
   8  -6   2   13.20    1.10
   8  -6   2   12.70    0.90
   8  -6   2   13.20    2.50
  -8  -6  -2   12.80    1.90
   8   6   2   12.00    1.20
   8   6   2   15.10    2.20
  -8   6  -2   12.50    1.60
  -8   6  -2   11.50    1.20
   8   6   2   14.30    1.10
  -8   6  -2   14.10    1.00
   8   6   2   17.10    2.40
  -8   6  -2   13.40    2.60
  10  -6   2   28.80    1.80
  10  -6   2   27.10    3.30
 -10  -6  -2   26.50    2.50
  10  -6   2   26.60    1.50
 -10  -6  -2   27.00    1.80
  10  -6   2   28.00    2.10
 -10  -6  -2   26.30    1.70
  10  -6   2   27.50    2.10
  10  -6   2   24.80    1.60
 -10  -6  -2   28.50    1.50
  10  -6   2   27.20    1.50
 -10   6  -2   28.10    1.60
  10   6   2   26.30    3.30
  10   6   2   26.10    1.70
 -10   6  -2   28.30    3.40
 -10   6  -2   26.40    2.10
 -10   6  -2   28.70    1.50
  10   6   2   25.20    1.50
  12  -6   2   56.89    3.30
  12  -6   2   55.69    2.30
 -12  -6  -2   47.10    2.80
  12  -6   2   49.60    2.20
 -12  -6  -2   53.89    2.50
 -12  -6  -2   50.19    3.90
  12  -6   2   55.99    2.50
  12  -6   2   52.89    2.30
 -12  -6  -2   49.90    2.30
  12  -6   2   57.09    4.30
  12  -6   2   49.90    2.90
 -12   6  -2   51.69    2.40
 -12   6  -2   57.69    4.50
 -12   6  -2   50.39    2.90
  12   6   2   48.90    2.30
  12   6   2   49.99    2.50
  12   6   2   56.39    2.50
  12   6   2   60.49    4.20
 -12   6  -2   51.29    2.20
  14  -6   2   74.79    3.80
  14  -6   2   78.29    5.10
  14  -6   2   74.09    3.10
  14  -6   2   77.89    3.00
 -14  -6  -2   77.99    3.70
  14  -6   2   79.39    4.00
 -14  -6  -2   76.59    3.30
 -14  -6  -2   78.09    3.10
 -14  -6  -2   80.19    4.80
  14  -6   2   73.19    2.90
  14  -6   2   78.39    3.20
  14   6   2   74.69    3.30
 -14   6  -2   81.09    4.00
  14   6   2   72.99    3.10
  14   6   2   76.59    4.40
 -14   6  -2   81.49    5.30
 -14   6  -2   80.49    4.20
 -14   6  -2   78.19    3.20
 -14   6  -2   80.59    3.00
  14   6   2   76.49    3.10
  16  -6   2    2.00    1.80
 -16  -6  -2    2.40    1.50
  16  -6   2    0.40    0.90
  16  -6   2    1.20    1.10
 -16  -6  -2    0.50    1.20
  16  -6   2    3.20    2.30
  16  -6   2    2.10    1.10
 -16  -6  -2    3.40    1.20
 -16  -6  -2    3.40    2.30
  16  -6   2    0.60    1.30
  16  -6   2    0.00    1.20
 -16   6  -2    1.20    2.30
  16   6   2    1.70    1.20
 -16   6  -2   -0.40    1.10
  16   6   2    2.30    1.20
 -16   6  -2    0.90    1.40
 -16   6  -2    0.40    0.90
 -16   6  -2    2.00    1.70
  16   6   2    1.70    1.90
 -16   6  -2    3.20    1.20
 -16   6  -2    0.70    0.90
  16   6   2    0.60    1.30
  18  -6   2   43.60    2.50
 -18  -6  -2   47.80    2.80
 -18  -6  -2   50.39    4.40
  18  -6   2   44.80    3.70
  18  -6   2   45.80    4.50
  18  -6   2   40.60    3.50
  18  -6   2   43.70    2.80
 -18  -6  -2   41.60    2.90
  18  -6   2   45.20    2.90
  18  -6   2   47.20    2.60
 -18  -6  -2   45.70    3.40
  18   6   2   42.90    3.00
 -18   6  -2   38.80    2.20
  18   6   2   39.60    3.70
 -18   6  -2   44.80    2.80
 -18   6  -2   45.70    2.80
 -18   6  -2   49.40    2.70
 -18   6  -2   45.70    4.60
  18   6   2   49.60    2.90
  18   6   2   51.89    3.00
 -18   6  -2   45.70    3.80
 -18   6  -2   39.80    3.40
 -20  -6  -2    4.70    1.50
 -20  -6  -2    3.10    1.50
 -20  -6  -2    2.70    1.90
  20  -6   2    2.30    1.40
  20  -6   2    2.90    1.60
  20  -6   2    4.70    1.40
  20  -6   2    4.00    1.30
  20  -6   2    0.70    2.10
 -20  -6  -2    7.90    2.60
  20   6   2    6.30    1.70
 -20   6  -2    2.80    1.50
 -20   6  -2    2.30    1.70
  20   6   2    3.30    2.60
 -20   6  -2    4.20    1.50
  20   6   2    1.50    1.40
  20   6   2    3.20    1.50
 -20   6  -2    2.50    1.30
 -20   6  -2    1.80    1.20
  22  -6   2    6.00    1.60
 -22  -6  -2    5.20    2.20
 -22  -6  -2    3.60    1.70
  22  -6   2    5.20    1.80
 -22  -6  -2    4.80    1.40
  22  -6   2    4.50    1.60
  22   6   2    6.80    2.30
  22   6   2    9.00    2.00
  22   6   2    2.30    1.70
  22   6   2    4.40    1.40
 -22   6  -2    5.50    1.60
 -22   6  -2    2.60    1.60
 -22   6  -2    3.90    1.50
 -22   6  -2    6.10    2.00
 -24  -6  -2    2.20    2.20
 -24  -6  -2   12.10    3.50
 -24  -6  -2    3.50    1.40
  24  -6   2    5.10    1.70
 -24   6  -2    0.60    2.00
  24   6   2    4.50    1.50
  24   6   2    5.30    2.00
 -24   6  -2    5.70    2.80
 -24   6  -2    2.70    1.60
  24   6   2    5.40    2.90
 -26  -6  -2   -0.40    2.30
 -26  -6  -2    2.70    1.90
  26  -6   2    1.00    1.90
 -26   6  -2    0.70    1.20
  26   6   2    0.00    1.90
  26   6   2    2.30    2.90
  26   6   2    0.90    1.90
 -25  -7   2   -2.60    1.70
 -25  -7   2   -1.60    1.60
 -25  -7   2   -0.60    1.50
  25  -7  -2    1.50    2.30
  25   7  -2    0.00    1.60
  25   7  -2   -0.80    2.10
 -25   7   2   -1.20    2.40
 -23  -7   2   -0.40    1.60
 -23  -7   2   -1.90    1.60
 -23  -7   2   -0.90    1.40
  23  -7  -2    2.90    2.30
 -23   7   2    3.20    3.30
  23   7  -2    1.70    2.00
 -23   7   2    0.60    1.80
  23   7  -2    2.70    1.50
 -23   7   2   -1.00    2.30
 -21  -7   2    0.20    1.60
  21  -7  -2    3.70    3.10
 -21  -7   2    2.50    1.30
 -21  -7   2    0.40    1.90
  21  -7  -2    2.50    2.10
  21  -7  -2    0.60    1.40
 -21   7   2    2.50    1.50
  21   7  -2    2.40    2.10
 -21   7   2    1.10    2.70
 -21   7   2    0.60    2.20
  21   7  -2    1.10    1.30
 -19  -7   2   10.20    2.60
  19  -7  -2    6.90    1.60
 -19  -7   2    5.60    1.40
  19  -7  -2   12.30    3.70
  19  -7  -2   11.80    2.50
 -19  -7   2    6.00    2.10
 -19   7   2    8.30    2.60
  19   7  -2    8.60    1.50
 -19   7   2   11.10    3.50
  19   7  -2    9.30    2.70
 -19   7   2    9.50    1.70
 -17  -7   2   -0.70    1.20
  17  -7  -2   -1.70    2.80
  17  -7  -2   -0.80    1.00
 -17  -7   2    0.80    1.60
 -17  -7   2    1.10    1.70
  17  -7  -2   -0.50    1.60
 -17   7   2   -1.00    1.00
 -17   7   2   -0.50    1.80
  17   7  -2   -0.30    1.00
  17   7  -2   -0.70    2.20
 -17   7   2   -3.90    2.50
 -15  -7   2   14.30    2.10
  15  -7  -2   13.40    1.70
  15  -7  -2   15.20    3.20
 -15  -7   2   14.30    1.70
 -15  -7   2   15.70    2.40
  15  -7  -2   13.40    2.00
  15  -7  -2   12.00    2.30
 -15   7   2   12.90    2.20
 -15   7   2   14.60    3.10
  15   7  -2   17.30    2.70
 -15   7   2   15.10    1.80
  15   7  -2   12.30    1.50
  13  -7  -2   21.10    4.10
  13  -7  -2   22.40    1.90
  13  -7  -2   22.50    2.40
 -13  -7   2   20.60    2.30
 -13  -7   2   21.40    2.00
 -13  -7   2   21.90    2.10
  13  -7  -2   20.10    2.60
 -13   7   2   21.20    1.80
 -13   7   2   24.30    3.40
  13   7  -2   23.20    2.70
 -13   7   2   21.20    3.00
  13   7  -2   23.50    1.70
  11  -7  -2   19.60    3.50
 -11  -7   2   18.80    1.70
  11  -7  -2   20.80    2.30
  11  -7  -2   19.20    2.70
 -11  -7   2   18.20    2.60
 -11  -7   2   20.50    1.90
  11   7  -2   21.20    4.00
 -11   7   2   19.30    2.60
 -11   7   2   18.50    3.00
  11   7  -2   20.60    2.70
 -11   7   2   18.50    1.60
   9  -7  -2  143.39    6.80
  -9  -7   2  148.79    4.40
   9  -7  -2  142.29    4.80
   9  -7  -2  142.39    5.20
  -9  -7   2  144.59    5.60
  -9  -7   2  147.49    4.90
  -9   7   2  142.79    5.90
  -9   7   2  135.89    4.30
   9   7  -2  150.98    6.70
   9   7  -2  148.09    5.70
  -9   7   2  136.29    6.70
  -7  -7   2  207.68    7.00
  -7  -7   2  210.38    5.80
  -7  -7   2  218.98    6.40
   7  -7  -2  217.38    8.60
   7  -7  -2  208.48    6.70
   7  -7  -2  214.28    5.60
  -7   7   2  204.98    7.20
  -7   7   2  227.68    8.90
   7   7  -2  222.18    7.10
  -7   7   2  215.18    5.90
   7   7  -2  216.18    8.20
   5  -7  -2   30.10    1.60
   5  -7  -2   29.70    3.60
   5  -7  -2   28.60    2.50
   5   7  -2   37.60    2.90
  -5   7   2   28.80    2.90
  -5   7   2   32.40    3.60
   5   7  -2   40.80    3.80
  -5   7   2   29.20    1.70
   3  -7  -2   59.59    3.10
   3  -7  -2   61.59    2.30
   3  -7  -2   61.49    3.90
  -3  -7   2   70.99    4.20
  -3  -7   2   61.39    2.70
  -3  -7   2   60.49    2.10
  -3  -7   2   58.99    3.10
   3   7  -2   61.99    3.30
  -3   7   2   61.89    3.70
  -3   7   2   60.79    2.30
   3   7  -2   66.89    4.40
  -3   7   2   61.79    4.00
   1  -7  -2  122.49    4.70
  -1  -7   2  125.49    4.80
  -1  -7   2  127.19    5.70
  -1  -7   2  126.79    3.50
   1  -7  -2  124.39    5.70
  -1  -7   2  129.69    4.10
   1  -7  -2  125.29    3.70
  -1   7   2  121.79    5.20
  -1   7   2  127.79    3.70
  -1   7   2  127.79    6.00
   1   7  -2  124.39    4.60
   1   7  -2  129.69    6.00
  -1  -7  -2   16.70    1.80
   1  -7   2   17.30    1.00
  -1  -7  -2   17.10    2.10
  -1  -7  -2   16.10    1.40
   1  -7   2   16.80    1.30
   1  -7   2   16.20    1.70
   1  -7   2   17.90    2.40
   1   7   2   15.00    2.30
  -1   7  -2   16.30    2.90
   1   7   2   16.20    2.20
  -1   7  -2   15.90    2.00
   1   7   2   14.30    1.20
   3  -7   2   17.60    1.10
  -3  -7  -2   18.10    2.30
   3  -7   2   20.20    1.50
   3  -7   2   18.60    2.50
  -3  -7  -2   20.20    1.50
  -3  -7  -2   19.50    2.20
   3  -7   2   21.20    2.20
  -3   7  -2   21.20    2.20
   3   7   2   18.10    1.30
   3   7   2   18.80    2.50
   3   7   2   20.70    2.70
  -3   7  -2   20.60    2.70
   5  -7   2  110.29    3.60
   5  -7   2  115.59    4.50
  -5  -7  -2  112.59    3.70
  -5  -7  -2  109.09    4.60
   5  -7   2  116.19    3.40
  -5  -7  -2  107.09    4.80
   5  -7   2  113.09    5.70
  -5   7  -2  112.79    5.90
   5   7   2  113.29    5.20
   5   7   2  111.99    5.10
  -5   7  -2  104.99    4.20
   5   7   2  107.79    3.40
   7  -7   2  100.59    3.40
  -7  -7  -2  106.29    3.50
   7  -7   2  100.69    3.30
   7  -7   2  101.39    4.30
   7  -7   2   97.19    5.20
  -7  -7  -2   98.69    4.50
  -7  -7  -2  102.49    3.60
  -7  -7  -2  101.89    4.80
  -7   7  -2   96.49    5.40
   7   7   2  105.49    3.30
   7   7   2  101.39    4.70
  -7   7  -2  100.79    4.10
   7   7   2  106.99    5.10
   9  -7   2    2.50    0.90
  -9  -7  -2    2.10    0.80
   9  -7   2    0.20    2.10
  -9  -7  -2   -1.40    1.60
  -9  -7  -2    0.50    0.90
   9  -7   2    1.20    0.80
   9  -7   2    0.60    1.00
   9   7   2    0.40    2.10
   9   7   2    1.20    0.90
   9   7   2    1.50    1.80
  -9   7  -2    1.10    1.20
  -9   7  -2    0.50    2.10
 -11  -7  -2   26.20    2.00
  11  -7   2   28.50    3.90
  11  -7   2   28.20    2.40
  11  -7   2   24.20    2.40
 -11  -7  -2   29.80    1.80
 -11  -7  -2   29.70    1.90
 -11  -7  -2   26.60    3.40
  11  -7   2   24.80    1.70
 -11   7  -2   25.70    2.40
  11   7   2   31.00    3.80
  11   7   2   29.70    1.90
 -11   7  -2   26.90    3.90
  11   7   2   29.30    1.90
  13  -7   2   53.29    3.50
  13  -7   2   53.69    2.70
 -13  -7  -2   59.99    4.40
 -13  -7  -2   53.99    2.70
  13  -7   2   56.09    4.90
  13  -7   2   55.99    3.60
 -13  -7  -2   52.59    2.70
 -13  -7  -2   56.89    3.20
  13   7   2   59.09    2.80
  13   7   2   57.29    4.00
 -13   7  -2   59.89    3.60
 -13   7  -2   59.69    5.20
  13   7   2   53.09    2.70
  15  -7   2   48.00    2.70
  15  -7   2   51.99    3.70
  15  -7   2   48.70    5.00
 -15  -7  -2   48.20    2.60
 -15  -7  -2   47.30    2.80
 -15  -7  -2   51.89    3.30
 -15  -7  -2   54.39    4.40
 -15   7  -2   46.40    5.10
  15   7   2   49.30    2.70
  15   7   2   50.49    4.70
 -15   7  -2   47.90    3.30
  15   7   2   48.70    2.80
  17  -7   2    2.50    1.40
 -17  -7  -2    3.90    1.90
 -17  -7  -2    4.60    1.30
 -17  -7  -2    1.80    1.30
  17  -7   2    1.70    2.00
  17  -7   2    4.60    2.90
 -17  -7  -2    0.60    1.30
 -17   7  -2    3.70    1.30
 -17   7  -2    4.20    2.90
  17   7   2    2.50    2.70
 -17   7  -2    4.90    2.10
  17   7   2    2.10    1.10
  17   7   2    3.00    1.20
  17   7   2    2.70    1.20
 -19  -7  -2    1.40    1.30
 -19  -7  -2    3.80    2.40
  19  -7   2    0.60    1.50
  19  -7   2    2.50    2.70
 -19  -7  -2    0.20    1.80
  19  -7   2   -2.40    1.90
  19   7   2    3.90    1.50
  19   7   2    1.10    2.00
 -19   7  -2    2.10    2.60
  19   7   2    0.90    1.50
 -19   7  -2    4.40    1.80
 -19   7  -2    2.00    1.40
  19   7   2    3.70    1.50
 -21  -7  -2   10.50    2.80
 -21  -7  -2    0.70    1.40
 -21  -7  -2    5.60    2.20
  21  -7   2   -1.10    2.30
  21   7   2    2.70    1.60
 -21   7  -2    4.90    2.50
 -21   7  -2    2.10    1.90
  21   7   2    2.50    1.60
  21   7   2    2.30    2.80
 -23  -7  -2    0.50    1.60
 -23  -7  -2   -1.60    2.10
 -23  -7  -2    8.10    2.70
  23   7   2   -0.10    2.10
  23   7   2    1.40    1.80
  23   7   2    1.00    1.30
 -25  -7  -2   -0.10    2.40
 -25  -7  -2    1.30    1.80
  25   7   2    2.30    1.90
  25   7   2   -0.10    1.90
  25   7   2   -2.00    2.90
 -24  -8   2    1.20    1.40
 -24  -8   2    0.00    2.30
  24  -8  -2    3.20    2.40
  24   8  -2   -0.10    2.20
 -24   8   2    1.20    2.60
 -22  -8   2   -0.20    2.20
 -22  -8   2    0.70    1.50
  22  -8  -2    1.30    3.40
  22  -8  -2    3.20    2.30
 -22   8   2   -0.40    2.40
  22   8  -2   -0.20    2.70
 -22   8   2    3.90    3.30
 -20  -8   2    0.30    1.50
  20  -8  -2    0.90    2.00
 -20  -8   2   -1.10    1.40
  20  -8  -2   -0.50    3.20
 -20   8   2    2.10    3.10
 -20   8   2   -2.40    2.00
  20   8  -2   -3.70    2.40
  18  -8  -2    1.20    2.00
  18  -8  -2    1.30    2.40
 -18  -8   2    1.00    1.90
 -18  -8   2    3.90    1.90
 -18  -8   2    0.20    1.30
 -18   8   2    1.00    2.30
  18   8  -2   -2.50    2.30
 -18   8   2    0.60    2.10
 -16  -8   2    4.70    1.40
  16  -8  -2    5.40    2.20
 -16  -8   2    4.00    1.90
  16  -8  -2    8.90    3.60
  16  -8  -2    6.50    1.80
 -16  -8   2    8.20    2.20
 -16   8   2    7.90    3.60
  16   8  -2    5.90    2.10
 -16   8   2    5.50    1.90
  14  -8  -2   52.59    3.30
  14  -8  -2   42.50    3.30
 -14  -8   2   47.80    2.70
 -14  -8   2   44.90    2.90
  14  -8  -2   43.90    4.60
 -14  -8   2   50.39    3.80
 -14   8   2   42.60    3.50
  14   8  -2   52.09    4.40
 -14   8   2   49.50    5.50
  12  -8  -2   14.50    2.10
  12  -8  -2   17.40    3.40
 -12  -8   2   12.30    1.70
 -12  -8   2   15.70    2.50
 -12  -8   2   13.50    2.00
  12   8  -2   13.50    2.70
 -12   8   2   14.50    3.10
 -12   8   2   13.00    2.50
 -10  -8   2   27.70    2.70
  10  -8  -2   31.10    2.80
 -10  -8   2   27.00    2.20
  10  -8  -2   32.70    4.50
  10   8  -2   28.40    4.40
 -10   8   2   34.80    4.50
  10   8  -2   29.40    3.60
 -10   8   2   30.20    3.40
   8  -8  -2  138.89    5.40
  -8  -8   2  142.49    4.90
   8  -8  -2  139.19    7.30
  -8  -8   2  127.79    5.40
   8   8  -2  139.89    5.90
  -8   8   2  127.79    6.80
  -8   8   2  139.69    6.00
   8   8  -2  141.39    7.00
   6  -8  -2    7.20    1.50
  -6  -8   2    8.00    2.00
  -6  -8   2    9.00    1.50
   6  -8  -2    6.20    2.80
  -6   8   2    9.20    2.20
   6   8  -2    8.30    2.90
  -6   8   2    7.80    2.90
   6   8  -2    7.80    2.20
   4  -8  -2   54.89    4.60
   4  -8  -2   48.30    2.10
  -4  -8   2   52.29    3.50
  -4  -8   2   59.59    2.80
   4  -8  -2   51.49    3.10
   4   8  -2   54.59    4.70
   4   8  -2   52.69    3.60
  -4   8   2   55.39    4.70
  -4   8   2   53.29    3.90
  -2  -8   2  120.39    4.20
   2  -8  -2  125.59    5.10
  -2  -8   2  127.69    5.10
  -2  -8   2  126.89    6.10
   2  -8  -2  118.99    3.70
   2  -8  -2  115.29    5.80
  -2   8   2  119.89    6.00
  -2   8   2  110.79    5.10
   2   8  -2  125.39    5.00
   2   8  -2  128.79    6.50
   0  -8  -2   41.60    3.40
   0  -8  -2   39.20    2.00
   0  -8   2   43.10    3.60
   0  -8  -2   40.10    2.80
   0  -8   2   41.40    2.30
   0  -8   2   41.00    3.00
   0   8  -2   39.30    2.90
   0   8  -2   40.90    3.70
   0   8   2   38.90    3.50
   0   8   2   36.00    3.50
  -2  -8  -2    4.40    1.70
   2  -8   2    6.60    1.20
  -2  -8  -2    6.50    1.10
   2  -8   2    6.90    2.10
   2  -8   2    6.00    1.40
  -2  -8  -2    7.40    2.20
  -2   8  -2    6.30    2.20
  -2   8  -2    6.20    1.60
   2   8   2    6.10    2.30
   2   8   2    5.60    1.80
  -4  -8  -2   54.89    3.90
   4  -8   2   49.90    4.00
  -4  -8  -2   47.50    3.20
  -4  -8  -2   52.29    2.40
   4  -8   2   50.89    2.40
   4  -8   2   52.19    3.20
   4   8   2   53.49    4.00
  -4   8  -2   51.19    3.30
   4   8   2   52.79    4.10
  -4   8  -2   50.99    4.20
  -6  -8  -2  114.19    4.00
   6  -8   2  118.79    4.90
   6  -8   2  105.29    5.80
   6  -8   2  113.19    3.80
  -6  -8  -2  115.49    5.30
  -6  -8  -2  110.59    5.20
   6   8   2  113.89    5.50
  -6   8  -2  105.19    4.50
   6   8   2  111.19    5.60
  -6   8  -2  114.39    6.10
   8  -8   2    2.70    1.10
   8  -8   2    1.40    1.70
  -8  -8  -2    3.80    1.80
  -8  -8  -2    4.60    1.10
  -8  -8  -2    2.00    1.90
   8  -8   2    3.50    2.10
   8   8   2    5.50    2.50
  -8   8  -2    4.70    1.50
   8   8   2    6.20    2.00
  -8   8  -2    5.30    2.20
  10  -8   2    0.00    1.70
  10  -8   2    0.30    1.90
 -10  -8  -2    1.20    2.00
  10  -8   2    1.40    1.10
 -10  -8  -2    0.30    1.30
 -10   8  -2    2.30    2.00
  10   8   2    1.30    2.40
 -12  -8  -2   40.80    2.90
  12  -8   2   33.50    2.30
  12  -8   2   31.90    3.20
 -12  -8  -2   37.60    3.90
  12  -8   2   39.60    4.80
  12   8   2   38.00    2.30
 -12   8  -2   36.60    4.90
  12   8   2   39.50    4.40
  14  -8   2   27.10    3.30
  14  -8   2   29.60    2.30
 -14  -8  -2   29.60    2.90
 -14  -8  -2   31.90    3.90
  14  -8   2   30.50    4.80
  14   8   2   26.00    2.20
  14   8   2   24.10    3.40
 -14   8  -2   32.20    5.00
 -16  -8  -2    2.00    1.70
  16  -8   2    0.90    1.90
 -16  -8  -2    3.30    2.40
  16  -8   2    0.20    1.30
  16  -8   2    2.30    3.10
  16   8   2   -0.60    2.00
  16   8   2    1.00    1.30
 -16   8  -2    3.30    1.60
 -16   8  -2    1.60    3.00
  18  -8   2   28.20    4.80
 -18  -8  -2   26.10    3.30
  18  -8   2   17.60    3.00
 -18  -8  -2   18.80    2.60
 -18   8  -2   28.80    3.60
  18   8   2   20.40    3.70
 -18   8  -2   20.60    3.80
  18   8   2   27.30    2.50
 -20  -8  -2    3.30    2.10
  20  -8   2    4.10    3.40
  20  -8   2   -1.10    2.30
 -20  -8  -2   11.90    2.90
 -20   8  -2    6.00    2.60
  20   8   2    2.20    3.00
 -20   8  -2    6.40    3.40
  20   8   2    6.90    1.80
 -22  -8  -2    7.40    2.70
 -22  -8  -2   -1.20    1.50
  22   8   2    1.00    1.60
  22   8   2    2.80    2.40
 -24  -8  -2    0.00    1.70
 -24  -8  -2    6.70    3.30
  24   8   2   -0.70    2.00
  24   8   2   -1.20    3.10
 -23  -9   2    2.90    2.50
  23  -9  -2    0.30    3.80
  23   9  -2    0.70    2.20
 -23   9   2    3.10    3.70
  21  -9  -2    4.00    3.50
 -21  -9   2   -1.10    1.60
  21  -9  -2    1.30    3.60
 -21   9   2    2.50    2.80
 -21   9   2    0.30    2.70
  21   9  -2    1.50    2.20
  19  -9  -2    5.90    3.80
 -19  -9   2    1.70    2.20
 -19  -9   2    5.90    2.40
  19  -9  -2    1.20    2.10
 -19   9   2    4.80    3.80
 -19   9   2    0.70    2.40
  19   9  -2    0.90    2.70
 -17  -9   2   13.50    2.70
 -17  -9   2    7.70    2.20
  17  -9  -2   13.30    4.20
  17  -9  -2    5.90    2.30
 -17   9   2    8.40    2.60
  17   9  -2   10.50    3.00
 -17   9   2    9.70    4.00
  15  -9  -2    6.40    3.60
 -15  -9   2    4.80    2.20
 -15  -9   2    2.20    1.80
  15  -9  -2    3.40    1.90
 -15   9   2    5.80    3.50
  15   9  -2    3.50    2.00
 -15   9   2    2.30    2.20
  13  -9  -2   15.40    2.40
 -13  -9   2   15.00    2.30
 -13  -9   2   22.60    3.40
  13  -9  -2   22.10    4.40
  13   9  -2   18.70    3.20
 -13   9   2   20.10    4.30
 -13   9   2   14.70    2.50
 -11  -9   2    0.40    1.90
  11  -9  -2    2.60    3.10
 -11  -9   2    1.50    1.50
  11  -9  -2    3.20    1.80
  11   9  -2   -0.50    2.30
 -11   9   2    1.80    3.00
 -11   9   2    1.40    2.00
  -9  -9   2   21.70    2.70
   9  -9  -2   25.10    2.90
   9  -9  -2   28.60    4.70
  -9  -9   2   27.90    2.70
   9   9  -2   21.30    3.10
  -9   9   2   26.00    3.90
  -9   9   2   29.30    3.70
   9   9  -2   26.00    4.60
  -7  -9   2   21.80    3.20
   7  -9  -2   23.90    3.00
   7  -9  -2   22.90    4.50
  -7  -9   2   26.70    2.50
   7   9  -2   18.00    3.70
  -7   9   2   18.80    2.90
  -7   9   2   24.80    4.60
   7   9  -2   17.70    2.80
  -5  -9   2   10.10    1.90
  -5  -9   2   10.70    1.70
   5  -9  -2    9.20    3.40
   5  -9  -2   10.80    1.90
  -5   9   2    6.60    3.50
   5   9  -2    7.80    2.50
   5   9  -2    6.70    2.70
  -5   9   2   10.80    2.60
  -3  -9   2   12.00    2.80
   3  -9  -2   15.40    2.60
  -3  -9   2   10.30    1.50
   3  -9  -2   14.90    3.50
  -3  -9   2   11.50    2.50
  -3   9   2   15.20    2.80
   3   9  -2    9.80    3.50
   3   9  -2   11.60    2.50
  -3   9   2   13.00    3.70
   1  -9  -2   61.49    3.70
   1  -9  -2   60.09    2.70
   1  -9  -2   62.69    4.60
  -1  -9   2   61.39    3.70
  -1  -9   2   67.09    3.20
  -1  -9   2   64.79    5.40
   1   9  -2   60.69    5.60
  -1   9   2   63.79    4.70
  -1   9   2   65.49    5.50
   1   9  -2   62.09    4.00
   1  -9   2  135.29    5.60
  -1  -9  -2  138.29    4.50
  -1  -9  -2  146.39    7.00
   1  -9   2  139.59    4.80
  -1  -9  -2  148.99    6.10
   1  -9   2  144.19    7.40
  -1   9  -2  141.19    5.70
   1   9   2  139.19    7.20
   1   9   2  137.99    6.50
  -1   9  -2  138.39    7.70
   3  -9   2    7.00    2.10
  -3  -9  -2    6.90    2.20
  -3  -9  -2    7.50    2.70
   3  -9   2    4.20    2.40
  -3  -9  -2    7.60    1.30
   3  -9   2    4.90    1.40
  -3   9  -2    4.80    2.50
  -3   9  -2    6.30    2.10
   3   9   2    4.80    2.60
   3   9   2    3.30    2.60
  -5  -9  -2   52.79    2.70
   5  -9   2   50.99    2.70
   5  -9   2   48.20    3.30
   5  -9   2   55.49    5.20
  -5  -9  -2   47.40    3.50
  -5  -9  -2   55.79    4.40
  -5   9  -2   53.69    5.40
   5   9   2   53.29    4.50
  -5   9  -2   52.69    4.10
   5   9   2   56.59    4.50
  -7  -9  -2    4.10    2.20
   7  -9   2    8.00    3.20
   7  -9   2    6.10    1.70
   7  -9   2    6.50    1.40
  -7  -9  -2    4.60    1.40
  -7  -9  -2    5.40    1.90
   7   9   2    6.10    2.40
   7   9   2    7.90    2.20
  -7   9  -2    6.00    3.10
   9  -9   2    7.10    1.30
  -9  -9  -2    6.50    2.40
  -9  -9  -2    7.10    1.60
   9  -9   2    7.40    3.30
   9  -9   2    6.00    2.10
  -9   9  -2    5.90    3.20
   9   9   2    6.40    2.80
  11  -9   2    5.50    2.20
 -11  -9  -2    7.20    2.10
 -11  -9  -2    6.90    1.50
  11  -9   2    8.50    1.50
  11  -9   2   10.00    3.10
 -11   9  -2    5.10    2.70
  11   9   2    3.50    2.90
 -13  -9  -2   16.00    3.20
  13  -9   2    9.80    2.10
 -13  -9  -2   10.50    2.00
  13  -9   2   13.50    4.00
  13  -9   2   13.70    1.70
  13   9   2   11.00    2.70
 -13   9  -2   13.50    3.50
  15  -9   2   21.70    4.60
 -15  -9  -2   25.20    2.40
 -15  -9  -2   36.70    4.20
  15  -9   2   23.50    3.30
 -15   9  -2   28.70    5.30
  15   9   2   20.40    3.30
  17  -9   2    1.20    2.20
 -17  -9  -2    2.20    1.50
  17  -9   2    1.40    2.60
 -17  -9  -2    9.70    2.80
 -17   9  -2    9.50    2.40
  17   9   2   -0.20    3.00
 -17   9  -2    2.30    2.70
  19  -9   2    4.90    3.80
  19  -9   2    4.40    2.60
 -19  -9  -2    6.10    2.20
 -19  -9  -2   11.40    3.10
  19   9   2    2.30    3.20
 -19   9  -2    7.60    2.60
 -19   9  -2   10.60    4.10
 -21  -9  -2    7.90    3.00
 -21  -9  -2   -2.30    2.00
  21  -9   2   -1.70    3.40
 -21   9  -2   -0.20    2.50
  21   9   2   -0.70    2.30
 -23  -9  -2    9.60    2.90
 -23  -9  -2    1.90    2.50
  23   9   2   -2.10    3.20
  22 -10  -2    7.10    3.40
 -22 -10   2    2.70    1.90
  22  10  -2    4.60    3.30
 -22  10   2    2.50    4.20
 -20 -10   2    5.50    2.50
  20 -10  -2    2.20    4.20
 -20  10   2    3.20    4.20
  20  10  -2    1.80    3.10
 -18 -10   2   -0.10    2.10
 -18 -10   2    6.80    2.60
  18 -10  -2    1.70    3.80
 -18  10   2   -0.50    2.70
  18  10  -2   -1.10    2.00
 -16 -10   2    9.70    2.40
 -16 -10   2   13.60    2.90
  16 -10  -2   15.40    4.70
  16  10  -2   10.90    3.20
 -16  10   2   13.40    4.40
 -16  10   2   12.00    3.00
  14 -10  -2   50.49    3.90
  14 -10  -2   49.70    6.20
 -14 -10   2   50.99    4.40
 -14 -10   2   42.10    3.10
 -14  10   2   57.19    6.50
 -14  10   2   47.00    4.60
  14  10  -2   42.80    4.60
 -12 -10   2   14.30    2.30
  12 -10  -2   13.80    2.20
 -12 -10   2   17.40    3.10
  12 -10  -2   18.30    4.50
 -12  10   2   19.60    4.50
  12  10  -2   14.60    3.10
 -12  10   2   13.70    2.90
 -10 -10   2   33.80    3.30
  10 -10  -2   47.00    5.70
 -10 -10   2   41.70    3.10
  10 -10  -2   42.30    3.50
 -10  10   2   45.30    5.70
 -10  10   2   36.30    4.20
  10  10  -2   31.60    4.20
  -8 -10   2   58.89    4.40
  -8 -10   2   47.80    3.20
   8 -10  -2   52.29    3.80
   8 -10  -2   48.30    4.80
  -8  10   2   48.60    4.40
   8  10  -2   47.60    5.50
  -8  10   2   54.09    5.80
   8  10  -2   47.80    4.30
  -6 -10   2   24.00    3.40
   6 -10  -2   18.50    2.80
   6 -10  -2   22.90    3.70
  -6 -10   2   19.50    2.00
   6  10  -2   20.00    4.10
  -6  10   2   18.50    3.20
  -6  10   2   20.80    3.80
   6  10  -2   19.70    3.00
   4 -10  -2  141.69    7.40
   4 -10  -2  143.59    6.20
  -4 -10   2  146.79    5.10
  -4 -10   2  150.08    6.40
   4  10  -2  134.09    7.30
  -4  10   2  139.79    7.60
  -4  10   2  145.99    6.80
   4  10  -2  151.08    6.60
   2 -10  -2   53.29    4.00
   2 -10  -2   54.89    5.30
  -2 -10   2   55.59    4.10
  -2 -10   2   51.89    5.30
  -2 -10   2   50.39    3.00
  -2  10   2   46.40    4.50
   2  10  -2   43.60    3.90
   2  10  -2   54.99    5.70
  -2  10   2   53.09    5.50
   0 -10   2    1.20    1.30
   0 -10  -2    0.40    2.00
   0 -10   2    0.50    3.00
   0 -10  -2    1.60    2.00
   0 -10   2    1.90    1.90
   0  10   2    0.20    1.80
   0  10  -2    1.60    2.00
   0  10   2   -1.80    2.60
   0  10  -2   -0.70    3.00
   2 -10   2   29.50    4.70
  -2 -10  -2   30.90    2.20
  -2 -10  -2   33.10    4.30
  -2 -10  -2   28.10    2.90
   2 -10   2   29.80    2.30
   2 -10   2   27.00    2.80
   2  10   2   29.00    4.10
  -2  10  -2   26.20    4.10
   2  10   2   29.00    4.40
   4 -10   2   12.60    3.70
  -4 -10  -2   13.50    2.70
   4 -10   2   12.10    1.60
   4 -10   2   11.40    2.40
  -4 -10  -2   11.00    3.10
  -4 -10  -2   13.80    1.70
   4  10   2   12.80    3.00
  -4  10  -2   11.10    3.80
   4  10   2   11.90    3.20
   6 -10   2   -1.40    1.10
   6 -10   2   -2.00    2.10
  -6 -10  -2   -0.20    1.20
  -6 -10  -2   -0.30    2.10
   6 -10   2   -1.50    1.80
  -6 -10  -2   -1.60    2.30
   6  10   2   -1.40    2.40
  -6  10  -2   -1.90    3.00
   6  10   2   -1.80    2.50
   8 -10   2    0.90    1.90
   8 -10   2   -1.70    3.10
  -8 -10  -2    2.10    2.20
  -8 -10  -2    0.70    1.30
   8 -10   2    0.50    1.10
   8  10   2    0.20    2.00
  -8  10  -2   -2.70    3.10
 -10 -10  -2    4.00    1.50
 -10 -10  -2    6.30    2.50
  10 -10   2    3.80    3.60
  10 -10   2    4.40    1.40
  10 -10   2    4.60    2.20
  10  10   2    1.60    2.80
 -10  10  -2    1.20    3.40
  12 -10   2   -0.60    2.10
 -12 -10  -2    0.40    1.50
 -12 -10  -2    1.60    1.80
  12 -10   2   -0.50    3.40
 -12  10  -2   -0.80    3.40
  12  10   2   -2.80    2.80
  14 -10   2    3.40    3.00
 -14 -10  -2    4.80    2.20
 -14 -10  -2    2.30    1.80
  14 -10   2    2.50    2.20
  14  10   2   -0.80    2.90
 -14  10  -2    2.50    2.90
  16 -10   2    1.00    2.80
 -16 -10  -2    6.00    2.70
  16 -10   2    0.10    2.30
 -16 -10  -2    2.70    1.90
 -16  10  -2    2.40    3.80
  16  10   2   -0.50    2.30
  18 -10   2    5.10    2.60
 -18 -10  -2   13.00    3.40
 -18 -10  -2    6.10    2.30
  18 -10   2    3.60    4.20
  18  10   2    1.40    3.40
 -18  10  -2    6.60    4.30
 -18  10  -2   14.90    3.00
  20 -10   2    4.00    2.80
 -20 -10  -2    6.90    2.50
  20 -10   2    5.20    4.40
 -20 -10  -2   16.30    3.50
 -20  10  -2    6.10    4.30
  20  10   2    8.10    3.80
 -20  10  -2   10.80    2.80
 -19 -11   2    3.10    2.40
 -19 -11   2    7.60    3.90
  19 -11  -2    0.00    3.10
 -19  11   2    2.60    3.30
  19  11  -2    2.50    3.30
 -17 -11   2    0.60    2.10
  17 -11  -2    1.00    4.40
 -17 -11   2    5.40    2.60
 -17  11   2    2.40    4.30
  17  11  -2   -2.20    2.90
  15 -11  -2    4.30    4.40
 -15 -11   2    1.40    2.00
 -15 -11   2    2.10    1.90
  15  11  -2   -2.10    2.80
 -15  11   2    4.30    4.20
  13 -11  -2    3.70    4.10
 -13 -11   2    1.50    1.90
 -13 -11   2    0.30    1.80
  13 -11  -2    0.80    2.00
 -13  11   2    2.70    3.80
  13  11  -2   -0.10    2.70
 -13  11   2   -0.90    2.30
 -11 -11   2    0.80    2.20
  11 -11  -2    2.00    2.00
 -11 -11   2   -0.60    1.20
  11 -11  -2    2.70    3.80
  11  11  -2   -3.30    2.30
 -11  11   2    0.20    3.40
 -11  11   2   -2.60    2.20
  -9 -11   2    2.30    1.70
   9 -11  -2   -1.40    2.40
   9 -11  -2    1.60    1.60
  -9 -11   2    2.20    2.40
  -9  11   2    0.90    2.50
   9  11  -2   -4.40    2.30
  -9  11   2    0.10    2.40
   9  11  -2   -2.10    4.40
   7 -11  -2    7.10    2.30
  -7 -11   2    4.50    1.80
  -7 -11   2    8.80    2.30
   7 -11  -2    7.40    3.80
  -7  11   2    8.90    3.90
  -7  11   2    8.40    2.90
   7  11  -2    3.50    3.60
   7  11  -2    3.80    2.50
  -5 -11   2   12.30    2.00
   5 -11  -2   13.10    4.10
   5 -11  -2   10.30    2.20
  -5 -11   2   12.80    2.50
  -5  11   2   14.80    4.10
  -5  11   2    5.40    2.80
   5  11  -2   11.20    3.90
   5  11  -2   10.20    2.80
   3 -11  -2    0.50    1.50
  -3 -11   2    0.30    1.60
  -3 -11   2   -1.10    1.30
   3 -11  -2    1.00    3.10
  -3  11   2   -0.50    3.00
   3  11  -2   -3.80    3.10
  -3  11   2   -0.90    2.50
  -1 -11   2   35.10    3.20
  -1 -11   2   37.10    5.30
  -1 -11   2   43.30    2.80
   1 -11  -2   40.50    3.90
   1 -11  -2   32.60    4.20
  -1  11   2   31.30    3.90
   1  11  -2   35.90    5.70
  -1  11   2   38.70    5.30
  -1 -11  -2   39.80    3.50
   1 -11   2   48.00    4.00
   1 -11   2   41.20    5.60
  -1 -11  -2   46.30    5.30
   1 -11   2   39.50    2.40
  -1  11  -2   32.10    5.60
   1  11   2   37.70    4.40
   1  11   2   40.10    4.70
  -3 -11  -2   -0.30    1.90
   3 -11   2   -1.20    2.30
   3 -11   2    0.60    1.50
  -3 -11  -2   -0.40    2.10
   3 -11   2    0.70    1.20
   3  11   2   -6.00    2.40
   3  11   2    0.00    2.00
  -3  11  -2   -0.70    2.40
  -5 -11  -2    9.90    2.70
  -5 -11  -2    6.60    1.60
   5 -11   2    9.60    2.50
   5 -11   2    7.70    3.10
  -5 -11  -2    6.20    3.00
   5 -11   2    8.80    1.60
   5  11   2    5.40    2.40
   5  11   2    7.30    3.10
  -5  11  -2    6.00    3.00
  -7 -11  -2    0.40    1.60
   7 -11   2   -0.80    2.50
   7 -11   2   -0.20    1.30
  -7 -11  -2   -0.50    1.20
   7 -11   2    0.60    1.50
   7  11   2   -0.60    2.10
  -7  11  -2   -0.80    2.40
   9 -11   2    0.00    1.50
  -9 -11  -2   -0.60    1.30
  -9 -11  -2    1.20    2.30
   9 -11   2   -3.60    3.40
  -9  11  -2   -4.50    3.20
   9  11   2   -3.90    2.60
  11 -11   2   -4.70    3.60
  11 -11   2    0.10    2.10
 -11 -11  -2    1.70    1.80
 -11 -11  -2    3.10    1.60
 -11  11  -2   -3.90    3.40
  11  11   2   -3.20    2.10
  13 -11   2   -3.30    3.90
 -13 -11  -2    3.90    2.10
 -13 -11  -2    0.20    1.70
  13 -11   2   -1.40    2.20
 -13  11  -2   -3.50    3.80
  13  11   2   -3.20    2.20
  15 -11   2    2.80    4.40
 -15 -11  -2    6.70    2.90
  15 -11   2    3.50    2.60
 -15 -11  -2    3.40    2.00
 -15  11  -2   -1.60    4.20
  15  11   2    0.20    3.40
  17 -11   2    0.20    4.40
  17 -11   2    1.70    2.70
 -17 -11  -2    2.70    2.20
 -17 -11  -2    6.10    3.00
  17  11   2   -1.10    3.40
 -17  11  -2    0.10    4.40
 -19 -11  -2    7.20    2.60
 -19 -11  -2    4.70    2.30
  19 -11   2   -1.30    4.40
  19 -11   2    3.90    2.90
  19  11   2   -1.00    3.70
 -19  11  -2   -0.20    4.40
 -19  11  -2   11.80    3.00
 -16 -12   2    2.10    2.80
 -16 -12   2    0.40    2.20
  16 -12  -2    0.70    4.80
  16  12  -2   -4.10    3.00
 -16  12   2   -0.20    4.40
  14 -12  -2    6.20    2.60
 -14 -12   2    7.70    2.40
  14 -12  -2    9.40    5.00
 -14 -12   2    9.90    3.10
  14  12  -2    4.50    2.60
 -14  12   2    6.20    4.70
 -12 -12   2   13.90    2.50
  12 -12  -2   10.70    5.10
  12 -12  -2   14.20    2.80
 -12 -12   2    9.40    3.10
  12  12  -2    4.00    3.20
 -12  12   2   11.90    4.90
 -10 -12   2   -0.30    2.40
  10 -12  -2   -0.40    4.10
 -10 -12   2    0.40    1.70
  10 -12  -2   -0.20    2.10
 -10  12   2   -1.30    2.70
  10  12  -2   -2.50    2.70
   8 -12  -2   -1.30    3.70
  -8 -12   2    0.20    1.80
   8 -12  -2    2.40    2.10
  -8 -12   2    0.50    1.70
  -8  12   2    0.80    3.60
  -8  12   2    0.60    2.60
   8  12  -2   -4.00    3.70
  -6 -12   2   -1.00    2.30
  -6 -12   2    0.50    1.50
   6 -12  -2   -1.40    2.00
   6 -12  -2   -1.10    2.50
  -6  12   2   -5.10    2.30
  -6  12   2   -1.70    2.30
   6  12  -2   -5.80    3.30
   4 -12  -2   -1.80    2.40
  -4 -12   2   -1.50    0.90
   4 -12  -2   -2.20    2.00
  -4 -12   2   -1.50    2.10
   4  12  -2   -4.90    3.30
  -4  12   2    0.70    2.50
  -4  12   2   -3.80    2.50
   2 -12  -2   -1.00    1.50
   2 -12  -2    0.40    3.20
  -2 -12   2    0.80    1.40
  -2 -12   2   -0.90    1.50
   2  12  -2   -3.90    3.30
  -2  12   2   -3.40    2.60
  -2  12   2    1.00    3.20
   0 -12  -2   11.60    2.80
   0 -12  -2   13.50    4.00
   0 -12   2   13.20    2.00
   0 -12   2   10.80    4.30
   0 -12   2   15.90    2.90
   0  12  -2   13.20    4.50
   0  12   2   14.10    4.00
   0  12   2    9.40    3.30
  -2 -12  -2    2.30    2.40
   2 -12   2    4.60    2.30
   2 -12   2    1.90    1.40
   2 -12   2    0.40    2.80
  -2 -12  -2    2.50    3.20
  -2  12  -2    2.00    2.80
   2  12   2   -2.50    2.80
   2  12   2    2.60    3.30
  -4 -12  -2    5.30    2.60
   4 -12   2   -0.70    3.80
   4 -12   2    5.60    2.40
  -4 -12  -2    1.50    3.10
  -4  12  -2    0.60    3.60
   4  12   2   -4.70    2.80
   4  12   2   -0.50    3.00
   6 -12   2    3.50    2.30
  -6 -12  -2    3.20    2.00
   6 -12   2   -0.40    4.00
  -6  12  -2   -1.70    3.60
   6  12   2   -3.40    3.00
  -8 -12  -2    1.30    2.40
   8 -12   2   -3.10    2.80
   8 -12   2    0.80    2.20
  -8 -12  -2    2.30    2.10
  -8  12  -2   -0.50    2.90
   8  12   2   -4.50    3.10
 -10 -12  -2    2.00    2.10
  10 -12   2    2.60    2.50
  10 -12   2   -3.70    4.30
 -10 -12  -2    1.10    1.20
 -10  12  -2   -0.70    4.10
  10  12   2   -5.90    3.00
 -12 -12  -2    1.40    1.30
  12 -12   2    1.00    2.50
 -12 -12  -2    3.00    2.20
  12 -12   2   -0.90    3.30
 -12  12  -2   -1.90    3.10
  12  12   2   -2.10    2.50
  14 -12   2    0.40    1.90
 -14 -12  -2    3.90    2.20
 -14 -12  -2    1.90    1.90
  14 -12   2   -1.70    4.60
  14  12   2   -7.50    3.30
 -14  12  -2   -0.90    4.40
 -16 -12  -2    5.70    2.90
 -16 -12  -2    0.30    1.90
  16 -12   2   -3.00    4.60
  16 -12   2    1.50    2.80
 -16  12  -2   -2.10    4.50
  16  12   2   -6.20    3.30
  13 -13  -2    0.50    4.80
 -13 -13   2    6.00    3.00
 -13 -13   2    2.60    2.10
  13 -13  -2    0.40    2.40
 -13  13   2    3.20    4.60
 -11 -13   2    0.80    2.80
  11 -13  -2    2.00    4.80
 -11 -13   2    2.60    2.10
  11 -13  -2    5.20    2.60
 -11  13   2    2.30    4.50
   9 -13  -2    7.90    2.70
  -9 -13   2    5.70    2.10
   9 -13  -2    4.20    3.80
  -9 -13   2    7.40    2.50
  -9  13   2    5.50    3.70
  -7 -13   2    6.90    3.00
   7 -13  -2    1.60    4.40
   7 -13  -2    4.50    2.60
  -7 -13   2    6.30    1.90
   7  13  -2    0.80    4.60
  -7  13   2    2.60    4.20
   5 -13  -2    0.20    1.80
  -5 -13   2    3.00    1.70
   5 -13  -2   -1.60    3.90
  -5 -13   2   -0.10    1.90
   5  13  -2   -6.80    3.80
  -5  13   2   -3.30    3.50
  -3 -13   2    2.40    2.60
   3 -13  -2   -0.80    2.30
  -3 -13   2    2.20    1.60
   3 -13  -2   -2.00    3.70
   3  13  -2   -5.80    3.80
  -3  13   2   -4.90    2.80
  -3  13   2   -4.20    3.40
   1 -13  -2    1.10    3.80
   1 -13  -2    9.10    2.90
  -1 -13   2    6.90    1.90
  -1 -13   2    5.10    2.60
  -1  13   2    0.70    3.10
  -1  13   2    2.00    3.70
   1  13  -2    0.10    4.20
  -1 -13  -2   -4.90    3.20
  -1 -13  -2   -0.30    2.30
   1 -13   2   -2.80    3.00
   1 -13   2    1.90    2.40
   1  13   2   -1.70    3.40
  -1  13  -2   -3.10    2.70
   3 -13   2    4.30    4.60
  -3 -13  -2    7.20    2.90
  -3 -13  -2    4.70    3.70
   3 -13   2    5.80    2.70
   3  13   2    1.50    3.40
  -3  13  -2    4.60    4.50
   3  13   2    3.10    3.80
   5 -13   2    5.40    2.70
  -5 -13  -2    7.80    2.90
   5 -13   2    0.60    4.70
  -5  13  -2    4.80    4.70
   5  13   2   -1.90    3.30
  -7 -13  -2    4.40    2.80
   7 -13   2   -2.60    4.60
   7 -13   2    2.20    2.00
  -7  13  -2   -1.30    4.30
   7  13   2   -5.40    3.00
   9 -13   2   10.20    3.10
  -9 -13  -2    8.70    2.70
   9 -13   2    7.20    4.20
  -9  13  -2    6.90    4.00
   9  13   2    0.70    3.60
  11 -13   2    3.70    2.20
  11 -13   2   -2.50    5.10
 -11 -13  -2    5.10    3.20
  11  13   2   -3.40    3.40
 -11  13  -2   -0.40    4.80
  13 -13   2    0.90    2.80
 -13 -13  -2    3.80    3.10
 -13 -13  -2    2.20    2.20
  13 -13   2   -4.30    3.50
 -13  13  -2   -3.70    4.60
  13  13   2   -6.90    3.50
   8 -14  -2    0.70    3.70
  -8 -14   2    4.40    2.00
   6 -14  -2   -4.60    4.40
   6 -14  -2   -0.80    2.40
  -6 -14   2    3.80    1.80
  -6 -14   2    6.40    3.20
  -6  14   2    0.30    3.30
   6  14  -2   -9.70    5.90
  -4 -14   2    2.10    2.10
   4 -14  -2    0.40    4.30
   4 -14  -2    1.90    2.60
  -4  14   2    3.20    4.40
   2 -14  -2    3.20    2.10
   2 -14  -2    1.90    4.20
  -2 -14   2    5.00    2.80
  -2  14   2    0.40    3.10
   2  14  -2   -2.70    4.70
   0 -14  -2   15.10    3.00
   0 -14  -2   15.00    5.00
   0  14   2   16.20    5.30
   0  14  -2   14.10    4.70
   2 -14   2    8.30    3.10
  -2 -14  -2    3.20    2.20
  -2 -14  -2    4.40    4.00
   2  14   2   -3.60    5.00
   2  14   2    0.40    3.10
  -2  14  -2    3.50    5.10
   4 -14   2    7.60    3.00
  -4 -14  -2    8.00    3.20
   4 -14   2    6.60    5.50
  -4  14  -2    3.10    5.10
   4  14   2   -6.00    3.50
   6 -14   2    7.60    3.10
  -6 -14  -2    7.60    2.70
   6 -14   2    0.40    5.30
   6  14   2   -3.60    3.70
  -6  14  -2    4.80    5.40
  30   0  -3    2.00    2.00
  30   0  -3   -0.80    1.50
 -30   0   3   -5.70    1.80
 -30   0   3   -0.40    1.90
  28   0  -3   -1.80    1.30
 -28   0   3   -1.20    1.80
  28   0  -3    2.60    2.50
 -28   0   3    1.20    1.40
 -28   0   3   -1.80    1.70
  26   0  -3    3.20    2.30
  26   0  -3   -2.40    1.70
  26   0  -3    0.20    1.30
 -26   0   3   -0.10    1.20
 -26   0   3   -1.50    1.60
 -26   0   3   -0.60    1.70
 -24   0   3    0.50    1.40
 -24   0   3   -1.60    1.50
 -24   0   3   -1.90    1.30
  24   0  -3    0.20    1.00
 -24   0   3   -0.10    1.00
  24   0  -3   -2.10    1.50
  24   0  -3    0.40    1.50
  24   0  -3   -0.90    1.90
 -22   0   3    1.70    1.10
 -22   0   3    1.10    1.00
 -22   0   3    0.10    1.40
  22   0  -3   -0.70    1.30
  22   0  -3   -1.00    1.40
  22   0  -3    0.20    1.10
 -22   0   3    0.10    1.30
  22   0  -3    1.30    1.00
  20   0  -3    0.40    1.00
 -20   0   3    0.60    1.00
 -20   0   3    0.10    1.30
  20   0  -3    0.90    1.40
 -20   0   3    2.10    1.10
  20   0  -3    1.90    1.30
 -20   0   3    2.20    1.30
  20   0  -3    0.20    1.00
  18   0  -3    1.10    1.30
 -18   0   3    1.90    0.90
 -18   0   3    1.60    1.20
  18   0  -3    1.60    0.90
 -18   0   3    1.70    1.20
 -18   0   3    1.80    0.90
  18   0  -3    3.30    1.90
  18   0  -3    0.70    1.20
  18   0  -3    2.60    1.50
  16   0  -3    0.50    1.00
  16   0  -3   -0.80    0.90
 -16   0   3   -0.20    0.70
  16   0  -3   -0.20    1.30
 -16   0   3    0.40    0.90
  16   0  -3    0.40    0.90
 -16   0   3   -1.20    0.90
  16   0  -3    0.60    0.90
  14   0  -3    0.60    1.10
 -14   0   3    0.10    0.60
  14   0  -3    1.40    0.70
  14   0  -3    0.40    0.60
  14   0  -3    0.10    1.30
 -14   0   3    1.10    0.90
  14   0  -3    1.70    0.90
 -14   0   3    0.60    0.90
 -14   0   3    0.80    0.80
 -12   0   3   -0.20    0.70
  12   0  -3    0.10    0.70
 -12   0   3   -0.80    0.70
 -12   0   3   -0.40    0.50
  12   0  -3   -0.40    0.90
  12   0  -3   -1.60    1.10
 -12   0   3   -0.10    0.60
  12   0  -3   -0.50    0.50
  12   0  -3   -0.40    0.50
 -10   0   3   -0.20    0.40
 -10   0   3   -0.70    0.50
  10   0  -3    0.20    0.60
  10   0  -3   -0.90    0.60
  10   0  -3   -0.60    0.50
  10   0  -3   -1.00    1.10
 -10   0   3    0.00    0.50
 -10   0   3   -0.80    0.50
  10   0  -3   -1.00    0.70
   8   0  -3   -0.50    0.60
   8   0  -3    1.20    0.90
  -8   0   3    0.40    0.40
   8   0  -3    0.00    0.40
   8   0  -3   -0.40    0.30
  -8   0   3   -0.50    0.30
  -8   0   3    0.00    0.40
   6   0  -3   -0.30    0.40
   6   0  -3   -0.80    0.90
   6   0  -3   -1.00    0.30
  -6   0   3   -0.70    0.40
  -6   0   3   -1.10    0.40
  -6   0   3    0.40    0.40
   4   0  -3   -0.50    1.10
   4   0  -3   -0.40    0.20
  -4   0   3   -0.10    0.30
  -4   0   3    0.10    0.20
  -4   0   3   -0.30    0.10
   2   0  -3    0.30    0.30
   2   0  -3    0.20    0.10
  -2   0   3   -0.30    0.30
   2   0  -3   -0.40    0.50
  -2   0   3   -0.10    0.20
  -2   0   3    0.20    0.30
  -2   0   3    0.20    0.10
   0   0   3   -0.50    0.30
   0   0   3   -0.90    0.10
   0   0  -3   -0.90    0.30
   0   0   3   -0.80    0.10
   0   0   3   -0.70    0.10
   0   0   3   -0.50    0.20
   0   0  -3   -0.60    0.30
  -2   0  -3   -1.00    0.40
   2   0   3   -1.00    0.40
  -2   0  -3   -1.70    0.30
   2   0   3   -2.20    0.10
   2   0   3   -2.20    0.20
   2   0   3   -1.90    0.20
   2   0   3   -1.30    0.30
  -4   0  -3    0.90    0.70
   4   0   3    1.00    0.60
   4   0   3    0.30    0.40
   4   0   3    0.00    0.30
  -4   0  -3    3.40    0.60
   4   0   3    0.30    0.30
   4   0   3    1.10    0.50
  -4   0  -3    0.20    0.50
  -6   0  -3    0.00    0.50
   6   0   3    0.10    0.40
  -6   0  -3    0.20    0.70
  -6   0  -3    0.70    0.40
   6   0   3   -1.10    0.60
   6   0   3   -0.10    0.50
  -6   0  -3   -0.10    0.80
   6   0   3    0.90    0.80
   6   0   3   -0.60    0.70
   8   0   3    0.70    0.70
  -8   0  -3   -0.50    0.40
   8   0   3    2.40    0.80
  -8   0  -3    0.70    0.70
  -8   0  -3    0.00    0.60
   8   0   3   -0.50    0.50
   8   0   3    0.40    0.50
   8   0   3   -0.30    0.40
  -8   0  -3    0.30    0.70
  10   0   3    2.60    0.90
  10   0   3    1.40    0.60
 -10   0  -3    0.50    0.60
 -10   0  -3   -0.30    0.70
  10   0   3    1.10    0.60
  10   0   3    1.00    0.70
  10   0   3    4.20    1.10
 -10   0  -3    2.20    0.90
 -10   0  -3    3.60    1.20
  12   0   3   -0.50    0.90
  12   0   3    1.00    0.90
 -12   0  -3   -0.40    0.60
 -12   0  -3   -0.60    0.90
 -12   0  -3    0.20    0.70
  12   0   3    0.00    0.60
  12   0   3    0.30    1.00
  12   0   3    0.40    0.90
 -12   0  -3    0.40    1.30
 -14   0  -3   -0.30    0.90
 -14   0  -3    1.50    0.80
  14   0   3    0.90    1.00
 -14   0  -3    0.40    0.90
  14   0   3   -0.20    0.90
  14   0   3   -0.70    0.80
  14   0   3   -1.10    1.10
  14   0   3   -1.10    0.90
 -14   0  -3    0.70    1.10
  16   0   3    0.30    1.00
 -16   0  -3    1.20    1.70
 -16   0  -3    0.70    1.10
 -16   0  -3    0.20    0.90
  16   0   3   -0.40    1.10
  16   0   3   -0.80    1.20
 -16   0  -3   -0.70    1.00
  16   0   3    0.70    0.70
  16   0   3    0.00    1.00
 -18   0  -3   -3.10    1.80
  18   0   3   -1.50    1.50
  18   0   3   -0.30    0.90
 -18   0  -3    0.50    1.20
  18   0   3   -2.80    1.10
  18   0   3   -0.20    0.90
 -18   0  -3   -1.40    0.80
  18   0   3   -1.90    1.30
 -20   0  -3   -0.60    1.50
  20   0   3   -0.70    0.90
 -20   0  -3   -0.50    0.90
 -20   0  -3   -2.60    1.30
  20   0   3    0.60    1.00
  20   0   3   -2.40    0.90
  20   0   3   -2.40    1.50
 -20   0  -3    0.40    1.00
 -22   0  -3   -1.30    1.30
  22   0   3   -0.70    1.40
  22   0   3   -1.40    1.60
  22   0   3    0.30    1.00
 -22   0  -3   -2.40    2.20
  22   0   3   -0.10    1.00
 -22   0  -3   -2.90    0.90
  22   0   3   -1.40    1.10
 -22   0  -3    0.40    0.90
  24   0   3   -1.20    1.00
 -24   0  -3   -0.70    1.70
 -24   0  -3    1.50    1.50
  24   0   3    0.40    1.40
  24   0   3   -0.10    1.60
 -24   0  -3   -3.40    2.40
 -24   0  -3   -0.40    1.10
  24   0   3    0.90    1.60
 -26   0  -3    0.40    1.60
 -26   0  -3   -1.50    1.80
  26   0   3    0.80    1.80
  26   0   3   -0.40    1.70
  26   0   3    3.60    2.20
  28   0   3    0.80    2.00
  28   0   3   -1.00    1.40
  28   0   3    0.70    2.20
 -28   0  -3   -0.70    1.30
 -28   0  -3   -0.70    1.60
 -30   0  -3   -2.00    2.20
 -30   0  -3   -1.10    1.30
  30   0   3    3.10    2.40
 -29  -1   3   -4.00    1.70
 -29  -1   3   -3.60    1.80
 -29  -1   3   -0.90    1.90
  29  -1  -3   -2.20    2.00
  29  -1  -3    2.80    2.50
 -29   1   3    0.30    1.90
 -29   1   3   -4.90    1.70
  29   1  -3   -2.40    1.90
  29   1  -3    0.20    1.80
 -27  -1   3   -1.60    1.70
  27  -1  -3    3.50    1.90
  27  -1  -3    1.60    1.90
 -27  -1   3   -1.20    1.70
  27  -1  -3   -2.20    1.80
 -27  -1   3   -1.30    1.70
  27   1  -3    1.60    2.00
 -27   1   3    1.40    2.10
 -27   1   3   -0.40    1.70
  27   1  -3    1.50    2.40
 -27   1   3   -0.80    1.70
 -25  -1   3    4.50    1.50
  25  -1  -3    5.10    1.60
 -25  -1   3    4.00    1.70
  25  -1  -3    5.00    1.80
 -25  -1   3    1.80    1.80
  25  -1  -3    5.80    2.00
 -25  -1   3    4.10    1.40
  25  -1  -3    6.40    2.00
  25   1  -3    4.10    1.40
 -25   1   3    6.90    1.90
 -25   1   3    5.20    1.70
  25   1  -3    2.50    1.80
 -25   1   3    5.50    1.50
  25   1  -3    7.40    2.50
  25   1  -3    4.50    1.50
 -25   1   3    4.50    1.80
 -23  -1   3    1.10    1.60
  23  -1  -3    0.70    1.90
 -23  -1   3    3.70    1.50
  23  -1  -3    2.30    1.50
  23  -1  -3    2.30    1.60
  23  -1  -3    3.00    1.50
 -23  -1   3    1.60    1.10
 -23  -1   3    4.50    1.60
  23   1  -3    3.60    1.70
 -23   1   3    3.10    1.60
  23   1  -3    1.90    1.20
  23   1  -3    5.00    1.60
 -23   1   3    0.60    1.30
 -23   1   3    1.30    1.10
  23   1  -3    1.20    2.00
 -23   1   3    2.60    1.50
  21  -1  -3   43.00    3.00
  21  -1  -3   37.40    2.60
  21  -1  -3   44.10    3.70
  21  -1  -3   37.30    2.50
 -21  -1   3   34.40    2.40
 -21  -1   3   42.00    2.90
 -21  -1   3   44.40    3.10
 -21  -1   3   41.70    2.90
  21   1  -3   43.60    3.70
  21   1  -3   38.50    2.60
  21   1  -3   41.30    3.10
  21   1  -3   39.20    2.90
 -21   1   3   39.50    2.60
 -21   1   3   44.30    2.70
 -21   1   3   34.50    2.90
 -21   1   3   38.30    2.40
  19  -1  -3   83.09    3.70
 -19  -1   3   86.69    3.80
 -19  -1   3   89.29    4.00
  19  -1  -3   88.59    3.90
 -19  -1   3   84.39    3.70
  19  -1  -3   91.89    5.00
  19  -1  -3   91.79    3.90
  19  -1  -3   86.19    4.50
 -19  -1   3   93.49    3.90
  19   1  -3   88.89    3.80
 -19   1   3   83.89    3.70
  19   1  -3   83.79    3.90
 -19   1   3   84.79    3.80
  19   1  -3   93.99    4.60
  19   1  -3   85.69    3.80
 -19   1   3   83.59    3.40
 -19   1   3   88.79    3.70
  17  -1  -3   71.89    3.60
  17  -1  -3   82.59    3.50
 -17  -1   3   81.69    3.50
 -17  -1   3   86.69    3.40
 -17  -1   3   82.59    3.40
  17  -1  -3   83.99    4.70
  17  -1  -3   81.19    3.40
  17  -1  -3   78.79    3.30
  17   1  -3   83.49    4.10
 -17   1   3   82.89    3.10
  17   1  -3   85.49    3.40
  17   1  -3   80.29    3.50
  17   1  -3   81.49    3.40
 -17   1   3   80.19    3.40
 -17   1   3   81.79    3.30
  17   1  -3   83.89    4.40
  15  -1  -3   19.70    1.70
 -15  -1   3   16.20    1.50
  15  -1  -3   17.40    1.50
  15  -1  -3   19.70    1.80
 -15  -1   3   18.10    1.70
  15  -1  -3   18.30    2.60
 -15  -1   3   18.20    1.70
  15  -1  -3   20.40    1.70
 -15  -1   3   21.40    1.70
  15   1  -3   18.70    1.70
  15   1  -3   17.40    1.40
 -15   1   3   17.40    1.60
  15   1  -3   19.00    2.60
 -15   1   3   19.00    1.60
 -15   1   3   19.60    1.50
  15   1  -3   18.20    1.50
  15   1  -3   17.40    2.20
 -15   1   3   15.50    1.70
  13  -1  -3  166.08    4.70
  13  -1  -3  151.88    4.70
  13  -1  -3  162.58    5.40
  13  -1  -3  159.08    4.80
 -13  -1   3  158.58    4.80
 -13  -1   3  149.99    4.60
  13  -1  -3  161.98    6.10
 -13  -1   3  158.98    4.70
 -13  -1   3  161.48    4.70
 -13   1   3  163.78    4.70
  13   1  -3  162.18    5.30
  13   1  -3  165.28    4.90
  13   1  -3  164.48    4.80
 -13   1   3  165.98    4.50
  13   1  -3  151.18    4.70
 -13   1   3  158.18    4.50
 -13   1   3  158.18    4.80
  13   1  -3  159.28    5.70
 -11  -1   3  216.48    5.70
  11  -1  -3  214.58    5.90
 -11  -1   3  205.68    5.70
  11  -1  -3  216.48    7.10
  11  -1  -3  214.18    5.70
 -11  -1   3  213.98    5.80
  11  -1  -3  215.28    6.30
  11  -1  -3  207.78    5.80
 -11  -1   3  220.58    5.80
  11   1  -3  217.78    5.80
  11   1  -3  210.88    5.80
 -11   1   3  211.78    5.50
 -11   1   3  214.78    5.70
 -11   1   3  219.48    5.60
 -11   1   3  219.88    5.90
  11   1  -3  215.38    6.90
  11   1  -3  216.08    6.30
  -9  -1   3   35.60    1.50
  -9  -1   3   36.30    1.60
  -9  -1   3   36.80    1.60
   9  -1  -3   36.40    1.60
   9  -1  -3   33.80    2.50
   9  -1  -3   37.60    1.90
   9  -1  -3   36.50    1.60
  -9  -1   3   36.30    1.60
   9  -1  -3   34.60    1.30
   9  -1  -3   36.50    1.70
   9   1  -3   35.60    1.60
  -9   1   3   38.60    1.50
  -9   1   3   39.90    1.70
   9   1  -3   35.30    2.60
   9   1  -3   34.40    1.60
  -9   1   3   35.60    1.30
  -9   1   3   36.40    1.40
   9   1  -3   42.70    2.00
  -7  -1   3  368.06    8.90
   7  -1  -3  365.46   10.10
   7  -1  -3  389.66    9.40
   7  -1  -3  371.66    9.00
  -7  -1   3  365.06    8.70
   7  -1  -3  375.16    9.00
  -7  -1   3  368.76    8.90
  -7  -1   3  370.16    8.90
   7   1  -3  363.16    9.00
  -7   1   3  367.26    9.00
   7   1  -3  363.56   10.00
   7   1  -3  357.26    9.20
  -7   1   3  369.96    8.60
  -7   1   3  366.96    8.80
   7   1  -3  371.96    8.90
   5  -1  -3   14.20    1.10
   5  -1  -3   14.90    0.90
  -5  -1   3   15.80    1.00
   5  -1  -3   15.80    0.90
  -5  -1   3   16.20    0.90
   5  -1  -3   13.20    1.70
  -5  -1   3   13.50    0.90
  -5   1   3   16.50    0.90
   5   1  -3   18.70    2.20
   5   1  -3   16.20    0.80
  -5   1   3   16.90    1.30
  -5   1   3   14.60    0.80
   5   1  -3   15.30    0.80
   5   1  -3   17.30    1.10
   3  -1  -3   59.49    1.80
  -3  -1   3   54.19    1.70
   3  -1  -3   54.69    2.50
  -3  -1   3   58.99    1.70
   3   1  -3   56.29    2.60
  -3   1   3   56.29    2.00
  -3   1   3   46.90    1.70
   3   1  -3   54.99    1.70
   1  -1  -3 3179.58   74.39
   1  -1  -3 3315.07   73.79
  -1  -1   3 3323.77   73.19
   1   1  -3 3318.87   78.89
   1   1  -3 2776.92   73.29
  -1   1   3 3191.88   75.09
   1  -1   3 1698.03   38.30
  -1  -1  -3 1656.93   40.00
  -1  -1  -3 1840.32   38.50
   1   1   3 1659.83   38.20
  -1   1  -3 1777.82   40.80
  -1   1  -3 1451.15   38.30
  -3  -1  -3 1197.78   27.50
  -3  -1  -3 1241.18   27.20
   3  -1   3 1198.58   27.00
   3  -1   3 1196.68   27.00
   3  -1   3 1056.09   26.90
  -3  -1  -3 1199.18   27.20
   3  -1   3 1260.07   28.70
   3   1   3 1096.29   27.10
   3   1   3 1193.18   27.40
  -3   1  -3 1217.48   27.10
  -3   1  -3 1239.58   28.20
   5  -1   3 1974.90   45.80
  -5  -1  -3 1829.22   43.70
  -5  -1  -3 2003.70   45.10
   5  -1   3 1835.82   42.90
   5  -1   3 1842.32   42.90
   5  -1   3 1824.52   42.80
  -5  -1  -3 2084.59   44.40
   5   1   3 1894.41   43.00
  -5   1  -3 1987.10   45.80
  -5   1  -3 1842.82   43.20
   5   1   3 1796.92   43.20
  -5   1  -3 1938.21   47.20
   5   1   3 1892.01   43.00
   5   1   3 1835.62   43.50
   7  -1   3   38.20    1.80
  -7  -1  -3   35.10    1.50
   7  -1   3   39.80    1.60
  -7  -1  -3   44.30    1.80
   7  -1   3   39.60    1.50
   7  -1   3   40.10    1.60
   7  -1   3   40.00    1.50
   7  -1   3   40.60    1.90
  -7  -1  -3   40.20    2.10
   7  -1   3   37.40    1.70
  -7   1  -3   39.60    1.90
  -7   1  -3   40.50    1.60
   7   1   3   38.60    1.50
  -7   1  -3   39.20    1.60
   7   1   3   40.30    1.60
  -7   1  -3   38.30    1.90
   7   1   3   39.70    1.60
   7   1   3   40.10    1.70
   7   1   3   41.10    2.10
   9  -1   3   63.79    2.30
   9  -1   3   61.29    2.50
  -9  -1  -3   60.39    2.30
  -9  -1  -3   61.59    2.80
   9  -1   3   61.79    2.30
   9  -1   3   56.99    2.30
  -9  -1  -3   57.59    2.10
   9  -1   3   61.29    2.70
   9  -1   3   58.19    2.10
   9  -1   3   58.29    2.10
   9   1   3   62.39    2.20
   9   1   3   63.19    2.30
  -9   1  -3   60.59    2.60
   9   1   3   58.79    2.20
  -9   1  -3   58.09    2.20
   9   1   3   59.59    2.70
   9   1   3   59.89    2.10
  -9   1  -3   59.79    2.70
  -9   1  -3   56.99    2.30
  11  -1   3   14.50    1.50
 -11  -1  -3    8.50    1.10
  11  -1   3   14.60    1.90
  11  -1   3   11.30    1.10
  11  -1   3   12.30    1.10
  11  -1   3    9.30    1.30
  11  -1   3   11.30    1.40
 -11  -1  -3   15.10    2.20
  11  -1   3   10.40    1.20
 -11  -1  -3   16.50    1.50
 -11   1  -3    9.00    1.20
  11   1   3   13.40    1.30
 -11   1  -3   15.30    1.90
 -11   1  -3   10.90    1.40
  11   1   3    9.40    1.00
  11   1   3   12.30    1.50
 -11   1  -3   12.60    1.10
  11   1   3   13.20    1.20
  11   1   3   11.60    1.20
 -13  -1  -3   25.50    1.50
  13  -1   3   24.30    1.90
  13  -1   3   22.60    1.50
  13  -1   3   24.60    1.80
 -13  -1  -3   26.00    2.00
  13  -1   3   25.20    1.90
  13  -1   3   28.20    2.40
  13  -1   3   27.60    1.60
  13  -1   3   25.80    1.70
 -13  -1  -3   21.40    1.50
 -13  -1  -3   26.80    2.60
  13   1   3   28.60    2.00
  13   1   3   23.20    1.60
  13   1   3   28.00    1.60
 -13   1  -3   25.10    2.30
 -13   1  -3   24.20    1.90
  13   1   3   28.50    2.30
 -13   1  -3   24.00    1.90
  13   1   3   25.20    1.60
 -13   1  -3   25.20    1.50
 -15  -1  -3   14.60    1.60
  15  -1   3   13.20    1.50
 -15  -1  -3   18.40    2.70
 -15  -1  -3   13.70    1.50
  15  -1   3   14.80    1.60
  15  -1   3   12.90    1.50
 -15  -1  -3   14.10    1.30
  15  -1   3   13.40    1.40
  15  -1   3   15.80    1.90
  15  -1   3   12.70    1.50
 -15   1  -3   13.50    1.60
  15   1   3   16.10    1.60
  15   1   3   14.20    1.60
 -15   1  -3   15.30    2.00
 -15   1  -3   16.10    1.40
  15   1   3   12.70    1.80
  15   1   3   13.30    1.40
  15   1   3   15.80    1.60
 -15   1  -3   11.90    1.50
 -17  -1  -3   16.40    1.80
  17  -1   3   12.10    1.50
 -17  -1  -3   12.70    1.50
  17  -1   3   15.00    1.70
 -17  -1  -3   14.40    1.70
 -17  -1  -3   15.30    2.60
  17  -1   3   11.30    1.70
  17  -1   3   14.40    2.00
  17  -1   3   15.10    1.70
  17   1   3   14.00    1.60
  17   1   3   13.30    1.70
  17   1   3   13.70    1.60
 -17   1  -3   12.60    1.50
 -17   1  -3   19.90    2.20
  17   1   3   14.70    1.70
 -17   1  -3   16.90    2.50
  17   1   3   13.30    2.20
 -17   1  -3   19.20    2.00
  19  -1   3   -0.90    1.30
  19  -1   3    0.10    0.90
  19  -1   3   -0.60    1.40
 -19  -1  -3   -2.10    1.30
  19  -1   3    2.20    1.30
 -19  -1  -3    1.40    1.00
 -19  -1  -3    0.10    1.20
 -19  -1  -3   -1.10    2.00
  19  -1   3   -1.30    1.40
  19   1   3   -0.40    1.30
 -19   1  -3   -0.60    0.90
  19   1   3   -0.40    1.30
 -19   1  -3   -1.30    2.00
 -19   1  -3   -3.00    1.30
 -19   1  -3    0.80    1.30
  19   1   3   -1.50    1.40
  19   1   3    1.50    1.30
  19   1   3   -1.50    0.90
  21  -1   3   -1.90    1.40
  21  -1   3   -0.40    1.00
 -21  -1  -3   -0.40    2.20
 -21  -1  -3    0.20    1.10
  21  -1   3    1.10    1.10
 -21  -1  -3    0.60    1.40
  21  -1   3   -0.10    1.50
 -21  -1  -3    2.10    1.00
  21  -1   3    1.70    1.40
 -21   1  -3    1.70    1.10
  21   1   3    0.90    1.40
  21   1   3    1.00    1.00
 -21   1  -3    0.00    1.00
  21   1   3    0.20    1.40
 -21   1  -3    1.00    2.20
 -21   1  -3   -0.40    1.40
  21   1   3    0.00    1.50
  23  -1   3    5.60    1.80
  23  -1   3    5.90    2.00
 -23  -1  -3    7.60    1.90
 -23  -1  -3    4.10    2.80
  23  -1   3    7.40    2.10
 -23  -1  -3    7.20    1.60
 -23  -1  -3    6.00    1.30
  23  -1   3    8.70    1.60
  23  -1   3    8.30    1.60
  23   1   3    8.00    1.60
  23   1   3    6.50    1.50
  23   1   3    9.40    1.90
 -23   1  -3    8.80    2.00
 -23   1  -3    6.40    1.80
  23   1   3    7.30    1.90
 -23   1  -3   10.00    1.60
 -23   1  -3    6.20    2.80
 -25  -1  -3    2.60    1.60
  25  -1   3    2.00    1.50
  25  -1   3    1.90    2.00
  25  -1   3    1.90    1.30
  25  -1   3    2.00    1.30
  25  -1   3    0.00    1.80
 -25  -1  -3    1.00    1.40
 -25   1  -3    0.20    1.80
  25   1   3    2.40    2.10
 -25   1  -3    1.60    1.60
  25   1   3   -0.30    1.70
  25   1   3    1.10    1.80
 -27  -1  -3    4.20    1.80
  27  -1   3    2.10    2.20
 -27  -1  -3    1.40    2.10
  27  -1   3    1.10    1.90
  27  -1   3    3.00    2.00
 -27   1  -3    1.90    1.80
  27   1   3    3.20    2.00
  27   1   3    1.00    1.90
 -27   1  -3   -1.20    2.00
  27   1   3    2.70    2.40
 -29  -1  -3    0.30    1.40
 -29  -1  -3    0.60    1.70
  29  -1   3    3.30    2.30
  29  -1   3   -0.40    2.10
  29  -1   3    1.80    1.50
 -29   1  -3    0.10    1.40
  29   1   3    2.30    1.60
 -29   1  -3   -1.40    1.50
 -29   1  -3    1.20    1.90
  29   1   3    3.60    2.60
  29   1   3    1.30    1.60
 -30  -2   3   -0.10    2.20
  30  -2  -3   -0.10    1.60
 -30  -2   3   -0.50    1.90
 -30  -2   3   -0.30    2.00
  30  -2  -3    6.60    2.60
  30   2  -3    3.20    2.80
 -30   2   3    1.80    1.70
 -30   2   3   -0.60    2.00
  30   2  -3   -1.50    2.10
 -28  -2   3   -1.10    2.00
  28  -2  -3    3.60    2.00
  28  -2  -3   -2.00    1.90
 -28  -2   3   -0.10    1.40
  28  -2  -3   -0.40    2.00
 -28  -2   3   -0.90    1.80
 -28   2   3   -2.90    1.80
 -28   2   3   -0.60    1.90
  28   2  -3    0.70    1.90
  28   2  -3    0.40    2.00
  26  -2  -3   -0.20    1.80
 -26  -2   3    0.30    1.70
 -26  -2   3   -0.10    1.60
 -26  -2   3    0.60    1.90
  26  -2  -3    2.80    1.90
  26  -2  -3    3.20    2.30
 -26   2   3   -1.40    1.60
  26   2  -3    0.50    2.30
  26   2  -3    0.70    1.90
 -26   2   3   -0.90    1.80
  24  -2  -3   12.50    2.60
 -24  -2   3   10.00    2.00
 -24  -2   3    8.80    1.90
 -24  -2   3   10.60    2.10
  24  -2  -3   10.30    2.00
  24  -2  -3   10.80    1.80
 -24  -2   3    7.00    1.60
  24  -2  -3    8.80    1.90
  24   2  -3    6.00    1.50
  24   2  -3   10.10    2.60
 -24   2   3    8.50    1.70
 -24   2   3    7.70    1.90
  24   2  -3   12.20    2.20
 -24   2   3    8.40    1.70
 -24   2   3    9.90    1.90
 -22  -2   3   11.20    2.00
  22  -2  -3   12.00    1.70
 -22  -2   3   10.60    1.80
  22  -2  -3    9.00    1.50
  22  -2  -3   13.00    2.50
  22  -2  -3   12.60    2.00
 -22  -2   3    9.90    1.60
 -22  -2   3    9.50    1.60
  22   2  -3   11.40    2.10
  22   2  -3   11.10    1.60
 -22   2   3   12.50    1.60
 -22   2   3    8.40    1.90
 -22   2   3   10.60    1.60
  22   2  -3   14.20    2.10
  22   2  -3   10.90    1.70
 -22   2   3   12.20    1.80
 -20  -2   3   -3.50    1.30
  20  -2  -3    0.00    1.30
  20  -2  -3   -2.00    1.10
  20  -2  -3   -1.70    0.90
 -20  -2   3    0.70    1.00
  20  -2  -3   -0.20    2.10
 -20  -2   3   -0.60    1.20
 -20  -2   3    0.10    0.90
  20  -2  -3   -1.00    1.20
  20   2  -3   -3.00    1.50
 -20   2   3   -0.50    0.90
  20   2  -3   -1.70    1.20
  20   2  -3   -0.80    0.90
 -20   2   3   -1.00    1.10
 -20   2   3   -1.00    1.10
 -20   2   3   -0.40    1.30
  20   2  -3   -0.20    1.00
  18  -2  -3    1.00    1.20
 -18  -2   3   -1.90    1.10
 -18  -2   3   -2.20    1.10
  18  -2  -3   -0.20    0.90
  18  -2  -3    0.70    1.80
 -18  -2   3    0.20    1.10
  18  -2  -3   -3.00    1.10
  18  -2  -3   -0.20    0.80
 -18  -2   3   -1.30    1.30
  18   2  -3   -0.50    1.50
 -18   2   3    0.50    0.90
  18   2  -3   -2.00    1.10
  18   2  -3    0.80    1.00
 -18   2   3    1.00    1.00
 -18   2   3    1.10    0.80
  18   2  -3   -1.60    1.10
  16  -2  -3   -0.30    1.20
 -16  -2   3   -0.70    0.70
 -16  -2   3    0.10    0.80
  16  -2  -3   -0.10    0.90
  16  -2  -3   -1.20    0.90
  16  -2  -3    1.60    1.00
 -16  -2   3    0.40    0.70
 -16  -2   3    0.00    1.00
  16  -2  -3   -1.80    1.50
 -16   2   3    0.40    1.00
 -16   2   3    1.20    0.90
 -16   2   3   -0.50    0.80
  16   2  -3   -1.20    0.60
  16   2  -3   -0.40    1.60
  16   2  -3   -0.50    0.70
  16   2  -3    0.30    0.70
  16   2  -3   -0.50    1.00
  14  -2  -3    3.60    0.80
  14  -2  -3    3.40    0.90
  14  -2  -3    4.60    0.90
 -14  -2   3    3.30    1.00
  14  -2  -3    3.00    0.90
 -14  -2   3    4.50    1.10
  14  -2  -3    2.90    1.00
 -14  -2   3    3.50    1.10
  14  -2  -3    2.80    1.70
 -14  -2   3    4.20    0.90
 -14   2   3    3.40    0.80
  14   2  -3    3.90    1.00
 -14   2   3    3.80    0.90
  14   2  -3    5.20    1.90
 -14   2   3    4.20    0.80
 -14   2   3    3.50    0.90
  14   2  -3    4.50    0.90
  14   2  -3    3.70    1.10
  12  -2  -3  100.49    3.20
  12  -2  -3  107.19    4.90
 -12  -2   3  101.89    3.40
  12  -2  -3  104.09    3.90
 -12  -2   3  108.99    3.60
 -12  -2   3  107.59    3.50
  12  -2  -3  101.19    3.40
  12  -2  -3  107.99    3.30
  12  -2  -3  107.49    3.50
 -12  -2   3  103.09    3.40
  12  -2  -3  106.29    3.10
  12   2  -3  106.09    3.40
 -12   2   3  109.59    3.60
  12   2  -3  108.49    4.50
  12   2  -3  105.69    3.40
  12   2  -3  111.39    4.10
 -12   2   3  104.19    3.20
 -12   2   3  105.89    3.10
 -12   2   3  102.59    3.20
  10  -2  -3   26.20    1.70
  10  -2  -3   25.60    1.20
  10  -2  -3   26.20    1.40
 -10  -2   3   25.90    1.50
  10  -2  -3   26.50    1.40
 -10  -2   3   27.90    1.60
 -10  -2   3   28.20    1.60
 -10  -2   3   25.50    1.30
  10  -2  -3   25.40    1.40
  10  -2  -3   24.70    1.20
  10  -2  -3   25.50    2.30
  10   2  -3   25.20    1.30
 -10   2   3   24.50    1.30
  10   2  -3   24.20    1.50
  10   2  -3   25.20    1.70
  10   2  -3   25.30    2.60
 -10   2   3   27.90    1.90
 -10   2   3   26.90    1.30
 -10   2   3   25.50    1.20
 -10   2   3   26.70    1.50
   8  -2  -3   60.19    2.10
   8  -2  -3   60.79    1.80
  -8  -2   3   57.39    2.10
   8  -2  -3   58.79    2.00
  -8  -2   3   61.89    2.20
   8  -2  -3   58.99    2.50
  -8  -2   3   57.99    2.10
   8  -2  -3   61.49    1.90
   8  -2  -3   60.39    2.20
  -8  -2   3   59.99    2.10
  -8   2   3   63.29    2.60
  -8   2   3   62.39    2.00
  -8   2   3   60.09    2.20
  -8   2   3   58.89    1.80
   8   2  -3   59.59    2.10
   8   2  -3   60.29    2.10
   8   2  -3   57.19    3.30
   8   2  -3   57.39    2.40
  -6  -2   3  202.08    5.10
   6  -2  -3  198.18    5.20
   6  -2  -3  201.98    5.70
  -6  -2   3  202.78    5.20
  -6  -2   3  201.58    5.20
  -6  -2   3  196.98    5.20
   6  -2  -3  203.28    4.80
   6  -2  -3  197.88    6.50
   6  -2  -3  196.78    5.00
   6  -2  -3  189.08    5.20
   6   2  -3  193.98    6.30
  -6   2   3  206.88    5.00
  -6   2   3  199.88    5.30
   6   2  -3  231.98    5.60
  -6   2   3  207.48    5.80
   6   2  -3  204.88    5.10
   6   2  -3  197.48    5.10
  -6   2   3  205.38    4.80
   4  -2  -3 1795.32   42.00
   4  -2  -3 1729.23   42.70
   4  -2  -3 1796.72   41.20
  -4  -2   3 1775.22   40.60
  -4  -2   3 2022.50   41.30
   4  -2  -3 1736.43   40.60
  -4  -2   3 1789.62   40.60
   4   2  -3 1931.91   43.00
  -4   2   3 1778.52   40.70
   4   2  -3 1713.53   40.90
   4   2  -3 1707.13   41.80
  -4   2   3 1771.12   41.20
   2  -2  -3 1311.87   30.30
  -2  -2   3 1268.07   29.80
   2  -2  -3 1374.46   29.80
  -2  -2   3 1384.26   29.80
   2  -2  -3 1353.66   30.10
   2  -2  -3 1256.97   30.80
   2   2  -3 1340.97   31.00
  -2   2   3 1123.39   29.80
  -2   2   3 1382.46   30.40
   2   2  -3 1332.37   29.70
   0  -2   3    1.30    0.40
   0  -2  -3    0.70    0.60
   0  -2  -3    2.60    0.30
   0  -2   3    1.40    0.50
   0  -2  -3    1.50    0.70
   0  -2  -3    1.10    0.50
   0  -2   3    1.40    0.40
   0  -2   3    1.80    0.40
   0   2   3    2.00    0.70
   0   2   3    1.30    0.40
   0   2  -3    1.30    0.40
   2  -2   3  250.87    5.90
  -2  -2  -3  253.27    6.70
   2  -2   3  246.28    6.40
   2  -2   3  257.07    6.10
  -2  -2  -3  260.37    6.00
   2  -2   3  257.57    6.20
  -2  -2  -3  256.27    6.20
  -2   2  -3  244.48    7.00
   2   2   3  218.78    6.20
  -2   2  -3  258.67    6.10
   2   2   3  256.37    6.70
   4  -2   3   94.09    3.40
  -4  -2  -3   96.99    2.90
  -4  -2  -3   95.29    3.30
   4  -2   3   96.39    2.60
   4  -2   3   93.59    2.50
   4  -2   3   94.49    3.00
   4  -2   3   92.19    2.70
  -4  -2  -3   96.19    2.70
   4  -2   3   97.49    2.70
   4   2   3  101.29    2.70
   4   2   3   96.29    3.40
  -4   2  -3   95.69    2.80
  -4   2  -3   94.59    3.50
   4   2   3   94.99    2.90
   4   2   3   90.79    2.60
   6  -2   3  126.79    3.50
   6  -2   3  127.79    4.30
  -6  -2  -3  129.09    3.60
   6  -2   3  127.89    3.50
   6  -2   3  133.89    3.60
  -6  -2  -3  133.19    3.80
  -6  -2  -3  129.99    4.40
   6  -2   3  137.99    3.50
   6  -2   3  130.99    4.00
   6   2   3  125.89    4.20
   6   2   3  129.59    3.60
   6   2   3  129.79    3.50
  -6   2  -3  130.79    4.10
  -6   2  -3  133.99    3.70
   6   2   3  126.89    3.70
  -6   2  -3  127.79    4.40
  -8  -2  -3  166.78    4.70
   8  -2   3  166.58    5.20
  -8  -2  -3  162.58    5.30
   8  -2   3  166.78    4.60
   8  -2   3  166.08    4.50
   8  -2   3  163.68    4.50
  -8  -2  -3  161.78    4.50
   8  -2   3  163.28    5.00
   8  -2   3  165.58    4.40
   8  -2   3  160.98    4.50
   8   2   3  167.18    4.60
  -8   2  -3  166.38    5.10
   8   2   3  170.58    4.70
   8   2   3  167.48    4.50
   8   2   3  156.38    5.00
  -8   2  -3  172.88    4.70
   8   2   3  167.08    4.50
  -8   2  -3  165.08    5.30
 -10  -2  -3   41.90    1.90
  10  -2   3   38.70    2.00
  10  -2   3   39.70    1.70
  10  -2   3   43.30    1.90
  10  -2   3   43.10    2.40
  10  -2   3   43.70    2.00
 -10  -2  -3   35.20    1.90
 -10  -2  -3   38.40    2.80
  10  -2   3   40.90    1.80
  10  -2   3   44.50    2.40
  10   2   3   42.20    1.90
  10   2   3   40.10    1.80
 -10   2  -3   42.50    2.00
  10   2   3   41.40    2.00
  10   2   3   34.60    1.90
  10   2   3   41.30    2.60
 -10   2  -3   40.80    2.40
 -10   2  -3   41.60    1.80
 -10   2  -3   40.10    2.50
 -12  -2  -3   79.49    4.00
  12  -2   3   83.79    3.10
  12  -2   3   82.39    2.90
 -12  -2  -3   83.39    3.20
 -12  -2  -3   78.69    3.00
  12  -2   3   84.19    3.20
  12  -2   3   80.79    3.50
  12  -2   3   79.69    2.90
  12  -2   3   82.79    2.90
  12  -2   3   82.89    3.60
 -12  -2  -3   80.99    2.80
 -12   2  -3   85.59    3.20
  12   2   3   84.69    3.10
  12   2   3   85.19    3.70
 -12   2  -3   83.29    3.60
  12   2   3   81.09    2.80
 -12   2  -3   82.79    3.60
  12   2   3   87.79    3.20
  12   2   3   81.79    3.10
 -12   2  -3   79.19    2.90
  14  -2   3    0.20    1.40
  14  -2   3    0.20    0.90
  14  -2   3   -0.30    0.90
  14  -2   3    0.10    0.90
 -14  -2  -3    0.70    1.70
  14  -2   3   -0.80    0.80
  14  -2   3   -0.40    0.90
 -14  -2  -3   -0.80    0.90
  14  -2   3    0.20    1.00
 -14  -2  -3   -0.20    0.80
 -14  -2  -3   -0.50    0.70
 -14   2  -3    0.70    1.10
  14   2   3   -1.00    0.90
 -14   2  -3    0.00    1.30
  14   2   3   -0.60    1.40
  14   2   3    1.10    0.80
  14   2   3   -1.60    0.80
 -14   2  -3   -0.40    0.90
 -14   2  -3   -0.30    0.90
  16  -2   3   19.40    2.00
  16  -2   3   24.30    2.80
  16  -2   3   24.00    2.20
  16  -2   3   24.70    2.00
 -16  -2  -3   24.40    2.10
 -16  -2  -3   23.40    3.30
  16  -2   3   25.40    2.10
 -16  -2  -3   22.20    2.20
 -16  -2  -3   24.20    1.70
  16  -2   3   24.00    2.20
  16   2   3   23.00    2.90
  16   2   3   24.10    2.20
 -16   2  -3   21.90    2.80
 -16   2  -3   23.40    2.20
  16   2   3   20.70    1.80
  16   2   3   28.00    2.00
 -16   2  -3   20.60    1.90
 -16   2  -3   20.70    2.00
 -18  -2  -3   82.19    4.50
  18  -2   3   89.49    4.60
  18  -2   3   77.99    3.40
 -18  -2  -3   83.09    3.70
  18  -2   3   87.39    3.90
  18  -2   3   81.39    3.40
  18  -2   3   89.49    4.10
 -18  -2  -3   80.39    3.40
 -18  -2  -3   87.59    4.00
  18  -2   3   92.89    3.70
 -18   2  -3   76.89    3.40
 -18   2  -3   89.89    4.00
  18   2   3   89.19    4.60
  18   2   3   80.79    3.40
 -18   2  -3   96.09    4.70
  18   2   3   80.29    3.80
  18   2   3   86.19    4.00
 -18   2  -3   77.79    3.40
  20  -2   3   -0.30    1.00
  20  -2   3    0.40    1.20
  20  -2   3    0.60    1.10
  20  -2   3    1.50    1.40
 -20  -2  -3    0.90    1.30
 -20  -2  -3    0.40    1.00
 -20  -2  -3    0.50    1.60
 -20  -2  -3    1.40    1.50
  20  -2   3    0.20    1.50
 -20   2  -3   -0.20    1.40
  20   2   3   -0.20    1.00
  20   2   3   -0.40    1.30
 -20   2  -3   -0.70    2.00
 -20   2  -3    1.30    1.00
  20   2   3   -2.70    1.30
  20   2   3   -0.40    1.40
 -20   2  -3   -0.70    0.90
  22  -2   3   13.30    2.20
  22  -2   3   11.30    1.90
 -22  -2  -3    8.50    1.90
 -22  -2  -3   10.20    1.70
  22  -2   3    8.10    1.60
 -22  -2  -3   10.80    2.00
 -22  -2  -3   10.30    2.90
  22  -2   3    7.30    1.80
  22  -2   3    9.40    1.50
 -22   2  -3    9.90    1.70
 -22   2  -3    7.00    2.70
  22   2   3    9.40    1.60
 -22   2  -3    9.30    1.70
  22   2   3    8.10    1.90
 -22   2  -3    9.00    1.80
  22   2   3   10.40    2.10
  22   2   3   11.30    1.90
 -24  -2  -3    1.30    1.30
  24  -2   3    0.40    1.40
  24  -2   3    3.60    1.70
 -24  -2  -3    2.00    2.70
 -24  -2  -3    2.00    1.40
  24  -2   3    1.20    1.30
 -24  -2  -3    1.80    1.20
  24  -2   3    4.20    1.90
  24  -2   3    2.50    1.70
 -24   2  -3    0.40    2.90
 -24   2  -3    1.70    1.60
  24   2   3    2.00    1.30
 -24   2  -3    3.00    1.60
 -24   2  -3    1.30    1.40
  24   2   3    4.60    2.30
  24   2   3    4.40    1.80
  24   2   3   -0.30    1.20
  26  -2   3    2.70    1.80
  26  -2   3    2.50    1.40
  26  -2   3    5.80    2.10
 -26  -2  -3    4.80    1.90
 -26  -2  -3    0.40    1.40
  26  -2   3   -1.30    1.90
 -26   2  -3    0.70    1.90
 -26   2  -3    3.40    1.50
  26   2   3    3.30    2.00
  26   2   3    2.00    1.90
  26   2   3    2.80    2.30
  28  -2   3   10.90    2.60
  28  -2   3    4.00    1.70
 -28  -2  -3    4.50    1.70
  28  -2   3    8.80    2.20
 -28  -2  -3    8.00    2.50
  28   2   3    3.80    1.70
 -28   2  -3    2.90    1.50
  28   2   3    6.60    2.30
 -28   2  -3    4.30    2.10
  28   2   3    9.20    2.80
 -28   2  -3    6.90    2.30
  29  -3  -3    7.20    2.70
 -29  -3   3    1.60    2.20
 -29  -3   3   -2.10    1.80
  29  -3  -3   -1.40    1.50
 -29  -3   3   -1.10    2.00
  29  -3  -3   -0.50    1.50
  29   3  -3    1.00    2.20
 -29   3   3   -1.10    3.00
  29   3  -3    3.90    2.20
 -29   3   3   -0.30    1.90
 -29   3   3   -1.10    1.40
  27  -3  -3   -1.00    1.90
 -27  -3   3   -0.60    1.90
  27  -3  -3    4.60    2.50
  27  -3  -3   -1.70    1.20
 -27  -3   3   -1.30    2.00
 -27  -3   3    0.10    1.80
 -27   3   3   -2.40    2.70
  27   3  -3    2.50    2.10
 -27   3   3   -2.50    1.80
 -27   3   3    1.10    1.80
  27   3  -3    2.20    2.50
  25  -3  -3    6.70    2.40
  25  -3  -3    1.60    1.30
 -25  -3   3    3.90    1.70
  25  -3  -3    0.60    1.80
  25  -3  -3    1.10    1.20
 -25  -3   3    0.70    1.30
 -25  -3   3   -1.40    1.80
 -25  -3   3    1.10    1.70
 -25   3   3    2.40    1.30
 -25   3   3    1.40    1.20
  25   3  -3    3.00    1.90
  25   3  -3    2.60    1.60
  25   3  -3    1.10    1.80
 -25   3   3    2.90    2.70
 -25   3   3    1.30    1.80
  23  -3  -3    8.20    1.90
  23  -3  -3    4.70    1.70
  23  -3  -3    7.00    1.80
 -23  -3   3    7.20    1.90
 -23  -3   3    8.30    2.10
  23  -3  -3    8.50    2.00
 -23  -3   3    6.60    1.80
 -23  -3   3    6.30    1.50
 -23   3   3    6.00    1.40
  23   3  -3    6.40    1.90
 -23   3   3    7.00    2.30
  23   3  -3    3.60    1.30
  23   3  -3   10.10    2.60
 -23   3   3    7.30    1.90
 -23   3   3    3.50    1.60
 -21  -3   3    1.60    1.30
  21  -3  -3   -0.90    1.30
 -21  -3   3    1.70    1.50
 -21  -3   3    0.20    1.30
  21  -3  -3    0.80    1.80
  21  -3  -3   -1.50    1.20
  21  -3  -3   -0.70    1.00
 -21  -3   3   -1.40    1.50
 -21   3   3    1.30    1.20
 -21   3   3   -1.80    1.30
  21   3  -3   -0.40    1.40
  21   3  -3    0.30    1.40
  21   3  -3    0.10    1.00
 -21   3   3   -0.20    1.20
 -21   3   3   -0.80    1.20
 -19  -3   3    2.80    1.30
 -19  -3   3    0.70    1.50
  19  -3  -3    2.20    2.20
  19  -3  -3    1.30    1.30
 -19  -3   3    3.10    1.40
  19  -3  -3    2.00    1.40
  19  -3  -3    3.60    1.20
 -19  -3   3    4.80    1.10
  19  -3  -3    3.70    1.10
 -19   3   3    3.60    1.70
 -19   3   3    4.50    1.30
  19   3  -3    3.50    1.10
 -19   3   3    2.70    1.30
  19   3  -3    4.40    1.90
 -19   3   3    2.80    1.20
 -19   3   3    1.00    1.30
  19   3  -3    1.60    1.30
  17  -3  -3   34.40    2.20
 -17  -3   3   33.70    2.60
 -17  -3   3   37.70    2.40
 -17  -3   3   35.60    2.40
  17  -3  -3   37.40    3.80
  17  -3  -3   38.60    2.50
 -17  -3   3   36.40    2.50
  17  -3  -3   37.10    3.10
  17  -3  -3   34.70    2.20
  17  -3  -3   37.70    2.00
  17   3  -3   33.80    2.40
  17   3  -3   39.40    3.20
 -17   3   3   38.20    2.00
 -17   3   3   40.40    2.50
  17   3  -3   37.80    2.50
 -17   3   3   38.00    2.20
 -17   3   3   40.50    3.50
 -15  -3   3   44.10    2.20
  15  -3  -3   43.50    2.00
  15  -3  -3   48.90    2.80
  15  -3  -3   44.10    2.40
 -15  -3   3   45.70    2.50
  15  -3  -3   41.80    2.20
  15  -3  -3   42.40    2.20
  15  -3  -3   40.80    3.80
 -15  -3   3   44.00    2.20
  15  -3  -3   43.10    2.70
 -15  -3   3   45.90    2.50
  15   3  -3   48.40    2.40
  15   3  -3   46.30    3.70
 -15   3   3   45.90    2.30
 -15   3   3   50.49    3.30
  15   3  -3   44.90    2.20
  15   3  -3   42.00    2.70
 -15   3   3   44.00    2.00
 -15   3   3   48.50    2.30
 -15   3   3   45.70    2.20
  13  -3  -3    4.30    0.90
 -13  -3   3    4.50    0.80
  13  -3  -3    3.20    1.20
 -13  -3   3    3.60    1.10
  13  -3  -3    4.10    0.90
 -13  -3   3    3.70    0.80
  13  -3  -3    3.50    1.50
  13  -3  -3    3.40    0.70
  13  -3  -3    2.90    0.90
 -13  -3   3    4.00    1.00
  13  -3  -3    3.60    1.00
 -13   3   3    4.10    1.00
  13   3  -3    3.80    0.80
 -13   3   3    5.60    0.80
  13   3  -3    3.90    0.80
  13   3  -3    5.90    2.20
 -13   3   3    2.90    0.80
 -13   3   3    3.90    1.40
 -13   3   3    4.60    0.90
  13   3  -3    3.60    1.30
  11  -3  -3   57.39    2.30
  11  -3  -3   58.59    2.20
  11  -3  -3   61.29    2.40
 -11  -3   3   60.89    2.30
  11  -3  -3   53.99    3.40
  11  -3  -3   58.79    2.00
 -11  -3   3   60.29    2.60
 -11  -3   3   58.09    2.50
  11  -3  -3   60.19    2.20
 -11  -3   3   60.39    2.40
  11  -3  -3   62.59    3.00
 -11   3   3   59.89    2.00
  11   3  -3   57.99    2.30
 -11   3   3   56.29    2.30
  11   3  -3   58.59    2.30
 -11   3   3   57.29    2.10
  11   3  -3   56.39    2.90
 -11   3   3   63.09    3.10
  11   3  -3   61.69    3.80
   9  -3  -3  131.39    3.40
  -9  -3   3  122.89    3.70
   9  -3  -3  127.39    3.80
  -9  -3   3  124.99    4.00
  -9  -3   3  136.89    3.70
   9  -3  -3  125.49    4.40
  -9  -3   3  131.99    3.90
   9  -3  -3  123.89    3.80
   9  -3  -3  119.09    5.10
   9  -3  -3  126.09    3.50
   9  -3  -3  130.59    3.70
  -9   3   3  125.69    3.80
   9   3  -3  129.39    5.30
  -9   3   3  125.19    3.50
  -9   3   3  131.09    4.60
   9   3  -3  135.89    4.30
  -9   3   3  127.69    3.30
   9   3  -3  125.49    3.70
   9   3  -3  127.19    3.70
   7  -3  -3  364.66    9.10
  -7  -3   3  363.96    9.00
  -7  -3   3  369.66    9.30
  -7  -3   3  380.06    8.90
  -7  -3   3  372.26    9.20
   7  -3  -3  360.06   10.70
   7  -3  -3  376.86    8.60
   7  -3  -3  362.46    9.80
   7  -3  -3  368.96    9.00
   7  -3  -3  373.96    9.00
   7   3  -3  359.16   10.50
   7   3  -3  373.46    8.90
  -7   3   3  377.36    9.90
   7   3  -3  375.16    9.40
  -7   3   3  374.46    8.60
  -7   3   3  366.06    8.80
   7   3  -3  364.86    9.00
  -7   3   3  373.56    9.20
   5  -3  -3    2.20    0.60
   5  -3  -3    1.80    1.20
  -5  -3   3    2.80    0.40
  -5  -3   3    3.10    0.60
  -5  -3   3    2.90    0.70
  -5  -3   3    2.40    0.70
   5  -3  -3    3.10    0.50
   5  -3  -3    4.00    0.40
   5  -3  -3    3.40    0.80
   5   3  -3    2.60    0.40
   5   3  -3    2.20    0.80
  -5   3   3    3.30    0.60
   5   3  -3    2.80    0.40
  -5   3   3    3.20    0.80
  -5   3   3    3.40    0.40
   3  -3  -3  327.37    9.30
   3  -3  -3  332.67    7.90
  -3  -3   3  333.77    8.00
   3  -3  -3  329.87    8.30
  -3  -3   3  325.47    8.30
  -3  -3   3  328.47    8.10
   3  -3  -3  321.37    8.70
  -3  -3   3  341.87    7.70
  -3   3   3  322.57    8.80
   3   3  -3  332.87    9.40
  -3   3   3  335.17    8.10
   3   3  -3  332.27    7.70
  -3   3   3  328.57    7.60
   3   3  -3  334.27    8.10
   3   3  -3  328.67    7.80
  -1  -3   3  450.75   10.70
   1  -3  -3  467.85   10.40
   1  -3  -3  453.05   10.70
   1  -3  -3  452.45   11.20
  -1  -3   3  458.55   10.80
  -1  -3   3  463.45   11.10
   1  -3  -3  452.55   11.90
   1   3  -3  449.16   10.70
  -1   3   3  450.45   11.50
  -1   3   3  460.95   10.80
   1   3  -3  450.85   10.60
   1   3  -3  449.26   12.00
  -1  -3  -3  655.13   14.80
   1  -3   3  655.33   15.40
  -1  -3  -3  609.04   15.90
   1  -3   3  655.23   14.90
  -1  -3  -3  659.93   15.70
  -1  -3  -3  665.33   15.00
   1  -3   3  656.53   15.10
  -1   3  -3  647.04   14.80
   1   3   3  652.53   15.10
  -1   3  -3  654.13   16.30
   1   3   3  581.54   14.60
   1   3   3  648.24   15.80
   3  -3   3  144.99    4.20
  -3  -3  -3  141.59    4.50
  -3  -3  -3  146.79    3.90
  -3  -3  -3  145.09    3.80
   3  -3   3  148.09    3.90
   3  -3   3  139.59    3.80
   3  -3   3  143.89    3.50
   3  -3   3  142.79    4.80
  -3  -3  -3  139.59    4.40
   3   3   3  147.49    4.00
   3   3   3  144.19    4.60
   3   3   3  146.29    3.60
  -3   3  -3  143.29    3.70
  -3   3  -3  146.19    3.80
  -3   3  -3  141.29    4.90
   5  -3   3  339.67    8.50
   5  -3   3  356.26    8.50
  -5  -3  -3  355.56    8.60
   5  -3   3  355.66    8.40
   5  -3   3  351.66    9.10
  -5  -3  -3  352.76    8.90
   5  -3   3  353.16    8.70
  -5  -3  -3  361.66    8.70
  -5  -3  -3  362.26    9.60
   5  -3   3  343.67    9.70
  -5   3  -3  366.06    8.60
   5   3   3  350.76    9.40
  -5   3  -3  355.86    9.90
   5   3   3  353.26    8.70
   5   3   3  358.86    8.40
  -5   3  -3  360.96    8.60
  -7  -3  -3  282.07    7.30
   7  -3   3  286.67    7.30
  -7  -3  -3  297.57    7.50
   7  -3   3  298.77    7.20
  -7  -3  -3  289.07    7.40
   7  -3   3  302.67    7.40
   7  -3   3  295.87    7.90
  -7  -3  -3  292.37    8.40
   7  -3   3  290.97    8.50
   7  -3   3  296.77    7.40
   7   3   3  298.47    7.50
  -7   3  -3  297.27    8.70
   7   3   3  290.27    8.30
  -7   3  -3  304.97    7.50
   7   3   3  292.67    7.40
  -7   3  -3  311.87    7.50
   7   3   3  298.57    7.30
   9  -3   3   16.50    1.20
   9  -3   3   14.60    1.30
  -9  -3  -3   14.90    1.40
  -9  -3  -3   13.10    1.30
   9  -3   3   17.10    1.10
   9  -3   3   16.00    1.90
   9  -3   3   16.00    1.30
   9  -3   3   14.80    1.30
  -9  -3  -3   15.80    1.00
   9  -3   3   15.80    1.60
  -9  -3  -3   13.70    2.00
   9   3   3   17.40    1.40
   9   3   3   15.70    1.00
   9   3   3   16.20    1.40
  -9   3  -3   15.50    1.90
   9   3   3   15.40    2.10
  -9   3  -3   16.80    1.30
  -9   3  -3   12.70    1.60
  11  -3   3   16.60    1.10
  11  -3   3   18.50    1.50
  11  -3   3   18.90    2.00
  11  -3   3   17.60    1.30
  11  -3   3   18.20    1.40
  11  -3   3   20.10    1.50
  11  -3   3   17.10    2.00
 -11  -3  -3   16.10    2.20
 -11  -3  -3   18.20    1.60
 -11  -3  -3   17.80    1.20
 -11  -3  -3   19.30    1.60
  11   3   3   19.80    2.00
  11   3   3   19.60    1.60
 -11   3  -3   18.50    1.50
 -11   3  -3   19.30    2.10
 -11   3  -3   18.20    2.00
  11   3   3   19.90    1.60
  11   3   3   17.20    1.20
  13  -3   3   61.99    2.80
 -13  -3  -3   64.09    2.90
 -13  -3  -3   67.69    2.90
  13  -3   3   64.99    2.60
  13  -3   3   63.29    2.80
 -13  -3  -3   65.19    2.50
 -13  -3  -3   65.49    3.90
  13  -3   3   59.09    3.00
  13  -3   3   70.79    2.70
  13  -3   3   63.99    3.40
  13  -3   3   62.29    2.50
 -13   3  -3   64.59    2.80
 -13   3  -3   63.59    3.30
  13   3   3   60.89    2.60
  13   3   3   63.59    3.60
  13   3   3   65.89    2.50
 -13   3  -3   63.79    3.50
  13   3   3   64.39    2.90
 -13   3  -3   63.59    2.50
  15  -3   3  122.69    4.80
  15  -3   3  134.29    4.40
  15  -3   3  129.49    4.30
 -15  -3  -3  114.19    4.20
  15  -3   3  131.79    4.50
 -15  -3  -3  131.99    4.30
  15  -3   3  125.29    4.50
  15  -3   3  123.69    5.10
 -15  -3  -3  118.09    4.50
  15  -3   3  130.79    4.20
 -15  -3  -3  125.39    5.60
  15   3   3  122.89    5.00
 -15   3  -3  130.09    4.50
 -15   3  -3  123.79    4.90
  15   3   3  118.19    4.20
 -15   3  -3  121.09    5.20
 -15   3  -3  129.09    4.30
  15   3   3  130.19    4.30
  15   3   3  133.19    4.60
 -17  -3  -3   25.50    3.70
 -17  -3  -3   30.50    2.50
  17  -3   3   29.80    2.50
  17  -3   3   21.40    1.90
  17  -3   3   27.30    2.60
  17  -3   3   26.00    2.10
 -17  -3  -3   29.20    2.60
  17  -3   3   28.20    2.20
 -17  -3  -3   30.80    2.30
  17  -3   3   27.40    2.30
 -17   3  -3   23.40    2.00
  17   3   3   26.90    2.80
 -17   3  -3   27.10    2.40
 -17   3  -3   26.50    2.60
 -17   3  -3   27.60    1.90
  17   3   3   29.90    2.60
  17   3   3   29.90    2.30
  17   3   3   25.10    2.50
  19  -3   3   -0.10    1.40
 -19  -3  -3   -0.50    1.20
  19  -3   3   -1.30    1.90
  19  -3   3   -0.60    1.10
  19  -3   3   -1.30    1.20
 -19  -3  -3   -0.70    1.60
  19  -3   3    1.40    1.30
 -19  -3  -3    0.30    1.40
  19  -3   3   -0.10    1.20
 -19  -3  -3   -2.10    1.20
  19   3   3   -0.10    1.30
 -19   3  -3   -1.60    1.30
  19   3   3    0.40    1.00
 -19   3  -3    0.10    1.20
  19   3   3   -1.20    1.20
 -19   3  -3   -2.40    1.80
 -19   3  -3   -0.20    1.30
  19   3   3   -1.20    1.40
  21  -3   3    8.90    2.60
  21  -3   3   11.40    2.00
  21  -3   3   12.50    1.90
 -21  -3  -3   11.40    3.00
 -21  -3  -3   11.10    1.80
  21  -3   3   13.60    2.10
  21  -3   3   14.80    1.90
 -21  -3  -3   11.00    1.70
 -21  -3  -3   10.70    1.70
  21  -3   3   11.40    1.90
  21   3   3   10.70    1.70
 -21   3  -3    9.00    1.80
 -21   3  -3    9.50    2.80
  21   3   3    9.20    1.70
  21   3   3   12.90    1.90
 -21   3  -3   10.70    1.80
 -21   3  -3   12.00    1.90
  21   3   3   13.30    2.60
 -23  -3  -3    5.00    1.60
 -23  -3  -3    5.70    1.90
  23  -3   3    5.50    1.40
 -23  -3  -3    5.30    2.90
  23  -3   3   10.30    2.10
  23  -3   3    7.60    1.80
  23  -3   3    6.80    2.00
 -23  -3  -3    5.40    1.70
  23  -3   3    2.30    1.70
 -23   3  -3    6.20    1.70
 -23   3  -3    5.70    1.90
  23   3   3    0.10    1.70
 -23   3  -3    1.40    2.50
  23   3   3    5.90    1.80
  23   3   3    6.50    2.50
 -23   3  -3    4.60    1.70
  23   3   3    6.30    1.90
 -25  -3  -3    6.80    5.00
  25  -3   3    0.20    1.40
  25  -3   3    0.20    1.40
 -25  -3  -3    2.30    1.50
  25  -3   3    0.00    1.30
  25  -3   3    3.40    1.80
 -25  -3  -3   -0.40    1.50
  25  -3   3    1.90    1.30
  25   3   3    0.90    1.80
  25   3   3    1.90    1.40
  25   3   3    2.30    1.80
 -25   3  -3   -2.20    1.50
 -25   3  -3    0.60    1.30
 -25   3  -3   -0.50    1.20
 -27  -3  -3    1.80    1.60
  27  -3   3    2.70    1.90
 -27  -3  -3   -0.80    1.80
  27  -3   3    2.90    2.00
  27  -3   3    2.70    2.20
 -27   3  -3    2.20    1.90
 -27   3  -3    1.40    2.10
 -27   3  -3   -0.90    1.80
  27   3   3    3.00    2.10
  27   3   3    2.20    1.60
  27   3   3    4.00    2.10
 -29  -3  -3    0.80    2.50
  29  -3   3    4.60    2.20
  29  -3   3    2.20    1.50
  29  -3   3   -0.20    2.30
 -29  -3  -3   -1.30    1.40
 -29   3  -3    1.00    2.20
  29   3   3    1.60    1.60
 -29   3  -3   -0.30    1.40
  29   3   3    4.30    2.20
  29   3   3    1.90    1.70
 -29   3  -3    2.50    2.00
 -28  -4   3    6.30    2.50
 -28  -4   3   -0.10    1.90
 -28  -4   3   -1.20    2.00
  28  -4  -3    2.00    2.00
  28  -4  -3    8.90    2.80
  28  -4  -3    2.20    2.20
 -28   4   3   -0.40    2.10
  28   4  -3    7.00    2.90
  28   4  -3    4.70    2.30
 -28   4   3    1.40    1.90
 -28   4   3    3.00    2.90
 -26  -4   3    2.70    2.00
 -26  -4   3    4.20    1.80
  26  -4  -3    5.30    2.00
  26  -4  -3   10.50    2.80
  26  -4  -3    4.00    2.00
 -26  -4   3    0.30    1.80
  26   4  -3    7.00    2.70
  26   4  -3    2.00    2.00
 -26   4   3    3.00    1.80
 -26   4   3    5.00    2.90
 -26   4   3    1.40    2.00
  24  -4  -3    4.30    1.70
 -24  -4   3    4.60    1.40
 -24  -4   3    4.00    1.80
  24  -4  -3    6.50    2.00
 -24  -4   3    6.80    2.20
  24  -4  -3    5.50    1.80
 -24  -4   3    4.70    1.90
  24  -4  -3    9.80    2.60
 -24   4   3    9.60    3.00
 -24   4   3    5.60    1.80
 -24   4   3    3.60    1.60
  24   4  -3    5.50    1.70
  24   4  -3    7.00    2.20
 -24   4   3    5.30    2.00
  24   4  -3    4.30    1.90
 -22  -4   3    4.50    1.60
 -22  -4   3    3.90    1.40
  22  -4  -3    4.80    2.20
  22  -4  -3    3.90    1.70
  22  -4  -3    2.60    1.50
  22  -4  -3    3.40    1.40
 -22  -4   3    4.60    1.60
 -22  -4   3    4.90    2.00
 -22   4   3    6.50    2.60
  22   4  -3    3.60    2.30
 -22   4   3    2.10    1.10
  22   4  -3    1.50    1.40
 -22   4   3    5.00    1.70
 -22   4   3    5.30    1.50
  22   4  -3    3.50    1.70
 -20  -4   3   11.30    1.80
  20  -4  -3   12.40    3.00
 -20  -4   3   13.20    2.10
  20  -4  -3   11.30    1.70
  20  -4  -3    9.20    1.40
  20  -4  -3   14.00    2.60
  20  -4  -3   12.80    1.90
 -20  -4   3   11.90    1.60
 -20  -4   3   11.20    1.60
  20   4  -3    8.80    1.70
 -20   4   3   10.00    1.80
  20   4  -3   12.90    1.70
 -20   4   3   13.10    2.70
 -20   4   3   10.50    1.60
  20   4  -3   13.80    2.60
 -20   4   3    9.60    1.40
  18  -4  -3   21.80    3.60
  18  -4  -3   19.60    2.00
 -18  -4   3   20.90    2.20
  18  -4  -3   22.80    2.00
  18  -4  -3   18.50    2.50
 -18  -4   3   19.30    2.20
 -18  -4   3   20.20    1.90
 -18  -4   3   22.60    2.10
  18  -4  -3   20.90    2.20
  18   4  -3   24.20    2.60
  18   4  -3   22.90    2.20
 -18   4   3   25.30    2.00
 -18   4   3   17.30    1.90
 -18   4   3   22.30    2.90
  18   4  -3   22.60    2.20
 -18   4   3   21.20    2.30
 -16  -4   3   12.10    1.40
  16  -4  -3   14.20    1.40
 -16  -4   3   13.40    1.70
 -16  -4   3   16.40    2.20
  16  -4  -3   11.50    1.30
  16  -4  -3   15.50    3.00
  16  -4  -3   13.10    1.60
 -16  -4   3   13.60    1.60
  16  -4  -3   13.40    1.70
 -16  -4   3   15.40    1.70
  16  -4  -3   11.10    1.80
 -16   4   3   13.70    2.10
 -16   4   3   13.90    1.50
 -16   4   3   16.30    1.50
  16   4  -3   13.70    1.90
  16   4  -3   15.40    1.60
 -16   4   3   13.30    1.60
  16   4  -3   15.20    1.50
  14  -4  -3    1.60    1.40
  14  -4  -3    1.90    1.00
  14  -4  -3   -0.10    1.90
  14  -4  -3    1.30    1.00
  14  -4  -3    1.40    0.70
 -14  -4   3    4.20    1.00
  14  -4  -3    1.20    0.80
 -14  -4   3    1.30    1.10
  14  -4  -3    3.00    0.80
 -14  -4   3    2.20    0.80
 -14  -4   3    1.10    1.00
 -14  -4   3    2.00    0.90
  14   4  -3    2.40    0.90
 -14   4   3    0.30    1.40
 -14   4   3    2.30    1.00
  14   4  -3   -0.30    2.40
 -14   4   3    0.60    0.70
 -14   4   3    1.50    0.70
  14   4  -3    0.90    1.10
  14   4  -3    1.30    0.70
 -14   4   3    2.60    1.00
  12  -4  -3  117.39    5.70
 -12  -4   3  111.79    4.10
  12  -4  -3  119.89    3.80
  12  -4  -3  113.99    3.50
 -12  -4   3  121.39    4.00
 -12  -4   3  115.79    3.70
  12  -4  -3  120.69    3.90
 -12  -4   3  115.99    3.70
  12  -4  -3  119.19    4.70
  12  -4  -3  113.89    3.80
  12  -4  -3  114.29    3.30
 -12   4   3  116.39    4.80
 -12   4   3  118.39    3.90
  12   4  -3  122.19    5.80
 -12   4   3  111.09    3.30
  12   4  -3  115.69    4.30
  12   4  -3  118.39    3.70
  12   4  -3  117.19    3.80
 -12   4   3  111.39    3.50
  10  -4  -3   19.20    2.30
 -10  -4   3   18.30    1.40
  10  -4  -3   18.00    1.30
  10  -4  -3   18.20    1.00
 -10  -4   3   17.30    1.40
  10  -4  -3   18.80    1.30
 -10  -4   3   19.70    1.30
  10  -4  -3   16.80    1.40
  10  -4  -3   18.90    1.20
 -10  -4   3   18.60    1.60
  10  -4  -3   18.20    1.90
 -10   4   3   17.60    1.00
  10   4  -3   18.80    1.20
  10   4  -3   17.40    2.00
 -10   4   3   17.80    2.00
  10   4  -3   19.10    3.60
 -10   4   3   20.30    1.30
  10   4  -3   16.70    1.30
 -10   4   3   20.90    1.20
   8  -4  -3    6.20    0.80
   8  -4  -3    7.00    1.00
   8  -4  -3    6.00    0.90
   8  -4  -3    6.20    1.80
   8  -4  -3    7.70    0.70
  -8  -4   3    7.00    1.10
   8  -4  -3    6.70    0.70
   8  -4  -3    6.60    1.20
  -8  -4   3    4.70    1.00
  -8  -4   3    7.90    0.80
  -8  -4   3    8.70    1.00
  -8   4   3    5.90    1.20
  -8   4   3    6.30    0.90
  -8   4   3    7.10    0.60
   8   4  -3    7.40    2.20
   8   4  -3    7.50    1.30
   8   4  -3    6.80    0.80
   8   4  -3    7.30    0.80
  -8   4   3    6.70    0.60
  -6  -4   3   54.99    2.30
  -6  -4   3   59.09    1.80
   6  -4  -3   55.79    1.90
   6  -4  -3   52.19    2.70
  -6  -4   3   54.59    2.10
   6  -4  -3   56.69    1.60
  -6  -4   3   55.89    2.50
   6  -4  -3   56.89    2.30
   6  -4  -3   56.39    3.30
   6   4  -3   57.69    3.60
   6   4  -3   57.79    1.80
  -6   4   3   55.39    1.70
   6   4  -3   57.19    2.40
   6   4  -3   57.39    1.90
  -6   4   3   56.59    2.90
  -6   4   3   56.09    2.10
  -4  -4   3    5.50    0.80
  -4  -4   3    5.50    0.60
   4  -4  -3    5.40    1.50
   4  -4  -3    4.70    0.60
  -4  -4   3    4.20    0.70
   4  -4  -3    5.80    0.90
  -4  -4   3    4.60    1.00
   4  -4  -3    6.80    0.50
  -4   4   3    6.50    1.30
   4   4  -3    6.40    0.50
  -4   4   3    4.60    0.70
   4   4  -3    4.70    0.50
  -4   4   3    5.50    0.40
   4   4  -3    6.90    1.80
   4   4  -3    6.70    1.00
   2  -4  -3   25.60    1.70
   2  -4  -3   26.10    1.10
  -2  -4   3   25.50    1.20
  -2  -4   3   25.40    1.60
   2  -4  -3   25.50    2.00
  -2  -4   3   25.60    1.40
   2  -4  -3   26.40    1.00
   2   4  -3   27.50    2.50
  -2   4   3   26.70    1.30
  -2   4   3   25.20    2.00
   2   4  -3   26.00    1.00
   2   4  -3   24.30    1.50
   0  -4  -3  160.18    5.40
   0  -4  -3  161.78    4.20
   0  -4   3  160.78    4.40
   0  -4  -3  165.48    4.10
   0  -4   3  157.28    4.20
   0  -4  -3  159.48    4.90
   0  -4   3  164.18    4.80
   0  -4   3  166.58    4.60
   0   4   3  166.38    5.30
   0   4  -3  161.68    4.40
   0   4  -3  160.28    4.00
   0   4  -3  160.58    5.80
   0   4   3  162.38    4.40
  -2  -4  -3    0.60    0.50
  -2  -4  -3    0.70    0.40
   2  -4   3   -0.80    0.50
  -2  -4  -3    0.10    0.80
   2  -4   3    0.40    0.70
  -2  -4  -3   -0.50    0.90
   2  -4   3   -0.20    0.40
   2  -4   3    0.80    1.10
  -2   4  -3   -0.20    0.90
   2   4   3    0.50    0.20
   2   4   3    0.80    0.60
  -2   4  -3    0.40    0.40
  -2   4  -3    0.00    0.50
   2   4   3    0.80    0.80
  -4  -4  -3   84.69    2.30
   4  -4   3   78.19    2.40
   4  -4   3   78.19    3.60
  -4  -4  -3   78.69    2.50
   4  -4   3   80.09    2.90
  -4  -4  -3   79.69    2.50
   4  -4   3   84.39    2.20
  -4  -4  -3   79.09    3.40
   4  -4   3   82.69    2.60
  -4  -4  -3   82.09    3.20
  -4   4  -3   81.09    3.80
   4   4   3   83.09    2.20
  -4   4  -3   82.09    2.40
   4   4   3   78.89    3.30
   4   4   3   77.19    2.60
  -4   4  -3   80.89    2.60
  -6  -4  -3   99.19    2.80
  -6  -4  -3   97.19    3.40
  -6  -4  -3  100.79    4.10
   6  -4   3   99.19    2.90
   6  -4   3  100.09    3.10
   6  -4   3   98.79    2.70
   6  -4   3   97.29    4.30
   6  -4   3   99.99    3.10
  -6  -4  -3  100.39    3.10
  -6  -4  -3   99.79    3.10
   6  -4   3   99.19    3.60
  -6   4  -3  104.39    3.00
   6   4   3   98.59    2.80
   6   4   3  101.99    4.20
  -6   4  -3  103.09    4.50
   6   4   3  101.19    3.50
   6   4   3  100.59    3.10
  -6   4  -3  103.69    3.20
  -8  -4  -3  169.38    4.90
   8  -4   3  164.68    5.30
   8  -4   3  173.18    4.80
  -8  -4  -3  166.58    4.80
  -8  -4  -3  171.28    6.00
  -8  -4  -3  174.78    4.60
   8  -4   3  173.08    4.70
  -8  -4  -3  170.08    4.90
   8  -4   3  172.58    4.90
   8  -4   3  171.18    4.50
   8  -4   3  173.18    6.20
   8   4   3  172.88    4.60
   8   4   3  171.28    4.80
   8   4   3  170.78    4.90
  -8   4  -3  174.88    4.80
  -8   4  -3  171.18    6.30
   8   4   3  171.68    5.90
  -8   4  -3  170.48    4.90
 -10  -4  -3    9.60    1.20
  10  -4   3    9.80    1.00
 -10  -4  -3   10.60    1.10
  10  -4   3    9.60    1.00
  10  -4   3   11.70    1.20
 -10  -4  -3    9.70    2.00
  10  -4   3   10.40    1.00
 -10  -4  -3   10.30    1.30
  10  -4   3   10.40    1.20
  10  -4   3    9.40    1.90
  10  -4   3   10.10    1.40
 -10   4  -3    9.20    1.90
  10   4   3    9.50    1.20
  10   4   3    8.10    0.90
 -10   4  -3   10.00    1.20
 -10   4  -3    9.30    1.10
  10   4   3    9.00    1.60
 -10   4  -3    8.10    1.30
  12  -4   3   39.40    2.00
  12  -4   3   38.60    2.10
  12  -4   3   37.80    2.10
 -12  -4  -3   52.39    3.60
  12  -4   3   37.20    1.80
 -12  -4  -3   33.70    2.00
  12  -4   3   39.00    2.10
  12  -4   3   40.70    3.10
  12  -4   3   41.20    2.70
 -12  -4  -3   43.00    2.30
 -12   4  -3   38.50    3.20
  12   4   3   38.20    2.00
 -12   4  -3   39.40    2.80
 -12   4  -3   38.40    2.10
  12   4   3   43.00    2.30
 -12   4  -3   41.60    2.30
  12   4   3   48.70    3.50
  12   4   3   36.00    2.00
  14  -4   3   75.39    3.80
 -14  -4  -3   68.49    4.00
 -14  -4  -3   69.49    3.20
 -14  -4  -3   68.69    2.90
  14  -4   3   70.09    2.90
  14  -4   3   72.99    3.10
 -14  -4  -3   65.29    2.90
  14  -4   3   66.39    2.80
  14  -4   3   67.29    3.10
  14  -4   3   71.59    4.10
  14  -4   3   72.29    3.00
  14   4   3   74.19    3.20
 -14   4  -3   70.59    3.10
  14   4   3   67.59    3.80
  14   4   3   70.19    2.90
 -14   4  -3   71.99    4.30
  14   4   3   67.89    2.90
 -14   4  -3   72.49    3.00
 -14   4  -3   72.39    3.80
  16  -4   3   29.80    2.00
 -16  -4  -3   27.10    2.20
  16  -4   3   31.20    2.40
 -16  -4  -3   29.20    1.90
 -16  -4  -3   30.30    2.20
  16  -4   3   30.30    3.10
  16  -4   3   34.40    2.40
  16  -4   3   31.70    2.10
 -16  -4  -3   27.50    3.00
  16  -4   3   29.20    2.20
  16  -4   3   29.60    3.10
 -16   4  -3   29.90    2.30
 -16   4  -3   31.90    3.30
  16   4   3   29.00    2.10
 -16   4  -3   29.20    2.10
 -16   4  -3   29.70    3.10
  16   4   3   29.80    2.90
  16   4   3   26.80    1.90
  16   4   3   31.30    2.20
 -18  -4  -3   -0.80    1.10
  18  -4   3   -2.00    0.80
  18  -4   3   -0.10    0.80
 -18  -4  -3   -0.10    1.60
  18  -4   3   -0.80    1.80
 -18  -4  -3   -2.00    1.20
 -18  -4  -3   -1.80    1.30
  18  -4   3   -2.80    1.30
  18  -4   3   -0.70    1.00
  18  -4   3    0.00    1.20
  18   4   3   -2.10    1.30
  18   4   3   -1.10    1.10
 -18   4  -3   -1.60    0.80
  18   4   3   -2.60    1.10
 -18   4  -3   -0.50    1.30
 -18   4  -3    0.10    0.80
 -18   4  -3   -2.70    1.70
  18   4   3   -0.80    1.50
 -20  -4  -3   76.99    5.20
  20  -4   3   75.19    3.60
  20  -4   3   69.69    4.60
  20  -4   3   75.89    4.00
  20  -4   3   74.29    3.70
 -20  -4  -3   72.49    3.80
 -20  -4  -3   61.29    3.40
  20  -4   3   69.69    3.70
  20  -4   3   75.79    3.50
 -20  -4  -3   79.69    3.60
  20   4   3   79.69    3.90
  20   4   3   69.49    3.90
 -20   4  -3   75.59    3.60
  20   4   3   67.39    4.30
 -20   4  -3   79.39    3.70
 -20   4  -3   76.99    4.80
 -20   4  -3   73.19    3.80
  20   4   3   73.79    3.60
 -22  -4  -3   34.40    4.40
 -22  -4  -3   26.30    2.60
  22  -4   3   26.80    3.90
 -22  -4  -3   34.60    2.90
  22  -4   3   35.10    2.70
 -22  -4  -3   36.50    3.20
  22  -4   3   31.60    3.10
  22  -4   3   37.60    2.90
  22  -4   3   35.60    3.00
  22  -4   3   36.50    3.20
 -22   4  -3   32.80    3.00
  22   4   3   35.90    3.10
  22   4   3   28.20    2.70
  22   4   3   29.30    2.40
 -22   4  -3   31.60    2.90
 -22   4  -3   32.60    4.10
  22   4   3   34.10    4.10
 -22   4  -3   26.90    2.30
 -22   4  -3   34.60    2.90
  24  -4   3    2.60    1.60
 -24  -4  -3    4.80    2.20
 -24  -4  -3    2.10    2.70
  24  -4   3    0.30    1.40
 -24  -4  -3    2.80    1.40
  24  -4   3    3.10    1.70
  24  -4   3   -0.40    1.70
 -24  -4  -3    1.30    1.70
  24   4   3    1.20    1.70
  24   4   3    0.60    1.80
 -24   4  -3    0.80    1.60
 -24   4  -3   -1.40    1.50
  24   4   3    2.10    2.50
 -24   4  -3    1.50    1.60
 -24   4  -3    1.00    1.70
  24   4   3    2.30    1.80
 -26  -4  -3    4.10    1.90
  26  -4   3    3.50    2.10
  26  -4   3    5.90    2.10
 -26  -4  -3    2.30    1.90
 -26   4  -3    7.00    2.10
 -26   4  -3    4.20    1.90
  26   4   3    5.80    2.10
  26   4   3    8.00    2.50
  26   4   3    9.00    2.30
 -26   4  -3    5.10    2.10
 -28  -4  -3    5.90    2.20
 -28  -4  -3    3.70    2.10
  28  -4   3    6.40    2.20
  28  -4   3    3.90    1.60
  28  -4   3    5.70    2.40
  28   4   3    5.20    2.30
 -28   4  -3    4.20    2.20
 -28   4  -3    5.50    2.10
 -28   4  -3    4.80    1.70
  28   4   3    4.80    1.80
  28   4   3   10.20    3.20
 -27  -5   3   -0.60    1.30
  27  -5  -3    2.10    3.10
  27  -5  -3    5.90    2.60
 -27  -5   3    0.80    2.30
 -27  -5   3   -2.60    2.00
  27  -5  -3    0.90    1.50
 -27   5   3   -0.90    1.40
  27   5  -3    3.80    2.80
  27   5  -3    4.70    2.00
 -27   5   3    0.20    1.90
 -27   5   3    1.00    2.80
 -25  -5   3   -1.40    1.30
  25  -5  -3    1.00    1.60
  25  -5  -3    0.80    1.80
 -25  -5   3    1.00    1.20
 -25  -5   3    2.10    1.70
  25  -5  -3    2.70    2.40
  25  -5  -3    0.60    1.80
 -25   5   3   -2.60    1.80
 -25   5   3   -1.20    1.70
  25   5  -3    3.90    2.10
 -25   5   3   -0.80    1.50
  25   5  -3   -0.50    1.30
 -25   5   3    3.20    2.70
  23  -5  -3    4.50    2.30
 -23  -5   3    0.20    1.10
 -23  -5   3    0.70    1.70
  23  -5  -3    1.00    1.40
 -23  -5   3    2.00    1.50
  23  -5  -3    0.70    1.70
  23  -5  -3    2.20    1.50
 -23  -5   3   -0.60    1.40
  23   5  -3    0.90    1.50
  23   5  -3    3.50    2.50
 -23   5   3    0.60    1.40
 -23   5   3    1.50    1.40
  23   5  -3   -0.30    1.40
 -23   5   3   -1.30    2.20
 -23   5   3   -0.80    1.60
  21  -5  -3   23.30    2.60
  21  -5  -3   27.20    2.30
  21  -5  -3   26.70    3.00
 -21  -5   3   18.80    2.10
 -21  -5   3   26.10    2.50
  21  -5  -3   31.10    4.50
 -21  -5   3   22.10    2.50
  21  -5  -3   25.70    2.80
 -21  -5   3   27.20    2.60
  21   5  -3   28.50    3.80
  21   5  -3   29.90    2.60
 -21   5   3   27.30    3.90
 -21   5   3   28.10    2.30
 -21   5   3   26.30    2.50
 -21   5   3   22.20    2.50
  21   5  -3   25.00    2.60
  19  -5  -3    7.50    1.40
 -19  -5   3    8.40    1.50
 -19  -5   3    8.80    1.60
  19  -5  -3    7.90    1.40
 -19  -5   3    6.30    1.90
  19  -5  -3    6.70    1.50
 -19  -5   3    5.10    1.50
  19  -5  -3    6.00    2.10
  19  -5  -3    9.00    3.00
  19   5  -3    5.00    1.40
 -19   5   3    7.60    1.30
 -19   5   3    8.00    1.50
 -19   5   3    8.80    2.50
 -19   5   3    8.00    1.40
  19   5  -3    8.60    1.60
  19   5  -3   10.30    2.40
 -17  -5   3   10.00    2.00
  17  -5  -3    7.30    1.40
 -17  -5   3    6.20    1.70
 -17  -5   3    9.00    1.40
  17  -5  -3    6.50    1.50
  17  -5  -3    7.00    1.20
  17  -5  -3    4.30    1.90
 -17  -5   3    5.70    1.30
  17  -5  -3    7.80    2.40
 -17  -5   3    8.60    1.60
 -17   5   3    6.60    1.50
  17   5  -3    6.90    1.40
 -17   5   3    8.20    2.20
 -17   5   3    7.50    1.20
  17   5  -3    7.70    1.30
  17   5  -3    8.90    2.20
 -17   5   3    7.00    1.40
 -15  -5   3   43.10    2.50
  15  -5  -3   42.90    3.90
  15  -5  -3   40.40    2.10
 -15  -5   3   39.30    2.70
  15  -5  -3   40.00    3.40
 -15  -5   3   41.10    2.20
 -15  -5   3   42.60    2.30
 -15  -5   3   38.60    2.80
  15  -5  -3   41.80    2.30
  15  -5  -3   38.70    2.50
  15  -5  -3   35.50    2.80
  15   5  -3   41.10    2.30
  15   5  -3   45.00    3.40
 -15   5   3   41.70    2.00
  15   5  -3   40.20    2.10
 -15   5   3   35.30    2.90
 -15   5   3   38.90    2.40
 -13  -5   3    2.80    1.20
  13  -5  -3    3.70    1.20
 -13  -5   3    0.50    1.00
  13  -5  -3    2.30    2.20
 -13  -5   3    3.40    1.30
 -13  -5   3    2.50    0.90
  13  -5  -3    1.60    1.00
  13  -5  -3    1.80    0.80
  13  -5  -3    3.30    0.90
  13  -5  -3    2.80    1.20
 -13  -5   3    3.50    0.90
  13   5  -3    2.30    1.60
 -13   5   3    1.70    0.80
  13   5  -3    2.70    2.60
 -13   5   3    3.10    0.80
  13   5  -3    1.90    0.80
 -13   5   3    3.10    1.30
 -13   5   3    2.50    1.00
  13   5  -3    3.10    0.90
  11  -5  -3   45.80    1.80
  11  -5  -3   39.50    2.00
 -11  -5   3   40.60    2.20
  11  -5  -3   45.60    3.60
 -11  -5   3   47.50    2.00
 -11  -5   3   44.40    2.20
  11  -5  -3   45.80    2.10
 -11  -5   3   42.00    2.60
  11  -5  -3   42.10    1.70
  11  -5  -3   45.30    3.00
  11  -5  -3   43.60    2.20
 -11   5   3   42.60    1.70
 -11   5   3   42.50    2.20
  11   5  -3   41.40    2.00
 -11   5   3   44.10    3.10
  11   5  -3   46.30    2.00
  11   5  -3   47.70    3.00
 -11   5   3   44.30    1.80
  11   5  -3   51.69    4.80
   9  -5  -3   87.29    3.90
   9  -5  -3   98.19    3.50
   9  -5  -3   92.99    2.70
  -9  -5   3   98.79    3.80
   9  -5  -3   95.99    2.80
   9  -5  -3   95.99    3.00
  -9  -5   3   96.39    3.50
  -9  -5   3  101.79    3.00
  -9  -5   3   99.19    3.20
   9  -5  -3   90.39    4.80
   9   5  -3   97.89    3.10
  -9   5   3   92.29    4.00
  -9   5   3   99.09    3.30
   9   5  -3   96.39    3.90
   9   5  -3   97.39    5.20
   9   5  -3   95.79    3.00
  -9   5   3   93.09    2.70
   7  -5  -3   35.10    2.30
   7  -5  -3   34.70    1.30
  -7  -5   3   37.00    1.50
  -7  -5   3   33.50    2.20
  -7  -5   3   32.20    1.80
   7  -5  -3   36.90    1.50
  -7  -5   3   36.60    1.70
   7  -5  -3   34.80    2.90
   7  -5  -3   36.10    2.00
   7   5  -3   36.10    1.40
   7   5  -3   37.10    2.40
   7   5  -3   36.40    3.50
  -7   5   3   36.30    1.80
  -7   5   3   35.10    2.40
   7   5  -3   35.40    1.50
  -7   5   3   35.70    1.30
   5  -5  -3  123.89    5.50
   5  -5  -3  127.29    4.20
   5  -5  -3  122.69    3.40
  -5  -5   3  131.89    3.30
   5  -5  -3  125.29    3.20
  -5  -5   3  123.69    3.60
  -5  -5   3  121.39    3.90
  -5  -5   3  121.59    4.20
   5   5  -3  125.59    3.40
  -5   5   3  128.79    3.80
   5   5  -3  129.49    5.50
  -5   5   3  121.69    4.60
  -5   5   3  124.29    3.10
   5   5  -3  127.09    3.30
   5   5  -3  123.59    4.20
   3  -5  -3  310.27    7.50
   3  -5  -3  308.67    7.40
  -3  -5   3  315.57    8.00
   3  -5  -3  307.77    8.40
  -3  -5   3  321.07    7.20
  -3  -5   3  316.57    7.70
  -3  -5   3  312.47    8.50
   3  -5  -3  321.37    9.80
  -3   5   3  319.57    9.00
   3   5  -3  315.27    9.70
   3   5  -3  304.77    7.40
   3   5  -3  311.07    8.20
   3   5  -3  297.07    7.20
  -3   5   3  307.37    7.80
  -1  -5   3   26.60    1.00
  -1  -5   3   24.20    1.30
   1  -5  -3   25.30    2.00
   1  -5  -3   27.00    2.40
  -1  -5   3   25.40    1.90
  -1  -5   3   22.70    1.50
   1  -5  -3   24.50    1.10
   1  -5  -3   25.40    1.20
  -1   5   3   23.80    1.50
   1   5  -3   28.90    2.80
   1   5  -3   26.60    0.90
   1   5  -3   23.30    1.60
  -1   5   3   22.90    2.00
   1  -5   3  745.23   17.00
  -1  -5  -3  729.63   16.90
   1  -5   3  737.63   16.60
  -1  -5  -3  729.33   18.70
  -1  -5  -3  740.73   16.90
   1  -5   3  750.32   17.90
   1  -5   3  733.63   18.90
   1  -5   3  709.53   17.20
  -1  -5  -3  737.13   18.10
  -1   5  -3  725.83   16.60
  -1   5  -3  720.03   19.10
   1   5   3  731.23   18.40
  -1   5  -3  714.43   17.30
   1   5   3  722.43   17.10
   3  -5   3  522.75   12.50
   3  -5   3  510.75   12.80
  -3  -5  -3  533.05   14.00
  -3  -5  -3  536.95   13.90
   3  -5   3  529.25   14.60
  -3  -5  -3  532.05   12.60
  -3  -5  -3  530.25   12.70
   3  -5   3  549.54   13.50
  -3  -5  -3  552.64   12.20
   3   5   3  526.85   12.70
  -3   5  -3  538.85   12.40
   3   5   3  544.25   12.20
  -3   5  -3  543.95   14.90
  -3   5  -3  514.55   12.90
   3   5   3  535.05   14.10
   3   5   3  520.85   13.90
  -5  -5  -3   61.09    2.20
  -5  -5  -3   54.49    2.90
   5  -5   3   57.29    2.30
   5  -5   3   54.49    3.30
   5  -5   3   56.89    2.00
  -5  -5  -3   59.79    1.80
   5  -5   3   59.19    1.70
   5  -5   3   56.79    2.60
  -5  -5  -3   54.39    2.80
  -5  -5  -3   55.49    2.10
  -5   5  -3   57.59    2.00
   5   5   3   55.79    3.10
   5   5   3   56.79    2.20
  -5   5  -3   56.19    2.30
  -5   5  -3   56.59    1.70
   5   5   3   60.19    1.80
   5   5   3   56.19    2.90
  -5   5  -3   56.49    3.70
   7  -5   3  125.29    4.00
   7  -5   3  126.79    4.50
  -7  -5  -3  127.89    3.80
  -7  -5  -3  126.09    4.40
   7  -5   3  128.69    3.40
  -7  -5  -3  127.79    3.90
   7  -5   3  127.49    5.50
   7  -5   3  126.69    3.90
  -7  -5  -3  129.89    3.50
   7  -5   3  124.19    3.60
  -7  -5  -3  129.69    5.10
   7   5   3  126.99    3.50
   7   5   3  131.79    5.20
  -7   5  -3  124.29    3.60
   7   5   3  125.89    3.90
  -7   5  -3  125.79    4.10
   7   5   3  127.79    4.50
  -7   5  -3  129.59    5.70
   9  -5   3    0.00    1.50
   9  -5   3    0.80    1.10
   9  -5   3    1.50    0.80
  -9  -5  -3    0.60    0.70
   9  -5   3    0.60    0.60
[truncated: 1,058,630 more chars]
